# Supplementary material
Source: Research Square preprint supplement (doi:10.21203/rs.3.rs-10343202/v1)
Supplement: Supplementary file 1 [file 268da11c557dd2857c393c13.docx]

**Table S5.** Principal limitations of our study

| **#** | **Limitation** | **Description** |
| --- | --- | --- |
| 1. | **Sample size** | At n = 41/40 the study is appropriately powered for discovery of large effect sizes (d > 0.8 at 80% power) but is underpowered for small effects. Targeted replication in a cohort of n ≥ 200 per arm is needed before any biomarker claim can be made. |
| 2. | **Sex–age imbalance** | The control arm was 75% female and 6 years younger than the SCZ arm (Fisher's p = 0.0065, Welch's t p = 0.031). All confirmatory analyses adjust for these covariates, but residual confounding cannot be excluded. The positive-vs-negative symptom contrast was particularly distorted (81% male vs 93% female by accident of subgroup membership) and must be interpreted with caution. |
| 3. | **All patients are on antipsychotics in acute exacerbation** | Drug-naitve replication is essential. Our subgroup deconfounding partially mitigates this by partitioning variance attributable to CPZeq dose, clozapine status and AP class, but a fully drug-naitve cohort would resolve residual confounding. |
| 4. | Targeted HILIC MRM panel ≠ global metabolome | The pathway-enrichment dominance of glycerophospholipid metabolism reflects in part panel coverage. Untargeted lipidomics in the same cohort would strengthen the membrane-remodelling hypothesis. |
| 5. | Smoking status was recorded for SCZ patients only | This precludes a direct smoking-stratified SCZ vs Control test. For all SCZ-vs-Ct effect-size comparisons we therefore report both the unadjusted estimate and the smoking-adjusted-within-SCZ estimate. |
| 6. | The metabolite-to-gene mapping uses canonical KEGG/HMDB assignments | Tissue- and brain-specific isoform usage, which may modulate the in-vivo relevance of LPCAT4 vs LPCAT1 vs LPCAT3, was not directly addressed. |
| 7. | Cross-sectional design | Longitudinal sampling would distinguish state from trait markers and would directly test whether the purinergic axis tracks symptom trajectory. |
