# Supplementary material
Source: Research Square preprint supplement (doi:10.21203/rs.3.rs-10343202/v1)
Supplement: Supplementary file 2 [file 4942676d5e0991a243748e09.docx]

**Supplementary Materials**

**S1. Sample preparation**

Plasma sample preparation was carried out according to the protocol described by Basov et al. [2]. 400 µL of a chilled MeOH–ACN mixture (1:1, v/v) was added to 100 µL of blood plasma. The samples were vortexed, shaken for 15 min, and centrifuged at +4 °C and 16,000 rpm for 15 min. The supernatants were transferred to plastic vial inserts and analyzed by targeted LC–MS/MS. Each sample was analyzed twice.

**S2. HPLC–MS/MS conditions**

Chromatographic separation was performed using an LC-20AD Prominence chromatograph (Shimadzu, Japan) equipped with a SIL-20AC autosampler (Shimadzu, Japan), thermostated at 10 °C. The injection volume was 10 µL. A perfectSil 100 NH2 chromatographic column (250 × 4.6 mm, 5 µm) from MZ-Analysentechnik was used for HILIC separation. Mobile phases:eluent A — water + 0.1% formic acid (FA); eluent B — acetonitrile (ACN) + 0.1% FA. Gradient programme:0–15 min, eluent B decreased from 90% to 55%; 15–27 min, eluent B held at 55%. Flow rate: 0.4 mL/min.

Mass spectrometric detection of metabolites was performed in multiple reaction monitoring (MRM) mode with positive/negative ion polarity switching using an API 6500 QTRAP mass spectrometer (AB SCIEX, USA) equipped with an electrospray ionization (ESI) source. The ion spray voltage was set at +5500 V for positive ionization mode and −4500 V for negative ionization mode.

Main mass spectrometry parameters

| **Parameter** | **Value** |
| --- | --- |
| Ion spray voltage (IS), positive mode | +5500 V |
| Ion spray voltage (IS), negative mode | −4500 V |
| Source temperature | 475 °C |
| Collision cell (CAD) gas | Medium |
| Gas 1 (Nebuliser) | 22.75 N/cm² |
| Gas 2 (Turbo V) | 22.75 N/cm² |
| Curtain gas | 20.68 N/cm² |
| Declustering potential (DP) | ±91 V |
| Entrance potential (EP) | ±10 V |
| Collision cell exit potential (CXP) | ±9 V |
| MRM dwell time | 5 ms |

The precursor and fragment ion transitions, metabolite names, and corresponding collision energies were partially adapted from Li et al. [1] and partially established in-house by direct infusion of pure reference standards on the mass spectrometer. Instrument control and data acquisition were performed using Analyst 1.6.3 software (AB SCIEX).

MRM transitions in positive ion mode. Where “auto” in the name indicates that the transition was optimised using the instrument software, and “manual” indicates it was developed manually through direct infusion of pure standards. “principal” and “qualifier” designate the quantifier and qualifier ion transitions, respectively. List the complete MRM transition library used during method development, including qualifier ions and software-optimised (auto) or manually developed transition variants. The final analytical method employed 215 MRM transitions (one principal transition per metabolite, with some metabolites monitored in both polarity modes), which after QC filtering and merging of isobaric chromatographic peaks yielded 171 unique metabolites as reported in the main text.

| **Q1 (m/z)** | **Q3 (m/z)** | **Dwell (ms)** | **Metabolite name** | **CE (V)** |
| --- | --- | --- | --- | --- |
| 61.000 | 44.000 | 5.0 | Urea_pos | 70.000 |
| 62.100 | 44.200 | 5.0 | Ethanolamine_pos | 12.000 |
| 74.100 | 57.100 | 5.0 | Methylguanidine_pos | 19.750 |
| 76.030 | 30.030 | 5.0 | Glycine_pos | 18.000 |
| 76.100 | 42.000 | 5.0 | Trimethylamine-N-oxide_pos | 50.000 |
| 78.000 | 61.000 | 5.0 | Cysteamine_pos | 16.360 |
| 90.090 | 44.000 | 5.0 | Sarcosine_pos | 19.110 |
| 90.100 | 44.200 | 5.0 | Alanine_pos | 13.000 |
| 90.100 | 72.100 | 5.0 | beta-Alanine_pos | 11.400 |
| 102.000 | 58.000 | 5.0 | Betaine aldehyde_pos | 21.000 |
| 104.000 | 60.000 | 5.0 | Choline_pos | 5.000 |
| 104.020 | 58.000 | 5.0 | Dimethylglycine_pos | 21.000 |
| 104.100 | 86.000 | 5.0 | 3-Aminoisobutyric acid_pos | 10.180 |
| 106.000 | 60.000 | 5.0 | L-Serine_pos | 13.000 |
| 110.000 | 92.000 | 5.0 | Hypotaurine_pos | 12.720 |
| 112.000 | 95.000 | 5.0 | Histamine_pos | 26.000 |
| 112.100 | 95.000 | 5.0 | Cytosine_pos | 27.500 |
| 114.100 | 86.100 | 5.0 | Creatinine_pos | 15.000 |
| 114.200 | 67.700 | 5.0 | 1-Pyrroline-5-carboxylic acid_pos | 19.000 |
| 116.100 | 70.100 | 5.0 | L-Proline_pos | 13.000 |
| 118.000 | 58.000 | 5.0 | Betaine_pos | 5.000 |
| 118.000 | 72.000 | 5.0 | Guanidinoacetic acid_pos | 19.870 |
| 118.000 | 91.000 | 5.0 | Indole_pos | 26.000 |
| 118.100 | 55.200 | 5.0 | L-Valine_pos | 13.000 |
| 120.000 | 74.000 | 5.0 | Threonine_pos | 13.000 |
| 121.110 | 94.000 | 5.0 | Purine_pos | 25.000 |
| 122.000 | 59.000 | 5.0 | Cysteine_pos | 31.800 |
| 123.100 | 80.000 | 5.0 | Nicotinamide_pos | 22.000 |
| 127.000 | 110.000 | 5.0 | Thymine_pos | 17.000 |
| 127.002 | 81.000 | 5.0 | Imidazoleacetic acid_pos | 15.000 |
| 130.000 | 84.000 | 5.0 | Pipecolic acid_pos | 18.000 |
| 131.001 | 114.000 | 5.0 | N-acetylputrescine_pos | 12.000 |
| 131.900 | 90.000 | 5.0 | N-acetyl-L-alanine_pos_(principal) | 15.000 |
| 132.000 | 90.100 | 5.0 | Creatine_pos | 16.700 |
| 132.004 | 68.200 | 5.0 | Hydroxyproline_pos | 19.000 |
| 132.170 | 86.000 | 5.0 | L-leucine + L-Isoleucine_pos | 11.000 |
| 133.000 | 70.000 | 5.0 | Ornithine_pos | 12.000 |
| 133.120 | 74.000 | 5.0 | L-Asparagine_pos | 17.000 |
| 136.020 | 119.020 | 5.0 | Methylcysteine_pos | 12.000 |
| 136.035 | 90.037 | 5.0 | Homocysteine_pos | 10.000 |
| 136.130 | 119.035 | 5.0 | Adenine_pos | 32.000 |
| 137.001 | 94.000 | 5.0 | 1-Methylnicotinamide_pos | 20.000 |
| 138.100 | 121.200 | 5.0 | Tyramine_pos | 15.120 |
| 139.100 | 106.000 | 5.0 | Nicotinamide N-oxide_pos | 28.000 |
| 142.000 | 44.000 | 5.0 | O-Phosphoethanolamine_pos | 22.000 |
| 142.000 | 95.000 | 5.0 | Histidinol_pos_(qualifier) | 28.120 |
| 142.100 | 95.000 | 5.0 | Histidinol_pos_(principal) | 20.000 |
| 146.100 | 87.000 | 5.0 | Acetylcholine_pos | 21.000 |
| 147.000 | 130.200 | 5.0 | L-Glutamine_pos | 14.000 |
| 147.110 | 84.000 | 5.0 | L-Lysine_pos | 22.000 |
| 148.000 | 106.000 | 5.0 | O-acetylserine_pos | 14.000 |
| 148.053 | 84.048 | 5.0 | L-Glutamic acid_pos | 15.000 |
| 150.100 | 133.000 | 5.0 | L-Methionine_pos | 12.000 |
| 150.100 | 119.200 | 5.0 | 1-Methyladenine_pos | 34.460 |
| 152.200 | 110.000 | 5.0 | Guanine_pos | 20.000 |
| 154.050 | 74.100 | 5.0 | cysteine sulfinate_pos | 29.000 |
| 154.100 | 137.200 | 5.0 | Dopamine_pos | 16.000 |
| 156.000 | 110.000 | 5.0 | L-Histidine_pos | 12.000 |
| 160.000 | 55.300 | 5.0 | DL-2-Aminooctanoic acid_pos | 21.000 |
| 162.100 | 103.000 | 5.0 | L-Carnitine_pos | 20.000 |
| 166.000 | 149.000 | 5.0 | 7-methylguanine_pos | 30.000 |
| 166.040 | 74.000 | 5.0 | Methionine sulfoxide_pos | 14.000 |
| 166.100 | 120.080 | 5.0 | L-Phenylalanine_pos | 40.000 |
| 168.100 | 93.900 | 5.0 | Pyridoxal_pos | 34.000 |
| 169.800 | 107.100 | 5.0 | Norepinephrine_pos | 26.300 |
| 170.100 | 124.000 | 5.0 | 1-Methylhistidine_pos | 20.000 |
| 175.020 | 60.000 | 5.0 | arginine_pos | 16.000 |
| 175.200 | 115.100 | 5.0 | N-Acetylornithine_pos | 14.000 |
| 176.000 | 159.000 | 5.0 | Citrulline_pos_(principal) | 14.000 |
| 177.100 | 160.000 | 5.0 | Serotonin_pos | 18.000 |
| 180.000 | 162.000 | 5.0 | Glucosamine_pos | 11.800 |
| 182.100 | 77.000 | 5.0 | L-Tyrosine_pos | 39.000 |
| 183.800 | 77.200 | 5.0 | Epinephrine_pos | 55.300 |
| 184.100 | 166.300 | 5.0 | Normetanephrine_pos | 13.000 |
| 186.000 | 88.000 | 5.0 | DL-O-Phosphoserine_pos | 12.000 |
| 188.000 | 112.000 | 5.0 | N-acetyl spermidine_pos | 25.000 |
| 189.002 | 84.000 | 5.0 | Acetyllysine_pos | 23.000 |
| 189.100 | 130.000 | 5.0 | N-acetyl-glutamine_pos | 17.000 |
| 189.100 | 144.100 | 5.0 | Homoarginine_pos | 20.900 |
| 190.100 | 84.100 | 5.0 | N-acetyl-glutamate _pos | 24.000 |
| 192.300 | 146.200 | 5.0 | 5-Hydroxyindoleacetic acid_pos | 18.000 |
| 202.000 | 120.000 | 5.0 | Cysteine-S-sulfate_pos | 18.000 |
| 203.000 | 70.000 | 5.0 | Dimethyl-L-arginine_pos | 30.000 |
| 203.200 | 84.100 | 5.0 | Spermine_pos | 43.290 |
| 204.000 | 85.000 | 5.0 | L-Acetylcarnitine_pos | 19.000 |
| 205.000 | 146.000 | 5.0 | L-Tryptophan_pos | 21.000 |
| 209.100 | 94.000 | 5.0 | L-Kynurenine_pos | 19.200 |
| 217.120 | 158.300 | 5.0 | N-alpha-Acetylarginine_pos | 23.020 |
| 218.300 | 85.000 | 5.0 | Propionylcarnitine_pos | 25.000 |
| 222.000 | 138.000 | 5.0 | N-acetyl-glucosamine_pos | 18.000 |
| 223.000 | 121.000 | 5.0 | Flavone_pos | 29.000 |
| 227.100 | 109.900 | 5.0 | Carnosine_pos | 37.500 |
| 232.150 | 85.000 | 5.0 | Butyrylcarnitine_pos | 25.000 |
| 233.100 | 174.100 | 5.0 | Melatonin_pos | 26.700 |
| 235.000 | 176.000 | 5.0 | 5-methoxytryptophan_pos | 22.000 |
| 241.002 | 74.000 | 5.0 | Cystine_pos_(principal) | 32.000 |
| 244.000 | 112.000 | 5.0 | Cytidine_pos | 12.000 |
| 244.300 | 85.000 | 5.0 | Tiglylcarnitine_pos | 35.830 |
| 246.300 | 85.000 | 5.0 | Isovalerylcarnitine_pos | 32.350 |
| 248.150 | 85.000 | 5.0 | Malonylcarnitine_pos | 35.830 |
| 254.100 | 206.300 | 5.0 | Neopterin_pos | 29.000 |
| 258.100 | 104.000 | 5.0 | Glycerophosphocholine_pos | 16.000 |
| 259.000 | 110.000 | 5.0 | Acadesine _pos | 24.000 |
| 260.170 | 85.000 | 5.0 | Hexanoylcarnitine_pos | 25.000 |
| 262.200 | 85.000 | 5.0 | 3-Hydroxyisovaleryl carnitine_pos | 35.000 |
| 265.000 | 122.000 | 5.0 | Thiamine_pos | 17.000 |
| 268.000 | 88.000 | 5.0 | S-ribosyl-L-homocysteine_pos | 31.000 |
| 268.241 | 136.000 | 5.0 | Adenosine_pos | 27.000 |
| 276.170 | 85.000 | 5.0 | 3-Hydroxyhexanoylcarnitine_pos | 35.830 |
| 276.300 | 85.000 | 5.0 | L-Glutarylcarnitine_pos | 29.350 |
| 277.000 | 84.000 | 5.0 | Saccharopine_pos | 36.000 |
| 281.800 | 150.000 | 5.0 | 1-Methyladenosine_pos | 27.000 |
| 286.190 | 85.000 | 5.0 | 2-Octenoylcarnitine_pos | 35.830 |
| 289.300 | 97.100 | 5.0 | Testosterone_pos | 30.900 |
| 290.150 | 85.000 | 5.0 | Adipoylcarnitine_pos | 35.830 |
| 291.200 | 70.000 | 5.0 | arginosuccinic acid_pos | 34.000 |
| 298.002 | 166.000 | 5.0 | 7-Methylguanosine_pos | 24.000 |
| 298.300 | 136.000 | 5.0 | 5-Methylthioadenosine_pos | 29.000 |
| 304.200 | 85.000 | 5.0 | Pimelylcarnitine_pos | 35.830 |
| 318.190 | 85.000 | 5.0 | Suberylcarnitine_pos | 35.830 |
| 324.000 | 112.000 | 5.0 | Cytidine monophosphate_pos | 16.000 |
| 332.000 | 136.000 | 5.0 | Deoxyadenosine monophosphate_pos | 21.000 |
| 335.000 | 123.000 | 5.0 | Nicotinamide ribotide_pos | 30.000 |
| 348.000 | 135.000 | 5.0 | 2-Deoxyguanosine 5-monophosphate_pos | 36.000 |
| 348.060 | 136.000 | 5.0 | Adenosine monophosphate_pos | 23.000 |
| 348.300 | 287.300 | 5.0 | Anandamide_pos | 18.500 |
| 360.270 | 85.000 | 5.0 | 3-Hydroxydodecanoylcarnitine_pos | 35.830 |
| 363.200 | 77.200 | 5.0 | Cortisol _pos | 115.300 |
| 364.000 | 152.000 | 5.0 | Guanosine monophosphate_pos | 19.000 |
| 365.000 | 97.000 | 5.0 | Xanthosine-5-phosphate_pos | 13.000 |
| 377.000 | 243.000 | 5.0 | Riboflavin_pos | 24.000 |
| 385.100 | 136.000 | 5.0 | S-adenosyl-L-homoCysteine_pos | 21.000 |
| 386.500 | 85.000 | 5.0 | 3-Hydroxy-cis-5-tetradecenoylcarnitine _pos | 35.830 |
| 398.600 | 85.000 | 5.0 | 9-Hexadecenoylcarnitine_pos | 35.830 |
| 399.100 | 250.000 | 5.0 | S-adenosyl-L-methionine_pos | 15.000 |
| 399.300 | 199.400 | 5.0 | 1,25-Dihydroxyvitamin D3_pos | 21.800 |
| 416.300 | 85.000 | 5.0 | 3-Hydroxyhexadecanoylcarnitine_pos | 35.830 |
| 428.370 | 85.000 | 5.0 | Octadecanoylcarnitine_pos | 32.200 |
| 429.000 | 411.000 | 5.0 | 24,25-Dihydrolanosterol_pos | 17.000 |
| 440.300 | 85.000 | 5.0 | 3-Hydroxylinoleylcarnitine_pos | 35.830 |
| 442.400 | 85.000 | 5.0 | 3-Hydroxyoleoylcarnitine_pos | 35.830 |
| 448.300 | 85.000 | 5.0 | Arachidonyl carnitine_pos | 40.000 |
| 460.000 | 313.000 | 5.0 | 5-Methyltetrahydrofolic acid_pos | 19.000 |
| 464.700 | 264.300 | 5.0 | Ceramide(d18:1/12:0)_pos | 40.000 |
| 508.000 | 136.000 | 5.0 | Adenosine triphosphate_pos | 44.000 |
| 594.400 | 184.100 | 5.0 | Lyso PC(22:0)_pos | 20.000 |
| 620.400 | 184.100 | 5.0 | Lyso PC(24:1)_pos | 20.000 |
| 688.000 | 348.000 | 5.0 | Dephospho-CoA_pos | 28.000 |
| 714.200 | 262.300 | 5.0 | GC (18:2/16:0)_pos | 42.910 |
| 758.510 | 184.000 | 5.0 | PC (16:0/18:2)_pos | 10.000 |
| 760.500 | 575.700 | 5.0 | PS (34:2)_pos | 34.200 |
| 762.500 | 577.700 | 5.0 | PS (34:1)_pos | 34.200 |
| 764.600 | 339.400 | 5.0 | BMP (18:1/16:1)_pos | 36.000 |
| 766.600 | 339.400 | 5.0 | BMP (18:1/16:0)_pos | 36.000 |
| 768.000 | 261.000 | 5.0 | Coenzyme A_pos | 39.000 |
| 816.540 | 627.540 | 5.0 | PG (38:4)_pos | 27.000 |
| 854.000 | 347.000 | 5.0 | Malonyl-CoA_pos | 31.000 |
| 862.600 | 264.400 | 5.0 | DHC (18:1/16:0)_pos | 65.000 |
| 880.740 | 184.000 | 5.0 | PC (18:1/22:6)_pos | 20.000 |
| 1024.700 | 264.400 | 5.0 | THC 18:1/16:0_pos | 75.000 |
| 1052.700 | 264.400 | 5.0 | THC 18:1/18:0_pos | 75.000 |
| 1080.700 | 264.400 | 5.0 | THC 18:1/20:0_pos | 75.000 |
| 1108.800 | 264.400 | 5.0 | THC 18:1/22:0_pos | 75.000 |
| 1134.800 | 264.400 | 5.0 | THC 18:1/24:1_pos | 75.000 |
| 1136.800 | 264.400 | 5.0 | THC 18:1/24:0_pos | 75.000 |
| 124.000 | 106.000 | 5.0 | 2-Picolinic acid_pos | 15.100 |
| 131.190 | 72.000 | 5.0 | Agmatine_pos | 21.200 |
| 184.001 | 125.000 | 5.0 | Phosphorylcholine_pos | 23.000 |
| 198.100 | 180.100 | 5.0 | Metanephrine_pos | 13.000 |
| 225.200 | 208.300 | 5.0 | Hydroxykynurenine_pos | 14.000 |
| 245.000 | 129.000 | 5.0 | N-acetyl spermine_pos | 20.000 |
| 252.000 | 136.000 | 5.0 | Deoxyadenosine_pos | 20.000 |
| 255.000 | 123.001 | 5.0 | Nicotinamide Riboside_pos | 18.000 |
| 284.100 | 135.000 | 5.0 | guanosine_pos | 35.000 |
| 288.300 | 85.000 | 5.0 | Octanoylcarnitine_pos | 35.830 |
| 220.083 | 43.000 | 5.0 | Pantothenic acid_auto (3) | 47 |

MRM transitions in negative ion mode. Where “auto” in the name indicates that the transition was optimised using the instrument software, and “manual” indicates it was developed manually through direct infusion of pure standards. “principal” and “qualifier” designate the quantifier and qualifier ion transitions, respectively. CE values are negative for negative ion mode.

| **Q1 (m/z)** | **Q3 (m/z)** | **Dwell (ms)** | **Metabolite name** | **CE (V)** |
| --- | --- | --- | --- | --- |
| 73.000 | 55.000 | 5.0 | Propionic acid_neg | -20.000 |
| 75.000 | 45.200 | 5.0 | Glycolic acid_neg | -14.000 |
| 87.000 | 87.000 | 5.0 | Pyruvic acid_neg | -10.000 |
| 89.080 | 43.200 | 5.0 | L-Lactic acid_neg | -16.000 |
| 101.000 | 57.200 | 5.0 | 2-Ketobutyric acid_neg | -13.000 |
| 101.000 | 57.000 | 5.0 | Acetoacetic acid_neg | -14.700 |
| 103.000 | 59.000 | 5.0 | Malonic acid_neg | -13.750 |
| 103.040 | 59.100 | 5.0 | 3-hydroxybutyrate_neg | -20.000 |
| 105.000 | 75.000 | 5.0 | Glyceric acid_neg | -15.000 |
| 107.000 | 77.200 | 5.0 | p-Cresol_neg | -25.800 |
| 111.000 | 42.000 | 5.0 | Uracil_neg | -22.000 |
| 115.050 | 87.000 | 5.0 | Alpha-ketoisovaleric acid_neg | -13.000 |
| 116.001 | 74.300 | 5.0 | Guanidoacetic acid_neg | -15.000 |
| 117.000 | 71.000 | 5.0 | 2-Hydroxy-3-methylbutyric acid_neg | -17.000 |
| 117.002 | 73.100 | 5.0 | Methylmalonic acid_neg | -13.000 |
| 117.090 | 73.000 | 5.0 | Succinic acid_neg | -14.000 |
| 118.000 | 74.000 | 5.0 | L-Threonine_neg | -14.200 |
| 124.000 | 80.000 | 5.0 | Taurine_neg | -29.700 |
| 128.000 | 82.100 | 5.0 | Pyroglutamic acid_neg | -16.800 |
| 129.000 | 85.300 | 5.0 | Itaconic acid_neg | -12.610 |
| 129.003 | 85.100 | 5.0 | Citraconic acid_neg | -13.000 |
| 129.005 | 101.300 | 5.0 | 2-Ketohexanoic acid_neg | -13.000 |
| 129.060 | 85.000 | 5.0 | Ketoleucine_neg | -12.000 |
| 130.000 | 88.000 | 5.0 | N-Acetyl-L-alanine_neg_(qualifier) | -14.000 |
| 131.010 | 87.000 | 5.0 | Oxaloacetic acid_neg | -12.800 |
| 132.030 | 88.080 | 5.0 | L-Aspartic acid_neg | -18.200 |
| 133.000 | 115.000 | 5.0 | Malic acid_neg | -15.000 |
| 135.000 | 92.000 | 5.0 | Hypoxanthine_neg | -18.000 |
| 136.000 | 92.000 | 5.0 | Anthranilate_neg | -18.000 |
| 137.000 | 93.000 | 5.0 | 4-Hydroxybenzoic acid_neg | -20.000 |
| 139.000 | 79.000 | 5.0 | Acetylphosphate_neg | -24.000 |
| 145.000 | 101.000 | 5.0 | a-ketoglutarate_neg_(qualifier) | -13.000 |
| 145.004 | 101.000 | 5.0 | Phenylpropiolic acid_neg | -18.000 |
| 145.020 | 101.000 | 5.0 | a-ketoglutarate_neg_(principal) | -10.700 |
| 146.050 | 116.000 | 5.0 | N-acetylserine_neg | -14.100 |
| 147.001 | 85.100 | 5.0 | Citramalic acid_neg | -17.000 |
| 147.070 | 59.000 | 5.0 | Mevalonic acid_neg | -16.700 |
| 147.100 | 128.700 | 5.0 | 2-Hydroxyglutarate_neg | -17.000 |
| 149.002 | 105.000 | 5.0 | 3-methylphenylacetic acid_neg | -12.000 |
| 151.040 | 107.000 | 5.0 | p-Hydroxyphenylacetic acid_neg | -18.000 |
| 151.110 | 108.000 | 5.0 | Xanthine_neg | -23.000 |
| 153.000 | 109.000 | 5.0 | 2,3-dihydroxybenzoic acid_neg | -19.000 |
| 155.000 | 111.000 | 5.0 | Orotic acid_neg | -16.000 |
| 156.000 | 112.000 | 5.0 | Tiglylglycine_neg | -14.000 |
| 157.000 | 113.800 | 5.0 | Allantoin_neg | -18.620 |
| 160.000 | 142.000 | 5.0 | Aminoadipic acid_neg | -16.000 |
| 160.100 | 116.200 | 5.0 | Indole-3-carboxylic acid_neg | -18.500 |
| 163.000 | 91.000 | 5.0 | Phenylpyruvate_neg | -13.000 |
| 165.050 | 147.000 | 5.0 | Phenyllactic acid_neg | -16.800 |
| 166.000 | 122.000 | 5.0 | Quinolinic Acid_neg | -12.000 |
| 167.000 | 123.000 | 5.0 | Homogentisic acid_neg | -23.000 |
| 167.110 | 124.000 | 5.0 | Uric acid_neg | -20.000 |
| 171.000 | 79.000 | 5.0 | Glycerol 3-phosphate_neg | -29.900 |
| 173.000 | 111.000 | 5.0 | Suberic Acid_neg | -19.190 |
| 173.050 | 85.000 | 5.0 | aconitic acid_neg_(qualifier) | -17.000 |
| 173.110 | 129.000 | 5.0 | aconitic acid_neg_(principal) | -11.500 |
| 173.150 | 93.000 | 5.0 | Shikimic acid_neg | -18.000 |
| 173.200 | 131.000 | 5.0 | Arginine_neg | -19.100 |
| 174.000 | 131.000 | 5.0 | Citrulline_neg_(qualifier) | -19.100 |
| 175.001 | 87.000 | 5.0 | Ascorbic acid_neg | -19.000 |
| 175.002 | 115.000 | 5.0 | 2-Isopropylmalic acid_neg | -19.000 |
| 175.030 | 132.000 | 5.0 | N-carbamoyl-L-aspartate_neg | -13.000 |
| 177.000 | 129.000 | 5.0 | Gluconolactone_neg | -13.000 |
| 177.900 | 133.900 | 5.0 | Hippuric acid_neg | -16.000 |
| 179.160 | 161.000 | 5.0 | Myo-inositol_neg | -17.000 |
| 181.040 | 135.040 | 5.0 | 4-Hydroxyphenyllactic acid_neg | -23.900 |
| 181.100 | 137.100 | 5.0 | Homovanillic acid_neg | -12.000 |
| 182.000 | 80.000 | 5.0 | homocysteic acid_neg | -23.000 |
| 182.003 | 138.000 | 5.0 | 4-Pyridoxic acid_neg | -18.000 |
| 185.000 | 97.000 | 5.0 | 3-Phosphoglyceric acid_neg | -15.000 |
| 186.000 | 142.030 | 5.0 | Indoleacrylic acid_neg | -20.000 |
| 187.100 | 125.100 | 5.0 | Azelaic acid _neg | -21.600 |
| 188.000 | 144.000 | 5.0 | Kynurenic acid_neg | -21.000 |
| 188.100 | 127.800 | 5.0 | N-Acetylglutamic acid_neg | -16.840 |
| 191.000 | 111.000 | 5.0 | Citric+isocitric acid_neg | -19.000 |
| 193.000 | 103.000 | 5.0 | 2-Keto-L-gluconate_neg | -12.000 |
| 193.100 | 148.900 | 5.0 | p-Aminohippuric acid_neg | -16.000 |
| 194.100 | 150.000 | 5.0 | Salicyluric acid_neg | -20.000 |
| 195.000 | 129.000 | 5.0 | Gluconic acid_neg | -15.000 |
| 201.100 | 139.000 | 5.0 | Sebacic acid_neg | -23.390 |
| 204.000 | 160.000 | 5.0 | Cinnamoylglycine_neg | -13.640 |
| 204.001 | 160.000 | 5.0 | Xanthurenic acid_neg | -19.000 |
| 205.000 | 125.000 | 5.0 | 2-Methylcitric acid_neg | -19.000 |
| 209.000 | 85.000 | 5.0 | Glucaric acid_neg | -16.000 |
| 212.000 | 132.000 | 5.0 | Indoxyl sulfate_neg | -24.600 |
| 213.000 | 79.000 | 5.0 | Deoxyribose phosphate_neg | -33.000 |
| 218.000 | 146.000 | 5.0 | Pantothenic acid_neg | -19.000 |
| 239.300 | 120.000 | 5.0 | Cystine_neg_(qualifier) | -17.000 |
| 242.910 | 42.100 | 5.0 | Uridine_neg | -52.000 |
| 243.060 | 42.100 | 5.0 | Pseudouridine_neg | -52.000 |
| 246.040 | 97.000 | 5.0 | Pyridoxal 5-phosphate_neg | -25.620 |
| 251.000 | 135.000 | 5.0 | deoxyinosine_neg | -21.000 |
| 258.100 | 128.000 | 5.0 | Gamma-glutamyl-Leucine_neg | -21.000 |
| 259.010 | 241.000 | 5.0 | glucose-1-phosphate_neg | -16.000 |
| 263.100 | 127.100 | 5.0 | Phenylacetylglutamine_neg | -28.200 |
| 267.000 | 135.000 | 5.0 | Inosine_neg | -27.000 |
| 279.400 | 59.000 | 5.0 | Linoleic acid_neg | -40.000 |
| 281.940 | 150.200 | 5.0 | Guanosine_neg | -28.160 |
| 282.700 | 151.000 | 5.0 | Xanthosine_neg | -33.890 |
| 289.040 | 97.000 | 5.0 | Sedoheptulose monophosphate_neg | -27.000 |
| 298.070 | 97.000 | 5.0 | 4-phosphopantothenate_neg | -18.000 |
| 302.200 | 258.000 | 5.0 | Eicosapentaenoic acid_neg | -19.170 |
| 303.200 | 259.500 | 5.0 | Arachidonic Acid_neg | -21.500 |
| 319.000 | 179.000 | 5.0 | 12-HETE_neg | -20.000 |
| 323.100 | 79.000 | 5.0 | Uridine 5-monophosphate_neg | -89.000 |
| 327.000 | 309.000 | 5.0 | Tetranor-PGEM_neg | -16.000 |
| 327.400 | 283.400 | 5.0 | Docosahexaenoic acid_neg | -19.800 |
| 329.000 | 311.000 | 5.0 | Tetranor-PGFM_neg | -18.000 |
| 333.000 | 189.000 | 5.0 | Prostaglandin J2_neg | -24.000 |
| 337.000 | 167.000 | 5.0 | 11,12-DiHETrE_neg | -25.000 |
| 337.000 | 145.000 | 5.0 | 5,6-DHET_neg | -24.000 |
| 341.290 | 179.000 | 5.0 | Hexose Disaccharide Pool_neg | -20.000 |
| 353.000 | 309.000 | 5.0 | PGF2alpha_neg | -26.000 |
| 359.200 | 188.900 | 5.0 | Aldosterone_neg | -26.000 |
| 367.000 | 323.000 | 5.0 | Orotidine monophosphate _neg | -16.000 |
| 367.200 | 305.000 | 5.0 | 11-Dehydro-thromboxane B2_neg | -22.000 |
| 369.000 | 97.000 | 5.0 | Androsterone sulfate_neg | -37.000 |
| 378.200 | 79.100 | 5.0 | Sphingosine 1-phosphate_neg | -80.000 |
| 389.000 | 291.000 | 5.0 | 5-phosphoribosyl-1-pyrophosphate_neg | -20.000 |
| 391.202 | 345.200 | 5.0 | Deoxycholic acid_neg | -36.000 |
| 395.400 | 377.400 | 5.0 | Hexacosanoic acid_neg | -41.700 |
| 399.000 | 97.000 | 5.0 | OBP_neg | -37.000 |
| 401.000 | 159.000 | 5.0 | Deoxythymidine diphosphate_neg_(qualifier) | -27.000 |
| 401.000 | 79.000 | 5.0 | Deoxythymidine diphosphate_neg (principal) | -100.000 |
| 402.000 | 384.000 | 5.0 | Cytidine diphosphate_neg_(principal) | -22.000 |
| 402.000 | 79.000 | 5.0 | Cytidine diphosphate_neg_(qualifier) | -100.000 |
| 403.000 | 159.000 | 5.0 | Uridine 5-diphosphate_neg | -28.000 |
| 407.200 | 345.200 | 5.0 | Cholic acid_neg | -32.000 |
| 424.040 | 302.000 | 5.0 | Thiamine pyrophosphate_neg | -21.000 |
| 426.000 | 346.000 | 5.0 | Adenosine phosphosulfate_neg_(qualifier) | -22.000 |
| 426.010 | 346.010 | 5.0 | Adenosine phosphosulfate_neg_(principal) | -20.000 |
| 426.100 | 159.000 | 5.0 | Adenosine diphosphate_neg | -27.000 |
| 426.120 | 159.000 | 5.0 | Deoxyguanosine diphosphate_neg | -27.000 |
| 427.000 | 159.000 | 5.0 | Inosine diphosphate_neg | -27.000 |
| 448.300 | 74.000 | 5.0 | Chenodeoxyglycocholic acid_neg | -54.000 |
| 462.100 | 79.000 | 5.0 | Adenylsuccinic acid_neg | -46.000 |
| 464.300 | 74.000 | 5.0 | Glycocholic acid_neg | -60.000 |
| 465.300 | 97.000 | 5.0 | Cholesteryl sulfate_neg | -39.000 |
| 467.000 | 159.000 | 5.0 | Deoxyuridine triphosphate_neg | -27.000 |
| 472.200 | 315.000 | 5.0 | N5-Formyl-THF_neg | -40.000 |
| 482.000 | 79.000 | 5.0 | Cytidine triphosphate_neg | -108.000 |
| 498.200 | 124.000 | 5.0 | Taurodeoxycholic acid Pool_neg | -53.000 |
| 507.000 | 79.000 | 5.0 | Inosine triphosphate_neg | -106.000 |
| 514.300 | 80.000 | 5.0 | Taurocholic acid_neg | -90.000 |
| 522.000 | 79.000 | 5.0 | Guanosine triphosphate_neg | -110.000 |
| 579.000 | 403.000 | 5.0 | Uridine diphosphate glucuronic acid_neg | -24.000 |
| 685.800 | 79.000 | 5.0 | SM(d18:1/16:1)_neg | -100.000 |
| 686.500 | 253.200 | 5.0 | PE(32:2)_neg | -48.000 |
| 687.800 | 79.000 | 5.0 | SM(d18:1/16:0)_neg | -50.000 |
| 688.500 | 227.200 | 5.0 | PE(32:1)_neg | -48.000 |
| 703.800 | 79.000 | 5.0 | SM(d18:1/16:0 OH)_neg | -50.000 |
| 713.800 | 79.000 | 5.0 | SM(d18:1/18:1)_neg | -50.000 |
| 715.800 | 79.000 | 5.0 | SM(d18:1/18:0)_neg | -100.000 |
| 716.500 | 255.200 | 5.0 | PE(34:1) _neg | -48.000 |
| 717.500 | 253.200 | 5.0 | PG(32:2)_neg | -48.000 |
| 722.500 | 303.000 | 5.0 | Plasmalogen(p16:0/20:4)_neg | -48.000 |
| 739.800 | 79.000 | 5.0 | SM(d18:1/20:2)_neg | -100.000 |
| 741.800 | 79.000 | 5.0 | SM(d18:1/20:1)_neg | -100.000 |
| 743.800 | 79.000 | 5.0 | SM(d18:1/20:0)_neg | -100.000 |
| 744.500 | 281.300 | 5.0 | PE(36:1)_neg | -50.000 |
| 745.500 | 253.200 | 5.0 | PG(34:2)_neg | -48.000 |
| 747.600 | 255.200 | 5.0 | PG(34:1)_neg | -48.000 |
| 766.000 | 79.100 | 5.0 | CoA_neg | -134.100 |
| 769.020 | 279.200 | 5.0 | CL(18:2/18:2/18:2/22:6)_neg | -50.000 |
| 769.800 | 79.000 | 5.0 | SM(d18:1/22:1)_neg | -100.000 |
| 771.800 | 79.000 | 5.0 | SM(d18:1/22:0)_neg | -50.000 |
| 783.800 | 79.000 | 5.0 | SM(d18:1/22:2 OH)_neg | -100.000 |
| 788.600 | 283.300 | 5.0 | PS(18:0/18:1)_neg | -60.000 |
| 795.800 | 79.000 | 5.0 | SM (d18:1/24:2)_neg | -50.000 |
| 797.800 | 79.000 | 5.0 | SM(d18:1/24:1)_neg | -100.000 |
| 799.800 | 79.000 | 5.0 | SM(d18:1/24:0)_neg | -100.000 |
| 809.600 | 255.200 | 5.0 | PI(16:0/16:0)_neg | -62.000 |
| 810.600 | 303.200 | 5.0 | PS(18:0/20:4)_neg | -60.000 |
| 811.800 | 79.000 | 5.0 | SM(d18:1/24:2 OH)_neg | -50.000 |
| 813.800 | 79.000 | 5.0 | SM(d18:1/25:0) or SM(d18:1/24:1 OH)_neg | -100.000 |
| 815.800 | 79.000 | 5.0 | SM(d18:1/24:0 OH)_neg | -50.000 |
| 823.800 | 79.000 | 5.0 | SM(d18:1/26:2)_neg | -100.000 |
| 833.600 | 253.200 | 5.0 | PI(34:2)_neg | -62.000 |
| 835.600 | 281.300 | 5.0 | PI(34:1)_neg | -62.000 |
| 837.700 | 255.200 | 5.0 | PI(34:0)_neg | -62.000 |
| 839.800 | 79.000 | 5.0 | SM(d18:1/26:2 OH)_neg | -100.000 |
| 841.800 | 79.000 | 5.0 | SM(d18:1/26:1 OH)_neg | -50.000 |
| 843.800 | 79.000 | 5.0 | SM(d18:1/26:0 OH)_neg | -100.000 |
| 857.500 | 255.200 | 5.0 | PI(36:4)_neg | -65.000 |
| 861.700 | 281.300 | 5.0 | PI(36:2)_neg | -62.000 |
| 863.700 | 281.300 | 5.0 | PI(36:1)_neg | -62.000 |
| 865.700 | 283.300 | 5.0 | PI(36:0)_neg | -62.000 |
| 883.600 | 281.300 | 5.0 | PI(38:5)_neg | -65.000 |
| 885.600 | 283.300 | 5.0 | PI(38:4)_neg | -65.000 |
| 887.600 | 283.300 | 5.0 | PI(38:3)_neg | -65.000 |
| 911.600 | 283.300 | 5.0 | PI(40:5)_neg | -65.000 |
| 121.020 | 77.040 | 5.0 | Benzoic acid_neg | -20.000 |
| 75.000 | 32.100 | 5.0 | Glycolic acid_manual(1) | -60.000 |
| 75.000 | 40.600 | 5.0 | Glycolic acid_manual(2) | -60.000 |
| 75.000 | 42.100 | 5.0 | Glycolic acid_manual(3) | -60.000 |
| 75.000 | 44.800 | 5.0 | Glycolic acid_manual(4) | -60.000 |
| 74.961 | 46.900 | 5.0 | Glycolic acid_auto(1) | -14.000 |
| 74.961 | 44.900 | 5.0 | Glycolic acid_auto(2) | -14.000 |
| 74.961 | 56.700 | 5.0 | Glycolic acid_auto(3) | -18.000 |
| 177.000 | 59.000 | 5.0 | Gluconolactone_manual(1) | -40.000 |
| 177.000 | 70.700 | 5.0 | Gluconolactone_manual(2) | -40.000 |
| 177.000 | 75.000 | 5.0 | Gluconolactone_manual(3) | -40.000 |
| 177.000 | 119.200 | 5.0 | Gluconolactone_manual(4) | -40.000 |
| 177.000 | 41.000 | 5.0 | Gluconolactone_manual(5) | -40.000 |
| 176.926 | 128.700 | 5.0 | Gluconolactone_auto(1) | -12.000 |
| 176.926 | 98.900 | 5.0 | Gluconolactone_auto(2) | -16.000 |
| 176.926 | 84.900 | 5.0 | Gluconolactone_auto(3) | -16.000 |

**SM 1. Sample identifier reconciliation**

The clinical sheet used SZ-{N} IDs while metabolite tables used Sc-F{N}{letter}_KB-1 IDs (where F = "female" or M = "male", letter = sub-batch code, KB-1 = injection batch tag). Reconciliation was performed by manual lookup using a sample-tracking log; one SCZ sample had a clinical ID that could not be matched and was retained for SCZ-vs-Control comparisons but dropped from clinical-scale correlation analyses.

**SM 2. BF10 recomputation and provenance**

Two of the author-supplied files reported divergent BF10 values for phosphorylcholine (131.7 vs 1331.7). We recomputed BF₁₀ from the raw QC-normalised values using the standard Rouder default-prior Cauchy formulation (scale = √2/2, two-sided alternative), implemented via pingouin.bayesfactor_ttest. Our value (132 ≈ 1.3 × 10²) matches the lower of the two author-supplied estimates and is treated as authoritative in Table 1 and throughout the main text.

**SM 3. KNN imputation sensitivity analysis**

Nine metabolites with 5–20% missingness were imputed by KNN (k = 3, within-group). For each of the top 20 metabolites in Table 1, we re-ran the Welch + Cohen’s d analysis without imputation (complete-case only) to assess sensitivity. All effect sizes were within ±0.05 of the imputed-data estimate, and no metabolite changed FDR-status. Detail recorded in Master_Data_QCnorm sheet (imputation flag column).

**SM 4. Pareto vs raw QC-normalised scaling**

Two parallel scaled tables are retained:

- QC-normalised (Master_Data_QCnorm): per-feature scaling such that the QC-pool mean = 1. Used for natural-scale effect-size reporting (raw means, raw differences).
- Pareto-scaled(Master_Data_Pareto): mean-centred, divided by √ (feature SD). Used for all PCA, PLS-DA, classifier and network analyses. Pareto scaling de-emphasises high-magnitude features without fully equalising contributions (as autoscaling would) and is the convention in our prior work.

All Cohen’s d and adjusted-β values in Tables 2 and 3 are reported on the QC-normalised scale.

**SM 5. Bayes factor and Cohen’s d bootstrap details**

Cohen’s d 95% confidence intervals were computed by 5,000-iteration percentile bootstrap, using scipy.stats.bootstrap. BF₁₀ for the Welch test was computed using the Rouder default Cauchy prior on standardised effect size (scale parameter = √2 / 2). For BF₁₀ > 10,000 we report the value as 1.3 × 10⁴ rather than its raw scalar to avoid implying precision beyond what the prior calibration supports.

**SM 6. PLS-DA permutation null**

PLS-DA was fitted with two components on the 153-metabolite panel (Methods §2.3: 18 metabolites with ≥20% missingness dropped, followed by within-group KNN imputation with k = 3) using scikit-learn PLSRegression. PLSCanonical is mathematically equivalent for a binary outcome but raises a ValueError at n_components = 2 because the cross-covariance rank is min(n, p, q) = 1 for a univariate response, so PLSRegression is the operative implementation. For each of 1,000 permutations of the group label (np.random.default_rng seed = 42), the explained Y variance R²(Y) and a 5-fold cross-validated Q²(Y) were recomputed. The observed R²Y = 0.476 exceeded all 1,000 permuted values (null mean 0.252, null max 0.457; 99.9th percentile 0.419) and the observed Q²Y = +0.315 likewise exceeded all 1,000 permuted values (null mean −0.490, null max +0.101; 99.9th percentile +0.059), yielding p < 0.001 for both metrics (computed as (1 + #{null ≥ obs}) / (1 + n_perm)). The permutation null distributions are shown stacked as Figure 2b. A second seed (2024) reproduced identical conclusions (0/1000 permuted R²Y or Q²Y values reached the observed values).

**SM 7. LASSO regularisation regimes**

LASSO logistic regression was implemented in scikit-learn LogisticRegressionCV with L1 penalty under stratified 5-fold cross-validation. Two regimes were retained:

- default λ: chosen by the standard 1-SE rule. Median feature retention across folds was ~32.
- sparse λ: λ pushed by a factor of 10× above the 1-SE value to retain a minimal feature set. Median retention ~4.

Random-Forest used 500 trees, max_features = √(p), min_samples_leaf = 3. Permutation p-values for all classifiers were computed by 1,000 permutations of the group label, with the full CV pipeline rerun on each permutation.

**SM 8. Correlation network FDR thresholds**

Within-group Spearman correlations (n = 14,535 pairs across 171 metabolites) were FDR-corrected (BH) within each group. The retention threshold for edge inclusion was |ρ| ≥ 0.5 and FDR < 0.05 within at least one group. The differential-correlation Fisher-z statistic was computed on raw ρ values (not on the thresholded set) and BH-corrected across all 5,779 edges entering the union network.

**SM 9. Differential correlation analysis**

Spearman rank correlations were computed separately within the SCZ (n = 41) and control (n = 40) groups on pairwise complete observations (minimum 10 valid pairs). For each metabolite pair, the Fisher z-transformed correlations were compared by two-sided z-test with standard error √(1/(n₁−3) + 1/(n₂−3)). The analysis was restricted to metabolite pairs within and between the three metabolic axes (disease: 12 metabolites, drug: 7, severity: 6), yielding approximately 300 tests. Benjamini–Hochberg FDR was applied within each axis; uncorrected p-values are also reported given the modest sample size.

**SM 10. KEGG / SMPDB enrichment background**

Of the 171 cleaned-panel metabolites, 126 could be mapped to one or more KEGG compound IDs and were retained as the panel-detectable background. Hypergeometric over-representation was computed against this background (not against the full KEGG metabolome). Permutation enrichment used 1,000 permutations of metabolite labels in the panel-detectable background.

**SM 11. STRING and OpenTargets details**

STRING v12 was queried via the public REST API with species = 9606, score ≥ 0.7 (high-confidence) and network_type = full. Leiden community detection was run with ModularityVertexPartition and seed = 42 (modularity Q = 0.391; 4 modules). OpenTargets was queried via the public GraphQL API with the schizophrenia MONDO ID MONDO_0005090; the composite score field on the associatedTargets connection was used as the SCZ-association evidence.

**SM 12. Partial Spearman correlations**

Partial Spearman correlations were computed by (i) regressing each metabolite on the covariate set (sex, age, smoking, CPZeq) via robust linear regression and extracting residuals; (ii) regressing each clinical scale on the same covariate set and extracting residuals; (iii) computing Spearman correlation between the residualised metabolite and the residualised clinical scale. FDR was applied per scale (and a global FDR over all 2,052 tests was also reported for transparency).

**SM 13. Sex confounding in the positive-vs-negative symptom contrast**

The positive-symptom subgroup contained 22 male / 5 female patients (81% male); the negative-symptom subgroup contained 1 male / 13 female (93% female). This near-complete sex confounding makes the positive-vs-negative effect-size estimates unreliable as direct readouts of symptom-domain biology. We report the contrast with explicit warnings and apply sex-adjustment in confirmatory models, but caution against any biological interpretation without an explicit sex-balanced replication.

**SM 14. Software versions**

- Python 3.11
- pandas 2.2, numpy 1.26
- scikit-learn 1.5
- scipy 1.13, statsmodels 0.14
- pingouin 0.5
- networkx 3.3, python-louvain 0.16, leidenalg 0.10
- matplotlib 3.9, seaborn 0.13
- graphviz 0.21 (with system graphviz 2.42)
- requests 2.32 (for KEGG / STRING / OpenTargets REST queries)

**SM 15. Reproducibility**

The full master workbook (Manuscript_Data_and_Results.xlsx, 13 sheets) plus the per-figure intermediate CSVs and the Jupyter execution trace are sufficient to regenerate every result in this manuscript. The trace also contains the exact KEGG, STRING and OpenTargets query strings used, with a timestamp record of the retrieval date.

**Supplementary References**

[1]Li K., Naviaux J.C., Bright A.T., Wang L., Naviaux R.K. A robust, single-injection method for targeted, broad-spectrum plasma metabolomics. Metabolomics. 2017;13:122. doi: 10.1007/s11306-017-1264-1. PMID: 28943831.
