# Supplementary material
Source: Research Square preprint supplement (doi:10.21203/rs.3.rs-10343202/v1)
Supplement: Supplementary file 3 [file 5c808e33392f30459a10c558.xlsx]

## Sheet: Master_Data_QCnorm
Sample	Group	Urea	Methylguanidine	Glycine	Trimethylamine-N-oxide	Sarcosine	Alanine	beta-Alanine	Dimethylglycine	3-Aminoisobutyric acid	L-Serine	Hypotaurine	Histamine	Creatinine	L-Proline	Betaine	Guanidinoacetic acid	Indole	L-Valine	Threonine	Purine	Pipecolic acid	N-acetyl-L-alanine_(principal)	Creatine	Hydroxyproline	L-leucine + L-Isoleucine	Ornithine	Methylcysteine	Homocysteine	Adenine	1-Methylnicotinamide	O-Phosphoethanolamine	Acetylcholine	L-Glutamine	L-Lysine	L-Glutamic acid	L-Methionine	L-Histidine	DL-2-Aminooctanoic acid	L-Carnitine	7-methylguanine	Methionine sulfoxide	L-Phenylalanine	1-Methylhistidine	arginine	N-Acetylornithine	Citrulline_(principal)	Serotonin	L-Tyrosine
Contr-1-KB-1	Control	371000	1230000	550000	333000	11000000	9940000	1590000	1160000	243000	3150000	1090000		3020000	56500000	30600	45200000	300000	2470000	8540000	104000	42600000	21000000	24900000	595000	77000000	280000	1240000	193000	83400	69900		986000	61600000	62400000	1580000	3160000	9190000	131000	31500000	147000	135000	4800000	953000	1620000	283000	9450000	479000	1850000
Contr-10-KB-1	Control	490000	1150000	551000	41500	18500000	17400000	1910000	1210000	338000	2590000	1210000	47900	4460000	62800000	54500	95100000	643000	4990000	8440000	319000	58800000	16200000	18600000	599000	140000000	315000	1880000	211000	191000	111000		1360000	82600000	90500000	1710000	3890000	13700000	271000	51900000	235000	103000	10000000	1240000	1640000	654000	12000000	541000	3600000
Contr-11-KB-1	Control	492000	1670000	701000	56000	28100000	26800000	2290000	1910000	505000	3290000	732000	54300	6190000	92100000	70500	87900000	607000	4500000	15500000	439000	86500000	37700000	44200000	1250000	119000000	696000	2630000	101000	272000	230000		1920000	113000000	136000000	4300000	4910000	10700000	312000	78000000	323000	208000	15800000	1460000	2270000	715000	15100000	641000	4970000
Contr-12-KB-1	Control	525000	2270000	1340000	67100	34400000	38100000	2620000	1380000	401000	3740000	921000	37500	7030000	153000000	65400	81500000	921000	4790000	13600000	467000	124000000	24700000	30500000	2180000	137000000	307000	3960000	138000	238000	367000	6690	623000	147000000	166000000	4600000	5560000	8120000	346000	70600000	482000	206000	16600000	1930000	2480000	492000	18100000	845000	4320000
Contr-13-KB-1	Control	634000	1890000	1160000	71400	35000000	37600000	2510000	4570000	436000	7520000	787000	56800	6910000	130000000	144000	143000000	1280000	7150000	21500000	692000	123000000	43800000	53700000	747000	193000000	853000	4440000	106000	331000	318000		1330000	165000000	183000000	5750000	10400000	12600000	383000	69200000	209000	325000	31400000	1820000	4310000	862000	16700000	969000	7850000
Contr-14-KB-1	Control	1020000	1700000	984000	36700	29800000	33000000	2750000	2810000	339000	5930000	847000		4440000	159000000	183000	131000000	1100000	6850000	16200000	803000	102000000	48100000	60200000	1630000	221000000	578000	5870000	69000	410000	120000	8300	2120000	132000000	136000000	4570000	7770000	11000000	259000	61600000	257000	228000	28500000	1820000	3080000	775000	13600000	653000	6340000
Contr-15-KB-1	Control	953000	874000	663000	64000	17800000	18900000	2530000	1670000	454000	4010000	775000	78400	4140000	81500000	138000	92100000	1060000	5180000	10900000	538000	81400000	32200000	41000000	1390000	148000000	425000	2450000	44100	247000	120000	7200	1760000	99900000	117000000	3680000	4860000	8270000	408000	60700000	212000	255000	23500000	1270000	1670000	725000	13000000	622000	5000000
Contr-16-KB-1	Control	950000	2110000	1390000	101000	28900000	30700000	2670000	2400000	368000	8750000	915000	46500	5210000	166000000	296000	112000000	1100000	5900000	32300000	378000	134000000	31700000	38600000	2990000	155000000	719000	3470000	31800	203000	150000	5990	1710000	178000000	197000000	6110000	9490000	7790000	303000	59000000	236000	284000	20200000	1730000	2200000	749000	20600000	902000	4490000
Contr-17-KB-1	Control	619000	1700000	782000	99500	23400000	24700000	2490000	1610000	341000	3320000	800000		5990000	78400000	154000	83400000	792000	4080000	9280000	309000	76600000	40200000	47000000	983000	123000000	537000	1990000	23900	160000	235000	5150	2400000	95000000	116000000	3540000	3940000	6030000	391000	92800000	235000	108000	13900000	1300000	1090000	674000	8110000	527000	3160000
Contr-18-KB-1	Control	937000	1950000	582000	81800	33900000	36100000	2480000	2720000	383000	3290000	903000	79300	7270000	102000000	159000	126000000	922000	7000000	11800000	404000	88700000	40700000	47400000	2270000	174000000	505000	2570000	48700	218000	345000	11000	1380000	115000000	129000000	4190000	5270000	5860000	334000	102000000	252000	124000	20100000	1820000	1770000	679000	12900000	600000	5190000
Contr-19-KB-1	Control	792000	2440000	705000	26200	21100000	24200000	2450000	2230000	390000	4320000	713000	31900	3800000	67000000	139000	69000000	692000	3850000	10900000	243000	105000000	14300000	16600000	861000	101000000	672000	2200000	28100	136000	147000	7460	1350000	120000000	138000000	3890000	4240000	5920000	914000	53900000	201000	148000	14400000	1280000	1470000	710000	16200000	927000	3930000
Contr-2-KB-1	Control	360000	1090000	354000	67100	12700000	12400000	1460000	1120000	330000	2510000	1390000	36200	2770000	46400000	58800	56000000	226000	2860000	5440000	123000	42200000	25900000	27200000	736000	78900000	227000	2250000	317000	82600	123000	18500	747000	61900000	67400000	1700000	2970000	8460000	93900	31100000	160000	109000	4750000	838000	1470000	341000	7390000	338000	2320000
Contr-20-KB-1	Control	476000	1400000	464000	92400	26900000	29900000	2700000	1630000	308000	3450000	830000		6900000	116000000	69500	82700000	662000	4500000	10700000	295000	78100000	11200000	13900000	986000	138000000	671000	2510000	30500	243000	118000	12900	1820000	99300000	112000000	2690000	4870000	6420000	583000	57000000	230000	192000	15000000	1500000	1340000	676000	13600000	683000	5000000
Contr-21-KB-1	Control	665000	1020000	597000	31500	27200000	27900000	2200000	1970000	385000	5460000	764000	36100	8140000	196000000	88100	84200000	1070000	4360000	19000000	310000	124000000	8030000	10400000	1910000	135000000	495000	3350000	22400	226000	206000		2010000	128000000	154000000	3490000	6720000	6340000	970000	51000000	182000	125000	10600000	2310000	3790000	924000	19900000	819000	4820000
Contr-22-KB-1	Control	885000	1200000	997000	36300	25200000	25000000	2090000	2410000	357000	4870000	601000		5050000	128000000	124000	85500000	883000	4920000	12200000	237000	127000000	18400000	22200000	2720000	129000000	312000	4350000	20500	241000	305000	9960	1640000	147000000	164000000	3790000	5500000	6300000	831000	56500000	226000	158000	11400000	1840000	1940000	743000	10000000	545000	4880000
Contr-23-KB-1	Control	548000	564000	494000	90000	20800000	18700000	2510000	1330000	343000	3780000	857000	37500	5940000	109000000	156000	58500000	685000	3270000	16100000	184000	95300000	33800000	36200000	746000	78000000	465000	3800000	20500	199000	213000	6620	1480000	118000000	127000000	2500000	4720000	5190000	354000	46000000	239000	284000	7920000	1700000	1760000	985000	21000000	989000	3860000
Contr-24-KB-1	Control	984000	1380000	893000	66700	30200000	31800000	2620000	2280000	375000	5830000	832000	41500	9570000	177000000	135000	109000000	1130000	5890000	22300000	270000	161000000	24400000	28600000	2960000	176000000	656000	3970000	13900	254000	304000	11100	1830000	180000000	212000000	4690000	8160000	8640000	792000	67300000	216000	192000	10500000	2160000	3100000	835000	23100000	854000	7260000
Contr-25-KB-1	Control	951000	1310000	698000	49600	20500000	20000000	2790000	1940000	293000	4750000	789000	58600	6830000	91100000	125000	85000000	907000	4220000	14200000	268000	133000000	36200000	43700000	943000	111000000	445000	3930000	11600	247000	235000	13400	1500000	150000000	172000000	3790000	6090000	6950000	1450000	58000000	232000	145000	9350000	1700000	2460000	761000	26400000	1070000	5640000
Contr-26-KB-1	Control	944000	236000	1100000	64500	27500000	26300000	3250000	2710000	321000	7260000	1140000	60000	785000	205000000	260000	126000000	1180000	6760000	24600000	385000	156000000	62800000	70400000	2650000	202000000	386000	6740000	22900	522000	287000	16900	843000	180000000	197000000	2060000	10200000	2910000	619000	55100000	232000	357000	14900000	757000	4070000	1430000	32900000	1220000	10200000
Contr-27-KB-1	Control	2530000	249000	1080000	160000	63600000	61100000	3480000	4370000	818000	10000000	879000	83600	8630000	375000000	344000	251000000	2380000	13000000	50400000	616000	300000000	104000000	118000000	8220000	346000000	528000	11100000	97300	854000	484000	28300	3680000	378000000	389000000	4040000	20300000	4410000	612000	106000000	618000	656000	29900000	1630000	3000000	2080000	66400000	2570000	16400000
Contr-28-KB-1	Control	1320000	197000	1070000	49000	35000000	35500000	3450000	2300000	441000	9290000	958000	41400	2760000	224000000		211000000	2420000	10600000	28200000	426000	189000000	63300000	73300000	2530000	273000000	370000	11100000	73700	705000	331000	30300	1640000	226000000	254000000	3320000	14900000	3580000	976000	44100000	183000	460000	18100000	823000	1730000	1530000	37500000	1440000	18300000
Contr-29-KB-1	Control	1490000	334000	1210000	71600	41300000	37000000	3370000	6360000	584000	9950000	889000	44000	6730000	259000000	172000	262000000	1870000	13300000	43300000	413000	253000000	44900000	53300000	5350000	384000000	470000	7890000	79000	632000	146000	55800	2680000	322000000	349000000	3460000	16700000	3380000	664000	63900000	404000	517000	18000000	1470000	2990000	2130000	50600000	1800000	14900000
Contr-3-KB-1	Control	387000	2050000	537000	58700	15100000	13600000	1560000	1470000	292000	3320000	1070000		3810000	54400000	64400	60600000	347000	3390000	9450000	159000	45800000	15500000	16900000	844000	95000000	395000	1180000	436000	155000	55000	49500	1120000	71800000	71300000	2190000	4170000	9990000	152000	36800000	129000	117000	5620000	1290000	1240000	330000	8510000	435000	2570000
Contr-30-KB-1	Control	1440000	242000	971000	191000	47900000	47800000	3380000	3470000	460000	8090000	952000	51400	6580000	249000000	361000	192000000	1940000	9990000	22700000	376000	225000000	52200000	64100000	3480000	259000000	455000	8480000	124000	554000	581000	115000	2310000	294000000	326000000	3750000	11900000	3250000	1070000	87600000	383000	399000	16700000	1450000	2170000	2460000	51000000	1780000	12300000
Contr-31-KB-1	Control	1560000	264000	2430000	860000	68100000	64600000	3560000	5850000	396000	14400000	947000	70200	3800000	285000000	432000	226000000	1900000	11000000	55500000	332000	288000000	87100000	95600000	3900000	290000000	273000	11300000	151000	688000	725000	38700	2180000	414000000	452000000	7590000	17900000	2840000	1520000	84900000	331000	459000	17800000	1140000	3700000	2030000	53800000	1970000	16400000
Contr-32-KB-1	Control	1460000	546000	2650000	24000	88100000	88400000	3800000	5790000	481000	15000000	1060000	40600	2390000	351000000	535000	349000000	2300000	18700000	37400000	511000	282000000	79700000	90000000	2720000	529000000	577000	10300000	164000	997000	118000	42900	1700000	420000000	458000000	7870000	21500000	2710000	1330000	73400000	459000	715000	24000000	759000	3880000	2270000	51600000	1890000	26000000
Contr-33-KB-1	Control	1210000	509000	3530000	370000	75500000	72500000	3610000	7340000	611000	28700000	766000	67700	6730000	192000000	368000	223000000	1870000	10700000	88500000	310000	304000000	109000000	126000000	4010000	292000000	614000	10900000	144000	432000	415000	35600	3150000	494000000	529000000	8480000	20800000	3350000	1480000	101000000	507000	543000	15500000	1420000	3940000	2100000	60100000	2080000	15300000
Contr-34-KB-1	Control	1620000	627000	2500000	55400	86900000	81000000	1870000	5870000	297000	19200000	1080000		6990000	248000000	507000	249000000	1800000	12900000	49000000	386000	261000000	66900000	73600000	4150000	318000000	474000	6050000	119000	381000	162000	38200	1850000	401000000	476000000	8910000	16600000	2850000	677000	106000000	602000	455000	21700000	1280000	2680000	833000	51200000	1910000	10600000
Contr-35-KB-1	Control	2330000	756000	3020000	202000	136000000	127000000	3280000	11500000	511000	24500000	842000	102000	7090000	413000000	225000	524000000	2760000	25700000	142000000	326000	277000000	245000000	269000000	7410000	902000000	677000	13700000	244000	1030000	508000	57300	3130000	455000000	551000000	11600000	47700000	6950000	1550000	118000000	667000	1590000	20500000	1590000	6590000	1540000	55900000	2070000	38100000
Contr-36-KB-1	Control	3320000	1010000	2630000	163000	71000000	66800000	2960000	16100000	463000	19900000	897000	108000	4940000	232000000	404000	379000000	1880000	20600000	68100000	343000	304000000	91800000	101000000	5610000	597000000	670000	7920000	62800	620000	287000	34800	5350000	492000000	556000000	10100000	22900000	3570000	2140000	140000000	535000	420000	27100000	1250000	4220000	1190000	80400000	2860000	15600000
Contr-37-KB-1	Control	2800000	1420000	4580000	71900	91900000	91500000	4200000	8870000	719000	18400000	835000	66200	2990000	283000000	540000	300000000	1260000	16600000	75900000	337000	342000000	178000000	198000000	17200000	551000000	912000	10300000	68600	571000	542000	12200	4300000	523000000	595000000	9910000	29700000	4600000	1810000	99600000	633000	897000	29900000	1760000	5730000	1370000	88400000	2970000	19400000
Contr-38-KB-1	Control	2490000	548000	2490000	194000	94500000	96100000	4120000	5420000	748000	16000000	930000	129000	11200000	362000000	315000	349000000	2350000	18400000	52700000	389000	288000000	107000000	124000000	4410000	518000000	865000	9500000	78700	586000	425000	55200	5000000	467000000	527000000	9750000	18900000	5270000	1480000	149000000	1130000	621000	38000000	1490000	5210000	1310000	109000000	3730000	17500000
Contr-39-KB-1	Control	1770000	864000	2620000	158000	74800000	75400000	4150000	6010000	354000	18600000	701000	100000	3310000	212000000	187000	256000000	1240000	13600000	72500000	283000	289000000	103000000	114000000	4800000	366000000	639000	7240000	50000	639000	486000	45400	4120000	439000000	485000000	8570000	18200000	4320000	1080000	103000000	477000	861000	26700000	1160000	3750000	1240000	63700000	2650000	17000000
Contr-4-KB-1	Control	434000	1560000	650000	75700	16600000	14400000	1560000	1300000	399000	3090000	1160000	43400	3240000	55400000	73300	37000000	282000	1920000	7070000	163000	49100000	30600000	32600000	319000	75400000	318000	1870000	549000	165000	175000	16100	873000	66100000	71300000	1960000	3890000	10100000	116000	44600000	150000	151000	5220000	1180000	1520000	354000	8230000	392000	2720000
Contr-40-KB-2	Control	2460000	1000000	3500000	194000	94000000	87500000	3550000	6900000	539000	25300000	626000	158000	5970000	365000000	334000	352000000	1460000	19300000	65800000	470000	302000000	88200000	96600000	6120000	576000000	827000	9730000	46600	736000	389000	57500	4790000	478000000	586000000	9650000	31000000	5000000	1490000	108000000	621000	978000	39200000	1380000	4910000	1260000	74400000	2680000	23700000
Contr-5-KB-1	Control	505000	2360000	639000	50000	18300000	17000000	1180000	727000	456000	2900000	1290000		2150000	83800000	62400	71300000	390000	3940000	8830000	164000	53600000	11900000	14200000	1110000	116000000	263000	1520000	460000	139000	123000	31800	2670000	94700000	101000000	3670000	3000000	8260000	151000	45700000	269000	145000	7400000	1100000	1370000	392000	12400000	566000	3080000
Contr-6-KB-1	Control	483000	1470000	635000	50800	17600000	16500000	1740000	4400000	345000	4900000	839000	40900	2020000	79800000	48600	68300000	533000	3750000	10500000	281000	67600000	16400000	19000000	595000	113000000	404000	2230000	359000	188000	233000	26100	1410000	99700000	107000000	2520000	3530000	12900000	247000	52900000	162000	142000	7640000	1520000	1670000	622000	8370000	450000	2590000
Contr-7-KB-1	Control	760000	1080000	755000	29900	20300000	21600000	1540000	2230000	260000	3850000	1160000		3090000	91400000	43700	81900000	540000	4250000	9290000	238000	51100000	7180000	8670000	1350000	106000000	344000	1950000	384000	142000	130000	27400	1500000	84800000	86000000	2970000	3730000	10000000	129000	48900000	119000	198000	10800000	1050000	668000	506000	10200000	511000	3070000
Contr-8-KB-1	Control	388000	1860000	787000	47400	16400000	16300000	1610000	1880000	350000	5190000	1070000	43100	3660000	76300000	37900	49900000	460000	2760000	10700000	181000	60800000	14000000	18500000	1200000	68400000	423000	1410000	242000	146000	158000	23400	1300000	89300000	102000000	2870000	3770000	10700000	137000	42700000	122000	101000	6710000	915000	672000	295000	10600000	497000	2220000
Contr-9-KB-1	Control	781000	567000	693000	19600	21600000	20900000	1400000	2080000	433000	4060000	1140000	66400	2460000	120000000	52300	109000000	669000	5740000	12000000	394000	80100000	27500000	31300000	1300000	156000000	428000	2300000	227000	168000	197000	26600	2450000	109000000	121000000	2640000	5130000	16700000	229000	72100000	309000	301000	12900000	1630000	2570000	592000	9750000	611000	3700000
Sc-F10R KB-1	Sc	183000	1200000	757000	86600	21100000	19700000	1910000	726000	243000	4050000	1000000	57900	2610000	58400000	27800	43300000	515000	2550000	7000000	99100	66600000	25900000	30400000	551000	67200000	353000	1250000	328000	126000	149000	38000	703000	96300000	102000000	2380000	2590000	12300000	215000	41000000	115000	134000	4310000	595000	1950000	531000	9050000	501000	2660000
Sc-F11R KB-1	Sc	351000	732000	434000	438000	13200000	14300000	2200000	889000	316000	1750000	745000	77600	5430000	43400000	50400	55200000	498000	2880000	5750000	276000	51700000	21400000	27900000	911000	72700000	224000	1130000	49900	149000	151000	14500	1790000	63800000	72500000	1870000	1890000	10300000	175000	52600000	257000	96400	11400000	1670000	1060000	762000	5810000	319000	2160000
Sc-F12X KB-1	Sc	530000	880000	486000	85400	19700000	21100000	2250000	1590000	354000	2500000	728000		4900000	64900000	73500	58500000	665000	3170000	9600000	324000	68800000	18500000	23800000	536000	99300000	451000	1680000	74500	174000	236000	10800	1160000	84300000	83800000	2630000	4540000	7900000	271000	55900000	256000	118000	12900000	822000	2470000	690000	11100000	572000	2350000
Sc-F13R KB-1	Sc	491000	1680000	731000	156000	26900000	27900000	2530000	674000	382000	4170000	784000		6410000	154000000	96200	51200000	585000	2900000	9320000	280000	104000000	10400000	12200000	2150000	95400000	437000	3740000	47500	214000	211000		1700000	128000000	150000000	5260000	4330000	5220000	487000	61000000	239000	101000	13700000	1750000	2430000	637000	12500000	599000	2770000
Sc-F14K KB-1	Sc	477000	1100000	458000	59500	20100000	18900000	2530000	433000	331000	4120000	700000	42000	3870000	97800000	140000	67100000	796000	3620000	6730000	132000	103000000	20800000	25200000	1720000	102000000	337000	3840000	11200	164000	366000	17800	1190000	106000000	127000000	2450000	2910000	4850000	802000	32600000	208000	96400	4670000	1160000	2140000	897000	15800000	757000	3190000
Sc-F15R KB-1	Sc	1180000	379000	1580000	194000	42100000	39200000	3400000	2570000	603000	9910000	1240000	60100	3410000	308000000	255000	137000000	1480000	6680000	32200000	385000	215000000	130000000	145000000	2360000	202000000	393000	8790000	67300	496000	916000	44800	1860000	254000000	283000000	2980000	12600000	3230000	1570000	75300000	384000	397000	14300000	805000	2460000	1770000	37500000	1460000	9720000
Sc-F16K KB-1	Sc	1480000	200000	3140000	113000	34500000	35400000	3470000	4170000	361000	15700000	875000	54200	2320000	218000000	189000	200000000	1460000	11000000	66800000	325000	318000000	118000000	131000000	2950000	258000000	475000	9140000	70900	434000	410000	45700	2300000	474000000	535000000	8820000	13800000	2560000	1440000	66500000	479000	465000	15600000	1510000	3490000	2270000	51300000	2000000	11900000
Sc-F17R KB-1	Sc	1320000	731000	2310000	62700	72400000	72600000	3680000	2830000	572000	9940000	1010000	65300	4670000	171000000	244000	207000000	1750000	11800000	29400000	385000	272000000	47800000	50600000	3740000	316000000	585000	10500000	115000	683000	619000	68300	2470000	446000000	488000000	8110000	14700000	3790000	1500000	101000000	620000	360000	19000000	1910000	3060000	2660000	51000000	1790000	15000000
Sc-F18R KB-1	Sc	2010000		5690000	27800	104000000	103000000	4050000	2830000	689000	25100000	1020000		4770000	588000000	556000	247000000	1090000	14000000	46900000	540000	362000000	97700000	116000000	4510000	508000000	615000	13700000	101000	677000	487000	61900	3510000	607000000	750000000	14000000	25600000	5400000	3080000	117000000	817000	716000	38400000	2790000	6000000	1290000	44200000	1630000	15100000
Sc-M19R KB-1	Sc	386000	939000	515000	34300	8040000	7300000	1260000	1240000	325000	2780000	845000	44900	1690000	39500000	36900	41100000	294000	2140000	5380000	141000	44500000	6800000	7080000	420000	77700000	270000	2020000	176000	91000	78700	16100	1080000	62100000	62100000	1460000	3130000	8140000	70000	29600000	143000	76100	5890000	1100000	1750000	337000	10800000	556000	1850000
Sc-F1K KB-1	Sc	509000	959000	321000	108000	14400000	12500000	1490000	1320000	446000	1670000	1060000		2660000	49300000	42600	40700000	252000	2150000	4910000	124000	36500000	32600000	34900000	716000	77200000	318000	1400000	161000	112000	285000	17700	823000	47900000	47400000	1300000	2340000	9140000	90300	34100000	145000	98400	4510000	1630000	1170000	238000	9570000	487000	1860000
Sc-M20R KB-1	Sc	574000	745000	601000	90900	18300000	19500000	1500000	1250000	307000	5300000	926000		4130000	190000000	66600	50600000	526000	2660000	10300000	205000	75900000	6760000	8360000	1080000	94100000	354000	3110000	433000	163000	264000	10400	1790000	98400000	109000000	2830000	4340000	9940000	70200	28800000	162000	133000	7560000	1250000	2760000	488000	15700000	723000	2220000
Sc-M21K KB-1	Sc	433000	1500000	767000	88800	14000000	14800000	2690000	904000	358000	4130000	987000		5670000	62000000	109000	57400000	627000	2720000	10100000	362000	81600000	13800000	17000000	1220000	96700000	635000	2110000	38600	135000	192000	19900	2340000	104000000	117000000	3160000	5370000	8270000	249000	64100000	164000	100000	14600000	1060000	1880000	709000	15700000	735000	2770000
Sc-M22K KB-1	Sc	836000	2120000	563000	57900	15900000	18600000	2510000	2000000	350000	4410000	408000		7600000	60000000	240000	60200000	654000	3190000	10200000	346000	95800000	13300000	16500000	1100000	104000000	519000	2650000	24300	171000	363000	13800	2220000	121000000	146000000	4370000	5040000	6640000	284000	47200000	312000	87500	16100000	1620000	2630000	950000	15500000	840000	3670000
Sc-M23T KB-1	Sc	1280000	2200000	1150000	57200	36300000	36100000	3980000	3020000	621000	10200000	621000	25300	8150000	186000000	315000	131000000	1090000	6820000	28800000	456000	274000000	24700000	30100000	2760000	217000000	667000	9040000	33900	473000	671000	36800	3780000	306000000	335000000	8220000	12200000	9220000	346000	67600000	450000	252000	17600000	2040000	5360000	1280000	36200000	1480000	9120000
Sc-M24A KB-1	Sc	2260000	359000	2230000	110000	51100000	53400000	3490000	13200000	788000	22400000	1160000	72100	2590000	187000000	202000	271000000	1860000	15600000	66600000	315000	232000000	101000000	114000000	3670000	393000000	578000	9000000	97500	477000	954000	72500	3070000	318000000	350000000	4630000	22900000	2890000	2140000	87800000	443000	487000	16900000	1650000	4430000	2200000	58400000	2020000	12100000
Sc-M25K KB-1	Sc	2600000	614000	3150000	340000	107000000	109000000	3110000	7030000	462000	19200000	879000	49600	17200000	348000000	268000	435000000	2130000	26300000	54400000	319000	303000000	47800000	53600000	6500000	766000000	871000	13700000	198000	711000	716000	87100	5540000	547000000	549000000	12300000	23200000	5080000	1120000	158000000	652000	619000	17000000	2790000	3070000	1860000	88700000	3180000	23300000
Sc-M26B KB-1	Sc	1490000	629000	2680000	169000	81400000	73400000	4050000	5490000	477000	24200000	940000	159000	5540000	286000000	541000	225000000	1560000	12900000	58300000	341000	357000000	21300000	26300000	5480000	356000000	661000	16000000	73400	392000	715000	57600	6710000	554000000	623000000	11300000	20600000	3530000	1470000	122000000	821000	350000	27200000	1760000	4540000	1370000	67300000	2440000	10900000
Sc-M27R KB-1	Sc	359000	1150000	759000	60800	14400000	13600000	1640000	855000	372000	3060000	1170000	36400	1990000	64500000	55500	66100000	453000	3440000	7570000	234000	51200000	21400000	22200000	908000	129000000	312000	2380000	436000	172000	162000	15500	1290000	80700000	82000000	2600000	4720000	9230000	128000	50100000	169000	109000	8800000	1080000	2560000	360000	13600000	602000	3320000
Sc-M28K KB-1	Sc	355000	733000	646000	24600	24000000	24100000	2070000	1760000	312000	4820000	1090000	42100	5110000	93000000	33500	63700000	627000	3270000	9300000	326000	81900000	9280000	11600000	876000	92400000	389000	3670000	269000	182000	216000	12300	1750000	109000000	117000000	2840000	4700000	14500000	232000	52100000	226000	136000	11400000	1200000	1770000	666000	10600000	378000	3520000
Sc-M29K KB-1	Sc	406000	2040000	651000	53600	23500000	25100000	2430000	1920000	389000	4530000	877000	46200	6120000	57600000	150000	73600000	722000	3880000	12000000	285000	92700000	12300000	15700000	822000	110000000	698000	1810000	21000	158000	299000	5080	2050000	107000000	135000000	3900000	5420000	6290000	409000	68800000	197000	104000	14000000	1620000	2020000	638000	13300000	598000	2950000
Sc-F2K KB-1	Sc	507000	823000	559000	89300	13100000	12200000	1580000	780000	322000	3330000	974000	42400	3100000	79400000	52000	46100000	254000	2550000	5580000	214000	47700000	30000000	34600000	1100000	93100000	276000	1770000	350000	138000	261000	45800	1150000	65600000	63000000	1540000	2910000	11100000	162000	38600000	204000	145000	6110000	1360000	1120000	342000	6990000	416000	2690000
Sc-M30K KB-1	Sc	491000	512000	868000	34100	23800000	22500000	2470000	722000	594000	5310000	800000	33900	7260000	141000000	97600	62600000	782000	3090000	13000000	253000	125000000	12000000	15400000	1680000	117000000	653000	5210000	41200	294000	197000	7820	2450000	139000000	157000000	2980000	6350000	7180000	246000	53800000	211000	152000	12200000	1330000	2960000	1490000	33000000	1390000	4830000
Sc-M31R KB-1	Sc	797000	132000	893000	96100	29100000	27600000	3490000	1290000	610000	7560000	1100000	39700	5810000	170000000	245000	160000000	1630000	7650000	20800000	410000	206000000	31000000	34700000	2190000	218000000	496000	7670000	54300	460000	927000	28900	1240000	241000000	263000000	2950000	9490000	3350000	849000	55600000	326000	222000	17500000	870000	1180000	1890000	27200000	1060000	8790000
Sc-M32K KB-1	Sc	345000	910000	737000	56000	17000000	15100000	1600000	524000	459000	6310000	833000	34100	4680000	69200000	85200	41300000	457000	2040000	7900000	198000	80300000	5220000	6320000	752000	71700000	437000	2150000	423000	162000	163000	13700	2090000	112000000	128000000	2900000	3470000	12000000	167000	42000000	258000	122000	6010000	876000	3660000	669000	18900000	754000	2720000
Sc-M33K KB-1	Sc	326000	1020000	948000	65800	17400000	17700000	2270000	468000	437000	5050000	766000	29600	5360000	66600000	116000	44500000	492000	2590000	8140000	263000	90700000	5770000	7030000	731000	73200000	501000	1980000	44200	158000	159000		2650000	126000000	119000000	4360000	3770000	8310000	164000	54600000	203000	106000	9830000	991000	3550000	716000	20000000	929000	2750000
Sc-M34K KB-1	Sc	331000	1900000	825000	31700	25800000	27200000	2420000	1240000	302000	4450000	715000	23700	6700000	102000000	195000	65200000	564000	3670000	13900000	343000	91400000	11700000	15400000	1550000	116000000	399000	3020000	42400	164000	331000	17300	2460000	120000000	141000000	4700000	5070000	6320000	235000	66300000	224000	91100	17700000	1030000	3110000	862000	13200000	581000	3120000
Sc-M35R KB-1	Sc	504000	681000	514000	54100	22400000	21900000	2430000	869000	332000	3360000	690000	69900	6260000	138000000	101000	72500000	710000	3910000	11100000	209000	91600000	10100000	12900000	749000	99600000	377000	4100000	15300	217000	574000	52800	1460000	107000000	130000000	2590000	5040000	5710000	376000	47500000	234000	109000	10500000	1250000	2230000	836000	20400000	850000	4430000
Sc-M36R KB-1	Sc	760000	334000	1360000	321000	41900000	40100000	2350000	2670000	307000	11600000	233000	76600	8550000	98400000		148000000	791000	8000000	30600000	123000	256000000	25600000	30400000	2420000	216000000	426000	7270000	61300	353000	367000	32700	1460000	333000000	343000000	4480000	10800000	2180000	934000	34300000	372000	247000	7590000	918000	2310000	1610000	51800000	1920000	8780000
Sc-M37R KB-1	Sc	1820000	537000	2640000	109000	67300000	69600000	4320000	11500000	587000	22900000	553000	70400	4850000	147000000		265000000	1230000	14300000	67500000	215000	294000000	117000000	122000000	1870000	470000000	559000	8730000	166000	512000	551000	58200	4670000	441000000	490000000	8870000	22600000	3260000	2090000	117000000	663000	612000	9930000	1430000	5190000	2720000	50000000	1790000	15800000
Sc-M38U KB-1	Sc	1090000	1050000	3050000	335000	122000000	117000000	4260000	5050000	458000	20000000	700000	137000	12600000	310000000	346000	243000000	1110000	14400000	61500000	422000	349000000	18900000	21800000	4900000	454000000	677000	14700000	113000	566000	711000	48700	7230000	542000000	660000000	11800000	26900000	3880000	979000	104000000	671000	579000	35100000	1580000	4750000	1340000	57300000	2500000	17200000
Sc-M39U KB-1	Sc	1820000	487000	2050000	57400	41000000	35800000	3880000	3880000	394000	14900000	404000	167000	3630000	100000000	118000	202000000	386000	10000000	35700000	333000	230000000	29400000	34900000	3870000	376000000	344000	7040000	55700	368000	370000	29000	4470000	347000000	400000000	6380000	14900000	2980000	949000	89000000	723000	457000	29900000	1810000	3160000	1480000	40200000	1500000	12100000
Sc-F3K KB-1	Sc	437000	1170000	750000	30800	15700000	15000000	2050000	2040000	342000	5200000	1100000	56400	3250000	73900000	39700	74200000	505000	4100000	17000000	230000	89600000	15800000	18800000	1750000	97100000	412000	2000000	167000	134000	1260000	51300	1130000	118000000	133000000	2770000	3760000	12500000	84800	22800000	229000	160000	8530000	1200000	1070000	505000	9160000	466000	2130000
Sc-M40R KB-1	Sc	738000	937000	3410000	127000	70100000	72000000	4220000	2660000	404000	22100000	546000	196000	5310000	163000000	322000	267000000	1000000	13100000	48800000	369000	325000000	22600000	23000000	4200000	396000000	581000	11100000	45900	617000	300000	76700	5590000	525000000	614000000	11700000	17800000	4820000	1410000	108000000	634000	449000	29100000	1330000	4250000	1720000	67100000	2370000	12800000
Sc-M41K KB-1	Sc	1610000	1280000	3270000	168000	73800000	72400000	4020000	3390000	576000	24300000	524000	136000	3670000	264000000	382000	178000000	793000	9440000	55500000	343000	324000000	56800000	65200000	4600000	371000000	673000	10100000	41500	592000	424000	45900	5470000	502000000	609000000	11300000	18700000	2950000	1690000	120000000	708000	606000	28800000	1000000	5750000	1120000	82700000	3110000	16200000
Sc-F4R KB-1	Sc	337000	1030000	955000	137000	15800000	17100000	2440000	447000	281000	4990000	934000	54200	4480000	91200000	39600	40700000	358000	1960000	6210000	251000	81900000	24000000	31000000	2070000	69000000	406000	4860000	51400	200000	765000	22800	1520000	100000000	118000000	3740000	3260000	8100000	290000	35100000	214000	99700	9520000	1610000	1630000	635000	10800000	468000	2190000
Sc-F5K KB-1	Sc	550000	1490000	754000	202000	21800000	24500000	2350000	887000	376000	4100000	836000	45800	4970000	126000000	121000	70100000	593000	3800000	10100000	295000	85800000	21600000	25000000	1990000	124000000	594000	3260000	39000	154000	679000	7720	2100000	108000000	120000000	3050000	5610000	6300000	458000	71500000	190000	126000	14400000	1450000	2050000	796000	11200000	565000	3950000
Sc-F6K KB-1	Sc	801000	812000	697000	102000	24400000	26800000	2560000	1370000	266000	3980000	748000		5870000	153000000	124000	70100000	725000	3860000	17500000	179000	108000000	16900000	20900000	1660000	96900000	823000	3710000	21600	158000	372000		1790000	140000000	151000000	3960000	4450000	5680000	970000	62000000	263000	122000	9130000	1870000	2470000	903000	29200000	1240000	3540000
Sc-F7K KB-1	Sc	827000	179000	998000	425000	26100000	25000000	2460000	1480000	545000	10700000	1010000	140000	11600000	266000000	341000	75100000	823000	4010000	17500000	282000	205000000	45000000	52200000	2310000	153000000	520000	6170000	65800	435000	1080000	29100	1740000	238000000	248000000	2160000	6950000	5680000	1560000	51800000	436000	199000	9950000	1710000	2520000	1830000	31700000	1280000	6170000
Sc-F8K KB-1	Sc	1590000	229000	1520000	247000	41700000	39700000	3270000	2360000	259000	9650000	974000	38000	4150000	296000000	227000	145000000	1200000	7420000	29800000	350000	209000000	40500000	46100000	5930000	211000000	539000	9370000	64900	538000	5170000	56400	1220000	251000000	269000000	3010000	8930000	2530000	857000	27600000	316000	205000	14300000	1330000	2640000	2000000	40900000	1290000	9910000
Sc-F9R KB-1	Sc	369000	1080000	439000	33900	16300000	15200000	1440000	777000	270000	1630000	1090000		1510000	74100000	66300	57000000	327000	3120000	5440000	133000	41000000	17400000	20000000	505000	88200000	308000	1590000	457000	93900	87600		916000	60600000	58100000	1620000	2850000	9080000	61100	36200000	131000	95500	5690000	928000	1190000	339000	8040000	478000	2070000
[truncated: 164 more columns]

## Sheet: Master_Data_Pareto
Sample	Group	Symptoms	Response	Smoking	Cpz	PANSS	Onset	Duration	Hospitalization rate	BPRS	NegHighPosLow	MoCA	MADRS	Therapy	Clozapine	AP	Urea	Methylguanidine	Trimethylamine-N-oxide	Sarcosine	Alanine	beta-Alanine	Dimethylglycine	3-Aminoisobutyric acid	L-Serine	Hypotaurine	Histamine	Creatinine	L-Proline	Betaine	Guanidinoacetic acid	Indole	L-Valine	Threonine	Purine	Pipecolic acid	N-acetyl-L-alanine	Creatine	Hydroxyproline	L-leucine + L-Isoleucine	Ornithine	Methylcysteine	Homocysteine	Adenine	1-Methylnicotinamide	O-Phosphoethanolamine	Acetylcholine	L-Glutamine	L-Lysine
Contr-1-KB-1	Control	nan	nan	nan	nan	nan	nan	Нет значимых метаболитов	Нет значимых метаболитов	nan	Нет значимых метаболитов	nan	Нет значимых метаболитов	nan	nan	nan	-747.703	229.383	599.687	-5168.79	-5360.93	-1173.52	-1117	-492.434	-2160.85	452.594		-1367.17	-10163	-404.271	-9155.97	-900.694	-2077.22	-3658.95	-586.852	-11510.3	-3372.53	-3539.63	-1258.21	-10766.5	-542.05	-2167.25	164.669	-541.448	-453.349		-1110.04	-12650.2	-13722.6
Contr-10-KB-1	Control	nan	nan	nan	nan	nan	nan	nan	nan	nan	nan	nan	nan	nan	nan	nan	-605.391	126.145	-220.66	-3782.61	-3959.02	-830.245	-1088.08	-228.612	-2368.22	715.894	-94.287	-485.238	-9553.3	-340.837	-4287.84	-460.712	-1017.98	-3678.89	12.3136	-9906.74	-4112.37	-4464.42	-1255.65	-5978.24	-456.358	-1844.02	213.95	-316.136	-399.87		-798.898	-11011.7	-11680.1
Contr-11-KB-1	Control	nan	nan	nan	nan	nan	nan	nan	nan	nan	nan	nan	nan	nan	nan	nan	-602.999	797.195	-179.853	-2008.29	-2192.54	-422.605	-683.241	235.16	-2109.01	-332.917	-61.6296	574.308	-6717.88	-298.37	-4990.25	-506.891	-1223.95	-2271.5	346.731	-7164.84	-798.52	-706.527	-839.388	-7574.33	476.459	-1465.24	-87.2069	-146.524	-245.029		-333.018	-8639.8	-8372.96
Contr-12-KB-1	Control	nan	nan	nan	nan	nan	nan	nan	nan	nan	nan	nan	nan	nan	nan	nan	-563.534	1571.48	-148.615	-843.895	-68.9981	-68.6021	-989.761	-53.6559	-1942.37	81.7801	-147.355	1088.77	-824.473	-311.906	-5614.62	-104.108	-1102.05	-2650.26	424.762	-3452.88	-2802.24	-2717.59	-244.725	-6206.25	-475.945	-793.538	14.0911	-217.719	-66.7655	-166.47	-1412.03	-5987	-6192.41
Contr-13-KB-1	Control	nan	nan	nan	nan	nan	nan	nan	nan	nan	nan	nan	nan	nan	nan	nan	-433.181	1081.1	-136.514	-733	-162.96	-186.603	855.144	43.5418	-542.647	-212.238	-48.8728	1015.28	-3050.23	-103.288	385.172	356.398	-110.065	-1075.42	1051.8	-3551.87	141.688	688.005	-1161.02	-1950.02	860.848	-551.118	-73.518	-22.9795	-130.524		-823.856	-4582.58	-4956.76
Contr-14-KB-1	Control	nan	nan	nan	nan	nan	nan	nan	nan	nan	nan	nan	nan	nan	nan	nan	28.4358	835.909	-234.168	-1694.09	-1027.41	70.8536	-162.735	-225.835	-1131.42	-80.5882		-497.487	-243.841	0.224584	-785.52	125.503	-236.164	-2131.96	1361.13	-5630.57	804.457	1642.16	-596.408	178.094	187.555	171.09	-174.816	142.445	-388.16	-155.744	-166.632	-7157.35	-8372.96
Contr-15-KB-1	Control	nan	nan	nan	nan	nan	nan	nan	nan	nan	nan	nan	nan	nan	nan	nan	-51.6894	-230.028	-157.34	-3911.98	-3677.13	-165.148	-822.043	93.5292	-1842.39	-238.568	61.3461	-681.223	-7743.67	-119.213	-4580.51	74.1934	-938.119	-3188.49	622.626	-7669.67	-1646.25	-1176.26	-749.869	-5370.21	-187.041	-1556.15	-242.987	-198.874	-388.16	-163.073	-466.127	-9661.91	-9753.97
Contr-16-KB-1	Control	nan	nan	nan	nan	nan	nan	nan	nan	nan	nan	nan	nan	nan	nan	nan	-55.2771	1365.01	-53.2132	-1860.43	-1459.63	-14.9653	-399.854	-145.299	-87.1801	68.6151	-101.431	-25.897	433.562	300.146	-2639.11	125.503	-635.48	1077.53	176.736	-2463.03	-1723.31	-1528.57	273.207	-4838.18	532.771	-1041.01	-276.662	-291.009	-349.124	-171.134	-507.723	-3568.27	-3939.17
Contr-17-KB-1	Control	nan	nan	nan	nan	nan	nan	nan	nan	nan	nan	nan	nan	nan	nan	nan	-451.12	835.909	-57.4345	-2876.97	-2587.18	-208.058	-856.743	-220.281	-2097.9	-183.714		451.817	-8043.66	-76.7464	-5429.26	-269.583	-1400.48	-3511.44	-15.5546	-8144.8	-413.189	-295.507	-1010.11	-7270.31	87.173	-1788.47	-298.29	-381.05	-238.523	-176.731	66.3078	-10044.2	-9826.66
Contr-18-KB-1	Control	nan	nan	nan	nan	nan	nan	nan	nan	nan	nan	nan	nan	nan	nan	nan	-70.8238	1158.53	-107.246	-936.307	-444.845	-218.785	-214.786	-103.643	-2109.01	42.2851	65.9385	1235.76	-5759.84	-63.4755	-1273.31	-102.826	-173.115	-3009.08	249.193	-6947.07	-336.123	-236.79	-187.177	-3394.1	8.82611	-1495.54	-230.393	-259.599	-95.3917	-137.755	-782.26	-8483.75	-8881.75
Contr-19-KB-1	Control	nan	nan	nan	nan	nan	nan	nan	nan	nan	nan	nan	nan	nan	nan	nan	-244.229	1790.87	-263.717	-3302.06	-2681.14	-250.967	-498.172	-84.2037	-1727.6	-374.607	-175.931	-889.458	-9146.86	-116.559	-6834.09	-397.857	-1497.16	-3188.49	-199.484	-5333.61	-4405.22	-4758.01	-1088.12	-8942.4	417.699	-1682.41	-286.792	-431.305	-353.027	-161.34	-807.218	-8093.63	-8227.59
Contr-2-KB-1	Control	nan	nan	nan	nan	nan	nan	nan	nan	nan	nan	nan	nan	nan	nan	nan	-760.858	48.7157	-148.615	-4854.59	-4898.64	-1312.98	-1140.13	-250.828	-2397.84	1110.84	-153.989	-1520.29	-11140.4	-329.424	-8102.34	-995.617	-1913.29	-4276.93	-533.902	-11549.9	-2617.28	-3202.01	-1168.05	-10622.1	-671.812	-1657.16	504.155	-543.124	-384.256	-87.7865	-1308.87	-12626.8	-13359.1
Contr-20-KB-1	Control	nan	nan	nan	nan	nan	nan	nan	nan	nan	nan	nan	nan	nan	nan	nan	-622.133	448.765	-77.4155	-2230.08	-1609.97	17.2168	-845.176	-311.924	-2049.76	-117.889		1009.15	-4405.03	-301.024	-5497.55	-436.34	-1223.95	-3228.36	-54.57	-7996.32	-4883.03	-5154.35	-1008.2	-6130.25	415.25	-1525.85	-280.221	-207.25	-390.762	-125.096	-416.211	-9708.72	-10117.4
Contr-21-KB-1	Control	nan	nan	nan	nan	nan	nan	nan	nan	nan	nan	nan	nan	nan	nan	nan	-396.108	-41.618	-248.802	-2174.63	-1985.82	-519.151	-648.541	-98.0891	-1305.46	-262.704	-154.499	1768.59	3336.72	-251.656	-5351.22	87.0209	-1282.79	-1573.78	-12.7677	-3452.88	-5371.63	-5668.13	-417.369	-6358.26	-15.6573	-1101.61	-302.397	-242.847	-276.257		-258.144	-7469.45	-7064.63
Contr-22-KB-1	Control	nan	nan	nan	nan	nan	nan	nan	nan	nan	nan	nan	nan	nan	nan	nan	-133.011	190.669	-235.294	-2544.28	-2530.8	-637.152	-394.071	-175.847	-1523.94	-620.353		-123.89	-3243.77	-156.372	-5224.39	-152.853	-1047.41	-2929.34	-216.205	-3155.93	-3773.28	-3935.97	100.563	-6814.29	-463.703	-596.572	-307.599	-211.437	-147.439	-144.684	-565.958	-5987	-6337.78
Contr-23-KB-1	Control	nan	nan	nan	nan	nan	nan	nan	nan	nan	nan	nan	nan	nan	nan	nan	-536.029	-630.078	-84.1697	-3357.51	-3714.72	-186.603	-1018.68	-214.726	-1927.56	-58.6466	-147.355	421.195	-5082.44	-71.4381	-7858.45	-406.836	-1740.95	-2151.89	-363.906	-6293.77	-1399.64	-1880.87	-1161.66	-10690.5	-89.1075	-874.345	-307.599	-299.385	-267.149	-166.937	-699.067	-8249.68	-9027.12
Contr-24-KB-1	Control	nan	nan	nan	nan	nan	nan	nan	nan	nan	nan	nan	nan	nan	nan	nan	-14.6165	422.955	-149.741	-1620.16	-1252.92	-68.6021	-469.255	-125.86	-1168.45	-113.501	-126.944	2644.4	1498.05	-127.176	-2931.79	163.986	-639.684	-915.938	-124.24	209.581	-2848.48	-2996.5	254.024	-3242.09	378.525	-788.488	-325.668	-184.216	-148.741	-137.089	-407.892	-3412.23	-2848.89
Contr-25-KB-1	Control	nan	nan	nan	nan	nan	nan	nan	nan	nan	nan	nan	nan	nan	nan	nan	-54.0812	332.622	-197.864	-3412.96	-3470.42	113.763	-665.891	-353.58	-1568.37	-207.85	-39.6879	966.279	-6814.66	-153.717	-5273.17	-122.067	-1341.64	-2530.65	-129.814	-2562.01	-1029.72	-779.923	-1035.69	-8182.36	-138.074	-808.689	-331.965	-198.874	-238.523	-121.765	-682.428	-5752.93	-5756.3
Contr-26-KB-1	Control	nan	nan	nan	nan	nan	nan	nan	nan	nan	nan	nan	nan	nan	nan	nan	-62.4525	-1053.36	-155.932	-2119.18	-2286.5	607.222	-220.569	-275.822	-638.924	562.303	-32.544	-2736.01	4207.67	204.596	-1273.31	228.123	-273.994	-457.44	196.243	-285.347	3070.2	3139.45	55.8034	-1265.98	-282.526	610.476	-301.028	376.97	-170.861	-98.4465	-1229.01	-3412.23	-3939.17
Contr-27-KB-1	Control	nan	nan	nan	nan	nan	nan	nan	nan	nan	nan	nan	nan	nan	nan	nan	1834.24	-1036.58	112.826	4552.98	4253.25	853.951	739.476	1104.39	375.693	-10.3749	87.8803	2068.7	20658.9	427.546	10921.4	1767.42	2348.88	4685.71	839.998	13968.6	9420.46	10126.8	3617.39	9678.61	65.1379	2812.46	-97.3368	1072.17	85.4738	-22.4942	1131.18	12036.4	10016.4
Contr-28-KB-1	Control	nan	nan	nan	nan	nan	nan	nan	nan	nan	nan	nan	nan	nan	nan	nan	387.206	-1103.68	-199.553	-733	-557.6	821.769	-457.688	57.4272	112.781	162.964	-127.455	-1526.41	6046.33		7019.09	1818.73	1340.08	260.209	310.503	2981.18	3147.27	3565.15	-20.9273	4130.31	-321.7	2812.46	-161.949	760.168	-113.608	-9.16924	-565.958	176.853	203.877
Contr-29-KB-1	Control	nan	nan	nan	nan	nan	nan	nan	nan	nan	nan	nan	nan	nan	nan	nan	590.508	-926.888	-135.951	431.394	-275.714	735.95	1890.37	454.549	357.178	11.5668	-114.188	905.034	9433.35	-28.9713	11994.5	1113.22	2474.98	3270.35	274.274	9316.25	311.233	629.288	1782.24	12566.8	-76.8658	1191.27	-147.438	607.308	-354.329	160.724	299.248	7667.11	7108.95
Contr-3-KB-1	Control	nan	nan	nan	nan	nan	nan	nan	nan	nan	nan	nan	nan	nan	nan	nan	-728.568	1287.58	-172.255	-4411.01	-4673.13	-1205.7	-937.711	-356.357	-2097.9	408.711		-883.333	-10366.2	-314.56	-7653.58	-840.405	-1690.51	-3477.55	-433.577	-11193.6	-4220.26	-4713.97	-1098.99	-9398.43	-260.491	-2197.55	829.951	-391.52	-472.737	118.75	-998.561	-11854.4	-13075.7
Contr-30-KB-1	Control	nan	nan	nan	nan	nan	nan	nan	nan	nan	nan	nan	nan	nan	nan	nan	530.713	-1045.61	200.067	1651.24	1753.86	746.677	218.97	110.192	-331.577	149.799	-76.4275	813.166	8465.63	472.667	5165.5	1203.01	1083.68	-836.199	171.162	6544.66	1436.4	2214.65	586.524	3066.25	-113.591	1489.25	-24.2379	443.978	211.689	555.143	-8.56579	5482.45	5437.2
Contr-31-KB-1	Control	nan	nan	nan	nan	nan	nan	nan	nan	nan	nan	nan	nan	nan	nan	nan	674.221	-1017.22	2082.78	5384.69	4910.98	939.77	1595.42	-67.5413	2005	138.828	19.5037	-889.458	11949.4	661.113	8482.46	1151.7	1508.21	5702.38	48.5422	12780.7	6815.62	6838.63	855.082	5422.38	-559.189	2913.46	49.6824	724.571	399.061	46.7956	-116.717	14845.3	14595.5
Contr-32-KB-1	Control	nan	nan	nan	nan	nan	nan	nan	nan	nan	nan	nan	nan	nan	nan	nan	554.631	-653.306	-269.909	9081.18	9383.56	1197.23	1560.72	168.51	2227.18	386.769	-131.537	-1753.02	18336.4	934.493	20482	1664.8	4744.77	2094.2	547.382	12186.8	5675.04	6016.59	100.563	23587.4	185.107	2408.42	85.2736	1371.61	-390.762	74.778	-516.042	15313.4	15031.6
Contr-33-KB-1	Control	nan	nan	nan	nan	nan	nan	nan	nan	nan	nan	nan	nan	nan	nan	nan	255.657	-701.054	703.814	6752.39	6395.58	993.407	2457.15	529.53	7300.27	-258.316	6.74694	905.034	2949.63	491.246	8189.78	1113.22	1382.11	12280.8	-12.7677	14364.5	10191.1	11301.1	925.418	5574.39	275.695	2711.45	30.5179	188.512	-4.30839	26.1419	690.254	21087.1	20192.3
Contr-34-KB-1	Control	nan	nan	nan	nan	nan	nan	nan	nan	nan	nan	nan	nan	nan	nan	nan	745.975	-548.777	-181.542	8859.39	7992.93	-873.154	1606.99	-342.472	3782.44	430.653		1064.27	8368.86	860.176	10726.3	1023.43	2306.85	4406.63	199.03	10108.1	3702.15	3609.18	1014.94	7550.49	-67.0724	261.998	-37.9268	81.7194	-333.51	43.4644	-391.253	13831	16340
Contr-35-KB-1	Control	nan	nan	nan	nan	nan	nan	nan	nan	nan	nan	nan	nan	nan	nan	nan	1595.06	-382.305	231.024	17934.3	16637.4	639.404	4863.04	251.823	5745.02	-91.5591	181.77	1125.52	24336.2	111.7	37554.6	2254.86	7687.1	22945.9	31.8213	11691.9	31153.1	32292.5	3099.46	51936.9	429.94	4125.56	304.297	1440.71	116.702	170.718	673.616	18044.2	21791.3
Contr-36-KB-1	Control	nan	nan	nan	nan	nan	nan	nan	nan	nan	nan	nan	nan	nan	nan	nan	2779	-54.5228	121.269	5920.68	5324.41	296.128	7523.41	118.523	4041.64	29.1201	212.387	-191.26	6820.51	586.797	23408.8	1126.05	5543.4	8214.16	79.1971	14364.5	7540.04	7631.31	1948.49	28755.6	412.802	1206.42	-191.79	582.18	-170.861	20.8119	2520.5	20931.1	22154.8
Contr-37-KB-1	Control	nan	nan	nan	nan	nan	nan	nan	nan	nan	nan	nan	nan	nan	nan	nan	2157.14	474.575	-135.107	9783.52	9966.13	1626.32	3342.01	829.455	3486.2	-106.918	-0.907151	-1385.55	11755.9	947.764	15701.7	330.743	3862.08	9769.06	62.4763	18126	20826.3	21870.2	9359.4	25259.5	1005.3	2408.42	-175.911	479.575	160.943	-129.76	1646.97	23349.8	24989.5
Contr-38-KB-1	Control	nan	nan	nan	nan	nan	nan	nan	nan	nan	nan	nan	nan	nan	nan	nan	1786.41	-650.725	208.51	10264.1	10830.6	1540.5	1346.73	909.99	2597.48	101.528	319.544	3642.71	19400.9	350.575	20482	1728.94	4618.67	5144.21	207.391	12780.7	9882.86	11007.5	1181.19	22751.3	890.228	2004.39	-148.26	510.985	8.70352	156.727	2229.32	18980.5	20046.9
Contr-39-KB-1	Control	nan	nan	nan	nan	nan	nan	nan	nan	nan	nan	nan	nan	nan	nan	nan	925.36	-242.933	107.198	6623.02	6940.55	1572.68	1687.95	-184.179	3560.26	-400.937	171.565	-1189.56	4885.07	10.8413	11409.2	305.088	2601.08	9091.28	-88.0117	12879.7	9266.33	9539.62	1430.56	11198.7	336.904	862.997	-226.834	621.966	88.0761	91.4342	1497.23	16795.9	16994.1
Contr-4-KB-1	Control	nan	nan	nan	nan	nan	nan	nan	nan	nan	nan	nan	nan	nan	nan	nan	-672.361	655.242	-124.413	-4133.77	-4522.79	-1205.7	-1036.03	-59.21	-2183.07	606.186	-117.249	-1232.43	-10269.4	-290.938	-9955.94	-923.783	-2308.4	-3951.99	-422.429	-10866.9	-1892.86	-2409.32	-1434.69	-10888.1	-449.013	-1849.07	1139.32	-370.58	-316.594	-103.776	-1204.05	-12299.1	-13075.7
Contr-40-KB-2	Control	nan	nan	nan	nan	nan	nan	nan	nan	nan	nan	nan	nan	nan	nan	nan	1750.53	-67.4277	208.51	10171.6	9214.43	929.042	2202.68	329.581	6041.25	-565.499	467.523	439.568	19691.2	401.005	20774.7	587.292	4996.97	7755.66	433.123	14166.5	6985.17	6985.42	2274.6	27159.6	797.191	2120.55	-236.143	825.082	-38.1393	172.05	2054.62	19838.8	24335.3
Contr-5-KB-1	Control	nan	nan	nan	nan	nan	nan	nan	nan	nan	nan	nan	nan	nan	nan	nan	-587.452	1687.63	-196.739	-3819.57	-4034.19	-1613.34	-1367.42	99.0834	-2253.42	891.428		-1900.01	-7521.09	-319.869	-6609.71	-785.247	-1459.33	-3601.14	-419.643	-10421.5	-4775.14	-5110.31	-928.908	-7802.34	-583.672	-2025.84	895.658	-425.023	-384.256	0.824482	290.929	-10067.6	-10916.9
Contr-6-KB-1	Control	nan	nan	nan	nan	nan	nan	nan	nan	nan	nan	nan	nan	nan	nan	nan	-613.762	539.099	-194.487	-3948.95	-4128.15	-1012.61	756.826	-209.172	-1512.83	-98.1416	-130.006	-1979.63	-7908.18	-356.496	-6902.38	-601.814	-1539.19	-3268.23	-93.5854	-9035.67	-4081.54	-4405.71	-1258.21	-8030.35	-238.456	-1667.26	619.142	-322.418	-241.125	-37.1517	-757.302	-9677.51	-10480.8
Contr-7-KB-1	Control	nan	nan	nan	nan	nan	nan	nan	nan	nan	nan	nan	nan	nan	nan	nan	-282.498	35.8109	-253.305	-3449.92	-3169.74	-1227.16	-498.172	-445.224	-1901.64	606.186		-1324.3	-6785.62	-369.502	-5575.6	-592.835	-1329.03	-3509.44	-213.418	-10668.9	-5502.64	-5922.08	-775.446	-8562.38	-385.357	-1808.67	687.587	-418.741	-375.148	-28.4904	-682.428	-10840.1	-12007.2
Contr-8-KB-1	Control	nan	nan	nan	nan	nan	nan	nan	nan	nan	nan	nan	nan	nan	nan	nan	-727.372	1042.39	-204.056	-4170.74	-4165.73	-1152.07	-700.591	-195.287	-1405.44	408.711	-118.78	-975.201	-8246.88	-384.896	-8697.44	-695.454	-1955.32	-3228.36	-372.267	-9708.77	-4451.46	-4479.1	-871.359	-11420.1	-191.938	-2081.39	298.821	-410.365	-338.714	-55.1404	-848.814	-10489	-10844.2
Contr-9-KB-1	Control	nan	nan	nan	nan	nan	nan	nan	nan	nan	nan	nan	nan	nan	nan	nan	-257.384	-626.206	-282.291	-3209.65	-3301.29	-1377.34	-584.923	35.2106	-1823.88	562.303	0.113394	-1710.15	-4017.95	-346.676	-2931.79	-427.36	-702.733	-2969.21	221.325	-7798.35	-2370.67	-2600.15	-807.417	-4762.17	-179.696	-1631.91	257.754	-364.298	-287.968	-33.8204	107.904	-8951.89	-9463.23
Sc-F10R KB-1	Sc	Neg	Yes	No	Low	Low	Early	Long	Complicated	severe	nan	Impairment	Mild	Mono	No	Atypical	-972.532	190.669	-93.738	-3302.06	-3526.79	-830.245	-1368	-492.434	-1827.58	255.119	-43.2598	-1618.28	-9979.1	-411.703	-9341.33	-624.903	-2043.59	-3965.95	-600.507	-9134.66	-2617.28	-2732.27	-1286.34	-11511.3	-363.321	-2162.2	534.271	-452.245	-350.425	42.1319	-1345.48	-9942.79	-10844.2
Sc-F11R KB-1	Sc	Neg	Yes	No	Low	Low	Early	Short	Moderate	severe	PosLow	normal	Severe	Mono	No	Atypical	-771.621	-413.277	895.181	-4762.18	-4541.58	-519.151	-1273.73	-289.708	-2679.27	-304.393	57.2639	108.843	-11430.7	-351.719	-8180.39	-646.71	-1904.88	-4215.13	-107.519	-10609.5	-3310.88	-3099.25	-1056.15	-11093.3	-679.157	-2222.8	-227.108	-404.083	-347.823	-114.436	-441.169	-12478.6	-12988.5
Sc-F12X KB-1	Sc	Neg	No	No	High	Low	Early	Short	Moderate	severe	nan	Impairment	Severe	Mono	No	Typical	-557.555	-222.285	-97.1151	-3560.82	-3263.7	-465.514	-868.31	-184.179	-2401.54	-341.694		-215.758	-9350.08	-290.407	-7858.45	-432.491	-1782.99	-3447.65	26.2477	-8916.89	-3757.86	-3701.1	-1295.94	-9071.61	-123.384	-1945.03	-159.758	-351.734	-237.221	-139.088	-965.284	-10879.1	-12167.1
Sc-F13R KB-1	Sc	Neg	No	No	Low	High	Late	Short	Moderate	severe	NegHigh	Impairment	Severe	Mono	No	Atypical	-604.195	810.1	101.569	-2230.08	-1985.82	-165.148	-1398.07	-106.42	-1783.15	-218.821		709.048	-727.701	-230.158	-8570.62	-535.111	-1896.48	-3503.46	-96.3722	-5432.6	-5006.33	-5403.9	-263.908	-9368.02	-157.661	-904.647	-233.679	-267.975	-269.751		-516.042	-7469.45	-7355.37
Sc-F14K KB-1	Sc	Neg	Yes	No	Low	High	Late	Short	Complicated	severe	NegHigh	Impairment	Severe	Mono	No	Atypical	-620.937	61.6205	-170.004	-3486.89	-3677.13	-165.148	-1537.45	-248.051	-1801.66	-403.131	-124.393	-846.586	-6166.28	-113.905	-7019.45	-264.452	-1593.84	-4019.77	-508.821	-5531.58	-3403.36	-3495.59	-538.86	-8866.4	-402.495	-854.143	-333.06	-372.674	-68.0667	-92.4503	-940.326	-9185.96	-9027.12
Sc-F15R KB-1	Sc	Neg	No	No	Low	High	Late	Short	Moderate	severe	NegHigh	Impairment	Severe	Mono	No	Typical	219.78	-868.817	208.51	579.254	137.718	768.132	-301.537	507.314	342.366	781.719	-32.0338	-1128.31	14175.2	191.325	-200.174	612.947	-307.621	1057.6	196.243	5554.8	13427.9	14090.2	-129.629	-1265.98	-265.388	1645.81	-179.47	322.527	647.588	87.4367	-382.934	2361.51	2311.74
Sc-F16K KB-1	Sc	Neg	Yes	No	High	High	Late	Short	Complicated	Critical	NegHigh	Impairment	Severe	Poly	No	Typical	578.549	-1099.81	-19.4425	-825.413	-576.392	843.224	623.808	-164.739	2486.39	-19.1516	-62.1399	-1795.89	5465.7	16.1496	5945.96	587.292	1508.21	7955.01	29.0345	15750.3	11578.3	12035.1	247.63	2990.25	-64.6241	1822.57	-169.614	192.7	-10.8143	93.433	-16.8851	19526.7	20628.4
Sc-F17R KB-1	Sc	Pos	No	No	Low	nan	Late	Short	Complicated	severe	nan	normal	Mild	Mono	No	Atypical	387.206	-414.567	-160.998	6179.44	6414.37	1068.5	-151.168	421.224	353.475	277.061	-5.4996	-356.622	917.422	162.129	6628.86	959.288	1844.48	499.426	196.243	11197	758.217	232.948	752.774	7398.49	204.693	2509.43	-48.8779	714.101	261.134	244.005	124.543	17342	17212.2
Sc-F18R KB-1	Sc	Pos	Yes	No	Low	Low	Early	Short	Moderate	Critical	PosLow	normal	Mild	Mono	No	Typical	1212.38		-259.215	12019.9	12127.2	1465.41	-151.168	746.143	5967.19	299.003		-295.377	41271.3	990.231	10531.2	112.676	2769.21	3988	628.2	20105.7	8449.42	9833.2	1245.13	21991.3	278.143	4125.56	-87.2069	701.537	89.3773	201.365	989.749	29903.8	36255.7
Sc-F1K KB-1	Sc	Neg	Yes	Yes	High	High	Late	Long	Complicated	severe	NegHigh	Impairment	Mild	Mono	Yes	Typical	-582.669	-120.337	-33.5136	-4540.39	-4879.84	-1280.79	-1024.46	71.3126	-2708.89	386.769		-1587.66	-10859.7	-372.421	-9594.97	-962.266	-2211.73	-4382.58	-531.115	-12114.1	-1584.6	-2071.7	-1180.84	-10751.3	-449.013	-2086.44	77.0602	-481.561	-173.463	-93.1165	-1245.64	-13719.1	-14812.8
Sc-F2K KB-1	Sc	Neg	Yes	Yes	Low	High	Early	Long	Moderate	severe	NegHigh	Impairment	Mild	Mono	No	Atypical	-585.06	-295.843	-86.1396	-4780.66	-4936.22	-1184.25	-1336.77	-273.045	-2094.2	198.071	-122.352	-1318.18	-7946.89	-347.472	-9068.16	-959.7	-2043.59	-4249.02	-280.302	-11005.5	-1985.34	-2115.74	-935.302	-9542.83	-551.844	-1899.58	594.502	-427.117	-204.692	94.0992	-973.603	-12338.1	-13679
Sc-F3K KB-1	Sc	Neg	Yes	No	High	High	Early	Short	Complicated	Critical	NegHigh	normal	Severe	Poly	No	Typical	-668.773	151.954	-250.772	-4300.11	-4410.04	-680.062	-608.057	-217.503	-1401.74	474.536	-50.9139	-1226.31	-8479.13	-380.118	-6326.79	-637.731	-1392.08	-1972.48	-235.713	-6857.99	-4174.02	-4435.07	-519.677	-9238.82	-218.869	-1783.42	93.487	-435.493	1095.2	130.743	-990.242	-8249.68	-8591.01
Sc-F4R KB-1	Sc	Neg	Yes	No	High	High	Early	Long	Moderate	Critical	NegHigh	Impairment	Mild	Poly	Yes	Typical	-788.363	-28.7132	48.0989	-4281.63	-4015.4	-261.695	-1529.35	-386.905	-1479.5	110.304	-62.1399	-472.989	-6804.98	-380.384	-9594.97	-826.295	-2291.59	-4123.43	-177.19	-7620.18	-2910.13	-2644.19	-315.062	-11374.5	-233.559	-339.001	-223.001	-297.291	451.108	-59.1379	-665.79	-9654.1	-9681.29
Sc-F5K KB-1	Sc	Neg	Yes	No	High	High	Late	Long	Complicated	Critical	NegHigh	Impairment	Mild	Mono	No	Atypical	-533.637	564.908	231.024	-3172.68	-2624.76	-358.241	-1274.88	-123.083	-1809.07	-104.724	-105.003	-172.886	-3437.32	-164.334	-6726.78	-524.849	-1518.18	-3347.97	-54.57	-7234.13	-3280.05	-3524.95	-366.216	-7194.31	226.728	-1147.07	-256.95	-393.614	339.206	-159.608	-183.271	-9029.92	-9535.92
Sc-F6K KB-1	Sc	Pos	Yes	No	High	Low	Early	Long	Complicated	Critical	nan	normal	Severe	Mono	No	Typical	-233.466	-310.038	-50.399	-2692.14	-2192.54	-132.966	-995.545	-428.561	-1853.5	-297.811		378.323	-824.473	-156.372	-6726.78	-355.527	-1492.96	-1872.8	-377.84	-5036.65	-4004.47	-4126.8	-577.225	-9254.02	787.398	-919.798	-304.587	-385.238	-60.2596		-441.169	-6533.16	-7282.68
Sc-F7K KB-1	Sc	Neg	No	No	Low	High	Late	Long	Complicated	severe	NegHigh	Impairment	Severe	Poly	No	Typical	-202.373	-1126.91	858.596	-2377.94	-2530.8	-240.24	-931.927	346.243	634.901	277.061	375.674	3887.69	10110.8	419.584	-6238.99	-229.817	-1429.91	-1872.8	-90.7985	4564.94	326.647	467.816	-161.6	-4990.19	45.5512	322.603	-183.577	194.794	860.983	-17.1642	-482.765	1113.13	-232.233
Sc-F8K KB-1	Sc	Pos	Yes	No	High	High	Late	Long	Moderate	Critical	NegHigh	Impairment	Severe	Poly	Yes	Atypical	710.098	-1062.39	357.664	505.324	231.68	628.676	-422.988	-448.001	246.088	198.071	-144.804	-675.099	13013.9	117.008	580.287	253.778	3.42493	579.165	98.7048	4960.89	-366.949	-427.62	2153.11	-581.948	92.0697	1938.73	-186.041	410.474	6182.85	164.722	-915.368	2127.44	1294.15
Sc-F9R KB-1	Sc	Pos	Yes	No	High	Low	Early	Short	Complicated	severe	PosLow	Impairment	Severe	Mono	No	Typical	-750.094	35.8109	-242.048	-4189.22	-4372.45	-1334.43	-1338.5	-417.453	-2723.7	452.594		-2291.98	-8459.78	-309.517	-8004.79	-866.06	-1804	-4276.93	-506.034	-11668.7	-3927.41	-4258.91	-1315.76	-9915.25	-473.497	-1990.49	887.445	-519.462	-430.318		-1168.27	-12728.2	-14035.1
Sc-M19R KB-1	Sc	Pos	No	Yes	High	High	Early	Long	Complicated	severe	nan	Impairment	Severe	Poly	No	Typical	-729.764	-146.147	-240.922	-5715.87	-5857.05	-1527.52	-1070.73	-264.714	-2297.86	-84.9766	-109.595	-2181.74	-11808.1	-387.55	-9555.95	-908.39	-2215.93	-4288.89	-483.739	-11322.2	-5561.21	-6155.48	-1370.11	-10713.3	-566.534	-1773.32	118.127	-525.534	-441.899	-103.776	-1031.84	-12611.2	-13744.4
Sc-M20R KB-1	Sc	Pos	No	Yes	Low	High	Early	Long	Moderate	severe	nan	normal	Severe	Poly	Yes	Atypical	-504.935	-396.5	-81.6369	-3819.57	-3564.38	-1270.07	-1064.95	-314.701	-1364.71	92.751		-687.348	2756.09	-308.721	-8629.15	-610.793	-1997.36	-3308.1	-305.383	-8214.09	-5567.38	-5967.58	-948.09	-9466.83	-360.873	-1222.82	821.738	-374.768	-200.788	-141.753	-441.169	-9778.94	-10335.5
Sc-M21K KB-1	Sc	Pos	No	Yes	High	High	Early	Long	Moderate	severe	nan	Impairment	Severe	Mono	No	Typical	-673.557	577.813	-87.5467	-4614.32	-4447.62	6.48939	-1265.05	-173.07	-1797.96	226.595		255.832	-9630.72	-196.184	-7965.76	-481.236	-1972.14	-3347.97	132.147	-7649.87	-4482.28	-4699.29	-858.571	-9269.22	327.11	-1727.86	-258.045	-433.399	-294.474	-78.459	16.3921	-9342.01	-9753.97
Sc-M22K KB-1	Sc	Pos	Yes	Yes	Low	High	Late	Long	Complicated	severe	nan	Impairment	Mild	Mono	No	Atypical	-191.61	1377.91	-174.506	-4263.15	-3733.51	-186.603	-631.191	-195.287	-1694.27	-1043.83		1437.87	-9824.26	151.512	-7692.6	-446.602	-1774.58	-3328.04	87.5576	-6244.28	-4559.35	-4772.69	-935.302	-8714.39	43.1029	-1455.14	-297.195	-358.016	-71.9703	-119.1	-83.4394	-8015.61	-7646.11
Sc-M23T KB-1	Sc	Pos	Yes	Yes	High	High	Early	Long	Complicated	severe	nan	normal	Severe	Poly	No	Typical	339.37	1481.15	-176.476	-492.729	-444.845	1390.32	-41.2835	557.301	449.752	-576.47	-209.609	1774.72	2369	350.575	-785.52	112.676	-248.774	379.818	394.107	11394.9	-2802.24	-2776.31	126.14	-125.923	405.457	1772.07	-270.912	274.365	328.796	34.1369	1214.37	6418.73	6091.36
Sc-M24A KB-1	Sc	Pos	Yes	No	Low	High	Late	Short	Complicated	severe	nan	Impairment	Severe	Poly	Yes	Atypical	1511.35	-894.626	-27.8852	2242.67	2806.23	864.678	5846.22	1021.07	4967.39	606.186	29.1989	-1630.53	2465.77	50.6539	12872.6	1100.39	3441.74	7915.14	1.16633	7237.55	8958.06	9539.62	708.015	13250.8	187.555	1751.87	-96.7892	282.741	697.033	271.987	623.7	7355.01	7181.64
Sc-M25K KB-1	Sc	Pos	Yes	No	Low	High	Late	Short	Moderate	severe	nan	normal	Mild	Poly	Yes	Atypical	1917.96	-565.554	619.387	12574.4	13254.8	457.039	2277.86	115.746	3782.44	-10.3749	-85.6124	7317.43	18046.1	225.829	28872	1446.73	7939.3	5483.1	12.3136	14265.5	758.217	673.326	2517.58	41600.3	904.918	4125.56	178.358	772.732	387.35	369.26	2678.56	25222.4	21646
Sc-M26B KB-1	Sc	Pos	Yes	No	High	High	Early	Long	Moderate	severe	nan	Impairment	Severe	Poly	No	Typical	590.508	-546.196	138.154	7842.86	6564.71	1465.41	1387.22	157.402	5633.93	123.469	472.626	176.213	12046.2	950.418	8384.9	715.567	2306.85	6260.56	73.6235	19610.7	-3326.29	-3334.12	1865.37	10438.7	390.767	5287.16	-162.77	104.753	386.049	172.717	3651.92	25768.5	27024.7
Sc-M27R KB-1	Sc	Pos	Yes	No	Low	High	Early	Short	Moderate	Critical	NegHigh	Impairment	Mild	Poly	Yes	Atypical	-762.053	126.145	-166.345	-4540.39	-4673.13	-1119.88	-1293.39	-134.191	-2194.18	628.128	-152.968	-1998	-9388.79	-338.182	-7117.01	-704.434	-1669.5	-3852.32	-224.566	-10659	-3310.88	-3935.97	-1058.07	-6814.29	-463.703	-1591.5	829.951	-355.922	-333.51	-107.774	-857.133	-11160	-12297.9
Sc-M28K KB-1	Sc	Pos	Yes	No	Low	High	Late	Short	Complicated	Critical	nan	Impairment	Mild	Mono	No	Typical	-766.837	-411.986	-268.22	-2766.07	-2699.93	-658.607	-769.992	-300.816	-1542.45	452.594	-123.883	-87.1424	-6630.79	-396.574	-7351.15	-481.236	-1740.95	-3507.45	31.8213	-7620.18	-5178.96	-5491.97	-1078.53	-9596.04	-275.181	-940	372.741	-334.982	-263.245	-129.094	-474.446	-8951.89	-9753.97
Sc-M29K KB-1	Sc	Pos	Yes	No	High	High	Late	Short	Moderate	Critical	nan	normal	Mild	Mono	No	Typical	-705.846	1274.67	-186.608	-2858.48	-2512.01	-272.422	-677.458	-86.9808	-1649.84	-14.7632	-102.962	531.437	-10056.5	-87.3631	-6385.33	-359.375	-1484.55	-2969.21	-82.4381	-6551.13	-4713.48	-4890.12	-1113.06	-8258.36	481.356	-1879.38	-306.23	-385.238	-155.246	-177.197	-224.867	-9107.94	-8445.64
Sc-M30K KB-1	Sc	Neg	Yes	Yes	High	High	Early	Long	Moderate	Critical	NegHigh	Impairment	Mild	Poly	Yes	Typical	-604.195	-697.183	-241.485	-2803.04	-3000.61	-229.513	-1370.31	482.32	-1361.01	-183.714	-165.725	1229.63	-1985.74	-226.442	-7458.46	-282.41	-1816.61	-2769.87	-171.616	-3353.9	-4759.72	-4934.16	-564.437	-7726.34	371.18	-162.237	-250.927	-100.457	-287.968	-158.942	107.904	-6611.19	-6846.57
Sc-M31R KB-1	Sc	Pos	Yes	No	High	High	Early	Short	Moderate	Critical	NegHigh	normal	Mild	Mono	No	Typical	-238.25	-1187.57	-67.0029	-1823.47	-2042.2	864.678	-1041.81	526.753	-527.835	474.536	-136.129	341.576	820.65	164.783	2043.65	805.359	100.101	-1214.96	265.914	4663.93	-1831.21	-2101.06	-238.331	-49.9188	-13.2089	1080.16	-215.062	247.144	661.901	-18.4967	-898.73	1347.21	858.042
Sc-M32K KB-1	Sc	Pos	Yes	Yes	Low	Low	Late	Long	Complicated	Critical	PosLow	normal	Mild	Poly	Yes	Typical	-778.796	-183.571	-179.853	-4059.84	-4391.24	-1162.79	-1484.82	107.415	-990.708	-111.307	-164.705	-350.498	-8933.96	-259.353	-9536.44	-699.303	-2257.96	-3786.54	-324.891	-7778.55	-5804.74	-6267.04	-1157.82	-11169.3	-157.661	-1707.66	794.36	-376.862	-332.208	-119.766	-191.59	-8717.82	-8954.44
Sc-M33K KB-1	Sc	Pos	Yes	Yes	High	Low	Late	Long	Moderate	Critical	PosLow	Impairment	Severe	Poly	No	Typical	-801.518	-41.618	-152.274	-3985.91	-3902.64	-444.06	-1517.21	46.3189	-1457.28	-258.316	-187.667	65.9712	-9185.57	-177.605	-9224.26	-654.407	-2026.78	-3738.69	-143.748	-6749.1	-5719.97	-6162.82	-1171.25	-11055.3	-0.967245	-1793.52	-242.713	-385.238	-337.413		274.29	-7625.49	-9608.6
Sc-M34K KB-1	Sc	Pos	Yes	No	High	Low	Early	Long	Complicated	Critical	PosLow	Impairment	Mild	Poly	No	Typical	-795.539	1094.01	-248.239	-2433.39	-2117.37	-283.149	-1070.73	-328.587	-1679.46	-370.218	-217.773	886.66	-5759.84	32.0747	-7204.81	-562.049	-1572.82	-2590.45	79.1971	-6679.81	-4805.96	-4934.16	-647.562	-7802.34	-250.698	-1268.28	-247.641	-372.674	-113.608	-95.7815	116.224	-8093.63	-8009.53
Sc-M35R KB-1	Sc	Pos	Yes	Yes	Low	Low	Early	Long	Complicated	Critical	PosLow	normal	Mild	Poly	No	Typical	-588.648	-479.091	-185.2	-3061.79	-3113.36	-272.422	-1285.29	-245.274	-2083.09	-425.072	17.9729	617.18	-2276.05	-217.418	-6492.64	-374.768	-1471.94	-3148.63	-294.236	-6660.02	-5052.57	-5301.14	-1159.74	-9048.81	-304.561	-722.832	-321.835	-261.693	202.581	140.737	-715.705	-9107.94	-8809.07
Sc-M36R KB-1	Sc	Pos	Yes	Yes	High	Low	Late	Short	Complicated	Critical	PosLow	Impairment	Severe	Poly	Yes	Typical	-282.498	-926.888	565.917	542.289	306.849	-358.241	-243.703	-314.701	968.17	-1427.81	52.1612	2019.7	-6108.22		872.96	-270.865	247.218	738.642	-533.902	9613.21	-2663.52	-2732.27	-91.2638	-201.927	-184.593	878.148	-195.897	23.088	-66.7655	6.82072	-715.705	8525.36	6672.84
Sc-M37R KB-1	Sc	Pos	Yes	No	Low	Low	Late	Long	Complicated	Critical	PosLow	Impairment	Severe	Poly	Yes	Atypical	985.155	-664.921	-30.6994	5236.83	5850.6	1755.05	4863.04	462.881	5152.54	-725.673	20.5243	-246.381	-1405.1		12287.2	292.26	2895.31	8094.55	-277.515	13374.7	11424.2	10714	-442.946	19103.1	141.036	1615.51	90.7492	356.031	172.654	176.714	1954.79	16951.9	17357.5
Sc-M38U KB-1	Sc	Pos	Yes	Yes	Low	Low	Early	Long	Complicated	Critical	PosLow	Impairment	Severe	Poly	No	Typical	112.149	-2.90358	605.316	15346.7	14758.2	1690.69	1132.75	104.638	4078.67	-403.131	360.366	4500.14	14368.7	432.855	10140.9	138.331	2937.34	6898.47	299.355	18818.9	-3696.21	-3994.69	1494.5	17887.1	429.94	4630.6	-54.3535	469.105	380.844	113.42	4084.52	24832.3	29714
Sc-M39U KB-1	Sc	Pos	Yes	No	Low	Low	Late	Long	Moderate	Critical	nan	Impairment	Severe	Poly	No	Typical	985.155	-729.445	-175.913	375.947	-501.223	1283.05	456.089	-73.0954	2190.15	-1052.6	513.448	-993.575	-5953.39	-172.297	6141.07	-790.378	1087.88	1755.31	51.329	7039.58	-2077.82	-2071.7	835.899	11958.7	-385.357	761.988	-211.229	54.4977	-62.862	-17.8305	1788.4	9617.69	10815.9
Sc-M40R KB-1	Sc	Pos	Yes	Yes	High	High	Late	Short	Moderate	Critical	NegHigh	normal	Severe	Mono	No	Typical	-308.808	-148.728	19.9567	5754.34	6301.61	1647.78	-249.486	-45.3247	4856.3	-741.033	661.427	35.3485	143.246	369.155	12482.3	-2.77137	2390.91	4366.76	151.654	16443.2	-3125.92	-3818.54	1046.91	13478.8	194.9	2812.46	-238.059	575.898	-153.945	299.97	2720.16	23505.9	26370.5
Sc-M41K KB-1	Sc	Pos	Yes	Yes	Low	High	Late	Long	Moderate	Critical	NegHigh	Impairment	Mild	Poly	No	Typical	734.016	293.907	135.34	6438.19	6376.78	1433.23	172.702	432.333	5670.96	-789.304	355.263	-969.077	9917.21	528.405	3799.69	-268.3	852.496	5702.38	79.1971	16344.2	2145.41	2376.12	1302.68	11578.7	420.147	2307.41	-250.105	523.549	7.40233	94.7655	2620.33	21711.3	26007.1
[truncated: 155 more columns]

## Sheet: Sample_Metadata
Sample	Group	Symptoms	Response	Smoking	Cpz	PANSS	Onset	Duration	Hospitalization rate	BPRS	NegHighPosLow	MoCA	MADRS	Therapy	PANSS_total	PANSS_positive	PANSS_negative	PANSS_general	BPRS_total	MoCA_total	SHAPS_total	MADRS_total	sex	Nationality	age	illness_duration_yr	therapy_duration_days	CPZeq_mg
Contr-1-KB-1	Control	nan	nan	nan	nan	nan	nan	Нет значимых метаболитов	Нет значимых метаболитов	nan	Нет значимых метаболитов	nan	Нет значимых метаболитов	nan	1e-08	1e-08	1e-08	1e-08	1e-08	1e-08	1e-08	1e-08	F	1	30	1e-08	1e-08	1e-08
Contr-10-KB-1	Control	nan	nan	nan	nan	nan	nan	nan	nan	nan	nan	nan	nan	nan	1e-08	1e-08	1e-08	1e-08	1e-08	1e-08	1e-08	1e-08	F	1	37	1e-08	1e-08	1e-08
Contr-11-KB-1	Control	nan	nan	nan	nan	nan	nan	nan	nan	nan	nan	nan	nan	nan	1e-08	1e-08	1e-08	1e-08	1e-08	1e-08	1e-08	1e-08	F	1	33	1e-08	1e-08	1e-08
Contr-12-KB-1	Control	nan	nan	nan	nan	nan	nan	nan	nan	nan	nan	nan	nan	nan	1e-08	1e-08	1e-08	1e-08	1e-08	1e-08	1e-08	1e-08	F	5	39	1e-08	1e-08	1e-08
Contr-13-KB-1	Control	nan	nan	nan	nan	nan	nan	nan	nan	nan	nan	nan	nan	nan	1e-08	1e-08	1e-08	1e-08	1e-08	1e-08	1e-08	1e-08	F	1	42	1e-08	1e-08	1e-08
Contr-14-KB-1	Control	nan	nan	nan	nan	nan	nan	nan	nan	nan	nan	nan	nan	nan	1e-08	1e-08	1e-08	1e-08	1e-08	1e-08	1e-08	1e-08	F	1	45	1e-08	1e-08	1e-08
Contr-15-KB-1	Control	nan	nan	nan	nan	nan	nan	nan	nan	nan	nan	nan	nan	nan	1e-08	1e-08	1e-08	1e-08	1e-08	1e-08	1e-08	1e-08	F	2	51	1e-08	1e-08	1e-08
Contr-16-KB-1	Control	nan	nan	nan	nan	nan	nan	nan	nan	nan	nan	nan	nan	nan	1e-08	1e-08	1e-08	1e-08	1e-08	1e-08	1e-08	1e-08	F		25	1e-08	1e-08	1e-08
Contr-17-KB-1	Control	nan	nan	nan	nan	nan	nan	nan	nan	nan	nan	nan	nan	nan	1e-08	1e-08	1e-08	1e-08	1e-08	1e-08	1e-08	1e-08	F	1	52	1e-08	1e-08	1e-08
Contr-18-KB-1	Control	nan	nan	nan	nan	nan	nan	nan	nan	nan	nan	nan	nan	nan	1e-08	1e-08	1e-08	1e-08	1e-08	1e-08	1e-08	1e-08	F	1	46	1e-08	1e-08	1e-08
Contr-19-KB-1	Control	nan	nan	nan	nan	nan	nan	nan	nan	nan	nan	nan	nan	nan	1e-08	1e-08	1e-08	1e-08	1e-08	1e-08	1e-08	1e-08	F	2	69	1e-08	1e-08	1e-08
Contr-2-KB-1	Control	nan	nan	nan	nan	nan	nan	nan	nan	nan	nan	nan	nan	nan	1e-08	1e-08	1e-08	1e-08	1e-08	1e-08	1e-08	1e-08	F	1	49	1e-08	1e-08	1e-08
Contr-20-KB-1	Control	nan	nan	nan	nan	nan	nan	nan	nan	nan	nan	nan	nan	nan	1e-08	1e-08	1e-08	1e-08	1e-08	1e-08	1e-08	1e-08	M	1	34	1e-08	1e-08	1e-08
Contr-21-KB-1	Control	nan	nan	nan	nan	nan	nan	nan	nan	nan	nan	nan	nan	nan	1e-08	1e-08	1e-08	1e-08	1e-08	1e-08	1e-08	1e-08	M	5	27	1e-08	1e-08	1e-08
Contr-22-KB-1	Control	nan	nan	nan	nan	nan	nan	nan	nan	nan	nan	nan	nan	nan	1e-08	1e-08	1e-08	1e-08	1e-08	1e-08	1e-08	1e-08	F	2	61	1e-08	1e-08	1e-08
Contr-23-KB-1	Control	nan	nan	nan	nan	nan	nan	nan	nan	nan	nan	nan	nan	nan	1e-08	1e-08	1e-08	1e-08	1e-08	1e-08	1e-08	1e-08	F	2	53	1e-08	1e-08	1e-08
Contr-24-KB-1	Control	nan	nan	nan	nan	nan	nan	nan	nan	nan	nan	nan	nan	nan	1e-08	1e-08	1e-08	1e-08	1e-08	1e-08	1e-08	1e-08	M	2	26	1e-08	1e-08	1e-08
Contr-25-KB-1	Control	nan	nan	nan	nan	nan	nan	nan	nan	nan	nan	nan	nan	nan	1e-08	1e-08	1e-08	1e-08	1e-08	1e-08	1e-08	1e-08	F	6	26	1e-08	1e-08	1e-08
Contr-26-KB-1	Control	nan	nan	nan	nan	nan	nan	nan	nan	nan	nan	nan	nan	nan	1e-08	1e-08	1e-08	1e-08	1e-08	1e-08	1e-08	1e-08	F	1	45	1e-08	1e-08	1e-08
Contr-27-KB-1	Control	nan	nan	nan	nan	nan	nan	nan	nan	nan	nan	nan	nan	nan	1e-08	1e-08	1e-08	1e-08	1e-08	1e-08	1e-08	1e-08	F	1	67	1e-08	1e-08	1e-08
Contr-28-KB-1	Control	nan	nan	nan	nan	nan	nan	nan	nan	nan	nan	nan	nan	nan	1e-08	1e-08	1e-08	1e-08	1e-08	1e-08	1e-08	1e-08	F	5	27	1e-08	1e-08	1e-08
Contr-29-KB-1	Control	nan	nan	nan	nan	nan	nan	nan	nan	nan	nan	nan	nan	nan	1e-08	1e-08	1e-08	1e-08	1e-08	1e-08	1e-08	1e-08	M	1	27	1e-08	1e-08	1e-08
Contr-3-KB-1	Control	nan	nan	nan	nan	nan	nan	nan	nan	nan	nan	nan	nan	nan	1e-08	1e-08	1e-08	1e-08	1e-08	1e-08	1e-08	1e-08	M	1	24	1e-08	1e-08	1e-08
Contr-30-KB-1	Control	nan	nan	nan	nan	nan	nan	nan	nan	nan	nan	nan	nan	nan	1e-08	1e-08	1e-08	1e-08	1e-08	1e-08	1e-08	1e-08	M	2	26	1e-08	1e-08	1e-08
Contr-31-KB-1	Control	nan	nan	nan	nan	nan	nan	nan	nan	nan	nan	nan	nan	nan	1e-08	1e-08	1e-08	1e-08	1e-08	1e-08	1e-08	1e-08	F	2	31	1e-08	1e-08	1e-08
Contr-32-KB-1	Control	nan	nan	nan	nan	nan	nan	nan	nan	nan	nan	nan	nan	nan	1e-08	1e-08	1e-08	1e-08	1e-08	1e-08	1e-08	1e-08	F	1	38	1e-08	1e-08	1e-08
Contr-33-KB-1	Control	nan	nan	nan	nan	nan	nan	nan	nan	nan	nan	nan	nan	nan	1e-08	1e-08	1e-08	1e-08	1e-08	1e-08	1e-08	1e-08	F	1	30	1e-08	1e-08	1e-08
Contr-34-KB-1	Control	nan	nan	nan	nan	nan	nan	nan	nan	nan	nan	nan	nan	nan	1e-08	1e-08	1e-08	1e-08	1e-08	1e-08	1e-08	1e-08	F	1	21	1e-08	1e-08	1e-08
Contr-35-KB-1	Control	nan	nan	nan	nan	nan	nan	nan	nan	nan	nan	nan	nan	nan	1e-08	1e-08	1e-08	1e-08	1e-08	1e-08	1e-08	1e-08	F	2	38	1e-08	1e-08	1e-08
Contr-36-KB-1	Control	nan	nan	nan	nan	nan	nan	nan	nan	nan	nan	nan	nan	nan	1e-08	1e-08	1e-08	1e-08	1e-08	1e-08	1e-08	1e-08	M	1	35	1e-08	1e-08	1e-08
Contr-37-KB-1	Control	nan	nan	nan	nan	nan	nan	nan	nan	nan	nan	nan	nan	nan	1e-08	1e-08	1e-08	1e-08	1e-08	1e-08	1e-08	1e-08	F	2	63	1e-08	1e-08	1e-08
Contr-38-KB-1	Control	nan	nan	nan	nan	nan	nan	nan	nan	nan	nan	nan	nan	nan	1e-08	1e-08	1e-08	1e-08	1e-08	1e-08	1e-08	1e-08	F	2	39	1e-08	1e-08	1e-08
Contr-39-KB-1	Control	nan	nan	nan	nan	nan	nan	nan	nan	nan	nan	nan	nan	nan	1e-08	1e-08	1e-08	1e-08	1e-08	1e-08	1e-08	1e-08	F	1	49	1e-08	1e-08	1e-08
Contr-4-KB-1	Control	nan	nan	nan	nan	nan	nan	nan	nan	nan	nan	nan	nan	nan	1e-08	1e-08	1e-08	1e-08	1e-08	1e-08	1e-08	1e-08	F	1	41	1e-08	1e-08	1e-08
Contr-40-KB-2	Control	nan	nan	nan	nan	nan	nan	nan	nan	nan	nan	nan	nan	nan	1e-08	1e-08	1e-08	1e-08	1e-08	1e-08	1e-08	1e-08	F	2	44	1e-08	1e-08	1e-08
Contr-5-KB-1	Control	nan	nan	nan	nan	nan	nan	nan	nan	nan	nan	nan	nan	nan	1e-08	1e-08	1e-08	1e-08	1e-08	1e-08	1e-08	1e-08	M	1	65	1e-08	1e-08	1e-08
Contr-6-KB-1	Control	nan	nan	nan	nan	nan	nan	nan	nan	nan	nan	nan	nan	nan	1e-08	1e-08	1e-08	1e-08	1e-08	1e-08	1e-08	1e-08	F	1	36	1e-08	1e-08	1e-08
Contr-7-KB-1	Control	nan	nan	nan	nan	nan	nan	nan	nan	nan	nan	nan	nan	nan	1e-08	1e-08	1e-08	1e-08	1e-08	1e-08	1e-08	1e-08	M	5	29	1e-08	1e-08	1e-08
Contr-8-KB-1	Control	nan	nan	nan	nan	nan	nan	nan	nan	nan	nan	nan	nan	nan	1e-08	1e-08	1e-08	1e-08	1e-08	1e-08	1e-08	1e-08	F	1	27	1e-08	1e-08	1e-08
Contr-9-KB-1	Control	nan	nan	nan	nan	nan	nan	nan	nan	nan	nan	nan	nan	nan	1e-08	1e-08	1e-08	1e-08	1e-08	1e-08	1e-08	1e-08	M	5	26	1e-08	1e-08	1e-08
Sc-F10R KB-1	Sc	Neg	Yes	No	Low	Low	Early	Long	Complicated	severe	nan	Impairment	Mild	Mono	39	13	18	70	57	17	8	14	F	2	42	23	21	300
Sc-F11R KB-1	Sc	Neg	Yes	No	Low	Low	Early	Short	Moderate	severe	PosLow	normal	Severe	Mono	50	19	13	82	55	29	7	29	F	2	33	15	560
Sc-F12X KB-1	Sc	Neg	No	No	High	Low	Early	Short	Moderate	severe	nan	Impairment	Severe	Mono	65	14	39	104	55	13	7	28	F		30	8	5	959
Sc-F13R KB-1	Sc	Neg	No	No	Low	High	Late	Short	Moderate	severe	NegHigh	Impairment	Severe	Mono	65	23	39	127	65	19	7	29	F	2	47	11	21	359.4
Sc-F14K KB-1	Sc	Neg	Yes	No	Low	High	Late	Short	Complicated	severe	NegHigh	Impairment	Severe	Mono	67	21	41	129	65	21	8	28	F	1	58	3	28	300
Sc-F15R KB-1	Sc	Neg	No	No	Low	High	Late	Short	Moderate	severe	NegHigh	Impairment	Severe	Mono	68	25	34	127	57	19	7	22	F	2	48	10	21	454.5
Sc-F16K KB-1	Sc	Neg	Yes	No	High	High	Late	Short	Complicated	Critical	NegHigh	Impairment	Severe	Poly	76	30	42	148	66	18	11	35	F	1	47	22	21	1383.5
Sc-F17R KB-1	Sc	Pos	No	No	Low	nan	Late	Short	Complicated	severe	nan	normal	Mild	Mono					65	27	3	19	F	2	38	14	7	359.4
Sc-F18R KB-1	Sc	Pos	Yes	No	Low	Low	Early	Short	Moderate	Critical	PosLow	normal	Mild	Mono	49	28	17	94	68	27	3	6	F	2	38	15	28	375
Sc-F1K KB-1	Sc	Neg	Yes	Yes	High	High	Late	Long	Complicated	severe	NegHigh	Impairment	Mild	Mono	68	23	41	132	58	11	9	16	F	1	65	26	3	2752
Sc-F2K KB-1	Sc	Neg	Yes	Yes	Low	High	Early	Long	Moderate	severe	NegHigh	Impairment	Mild	Mono	62	19	29	110	64	19	7	21	F	1	61	43	11	300
Sc-F3K KB-1	Sc	Neg	Yes	No	High	High	Early	Short	Complicated	Critical	NegHigh	normal	Severe	Poly	70	28	41	139	75	28	14	23	F	1	22	8	36	1162.5
Sc-F4R KB-1	Sc	Neg	Yes	No	High	High	Early	Long	Moderate	Critical	NegHigh	Impairment	Mild	Poly	68	27	36	131	88	21	9	13	F	2	53	31	40	2777
Sc-F5K KB-1	Sc	Neg	Yes	No	High	High	Late	Long	Complicated	Critical	NegHigh	Impairment	Mild	Mono	42	18	47	107	70	24	2	13	F	1	58	29	8	600
Sc-F6K KB-1	Sc	Pos	Yes	No	High	Low	Early	Long	Complicated	Critical	nan	normal	Severe	Mono	50	21	27	98	66	26	7	22	F	1	59	30	105	562.5
Sc-F7K KB-1	Sc	Neg	No	No	Low	High	Late	Long	Complicated	severe	NegHigh	Impairment	Severe	Poly	63	24	31	118	63	13	14	29	F	1	69	26	32	325
Sc-F8K KB-1	Sc	Pos	Yes	No	High	High	Late	Long	Moderate	Critical	NegHigh	Impairment	Severe	Poly	57	24	28	109	67	11	12	25	F	1	62	23	104	612.5
Sc-F9R KB-1	Sc	Pos	Yes	No	High	Low	Early	Short	Complicated	severe	PosLow	Impairment	Severe	Mono	50	24	16	90	45	23	6	22	F	2	45	22	7	1363.5
Sc-M19R KB-1	Sc	Pos	No	Yes	High	High	Early	Long	Complicated	severe	nan	Impairment	Severe	Poly	65	58	30	153	58	25	7	33	M	2	53	33	56	1225
Sc-M20R KB-1	Sc	Pos	No	Yes	Low	High	Early	Long	Moderate	severe	nan	normal	Severe	Poly	61	50	36	147	58	26	12	26	M	2	51	33	63	345
Sc-M21K KB-1	Sc	Pos	No	Yes	High	High	Early	Long	Moderate	severe	nan	Impairment	Severe	Mono	53	48	38	139	58	24	6	28	M	1	48	25	84	1125
Sc-M22K KB-1	Sc	Pos	Yes	Yes	Low	High	Late	Long	Complicated	severe	nan	Impairment	Mild	Mono	51	46	42	139	58	24	14	14	M	1	62	28	28	160
Sc-M23T KB-1	Sc	Pos	Yes	Yes	High	High	Early	Long	Complicated	severe	nan	normal	Severe	Poly	67	60	28	155	58	26	12	32	M	3	46	26	84	1225
Sc-M24A KB-1	Sc	Pos	Yes	No	Low	High	Late	Short	Complicated	severe	nan	Impairment	Severe	Poly	43	46	40	129	58	25	14	31	M	4	36	11	14	345
Sc-M25K KB-1	Sc	Pos	Yes	No	Low	High	Late	Short	Moderate	severe	nan	normal	Mild	Poly	51	48	38	137	57	28	9	17	M	1	50	4	14	185
Sc-M26B KB-1	Sc	Pos	Yes	No	High	High	Early	Long	Moderate	severe	nan	Impairment	Severe	Poly	53	50	37	140	60	25	7	29	M	5	42	23	21	1225
Sc-M27R KB-1	Sc	Pos	Yes	No	Low	High	Early	Short	Moderate	Critical	NegHigh	Impairment	Mild	Poly	76	23	41	140	73	25	9	16	M	2	32	14	140	350
Sc-M28K KB-1	Sc	Pos	Yes	No	Low	High	Late	Short	Complicated	Critical	nan	Impairment	Mild	Mono	29	46	42	117	68	24	7	11	M	1	36	5	28	450
Sc-M29K KB-1	Sc	Pos	Yes	No	High	High	Late	Short	Moderate	Critical	nan	normal	Mild	Mono	28	40	39	107	99	28	8	11	M	1	38	6	28	1125
Sc-M30K KB-1	Sc	Neg	Yes	Yes	High	High	Early	Long	Moderate	Critical	NegHigh	Impairment	Mild	Poly	65	32	47	144	82	23	11	8	M	1	54	31	350	1325
Sc-M31R KB-1	Sc	Pos	Yes	No	High	High	Early	Short	Moderate	Critical	NegHigh	normal	Mild	Mono	60	25	28	113	73	28	8	11	M	2	32	15	546	750
Sc-M32K KB-1	Sc	Pos	Yes	Yes	Low	Low	Late	Long	Complicated	Critical	PosLow	normal	Mild	Poly	50	19	13	82	110	26	5	19	M	1	32	27	98	475
Sc-M33K KB-1	Sc	Pos	Yes	Yes	High	Low	Late	Long	Moderate	Critical	PosLow	Impairment	Severe	Poly	49	20	12	81	125	24	10	26	M	1	36	26	168	800
Sc-M34K KB-1	Sc	Pos	Yes	No	High	Low	Early	Long	Complicated	Critical	PosLow	Impairment	Mild	Poly	48	18	13	79	100	24	9	17	M	1	38	32	140	775
Sc-M35R KB-1	Sc	Pos	Yes	Yes	Low	Low	Early	Long	Complicated	Critical	PosLow	normal	Mild	Poly	48	20	15	83	80	27	13	8	M	2	54	28	336	125
Sc-M36R KB-1	Sc	Pos	Yes	Yes	High	Low	Late	Short	Complicated	Critical	PosLow	Impairment	Severe	Poly	48	20	13	81	135	23	13	38	M	2	32	15	35	850
Sc-M37R KB-1	Sc	Pos	Yes	No	Low	Low	Late	Long	Complicated	Critical	PosLow	Impairment	Severe	Poly	47	19	12	78	81	21	11	27	M	2	32	37	7	115
Sc-M38U KB-1	Sc	Pos	Yes	Yes	Low	Low	Early	Long	Complicated	Critical	PosLow	Impairment	Severe	Poly	50	20	14	84	135	25	9	30	M	6	36	25	14	235
Sc-M39U KB-1	Sc	Pos	Yes	No	Low	Low	Late	Long	Moderate	Critical	nan	Impairment	Severe	Poly	54	20	27	101	120	24	13	23	M	6	38	29	56	235
Sc-M40R KB-1	Sc	Pos	Yes	Yes	High	High	Late	Short	Moderate	Critical	NegHigh	normal	Severe	Mono	53	27	28	108	120	26	14	32	M	2	54	21	21	909
Sc-M41K KB-1	Sc	Pos	Yes	Yes	Low	High	Late	Long	Moderate	Critical	NegHigh	Impairment	Mild	Poly	57	25	32	114	102	20	11	19	M	1	51	27	7	400

## Sheet: SCZ_vs_Control_Stats
metabolite	n_sc	n_ct	missing_pct	mean_sc	mean_ct	mean_diff	welch_t	welch_p	bf10	mwu_u	mwu_p	cohen_d	d_ci_low	d_ci_high	welch_fdr	mwu_fdr	high_missing_flag	beta_group	beta_group_se	t_group	p_group	beta_age	p_age	beta_sex	p_sex	n_used	fdr_group_adj
Plasmalogen(p16:0/20:4)	38	40	3.7037	-243.771	231.583	-475.354	-5.31409	1.44902e-06	13310	242.5	2.36096e-07	-1.1889	-1.66175	-0.791541	0.000247782	4.03724e-05	FALSE	-376.617	95.3443	-3.95008	0.000176672	-143.946	0.00270324	-89.9857	0.353933	78	0.0302109
PC(16:0/18:2)	41	40	0	-604.757	619.876	-1224.63	-4.72657	1.21024e-05	1751.75	334	4.51152e-06	-1.05565	-1.54496	-0.64927	0.00103475	0.000385735	FALSE	-992.082	283.825	-3.4954	0.000788666	-252.531	0.0712243	-359.94	0.21155	81	0.0674309
Hypoxanthine	41	40	0	208.071	-213.272	421.343	2.339	0.0238431	2.397	1181	0.000660507	0.51409	0.302092	0.811296	0.261284	0.0161352	FALSE	629.824	197.654	3.1865	0.00208086	-119.749	0.216678	-486.483	0.0167694	81	0.118609
Phosphorylcholine	32	40	11.1111	-562.36	449.888	-1012.25	-3.95292	0.00018242	131.705	310.5	0.000192669	-0.911083	-1.42298	-0.475433	0.0103979	0.00854356	FALSE	-753.891	269.3	-2.79945	0.00665635	-419.476	0.00281002	-328.743	0.239303	72	0.284559
2-Octenoylcarnitine	41	40	0	-236.127	242.03	-478.157	-3.35204	0.00128879	25.34	434	0.000270981	-0.747868	-1.24151	-0.320258	0.0478543	0.00926755	FALSE	-413.589	157.175	-2.6314	0.0102678	-130.736	0.0912631	-6.82831	0.965688	81	0.35116
Tryptophan	41	40	0	-285.015	292.14	-577.155	-2.80298	0.00654023	6.446	531	0.00641884	-0.625507	-1.07323	-0.201505	0.139798	0.0914685	FALSE	-519.82	230.136	-2.25875	0.0267286	-102.579	0.362303	-26.8149	0.908154	81	0.380882
Cholesterol	32	39	12.3457	-166.591	136.69	-303.28	-3.33032	0.00139925	23.124	315.5	0.000371681	-0.784677	-1.32058	-0.336728	0.0478543	0.0105929	FALSE	-246.841	101.043	-2.44293	0.0172111	-89.867	0.0697949	-62.9522	0.538182	71	0.380882
1-Methylnicotinamide	41	40	0	192.276	-197.083	389.359	2.36995	0.0223205	2.547	1156	0.00152757	0.520649	0.369551	1.11418	0.261284	0.0290238	FALSE	424.322	183.582	2.31135	0.0234897	79.9957	0.373098	-235.296	0.20677	81	0.380882
Xanthine	41	40	0	108.515	-111.227	219.742	2.93175	0.00482235	8.722	1112.5	0.00580772	0.646472	0.308214	1.03721	0.117803	0.0902836	FALSE	211.238	84.6606	2.49511	0.0147322	35.2703	0.394354	-26.8257	0.75379	81	0.380882
Azelaic acid	38	38	6.17284	703.942	-703.942	1407.88	1.62528	0.108355	0.737	794.5	0.454449	0.372864	-0.0005304	0.593376	0.514687	0.842799	FALSE	2168.22	956.373	2.26713	0.0263857	-578.554	0.211321	-1539.2	0.115406	76	0.380882
Nicotinic acid	41	40	0	-35.1113	35.989	-71.1003	-2.40957	0.0188177	2.757	605	0.0427364	-0.53848	-0.923446	-0.120093	0.261284	0.249138	FALSE	-75.7896	33.0941	-2.29013	0.0247523	4.4737	0.781809	8.20818	0.806039	81	0.380882
PI(38:4)	40	40	1.23457	-232.136	232.136	-464.272	-3.1582	0.0022583	15.238	413	0.000199849	-0.706195	-1.34992	-0.239909	0.0643616	0.00854356	FALSE	-367.01	159.922	-2.29494	0.0244976	-179.844	0.0234492	-21.9627	0.891597	80	0.380882
Methylguanidine	40	40	1.23457	-148.631	148.631	-297.262	-1.73734	0.0862743	0.853	630.5	0.103894	-0.388481	-0.879088	0.0551557	0.4759	0.428984	FALSE	-411.2	192.426	-2.13692	0.0358216	127.436	0.173352	157.572	0.41737	80	0.471192
Homoarginine	41	40	0	-161.625	165.666	-327.291	-2.12991	0.0367623	1.619	639	0.0881766	-0.475504	-0.951807	-0.054968	0.285744	0.38662	FALSE	-293.035	172.201	-1.7017	0.0928455	-52.2533	0.53455	-29.9004	0.863506	81	0.561588
Dimethylglycine	41	40	0	-361.698	370.741	-732.439	-1.93503	0.0566743	1.158	514.5	0.00396181	-0.430839	-0.914975	-0.00653448	0.387652	0.0677469	FALSE	-813.701	419.783	-1.93839	0.0562413	-142.093	0.488562	479.561	0.259959	81	0.561588
5-Hydroxyindoleacetic acid	41	40	0	-63.1502	64.7289	-127.879	-1.45855	0.148667	0.58	650.5	0.110382	-0.32428	-0.773441	0.108833	0.620052	0.428984	FALSE	-154.57	97.262	-1.58922	0.11611	69.6838	0.144819	-21.1991	0.829157	81	0.561588
Asparagine	41	40	0	-351.944	360.742	-712.686	-2.57018	0.0127226	3.846	551.5	0.0113513	-0.575258	-0.938295	-0.202126	0.212735	0.125417	FALSE	-564.091	302.75	-1.86322	0.0662442	49.1506	0.739449	-553.327	0.0733276	81	0.561588
Suberylcarnitine	39	40	2.46914	98.8406	-96.3696	195.21	0.985148	0.330736	0.356	773	0.949178	0.224533	-0.367113	0.441165	0.819651	1	FALSE	365.374	219.583	1.66395	0.100296	-123.447	0.249313	-334.24	0.133093	79	0.561588
Dodecanoylcarnitine	35	35	13.5802	80.0971	-80.0971	160.194	1.12595	0.264144	0.423	668.5	0.514442	0.269154	-0.228535	0.551217	0.805729	0.866169	FALSE	288.224	160.058	1.80074	0.0763127	-127.208	0.10454	-175.338	0.279359	70	0.561588
Linoleylcarnitine	21	30	37.037	261.498	-183.049	444.547	0.973696	0.341836	0.419	216	0.0593986	0.332566	-0.985242	0.620676	0.825242	0.293745	TRUE	638.617	407.763	1.56615	0.124023	-193.464	0.341597	-526.306	0.211838	51	0.561588
Oleoylcarnitine	26	38	20.9877	172.825	-118.249	291.074	0.962502	0.34501	0.383	394	0.173771	0.297212	-0.780016	0.555988	0.825242	0.550275	TRUE	411.284	266.543	1.54303	0.128082	-102.508	0.451136	-326.604	0.229136	64	0.561588
L-Palmitoylcarnitine	23	37	25.9259	133.696	-83.1082	216.804	0.960008	0.34747	0.394	360.5	0.326745	0.324845	-0.633118	0.615436	0.825242	0.730872	TRUE	335.879	194.784	1.72437	0.090158	-99.2218	0.288804	-246.099	0.210222	60	0.561588
Tyrosine	41	40	0	-622.361	637.92	-1260.28	-1.74183	0.0861541	0.856	599.5	0.0376879	-0.389085	-0.772457	0.0295208	0.4759	0.249138	FALSE	-1252.2	812.175	-1.54178	0.127226	-62.4881	0.874724	69.9856	0.932006	81	0.561588
Zymosterol	41	40	0	127.711	-130.904	258.615	0.85211	0.39674	0.317	940	0.258917	0.189466	-0.261675	0.622572	0.860236	0.681151	FALSE	530.809	334.899	1.58498	0.117069	-191.597	0.243119	-581.009	0.0888286	81	0.561588
Saccharopine	35	34	14.8148	-27.4875	28.2959	-55.7834	-1.53428	0.129736	0.672	474	0.148085	-0.369934	-0.863997	0.0864797	0.568842	0.506451	FALSE	-77.6287	40.7729	-1.90393	0.0613478	24.9853	0.20394	24.9113	0.536917	69	0.561588
3-Hydroxy-cis-5-tetradecenoylcarnitine	36	34	13.5802	29.9677	-31.7305	61.6981	0.993403	0.32716	0.375	656	0.609202	0.230941	-0.366669	0.484012	0.819651	0.936364	FALSE	122.503	73.0339	1.67734	0.098206	-43.826	0.216315	-108.795	0.143959	70	0.561588
L-Tryptophan	41	40	0	-1174.31	1203.67	-2377.99	-2.23648	0.0284962	1.969	597.5	0.0359709	-0.499079	-0.929157	-0.0904647	0.261284	0.249138	FALSE	-2021.19	1184.96	-1.70571	0.0920934	-650.176	0.262777	-148.701	0.901117	81	0.561588
Urea	41	40	0	-154.158	158.011	-312.169	-1.69498	0.0942425	0.799	609.5	0.0472805	-0.377703	-0.827657	0.0515641	0.479462	0.260805	FALSE	-388.132	206.3	-1.8814	0.0636971	76.4155	0.448647	126.905	0.542946	81	0.561588
Indole	41	40	0	-210.389	215.648	-426.037	-2.53024	0.0136847	3.534	576.5	0.0217036	-0.564837	-1.03048	-0.165111	0.212735	0.195332	FALSE	-366.212	187.999	-1.94795	0.0550659	-90.0615	0.327741	-54.05	0.775951	81	0.561588
Hydroxyproline	41	40	0	-206.875	212.046	-418.921	-1.20045	0.23473	0.432	749	0.505427	-0.268638	-0.609068	0.180097	0.787084	0.866169	FALSE	-610.102	384.397	-1.58717	0.116573	307.483	0.104126	142.505	0.71368	81	0.561588
Purine	41	40	0	-87.1893	89.369	-176.558	-2.25997	0.0270351	2.058	615	0.0533706	-0.504655	-0.930779	-0.0648979	0.261284	0.276557	FALSE	-159.175	87.6261	-1.81652	0.0731816	-10.6293	0.803717	-39.5733	0.654959	81	0.561588
Guanidinoacetic acid	41	40	0	-1884.59	1931.7	-3816.29	-1.68993	0.0952349	0.793	581	0.0242571	-0.37664	-0.809053	0.0517327	0.479462	0.207399	FALSE	-3961.16	2529.22	-1.56616	0.121412	-593.156	0.631049	1376.91	0.590207	81	0.561588
Indoleacrylic acid	41	40	0	-38.3049	39.2625	-77.5673	-1.84613	0.0688155	1.004	659	0.129469	-0.411332	-0.858845	0.0222816	0.420266	0.461233	FALSE	-86.9133	46.8819	-1.85388	0.0675865	-9.14866	0.689374	44.1054	0.35294	81	0.561588
Inosine	38	36	8.64198	69.6351	-73.5037	143.139	1.59583	0.116016	0.714	873.5	0.0409486	0.365603	-0.0803029	0.721093	0.522071	0.249138	FALSE	179.645	96.3913	1.8637	0.0665578	59.4129	0.223044	-196.22	0.0525908	74	0.561588
PI(38:3)	35	40	7.40741	-97.5923	85.3932	-182.986	-2.58272	0.0118293	3.972	397.5	0.00133989	-0.596626	-1.19475	-0.138196	0.212735	0.0286401	FALSE	-133.073	77.0788	-1.72646	0.0886145	-89.2909	0.0176975	-3.3443	0.965669	75	0.561588
L-Kynurenine	41	40	0	-117.838	120.784	-238.621	-1.68885	0.0953316	0.792	588	0.0287522	-0.376101	-0.82971	0.0552646	0.479462	0.213766	FALSE	-244.715	159.006	-1.53903	0.127896	22.6234	0.770669	-15.1516	0.924832	81	0.561588
Acetyllysine	41	40	0	-123.589	126.679	-250.269	-1.32734	0.188395	0.496	693	0.232064	-0.295691	-0.773265	0.136131	0.694837	0.66045	FALSE	-333.886	210.331	-1.58743	0.116514	12.8365	0.900473	249.171	0.24289	81	0.561588
Methionine sulfoxide	41	40	0	-114.061	116.912	-230.973	-2.06665	0.0428169	1.447	549.5	0.010751	-0.461949	-0.850537	-0.0365191	0.30507	0.125417	FALSE	-213.841	125.303	-1.70659	0.0919283	-6.6199	0.913786	-44.9259	0.722689	81	0.561588
Pyruvic acid	41	40	0	-139.516	143.004	-282.521	-2.06573	0.0422465	1.445	629.5	0.0726715	-0.460015	-0.89843	-0.0253581	0.30507	0.327022	FALSE	-272.957	151.226	-1.80496	0.0749905	-92.3372	0.213139	111.069	0.467849	81	0.561588
Vitamin K2	29	30	27.1605	20.7288	-20.0378	40.7666	0.766088	0.448185	0.338	454	0.779081	0.201715	-0.359393	0.594468	0.860236	0.97243	TRUE	88.809	59.4903	1.49283	0.141196	-23.8748	0.398039	-107.166	0.0759756	59	0.603613
L-Phenylalanine	41	40	0	-457.633	469.073	-926.706	-1.41633	0.160653	0.551	649.5	0.108278	-0.315074	-0.776418	0.101532	0.636848	0.428984	FALSE	-1070.06	736.563	-1.45277	0.150351	166.61	0.643197	205.065	0.782854	81	0.627074
L-Threonine	41	40	0	-186.03	190.681	-376.711	-2.21487	0.0299257	1.891	600.5	0.0385573	-0.493979	-0.923946	-0.104455	0.261284	0.249138	FALSE	-264.498	187.126	-1.41348	0.161546	-169.037	0.0670984	-101.211	0.592612	81	0.643734
L-Valine	41	40	0	-381.435	390.971	-772.407	-1.4693	0.145806	0.588	584.5	0.0264226	-0.327024	-0.807275	0.0974845	0.620052	0.209137	FALSE	-832.767	589.63	-1.41235	0.161875	-110.712	0.700528	364.145	0.541355	81	0.643734
L-Tyrosine	41	40	0	-459.744	471.237	-930.981	-1.59235	0.115891	0.692	620.5	0.0601233	-0.355485	-0.777644	0.0779336	0.522071	0.293745	FALSE	-906.997	656.549	-1.38146	0.171133	-74.711	0.815638	37.6261	0.954748	81	0.665085
Creatine	41	40	0	-1619.9	1660.4	-3280.3	-2.20877	0.0305595	1.869	554	0.0121395	-0.493195	-0.925078	-0.0866554	0.261284	0.125417	FALSE	-2169.94	1615.07	-1.34356	0.183038	-20.1305	0.979622	-3539.63	0.0325346	81	0.695544
Malonylcarnitine	41	40	0	-32.0354	32.8363	-64.8717	-0.789225	0.432504	0.303	606	0.0437084	-0.174771	-0.671024	0.237878	0.860236	0.249138	FALSE	-119.04	91.8701	-1.29574	0.198935	59.9951	0.183328	82.0401	0.37779	81	0.701993
N-acetyl-L-alanine	41	40	0	-1501.03	1538.55	-3039.58	-2.1455	0.0354774	1.665	555	0.0124684	-0.479056	-0.887965	-0.0758276	0.285744	0.125417	FALSE	-2030.44	1544.01	-1.31504	0.192398	5.16175	0.994534	-3253.01	0.0396489	81	0.701993
L-Carnitine	41	40	0	-661.409	677.944	-1339.35	-1.09619	0.27634	0.39	675	0.172246	-0.243329	-0.735536	0.188386	0.805729	0.550275	FALSE	-1754.99	1371.24	-1.27986	0.204437	-7.1862	0.991431	1347.61	0.331989	81	0.701993
Pyroglutamic acid	39	39	3.7037	10.1681	-10.1681	20.3363	0.783556	0.435736	0.307	824.5	0.525689	0.177441	-0.293537	0.631729	0.860236	0.866169	FALSE	36.5279	28.7106	1.27228	0.207257	-21.0874	0.141668	-22.0863	0.44929	78	0.701993
Hexanoylcarnitine	41	40	0	105.744	-108.388	214.132	1.0215	0.311173	0.364	819.5	1	0.225325	-0.23559	0.574423	0.818624	1	FALSE	300.249	237.183	1.2659	0.209366	-46.981	0.684954	-204.766	0.393766	81	0.701993
5-Methylthioadenosine	41	40	0	-191.133	195.911	-387.043	-1.19462	0.239347	0.429	614	0.0522269	-0.268781	-0.720179	-0.0438472	0.787084	0.276557	FALSE	-456.814	357.754	-1.27689	0.205477	190.236	0.27768	-67.8304	0.8511	81	0.701993
Allantoin	16	21	54.321	-16.9535	12.917	-29.8705	-0.689872	0.494902	0.386	151.5	0.623628	-0.216739	-0.750336	0.487312	0.860236	0.936364	TRUE	-66.872	53.2973	-1.2547	0.218402	24.9085	0.32141	64.8464	0.233833	37	0.704656
N-carbamoyl-L-aspartate	41	40	0	-23.8913	24.4886	-48.3799	-0.597031	0.552247	0.27	784.5	0.740913	-0.132936	-0.593697	0.307491	0.899374	0.963781	FALSE	-111.707	89.2125	-1.25215	0.214306	21.567	0.62058	170.515	0.0613505	81	0.704656
Suberic Acid	41	40	0	104.665	-107.281	211.946	0.55945	0.578577	0.265	716.5	0.33053	0.122993	-0.540381	0.375718	0.910591	0.730872	FALSE	489.955	426.158	1.1497	0.253825	-208.354	0.317948	-573.972	0.184852	81	0.717756
Mevalonic acid	28	28	30.8642	-13.0102	13.0102	-26.0204	-0.858786	0.394255	0.367	361.5	0.622969	-0.22952	-0.783512	0.303388	0.860236	0.936364	TRUE	-42.006	35.3291	-1.18899	0.239844	-6.53954	0.710076	54.9768	0.129586	56	0.717756
PI(36:2)	27	39	18.5185	-57.8644	40.0599	-97.9243	-2.25389	0.0277293	2.109	331	0.0109797	-0.543075	-1.02866	-0.0720444	0.261284	0.125417	FALSE	-54.1965	47.4741	-1.1416	0.25801	-52.0355	0.0256014	-71.2056	0.140873	66	0.717756
O-Phosphoethanolamine	37	35	11.1111	21.4998	-22.7283	44.2281	1.25443	0.213876	0.477	791.5	0.105927	0.295859	-0.143988	0.824354	0.761934	0.428984	FALSE	45.5681	38.6845	1.17794	0.242925	-26.5208	0.149364	27.6522	0.48031	72	0.717756
Adenine	41	40	0	-69.1032	70.8307	-139.934	-1.32006	0.190979	0.492	669	0.155109	-0.294398	-0.711615	0.170556	0.694837	0.52007	FALSE	-134	119.2	-1.12416	0.264437	-0.943601	0.987057	-17.6323	0.88356	81	0.717756
L-leucine + L-Isoleucine	41	40	0	-1520.88	1558.9	-3079.78	-1.05189	0.296167	0.374	642.5	0.0945197	-0.234238	-0.677771	0.194922	0.805729	0.404072	FALSE	-3784.57	3282.36	-1.153	0.252475	-183.805	0.908641	2548.72	0.442857	81	0.717756
3-Hydroxyisovaleryl carnitine	41	40	0	-35.0714	35.9482	-71.0196	-0.702649	0.484447	0.287	656	0.122462	-0.155666	-0.675621	0.239175	0.860236	0.445553	FALSE	-127.96	113.228	-1.13011	0.261939	24.2737	0.66062	145.82	0.204625	81	0.717756
L-Lactic acid	40	40	1.23457	257.419	-257.419	514.839	1.1885	0.238243	0.429	868.5	0.512879	0.265757	-0.196947	0.701321	0.787084	0.866169	FALSE	583.401	480.85	1.21327	0.228784	-298.314	0.212863	184.138	0.704594	80	0.717756
Leucine+isoleucine	41	40	0	-1649.85	1691.1	-3340.95	-1.08525	0.281274	0.386	654	0.117947	-0.24178	-0.663185	0.198162	0.805729	0.438453	FALSE	-3879.1	3448.96	-1.12472	0.264203	-466.061	0.781888	2446.36	0.483177	81	0.717756
S-adenosyl-L-homoCysteine	41	38	2.46914	49.7768	-53.7065	103.483	2.3389	0.0219736	2.405	1024.5	0.0162125	0.522735	0.0870804	0.998255	0.261284	0.154019	FALSE	56.5466	48.1869	1.17348	0.244315	60.155	0.0146756	59.7067	0.220222	79	0.717756
Taurine	41	40	0	391.533	-401.321	792.854	1.40769	0.163241	0.545	974.5	0.145701	0.312134	-0.133664	0.759382	0.636848	0.506451	FALSE	706.897	634.546	1.11402	0.268736	221.385	0.475351	-63.622	0.92092	81	0.718028
PI(36:1)	20	36	30.8642	-44.4434	24.6908	-69.1342	-1.86093	0.0682497	1.14	289.5	0.231277	-0.452993	-0.846142	0.0153501	0.420266	0.66045	TRUE	-48.4258	44.2253	-1.09498	0.278572	-46.0636	0.0313857	-24.8984	0.574688	56	0.732858
7-Methylguanosine	41	40	0	52.4029	-53.713	106.116	1.89309	0.0621621	1.081	1016	0.0647725	0.419516	-0.0161917	0.871815	0.408835	0.299354	FALSE	67.0945	62.6362	1.07118	0.287435	32.0189	0.296544	76.3017	0.229936	81	0.744719
Ornithine	41	40	0	-24.7341	25.3524	-50.0865	-0.548262	0.585112	0.263	781.5	0.719616	-0.122092	-0.576076	0.326856	0.910591	0.963781	FALSE	-107.754	101.779	-1.05871	0.293041	53.6868	0.281522	102.982	0.317982	81	0.747911
Pantothenic acid	41	40	0	-62.1511	63.7048	-125.856	-1.40665	0.163867	0.545	697	0.247186	-0.313794	-0.725861	0.111106	0.636848	0.66045	FALSE	-100.957	98.6068	-1.02383	0.309119	-74.7378	0.123258	34.725	0.727423	81	0.766079
a-ketoglutarate	41	40	0	49.7895	-51.0342	100.824	0.789382	0.432262	0.303	907.5	0.411159	0.175229	-0.29978	0.619494	0.860236	0.817537	FALSE	145.873	141.689	1.02953	0.306452	-108.349	0.120001	21.551	0.880296	81	0.766079
Riboflavin	41	40	0	-21.5716	22.1109	-43.6825	-0.751702	0.454555	0.296	688	0.214133	-0.166585	-0.679024	0.264766	0.860236	0.6424	FALSE	-65.6473	65.004	-1.0099	0.315708	-6.07473	0.848141	79.9621	0.225444	81	0.77123
Methionine	41	40	0	-264.371	270.981	-535.352	-1.07232	0.287135	0.381	694.5	0.237658	-0.239135	-0.631942	0.208183	0.805729	0.66045	FALSE	-555.641	560.013	-0.992194	0.324211	-100.766	0.712439	220.013	0.697412	81	0.780845
3-Hydroxydodecanoylcarnitine	38	40	3.7037	9.82499	-9.33374	19.1587	0.278798	0.781182	0.243	809.5	0.624243	0.062777	-0.329564	0.607564	0.937119	0.936364	FALSE	74.2778	78.7431	0.943294	0.3486	-36.0508	0.340473	-106.053	0.182325	78	0.797938
Propionylcarnitine	41	40	0	-154.243	158.099	-312.342	-0.782548	0.436242	0.302	734	0.419274	-0.174	-0.628752	0.24517	0.860236	0.82409	FALSE	-426.59	449.123	-0.949829	0.345171	60.7575	0.781653	274.066	0.546172	81	0.797938
Trimethylamine-N-oxide	41	40	0	15.3784	-15.7629	31.1413	0.390858	0.697055	0.247	945	0.239551	0.087174	-0.306423	0.646179	0.934582	0.66045	FALSE	83.1187	88.3901	0.940361	0.349973	-25.0394	0.561979	-128.684	0.152169	81	0.797938
2-Hydroxyglutarate	41	40	0	30.2911	-31.0484	61.3395	1.05813	0.293479	0.376	899	0.458331	0.234255	-0.206083	0.640602	0.805729	0.842799	FALSE	61.6307	65.4073	0.942261	0.349006	-17.4064	0.585859	25.7986	0.696273	81	0.797938
Threonine	41	40	0	-620.175	635.68	-1255.85	-1.12378	0.264932	0.4	673.5	0.167829	-0.250778	-0.637233	0.169814	0.805729	0.550275	FALSE	-1117.54	1253.03	-0.891875	0.375239	-341.1	0.577318	79.1439	0.950133	81	0.802072
L-Methionine	41	40	0	-325.965	334.114	-660.079	-1.00618	0.317656	0.359	711.5	0.307612	-0.224353	-0.641014	0.209258	0.819651	0.710857	FALSE	-668.007	735.916	-0.907721	0.366858	-151.251	0.67379	257.805	0.728788	81	0.802072
Homogentisic acid	41	40	0	-48.1375	49.3409	-97.4784	-0.443681	0.658501	0.252	722.5	0.359495	-0.0984341	-0.547295	0.335831	0.930878	0.758934	FALSE	-222.251	242.696	-0.915761	0.362651	-20.185	0.864674	432.233	0.0808216	81	0.802072
Uric acid	41	40	0	-423.04	433.616	-856.657	-0.490149	0.62541	0.257	718	0.337654	-0.108719	-0.563785	0.344356	0.921941	0.730872	FALSE	-1732.14	1936.2	-0.894609	0.373784	-233.031	0.805219	3173.21	0.1076	81	0.802072
Anandamide	41	40	0	36.4587	-37.3702	73.8289	1.22266	0.225899	0.442	833.5	0.902261	0.270051	-0.164459	0.681216	0.787084	1	FALSE	62.4294	68.0581	0.917296	0.361852	-13.4336	0.685998	57.2902	0.40562	81	0.802072
Serotonin	41	40	0	-36.0137	36.9141	-72.9278	-0.358909	0.720647	0.244	796	0.824322	-0.0799024	-0.519816	0.391207	0.934582	1	FALSE	-192.494	226.745	-0.848945	0.398544	79.3955	0.473758	262.542	0.253616	81	0.831109
Dodecenoylcarnitine	38	39	4.93827	11.0812	-10.7971	21.8783	0.25386	0.800329	0.243	738.5	0.983741	0.0580038	-0.411271	0.481994	0.937119	1	FALSE	81.5428	95.2	0.856542	0.394501	-51.4219	0.267668	-114.977	0.232745	77	0.831109
Pimelylcarnitine	40	39	2.46914	-25.1112	25.7551	-50.8663	-0.242643	0.808951	0.24	673.5	0.298594	-0.0544523	-0.526928	0.373656	0.937119	0.70916	FALSE	-189.559	229.943	-0.824373	0.412342	23.8392	0.833161	434.324	0.0656197	79	0.845778
Hypotaurine	41	40	0	-87.6524	89.8437	-177.496	-1.78098	0.0789233	0.908	688	0.21412	-0.394663	-0.805713	0.021571	0.465375	0.6424	FALSE	-90.4988	110.536	-0.818725	0.41547	-68.7825	0.204609	-174.111	0.121747	81	0.845778
Hydroxykynurenine	41	40	0	-30.8647	31.6363	-62.5011	-0.61013	0.543545	0.272	750.5	0.514524	-0.135723	-0.579218	0.28547	0.893713	0.866169	FALSE	-80.0519	115.192	-0.694945	0.489182	34.8404	0.535878	2.92564	0.979937	81	0.858871
Nicotinamide Riboside	23	21	45.679	20.6393	-22.6049	43.2442	0.745677	0.460029	0.373	272	0.480821	0.223513	-0.368629	0.843923	0.860236	0.856463	TRUE	51.1727	77.6029	0.659418	0.513406	-7.16535	0.852652	-10.7062	0.895967	44	0.858871
N-acetyl spermine	41	40	0	133.653	-136.995	270.648	0.736183	0.463856	0.293	887.5	0.526793	0.163231	-0.279405	0.591856	0.860236	0.866169	FALSE	295.833	414.861	0.71309	0.477946	-101.968	0.614761	75.6308	0.856766	81	0.858871
Decanoylcarnitine	41	40	0	34.2268	-35.0824	69.3092	0.256162	0.798527	0.238	819.5	1	0.0567468	-0.403949	0.457989	0.937119	1	FALSE	215.687	303.913	0.709698	0.480035	-98.332	0.507895	-319.672	0.299339	81	0.858871
N-Acetylornithine	41	40	0	74.8688	-76.7405	151.609	0.856693	0.394221	0.318	895.5	0.478644	0.190148	-0.25232	0.647873	0.860236	0.856463	FALSE	148.085	199.554	0.742079	0.460297	-34.7768	0.721097	64.7477	0.748087	81	0.858871
Citrulline	41	40	0	-196.292	201.199	-397.491	-0.359354	0.720329	0.245	817.5	0.984926	-0.08004	-0.482804	0.388208	0.934582	1	FALSE	-958.92	1235.81	-0.775943	0.440159	291.241	0.629383	1358.05	0.278392	81	0.858871
Betaine	39	39	3.7037	-28.808	28.808	-57.616	-0.672884	0.503062	0.286	695	0.515965	-0.152378	-0.618573	0.304096	0.860236	0.866169	FALSE	-66.5671	95.8462	-0.69452	0.489531	18.1355	0.700799	-0.855994	0.99294	78	0.858871
L-Acetylcarnitine	41	40	0	-255.221	261.601	-516.822	-0.49731	0.620418	0.257	702.5	0.269047	-0.110186	-0.604361	0.278656	0.921941	0.697075	FALSE	-793.069	1171.74	-0.676831	0.500541	446.603	0.435658	202.372	0.864227	81	0.858871
Isovalerylcarnitine	41	40	0	-143.432	147.018	-290.45	-0.902808	0.369466	0.329	688	0.214128	-0.201044	-0.628906	0.251739	0.860236	0.6424	FALSE	-273.461	362.28	-0.754832	0.452652	-30.4023	0.863467	-7.93656	0.982694	81	0.858871
Agmatine	34	27	24.6914	5.7359	-7.22299	12.9589	0.162646	0.871356	0.265	426	0.63698	0.0404969	-0.494961	0.501895	0.937119	0.938996	TRUE	67.0564	95.7891	0.700041	0.486749	-57.877	0.250609	-58.7929	0.530046	61	0.858871
Dimethyl-L-arginine	41	40	0	47.6696	-48.8613	96.5309	1.0401	0.301559	0.37	943.5	0.245257	0.231569	-0.198959	0.678824	0.805729	0.66045	FALSE	79.8337	104.219	0.766021	0.446006	34.2386	0.501414	1.10478	0.991625	81	0.858871
Glycerophosphocholine	41	40	0	873.451	-895.287	1768.74	1.10017	0.274854	0.391	895.5	0.478642	0.243585	-0.195035	0.663523	0.805729	0.856463	FALSE	1187.08	1811.97	0.65513	0.514337	775.208	0.381807	679.774	0.710413	81	0.858871
Quinolinic Acid	33	25	28.3951	7.37278	-9.73208	17.1049	0.572733	0.569147	0.308	419	0.924935	0.143992	-0.45126	0.587524	0.910591	1	TRUE	23.078	35.3052	0.653672	0.516097	-11.8906	0.505551	-5.3703	0.877826	58	0.858871
Xanthosine	41	40	0	59.7487	-61.2425	120.991	1.33706	0.185858	0.502	933	0.287895	0.295352	-0.143184	0.672438	0.694837	0.70916	FALSE	66.1766	101.738	0.65046	0.517331	37.6877	0.448613	118.381	0.251302	81	0.858871
2-Keto-L-gluconate	30	40	13.5802	41.4724	-31.1043	72.5767	0.773017	0.444456	0.32	591.5	0.924356	0.206699	-0.344575	0.544565	0.860236	1	FALSE	70.1261	98.3667	0.712905	0.478417	21.2733	0.651375	-18.8588	0.847171	70	0.858871
Eicosapentaenoic acid	40	39	2.46914	-23.7898	24.3998	-48.1897	-0.517572	0.606336	0.262	784	0.972621	-0.116813	-0.552614	0.323857	0.921941	1	FALSE	-74.2338	105.222	-0.705497	0.482686	-2.48096	0.962244	85.7431	0.413546	79	0.858871
glucose-1-phosphate	41	40	0	34.6431	-35.5091	70.1522	0.745669	0.458131	0.294	855.5	0.740925	0.165351	-0.259115	0.603513	0.860236	0.963781	FALSE	70.8817	106.287	0.66689	0.506836	14.2383	0.783728	-24.2148	0.821553	81	0.858871
N-acetyl-glutamine	41	40	0	28.1087	-28.8114	56.92	0.270224	0.787705	0.239	812	0.943516	0.0599389	-0.369343	0.513436	0.937119	1	FALSE	-153.888	231.866	-0.663695	0.508868	172.955	0.12922	412.246	0.081327	81	0.858871
PI(36:4)	32	40	11.1111	-1.32411	1.05929	-2.38341	-0.0275478	0.978162	0.244	460.5	0.0425049	-0.00707829	-0.798776	0.388894	0.978162	0.249138	FALSE	67.3228	86.5514	0.777837	0.439363	-93.4496	0.0279106	-67.7437	0.437107	72	0.858871
Orotidine monophosphate	24	23	41.9753	-4.84256	5.0531	-9.89566	-0.324533	0.747051	0.303	260	0.741483	-0.0948001	-0.711003	0.49582	0.937119	0.963781	TRUE	-19.6169	31.8219	-0.61646	0.540841	21.0132	0.178826	-10.8556	0.74253	47	0.864679
3-Aminoisobutyric acid	41	40	0	-3.66849	3.7602	-7.42868	-0.0922789	0.92671	0.232	787.5	0.762432	-0.0205018	-0.464645	0.407336	0.951272	0.965747	FALSE	-55.3529	90.0166	-0.614919	0.540421	43.7344	0.32097	86.9361	0.340364	81	0.864679
Sarcosine	41	40	0	-490.294	502.552	-992.846	-0.823396	0.41278	0.31	695.5	0.241448	-0.183134	-0.619788	0.249574	0.860236	0.66045	FALSE	-823.078	1357.59	-0.606278	0.546113	-320.188	0.629119	-54.1319	0.968507	81	0.864679
Myristoylcarnitine	41	40	0	28.2634	-28.97	57.2335	0.479434	0.632988	0.255	851.5	0.769642	0.106304	-0.362586	0.551121	0.925136	0.967711	FALSE	81.7007	133.712	0.611019	0.542986	31.6762	0.627597	-127.331	0.347116	81	0.864679
Alanine	41	40	0	-473.263	485.095	-958.358	-0.80828	0.421365	0.307	709	0.296554	-0.179708	-0.619737	0.248605	0.860236	0.70916	FALSE	-818.284	1336.05	-0.612466	0.542034	-264.239	0.685409	-44.5817	0.973643	81	0.864679
2-Arachidonylglycerol	26	26	35.8025	21.6719	-21.6719	43.3439	0.368861	0.713789	0.294	285	0.336636	0.102304	-0.749762	0.476183	0.934582	0.730872	TRUE	76.6168	131.566	0.582343	0.563061	-34.573	0.586951	-71.3189	0.617292	52	0.883334
Hexose Disaccharide Pool	34	37	12.3457	-28.153	25.8703	-54.0233	-0.173219	0.862989	0.248	534.5	0.279265	-0.0408823	-0.443808	0.407407	0.937119	0.70916	FALSE	176.802	358.152	0.493649	0.623168	-154.56	0.374895	-462.235	0.195602	71	0.893166
Uridine	41	40	0	11.8439	-12.1399	23.9838	0.611627	0.542564	0.272	881	0.567651	0.135689	-0.2847	0.5779	0.893713	0.898781	FALSE	20.4419	44.0837	0.463707	0.644166	-10.463	0.626952	27.46	0.537884	81	0.893166
11,12-DiHETrE	41	40	0	-13.7379	14.0813	-27.8192	-0.154587	0.877544	0.234	740.5	0.455507	-0.0343107	-0.448346	0.422134	0.937875	0.842799	FALSE	-108.749	200.78	-0.541631	0.589636	-5.71907	0.953452	269.029	0.187098	81	0.893166
L-Glutarylcarnitine	41	40	0	45.0672	-46.1939	91.261	0.68275	0.496876	0.283	853.5	0.755237	0.151237	-0.29131	0.56823	0.860236	0.963781	FALSE	74.5099	150.55	0.494918	0.622067	-29.644	0.686721	99.3975	0.513867	81	0.893166
Cytidine monophosphate	36	28	20.9877	21.0137	-27.0176	48.0312	1.65521	0.103479	0.81	668	0.0269065	0.420952	-0.0770316	1.05734	0.505567	0.209137	TRUE	14.3851	30.7199	0.468266	0.641291	42.7001	0.0084247	21.2437	0.467312	64	0.893166
Gluconolactone	40	40	1.23457	-6.3543	6.3543	-12.7086	-0.363057	0.717544	0.246	785	0.88903	-0.0811821	-0.514354	0.343794	0.934582	1	FALSE	-17.627	39.6779	-0.444253	0.658122	-7.58089	0.692835	26.615	0.50618	80	0.893166
Normetanephrine	41	40	0	-72.9142	74.737	-147.651	-0.687711	0.493796	0.284	728.5	0.389957	-0.153307	-0.598434	0.291248	0.860236	0.793862	FALSE	-126.576	238.488	-0.530746	0.597122	93.0867	0.424734	-210.745	0.382768	81	0.893166
beta-Alanine	41	40	0	54.3701	-55.7293	110.099	0.529494	0.59795	0.261	840	0.853841	0.117575	-0.324784	0.556861	0.921166	1	FALSE	108.819	234.863	0.463332	0.644434	-2.44593	0.982973	7.87249	0.973523	81	0.893166
1-Methylhistidine	41	40	0	-8.28508	8.49221	-16.7773	-0.115566	0.908302	0.232	769	0.633287	-0.025608	-0.488666	0.392501	0.951272	0.938996	FALSE	-73.0125	163.383	-0.446879	0.656217	74.0175	0.354542	67.1489	0.684206	81	0.893166
N-acetyl-glutamate	41	40	0	63.6336	-65.2245	128.858	0.115696	0.908187	0.232	817	0.981159	0.0257038	-0.408841	0.457184	0.951272	1	FALSE	603.459	1243.41	0.485327	0.628822	-792.966	0.193691	-308.224	0.806146	81	0.893166
L-Proline	41	40	0	-866.486	888.148	-1754.63	-0.76262	0.447964	0.298	709	0.296565	-0.169354	-0.637862	0.228714	0.860236	0.70916	FALSE	-1436.05	2590.71	-0.554307	0.580975	278.171	0.825865	-1451.73	0.579378	81	0.893166
Glycine	41	40	0	36.8586	-37.7801	74.6388	0.376916	0.707258	0.246	841.5	0.842747	0.0836304	-0.35091	0.53063	0.934582	1	FALSE	112.357	223.622	0.50244	0.616792	-37.2422	0.732977	-64.0875	0.776644	81	0.893166
Glutamic acid	41	40	0	128.659	-131.875	260.534	1.0959	0.27675	0.389	911.5	0.389967	0.242571	-0.190391	0.635448	0.805729	0.793862	FALSE	145.059	267.699	0.541874	0.58947	81.9734	0.530835	245.425	0.36528	81	0.893166
BMP(18:1/16:0)	17	28	44.4444	-17.5965	10.6836	-28.28	-0.695593	0.491923	0.367	198	0.355085	-0.220616	-0.868908	0.409326	0.860236	0.758934	TRUE	-18.5716	41.2449	-0.450276	0.654884	-21.7281	0.304164	8.32594	0.851993	45	0.893166
Adipoylcarnitine	40	40	1.23457	11.5546	-11.5546	23.1092	0.192825	0.847597	0.236	636.5	0.116759	0.043117	-0.731245	0.335467	0.937119	0.438453	FALSE	70.8663	134.35	0.527476	0.5994	-31.9799	0.625245	-106.295	0.434242	80	0.893166
Histidine	41	40	0	-25.0888	25.716	-50.8049	-0.492057	0.624078	0.257	711.5	0.307622	-0.109104	-0.575903	0.306242	0.921941	0.710857	FALSE	-59.3905	115.462	-0.514373	0.608465	-43.5766	0.440152	94.5394	0.418509	81	0.893166
Butyrylcarnitine	41	39	1.23457	-240.683	253.025	-493.708	-1.07285	0.287323	0.383	605	0.0618467	-0.242451	-0.6247	0.225637	0.805729	0.293772	FALSE	-258.414	502.761	-0.51399	0.60875	22.1858	0.927786	-807.152	0.114722	80	0.893166
Methylcysteine	41	40	0	119.231	-122.212	241.443	0.547268	0.58576	0.263	837	0.876134	0.121403	-0.303569	0.558233	0.910591	1	FALSE	212.791	498.61	0.426767	0.67074	-11.7801	0.961384	110.232	0.82675	81	0.899839
3-Hydroxyhexanoylcarnitine	41	40	0	39.7853	-40.7799	80.5652	0.990198	0.325202	0.354	903	0.435765	0.219489	-0.223361	0.630592	0.819651	0.837257	FALSE	38.4785	90.9922	0.422877	0.673564	8.54744	0.847364	122.209	0.186073	81	0.899839
9-Decenoylcarnitine	41	40	0	-155.395	159.28	-314.675	-0.772439	0.442201	0.3	717.5	0.335277	-0.171903	-0.598509	0.275478	0.860236	0.730872	FALSE	-181.247	452.52	-0.400528	0.689877	-309.432	0.163781	46.2033	0.919475	81	0.914488
Dephospho-CoA	41	40	0	6.6727	-6.83952	13.5122	0.444483	0.657941	0.252	858	0.723135	0.0989529	-0.320814	0.544566	0.930878	0.963781	FALSE	12.899	34.2455	0.376662	0.707461	1.8422	0.912221	-0.857534	0.980219	81	0.921343
Homocysteine	41	40	0	-19.9976	20.4976	-40.4952	-0.496174	0.621158	0.257	764	0.600085	-0.110344	-0.577903	0.33426	0.921941	0.936364	FALSE	-33.5621	91.1029	-0.368398	0.713588	-43.3397	0.331095	44.2723	0.630646	81	0.921343
DL-2-Aminooctanoic acid	41	40	0	17.7591	-18.203	35.9621	0.202295	0.840231	0.235	774	0.667327	0.0448221	-0.411537	0.455145	0.937119	0.958933	FALSE	75.5865	200.971	0.376106	0.707872	-28.8983	0.768302	-83.0339	0.68263	81	0.921343
Oxaloacetic acid	41	40	0	20.4669	-20.9786	41.4455	0.350558	0.726897	0.244	782	0.72315	0.0776727	-0.384948	0.488594	0.934582	0.963781	FALSE	48.5893	133.361	0.364343	0.7166	-37.8257	0.561497	35.1255	0.794294	81	0.921343
PI(38:5)	24	38	23.4568	-23.6104	14.9119	-38.5223	-0.838967	0.405651	0.355	383.5	0.298075	-0.220258	-0.79777	0.289112	0.860236	0.70916	TRUE	-15.6958	47.014	-0.333854	0.739693	-49.9323	0.0273426	16.9803	0.73186	62	0.943937
Cinnamoylglycine	31	37	16.0494	-9.88234	8.27979	-18.1621	-0.195291	0.845773	0.254	572	0.990175	-0.0472652	-0.533893	0.411726	0.937119	1	FALSE	27.9808	102.559	0.272826	0.785865	-94.8879	0.0687823	28.2773	0.779671	68	0.966784
Orotic acid	40	40	1.23457	-10.7891	10.7891	-21.5783	-0.163996	0.870159	0.235	754.5	0.665002	-0.0366706	-0.52178	0.375652	0.937119	0.958933	FALSE	-41.6868	148.069	-0.281537	0.779064	22.2273	0.757951	30.264	0.839612	80	0.966784
Acetylcholine	41	40	0	137.975	-141.425	279.4	1.05066	0.296889	0.373	883	0.554907	0.232579	-0.199357	0.635315	0.805729	0.88682	FALSE	-82.2922	282.02	-0.291796	0.771228	147.663	0.285063	936.289	0.00147561	81	0.966784
Creatinine	41	40	0	76.2783	-78.1853	154.464	0.424882	0.672144	0.25	806	0.898524	0.0941155	-0.377336	0.479974	0.934444	1	FALSE	-112.565	402.963	-0.279344	0.78073	77.1499	0.694939	740.184	0.0719241	81	0.966784
7-methylguanine	41	40	0	21.7113	-22.2541	43.9654	0.432662	0.66644	0.251	863	0.688066	0.096144	-0.337709	0.539068	0.934108	0.963781	FALSE	32.8163	114.61	0.28633	0.775394	-0.537053	0.992338	36.6772	0.75142	81	0.966784
Phenylpropiolic acid	41	40	0	23.3164	-23.8993	47.2156	0.247739	0.804981	0.237	840	0.853848	0.0549999	-0.357443	0.48522	0.937119	1	FALSE	54.9754	212.138	0.259149	0.796212	-112.887	0.277333	148.434	0.489101	81	0.972516
Guanidoacetic acid	29	29	28.3951	2.38566	-2.38566	4.77133	0.19293	0.847712	0.27	432.5	0.858016	0.0506658	-0.481719	0.59974	0.937119	1	TRUE	-6.69146	29.0243	-0.230547	0.818538	0.949358	0.947721	35.0185	0.230118	58	0.97947
Itaconic acid	41	40	0	1.39258	-1.4274	2.81998	0.0489976	0.961047	0.231	793	0.80233	0.0108681	-0.424838	0.428243	0.9667	0.994192	FALSE	-15.6036	64.7042	-0.241152	0.810078	0.137493	0.996525	59.0331	0.367594	81	0.97947
L-Serine	41	40	0	62.8358	-64.4067	127.243	0.210842	0.833553	0.236	853.5	0.755243	0.0468354	-0.391818	0.465186	0.937119	0.963781	FALSE	155.348	676.897	0.2295	0.819089	-248.6	0.452496	291.455	0.670043	81	0.97947
PI(40:5)	23	29	35.8025	-11.0364	8.753	-19.7894	-0.567979	0.572801	0.32	287.5	0.40182	-0.159543	-0.746148	0.362147	0.910591	0.808368	TRUE	-8.12657	37.3108	-0.217808	0.828502	-13.5172	0.448112	-25.3387	0.505805	52	0.983846
a-ketoglutarate.1	41	40	0	-5.89263	6.03995	-11.9326	-0.138033	0.890566	0.233	820.5	1	-0.0306697	-0.502861	0.436868	0.94588	1	FALSE	-19.4822	96.8527	-0.201153	0.84111	-27.9495	0.554709	67.2058	0.492701	81	0.985135
L-Histidine	41	40	0	-132.078	135.38	-267.459	-0.659642	0.51142	0.279	751.5	0.520633	-0.146729	-0.583413	0.301044	0.865869	0.866169	FALSE	-91.6981	453.35	-0.202268	0.840241	-251.868	0.256889	-178.339	0.69704	81	0.985135
Pipecolic acid	41	40	0	251.106	-257.384	508.49	0.225384	0.822265	0.236	831	0.920989	0.0500336	-0.397411	0.488778	0.937119	1	FALSE	240.176	2542.7	0.0944571	0.924991	-261.264	0.833246	1264.1	0.622811	81	0.98794
L-Glutamine	41	40	0	299.978	-307.477	607.455	0.212289	0.832432	0.236	817	0.981158	0.047112	-0.384599	0.488225	0.937119	1	FALSE	466.602	3224.68	0.144697	0.885328	-586.98	0.709248	1354.5	0.677646	81	0.98794
Histamine	32	31	22.2222	15.8362	-16.347	32.1832	0.652744	0.516699	0.308	490	0.939724	0.163453	-0.344153	0.641247	0.866231	1	TRUE	-8.23154	59.5683	-0.138187	0.890564	37.0592	0.209164	59.0305	0.338222	63	0.98794
Lysine	41	40	0	305.982	-313.632	619.614	0.19925	0.842581	0.235	804	0.883586	0.044229	-0.396264	0.491264	0.937119	1	FALSE	429.467	3502.52	0.122617	0.90273	-644.82	0.706091	1601.85	0.650878	81	0.98794
Arginine	41	40	0	7.96641	-8.16557	16.132	0.109093	0.913416	0.232	883	0.554911	0.0242969	-0.423813	0.488381	0.951272	0.88682	FALSE	-27.3444	166.118	-0.164608	0.869684	25.9938	0.748537	99.8815	0.552064	81	0.98794
Aspartylglycosamine	39	38	4.93827	8.47329	-8.69627	17.1696	0.350975	0.726602	0.249	746.5	0.959367	0.0798628	-0.365545	0.487087	0.934582	1	FALSE	0.823817	54.3153	0.0151673	0.98794	-0.817673	0.975495	55.4982	0.316152	77	0.98794
Ceramide(d18:1/12:0)	39	34	9.87654	-4.61776	5.29684	-9.9146	-0.317615	0.751716	0.253	628.5	0.706914	-0.0742449	-0.536508	0.366933	0.937119	0.963781	FALSE	0.757566	34.742	0.0218055	0.982666	-18.6371	0.273844	-12.9145	0.719684	73	0.98794
24,25-Dihydrolanosterol	41	40	0	11.8363	-12.1322	23.9685	0.0753684	0.940146	0.232	912.5	0.38479	0.0168336	-0.377093	0.520484	0.951272	0.793862	FALSE	-25.844	356.74	-0.0724449	0.942436	70.0106	0.687704	52.6497	0.883823	81	0.98794
Octanoylcarnitine	41	40	0	-106.165	108.819	-214.984	-0.712541	0.478541	0.288	741	0.458364	-0.159074	-0.514747	0.349056	0.860236	0.842799	FALSE	-50.3166	333.008	-0.151097	0.880294	-269.055	0.10075	-116.269	0.729659	81	0.98794
1-Methyladenosine	41	40	0	16.7678	-17.187	33.9548	0.443399	0.658692	0.252	826	0.958562	0.0984511	-0.341889	0.583871	0.930878	1	FALSE	-1.66838	86.0053	-0.0193986	0.984573	31.8984	0.448064	65.5593	0.451224	81	0.98794
L-Lysine	41	40	0	317.159	-325.088	642.248	0.209137	0.834886	0.236	814	0.958563	0.0464019	-0.400456	0.463228	0.937119	1	FALSE	581.701	3461.2	0.168064	0.866974	-723.869	0.668405	1306.51	0.708707	81	0.98794
L-Glutamic acid	41	40	0	33.4964	-34.3338	67.8303	0.170621	0.864976	0.234	777	0.688071	0.03781	-0.425744	0.463629	0.937119	0.963781	FALSE	36.8782	448.171	0.0822859	0.934633	-88.4857	0.685919	235.44	0.603265	81	0.98794
Tiglylcarnitine	41	40	0	44.3931	-45.503	89.8961	0.306365	0.760139	0.241	831	0.920989	0.0679923	-0.360012	0.485066	0.937119	1	FALSE	14.7285	330.965	0.0445016	0.96462	39.9397	0.804709	180.371	0.589808	81	0.98794
Cystine	41	40	0	15.9035	-16.3011	32.2046	0.0866589	0.931162	0.232	810.5	0.932247	0.0192607	-0.410266	0.47498	0.951272	1	FALSE	25.756	419.365	0.0614166	0.951187	6.31204	0.975393	11.0417	0.979201	81	0.98794
Ketoleucine	41	40	0	5.80295	-5.94802	11.751	0.176093	0.860684	0.234	755.5	0.545435	0.0390398	-0.400075	0.489329	0.937119	0.88682	FALSE	-10.9695	75.2654	-0.145744	0.884504	19.3035	0.599495	43.4129	0.568326	81	0.98794
Citraconic acid	41	40	0	7.07358	-7.25042	14.324	0.198848	0.842897	0.235	794.5	0.813303	0.0441275	-0.416817	0.496559	0.937119	1	FALSE	2.39619	81.3562	0.029453	0.976579	8.71145	0.826335	24.9759	0.761216	81	0.98794
Glyceric acid	41	39	1.23457	-4.5937	4.82927	-9.42297	-0.362098	0.718258	0.246	759	0.700214	-0.0808903	-0.544574	0.35218	0.934582	0.963781	FALSE	-3.19666	29.0658	-0.10998	0.912715	-20.476	0.14654	10.0874	0.73194	80	0.98794
Malonic acid	38	35	9.87654	-55.852	60.6393	-116.491	-0.38594	0.700815	0.258	651.5	0.885853	-0.0913368	-0.518957	0.389254	0.934582	1	FALSE	-6.84337	327.838	-0.0208743	0.983406	-77.9422	0.630117	-275.913	0.403068	73	0.98794
Aspartic acid	41	40	0	34.4356	-35.2964	69.732	0.324275	0.746698	0.242	786	0.751653	0.0717227	-0.390491	0.460404	0.937119	0.963781	FALSE	-4.63436	242.821	-0.0190855	0.984822	26.9176	0.820317	197.795	0.420902	81	0.98794
Indole-3-carboxylic acid	41	40	0	11.8073	-12.1025	23.9098	0.312157	0.75581	0.241	783.5	0.733793	0.0691068	-0.394096	0.501215	0.937119	0.963781	FALSE	-8.68892	86.1806	-0.100822	0.919954	9.95654	0.812875	89.5347	0.30528	81	0.98794
3-methylphenylacetic acid	41	38	2.46914	-8.36144	9.02155	-17.383	-0.0916749	0.927195	0.235	728	0.620222	-0.0205986	-0.496355	0.433713	0.951272	0.936364	FALSE	-37.1278	212.058	-0.175083	0.861486	-17.1561	0.869291	92.0428	0.668872	79	0.98794
Xanthurenic acid	37	40	4.93827	-33.3169	30.8181	-64.135	-0.89309	0.374683	0.334	662	0.429414	-0.203696	-0.618669	0.261537	0.860236	0.83443	FALSE	6.08305	76.6983	0.0793113	0.937002	-113.942	0.00300923	-63.4539	0.413715	77	0.98794
Pseudouridine	41	40	0	12.6015	-12.9165	25.518	0.678508	0.499469	0.282	869.5	0.643443	0.15049	-0.287088	0.5764	0.860236	0.940417	FALSE	5.12892	41.7837	0.122749	0.902625	-0.654541	0.97439	66.5701	0.117595	81	0.98794
Ascorbic acid	41	40	0	6.85518	-7.02656	13.8817	0.07688	0.938917	0.232	775	0.674217	0.017051	-0.425493	0.440129	0.951272	0.960759	FALSE	7.57016	204.013	0.0371062	0.970496	-19.3371	0.846004	49.9967	0.808308	81	0.98794
p-Aminohippuric acid	40	40	1.23457	-27.1123	27.1123	-54.2245	-0.460787	0.646234	0.255	803.5	0.97697	-0.103035	-0.537017	0.345991	0.930878	1	FALSE	-20.0668	132.629	-0.1513	0.88014	-77.8817	0.226738	12.8528	0.923376	80	0.98794

## Sheet: Subgroup_Stats
contrast	metabolite	n_a	n_b	mean_a	mean_b	welch_t	welch_p	cohen_d	beta_adj	p_adj	fdr_welch	fdr_adj
AP_typical_vs_atypical	3-Hydroxyhexanoylcarnitine	27	14	142.732	-158.755	2.95392	0.00530336	0.791749	525.059	0.00106754	0.906874	0.105799
AP_typical_vs_atypical	Ketoleucine	27	14	77.7292	-132.912	2.59307	0.0136007	0.665319	420.782	0.00123742	0.997718	0.105799
AP_typical_vs_atypical	L-Glutarylcarnitine	27	14	189.762	-233.987	2.47012	0.0180986	0.648099	786.233	0.00418695	0.997718	0.238656
AP_typical_vs_atypical	Citraconic acid	27	14	64.0872	-102.881	1.66786	0.104324	0.494741	380.427	0.006577	0.997718	0.281167
AP_typical_vs_atypical	Itaconic acid	27	14	54.7258	-101.464	2.09997	0.0422577	0.574718	274.172	0.0181558	0.997718	0.620927
AP_typical_vs_atypical	S-adenosyl-L-homoCysteine	27	14	62.7303	24.795	0.54163	0.592337	0.174359	178.451	0.0264338	0.997718	0.645739
AP_typical_vs_atypical	Azelaic acid	24	14	1481.49	-628.996	1.55577	0.132982	0.399516	4841.58	0.0260848	0.997718	0.645739
AP_typical_vs_atypical	Homocysteine	27	14	-81.1027	97.8479	-1.40107	0.176229	-0.50987	-301.647	0.0430357	0.997718	0.682298
AP_typical_vs_atypical	L-Phenylalanine	27	14	-1.20965	-1337.88	1.76273	0.0857828	0.479874	2381.32	0.0416194	0.997718	0.682298
AP_typical_vs_atypical	2-Octenoylcarnitine	27	14	-360.718	4.15577	-1.70918	0.10784	-0.718319	-459.54	0.0451478	0.997718	0.682298
AP_typical_vs_atypical	7-Methylguanosine	27	14	84.5468	-9.58878	1.17893	0.24586	0.336373	237.139	0.0395804	0.997718	0.682298
AP_typical_vs_atypical	Pyroglutamic acid	27	12	-6.63758	47.981	-1.25015	0.226023	-0.449624	-103.917	0.0478806	0.997718	0.682298
AP_typical_vs_atypical	Histamine	21	11	56.3649	-61.5368	1.83793	0.0778824	0.516208	231.084	0.0566356	0.997718	0.714374
AP_typical_vs_atypical	L-Proline	27	14	-459.965	-1650.49	0.366601	0.716214	0.11033	7368.57	0.0900229	0.997718	0.714374
AP_typical_vs_atypical	Betaine	26	13	16.7519	-119.928	1.34139	0.188176	0.383386	289.041	0.0597683	0.997718	0.714374
AP_typical_vs_atypical	BMP(18:1/16:0)	9	8	28.3256	-69.2588	1.58117	0.142727	0.734398	173.877	0.0671633	0.997718	0.714374
AP_typical_vs_atypical	Vitamin K2	19	10	51.8339	-38.371	1.06353	0.296963	0.345239	195.955	0.0998956	0.997718	0.714374
AP_typical_vs_atypical	Riboflavin	27	14	-69.1488	70.1844	-1.2856	0.214409	-0.487575	-234.474	0.0641735	0.997718	0.714374
AP_typical_vs_atypical	Allantoin	11	5	15.2304	-87.7581	2.54884	0.0235231	1.08116	110.677	0.0910043	0.997718	0.714374
AP_typical_vs_atypical	Ascorbic acid	27	14	102.741	-178.068	1.0904	0.282864	0.319985	645.537	0.0786967	0.997718	0.714374
AP_typical_vs_atypical	glucose-1-phosphate	27	14	76.1356	-45.3782	0.909391	0.369095	0.263147	329.166	0.0895892	0.997718	0.714374
AP_typical_vs_atypical	PI(38:4)	26	14	-356.882	-0.463826	-1.38756	0.179817	-0.502135	-489.562	0.0943362	0.997718	0.714374
AP_typical_vs_atypical	PI(38:3)	22	13	-155.003	-0.435486	-1.3133	0.206323	-0.520949	-212.462	0.100263	0.997718	0.714374
AP_typical_vs_atypical	PI(40:5)	12	11	-49.2043	30.6014	-1.50558	0.153267	-0.645106	-151.804	0.0741927	0.997718	0.714374
AP_typical_vs_atypical	Purine	27	14	-56.1182	-147.112	1.08308	0.286711	0.329888	187.628	0.109323	0.997718	0.747766
AP_typical_vs_atypical	Tiglylcarnitine	27	14	154.114	-167.212	0.741745	0.463753	0.229292	880.709	0.121018	0.997718	0.790707
AP_typical_vs_atypical	Adipoylcarnitine	26	14	83.7219	-122.47	1.13008	0.267423	0.283143	477.526	0.126282	0.997718	0.790707
AP_typical_vs_atypical	Glyceric acid	27	14	-15.2924	16.0395	-0.696796	0.494372	-0.261424	-76.0054	0.129473	0.997718	0.790707
AP_typical_vs_atypical	Dimethylglycine	27	14	-594.969	88.1821	-1.01851	0.325161	-0.439373	-883.046	0.145096	0.997718	0.797461
AP_typical_vs_atypical	Pipecolic acid	27	14	1234.26	-1644.98	0.861861	0.395571	0.270579	5608.58	0.207071	0.997718	0.797461
AP_typical_vs_atypical	DL-2-Aminooctanoic acid	27	14	17.2034	18.8308	-0.00549215	0.995659	-0.0018	478.986	0.180254	0.997718	0.797461
AP_typical_vs_atypical	7-methylguanine	27	14	53.5119	-39.6183	0.638703	0.527886	0.201205	265.293	0.162633	0.997718	0.797461
AP_typical_vs_atypical	N-acetyl-glutamine	27	14	107.397	-124.805	0.776445	0.442547	0.226348	525.771	0.18961	0.997718	0.797461
AP_typical_vs_atypical	Propionylcarnitine	27	14	-138.368	-184.86	0.0757088	0.940295	0.0261005	986.118	0.149954	0.997718	0.797461
AP_typical_vs_atypical	Malonylcarnitine	27	14	-69.5109	40.2387	-0.696134	0.494691	-0.259994	-219.962	0.212397	0.997718	0.797461
AP_typical_vs_atypical	5-Methylthioadenosine	27	14	-189.017	-195.212	0.108731	0.914154	0.034436	89.1344	0.205655	0.997718	0.797461
AP_typical_vs_atypical	Suberylcarnitine	25	14	195.246	-73.3113	0.865835	0.394987	0.215761	719.843	0.174732	0.997718	0.797461
AP_typical_vs_atypical	Nicotinamide Riboside	15	8	45.2396	-25.4862	0.847289	0.407753	0.339183	181.251	0.158168	0.997718	0.797461
AP_typical_vs_atypical	Octanoylcarnitine	27	14	-211.343	96.6788	-0.903914	0.373217	-0.283862	-526.112	0.213774	0.997718	0.797461
AP_typical_vs_atypical	Oleoylcarnitine	15	11	394.73	-129.772	1.0007	0.333944	0.338325	1305.84	0.15184	0.997718	0.797461
AP_typical_vs_atypical	Aspartic acid	27	14	97.8807	-87.923	0.557357	0.580681	0.161375	615.082	0.189412	0.997718	0.797461
AP_typical_vs_atypical	Xanthine	27	14	53.1748	215.241	-0.905452	0.379179	-0.376858	-234.231	0.206401	0.997718	0.797461
AP_typical_vs_atypical	Suberic Acid	27	14	307.743	-286.987	1.06434	0.296589	0.252726	1434.94	0.143912	0.997718	0.797461
AP_typical_vs_atypical	Eicosapentaenoic acid	27	13	35.0038	-145.9	2.08552	0.0452078	0.506312	211.819	0.182975	0.997718	0.797461
AP_typical_vs_atypical	Hexose Disaccharide Pool	22	12	-290.999	453.73	-1.28758	0.224315	-0.633839	-753.005	0.166533	0.997718	0.797461
AP_typical_vs_atypical	PI(36:4)	19	13	-68.7634	97.2411	-0.898027	0.382118	-0.361666	-290.019	0.214522	0.997718	0.797461
AP_typical_vs_atypical	beta-Alanine	27	14	120.517	-73.1996	0.620847	0.539618	0.198687	489.177	0.224233	0.997718	0.80318
AP_typical_vs_atypical	L-Lysine	27	14	1556.36	-2072.72	0.799418	0.429939	0.245292	7295.07	0.239545	0.997718	0.80318
AP_typical_vs_atypical	3-Hydroxy-cis-5-tetradecenoylcarnitine	24	12	58.0805	-26.2581	0.904729	0.37471	0.225864	203.525	0.22749	0.997718	0.80318
AP_typical_vs_atypical	Glycine	27	14	94.1834	-73.6963	0.575382	0.568998	0.175578	473.264	0.23614	0.997718	0.80318
AP_typical_vs_atypical	Xanthurenic acid	23	14	-7.1507	-76.3041	0.635371	0.530628	0.218027	-156.465	0.232795	0.997718	0.80318
AP_typical_vs_atypical	L-Palmitoylcarnitine	14	9	278.953	-92.2595	1.00055	0.335265	0.339986	721.136	0.245024	0.997718	0.805751
AP_typical_vs_atypical	Methylguanidine	26	14	-168.036	-112.595	-0.243397	0.809516	-0.0800745	-332.002	0.279204	0.997718	0.899281
AP_typical_vs_atypical	Creatinine	27	14	114.968	1.66346	0.164599	0.870937	0.060785	733.984	0.330826	0.997718	0.899281
AP_typical_vs_atypical	Ornithine	27	14	6.10574	-84.2108	0.685879	0.499716	0.238824	128.62	0.400696	0.997718	0.899281
AP_typical_vs_atypical	Methylcysteine	27	14	237.307	-108.486	0.499477	0.621343	0.161037	794.51	0.3746	0.997718	0.899281
AP_typical_vs_atypical	Acetylcholine	27	14	258.237	-93.9573	0.83938	0.407315	0.254853	487.052	0.362939	0.997718	0.899281
AP_typical_vs_atypical	L-Glutamine	27	14	1211.1	-1457.18	0.608039	0.547964	0.194633	5754.52	0.314505	0.997718	0.899281
AP_typical_vs_atypical	L-Histidine	27	14	-141.035	-114.804	-0.0443276	0.964985	-0.0147368	-575.153	0.42536	0.997718	0.899281
AP_typical_vs_atypical	Serotonin	27	14	13.4102	-131.331	0.500351	0.621275	0.169193	294.823	0.396334	0.997718	0.899281
AP_typical_vs_atypical	Normetanephrine	27	14	-93.2404	-33.7135	-0.235134	0.815504	-0.0702052	-280.714	0.417245	0.997718	0.899281
AP_typical_vs_atypical	Glycerophosphocholine	27	14	861.314	896.857	-0.0126938	0.989972	-0.00424708	3477.66	0.296617	0.997718	0.899281
AP_typical_vs_atypical	Pimelylcarnitine	26	14	83.0773	-226.033	0.935851	0.356961	0.29981	358.755	0.406719	0.997718	0.899281
AP_typical_vs_atypical	PC(16:0/18:2)	27	14	-699.053	-422.9	-0.952978	0.348597	-0.305113	-286.84	0.414596	0.997718	0.899281
AP_typical_vs_atypical	Hydroxykynurenine	27	14	-73.4206	51.2073	-0.862115	0.396119	-0.280368	-204.842	0.288134	0.997718	0.899281
AP_typical_vs_atypical	Decanoylcarnitine	27	14	-262.039	605.596	-1.55701	0.140328	-0.657956	-481.31	0.383379	0.997718	0.899281
AP_typical_vs_atypical	Dodecanoylcarnitine	22	13	98.6301	48.7334	0.217111	0.829768	0.0607292	292.928	0.425975	0.997718	0.899281
AP_typical_vs_atypical	2-Arachidonylglycerol	17	9	57.1741	-45.3877	0.59376	0.56002	0.180694	291.281	0.345538	0.997718	0.899281
AP_typical_vs_atypical	Linoleylcarnitine	13	8	546.208	-201.156	1.01381	0.330676	0.353818	1377.85	0.318762	0.997718	0.899281
AP_typical_vs_atypical	Arginine	27	14	50.5735	-74.2044	0.684888	0.498034	0.204718	255.721	0.303443	0.997718	0.899281
AP_typical_vs_atypical	Lysine	27	14	1174.11	-1368.27	0.535113	0.596758	0.171993	5711.03	0.35383	0.997718	0.899281
AP_typical_vs_atypical	Glutamic acid	27	14	-39.6086	453.174	-0.986065	0.338797	-0.402171	-470.169	0.353933	0.997718	0.899281
AP_typical_vs_atypical	Pyruvic acid	27	14	-122.011	-173.276	0.286799	0.776227	0.0900009	183.526	0.373495	0.997718	0.899281
AP_typical_vs_atypical	Malonic acid	26	12	-186.694	227.639	-0.958495	0.351276	-0.372031	-474.972	0.390514	0.997718	0.899281
AP_typical_vs_atypical	Guanidoacetic acid	20	9	-8.72429	27.0745	-0.857405	0.408148	-0.39016	-35.4522	0.371688	0.997718	0.899281
AP_typical_vs_atypical	Oxaloacetic acid	27	14	33.4736	-4.61743	0.191806	0.849374	0.0633858	205.791	0.403591	0.997718	0.899281
AP_typical_vs_atypical	Hypoxanthine	27	14	205.027	213.942	-0.0272422	0.978414	-0.00786433	-425.543	0.337272	0.997718	0.899281
AP_typical_vs_atypical	3-methylphenylacetic acid	27	14	39.403	-100.479	0.532163	0.5981	0.1599	354.468	0.331492	0.997718	0.899281
AP_typical_vs_atypical	Orotic acid	26	14	16.1135	-60.7511	0.424465	0.673839	0.127266	249.088	0.340511	0.997718	0.899281
AP_typical_vs_atypical	Plasmalogen(p16:0/20:4)	24	14	-285.608	-172.052	-1.16158	0.256071	-0.398358	-106.088	0.303598	0.997718	0.899281
AP_typical_vs_atypical	PI(36:1)	12	8	-60.1316	-20.9112	-0.813923	0.428312	-0.371683	-82.8762	0.328544	0.997718	0.899281
AP_typical_vs_atypical	L-Serine	27	14	197.127	-196.154	0.429512	0.670981	0.140686	867.237	0.446249	0.997718	0.908406
AP_typical_vs_atypical	Methionine sulfoxide	27	14	-108.045	-125.663	0.141083	0.888926	0.0472838	118.584	0.437741	0.997718	0.908406
AP_typical_vs_atypical	Cytidine monophosphate	22	14	31.4918	4.54794	0.733892	0.468548	0.242348	33.1181	0.446736	0.997718	0.908406
AP_typical_vs_atypical	Dodecenoylcarnitine	24	14	-52.5538	120.17	-1.28655	0.208407	-0.42397	-133.802	0.451547	0.997718	0.908406
AP_typical_vs_atypical	Adenine	27	14	-72.6998	-62.1668	-0.0736567	0.941933	-0.0257433	118.048	0.48857	0.997718	0.90842
AP_typical_vs_atypical	L-Glutamic acid	27	14	168.112	-226.119	0.633277	0.531205	0.196852	592.505	0.482219	0.997718	0.90842
AP_typical_vs_atypical	Citrulline	27	14	-26.7957	-523.178	0.311812	0.758041	0.108863	1242.71	0.501842	0.997718	0.90842
AP_typical_vs_atypical	Hexanoylcarnitine	27	14	96.9998	122.609	-0.0652755	0.948423	-0.0211268	367.544	0.482686	0.997718	0.90842
AP_typical_vs_atypical	Saccharopine	22	13	-20.958	-38.5374	0.366962	0.716204	0.120474	46.1682	0.469045	0.997718	0.90842
AP_typical_vs_atypical	Anandamide	27	14	54.5241	1.61829	0.476619	0.637574	0.157302	94.8281	0.500528	0.997718	0.90842
AP_typical_vs_atypical	N-acetyl spermine	27	14	142.615	116.371	0.042831	0.966175	0.0143744	494.041	0.504678	0.997718	0.90842
AP_typical_vs_atypical	Zymosterol	27	14	152.392	80.1114	0.162506	0.872134	0.0533662	354.572	0.4977	0.997718	0.90842
AP_typical_vs_atypical	Tyrosine	27	14	-628.755	-610.03	-0.020989	0.983443	-0.00740176	719.403	0.480589	0.997718	0.90842
AP_typical_vs_atypical	Indole-3-carboxylic acid	27	14	26.3511	-16.2415	0.327168	0.746046	0.10663	120.663	0.47537	0.997718	0.90842
AP_typical_vs_atypical	L-Carnitine	27	14	-726.253	-536.353	-0.0902596	0.928945	-0.0325824	1470.01	0.518393	0.997718	0.923387
AP_typical_vs_atypical	Sarcosine	27	14	-462.335	-544.215	0.0469293	0.962919	0.015396	1336.38	0.542243	0.997718	0.929197
AP_typical_vs_atypical	Hypotaurine	27	14	-112.526	-39.6827	-0.452848	0.654062	-0.144721	-121.485	0.532986	0.997718	0.929197
AP_typical_vs_atypical	Nicotinic acid	27	14	-29.7842	-45.385	0.507242	0.615508	0.156462	24.9177	0.541109	0.997718	0.929197
AP_typical_vs_atypical	Orotidine monophosphate	14	10	-3.14377	-7.22087	0.0980197	0.922823	0.0391746	-34.7107	0.54339	0.997718	0.929197
AP_typical_vs_atypical	Ceramide(d18:1/12:0)	25	14	-1.71401	-9.80303	0.182329	0.85653	0.0583596	-34.3794	0.563006	0.997718	0.938009
AP_typical_vs_atypical	Taurine	27	14	377.351	418.884	-0.0439309	0.965315	-0.0148685	-677.1	0.565	0.997718	0.938009
AP_typical_vs_atypical	Uridine	27	14	3.62528	27.694	-0.415155	0.680735	-0.126255	-48.7987	0.562165	0.997718	0.938009
AP_typical_vs_atypical	Trimethylamine-N-oxide	27	14	-21.5688	86.6337	-1.04123	0.308378	-0.35839	63.2166	0.577612	0.997718	0.945285
AP_typical_vs_atypical	24,25-Dihydrolanosterol	27	14	46.3301	-54.6874	0.317992	0.752243	0.0902467	-258.323	0.585966	0.997718	0.945285
AP_typical_vs_atypical	Histidine	27	14	-2.53071	-68.5937	0.413933	0.681808	0.129172	112.62	0.585735	0.997718	0.945285
AP_typical_vs_atypical	1-Methylnicotinamide	27	14	62.5969	442.372	-0.831302	0.419954	-0.369466	-219.502	0.612144	0.997718	0.969533
AP_typical_vs_atypical	L-Methionine	27	14	-284.842	-405.272	0.137111	0.892104	0.0470562	509.267	0.618006	0.997718	0.969533
AP_typical_vs_atypical	Methionine	27	14	-234.472	-322.034	0.132111	0.896013	0.0453194	387.741	0.614052	0.997718	0.969533
AP_typical_vs_atypical	Alanine	27	14	-544.375	-336.118	-0.117468	0.907412	-0.0392344	1016.79	0.642128	0.997718	0.970376
AP_typical_vs_atypical	3-Aminoisobutyric acid	27	14	16.7996	-43.1427	0.461963	0.648568	0.161938	72.5179	0.646169	0.997718	0.970376
AP_typical_vs_atypical	Threonine	27	14	-526.252	-801.314	0.190153	0.850869	0.0661189	757.519	0.656732	0.997718	0.970376
AP_typical_vs_atypical	Dimethyl-L-arginine	27	14	40.1085	62.2517	-0.188771	0.851401	-0.0566932	73.0369	0.659181	0.997718	0.970376
AP_typical_vs_atypical	Butyrylcarnitine	27	14	-372.211	12.9791	-0.718396	0.47927	-0.242762	268.23	0.669616	0.997718	0.970376
AP_typical_vs_atypical	3-Hydroxyisovaleryl carnitine	27	14	-49.4966	-7.25128	-0.298224	0.767119	-0.081926	92.5183	0.641217	0.997718	0.970376
AP_typical_vs_atypical	Mevalonic acid	18	10	-29.9765	17.5291	-1.13347	0.277955	-0.514685	-21.4471	0.647014	0.997718	0.970376
AP_typical_vs_atypical	2-Hydroxyglutarate	27	14	41.1175	9.41162	0.325021	0.747585	0.104878	-54.6145	0.666851	0.997718	0.970376
AP_typical_vs_atypical	N-carbamoyl-L-aspartate	27	14	23.0382	-114.398	1.20647	0.239465	0.412657	65.7719	0.632157	0.997718	0.970376
AP_typical_vs_atypical	Indole	27	14	-272.623	-90.3646	-0.800918	0.433059	-0.300135	-74.7092	0.756583	0.997718	0.97135
AP_typical_vs_atypical	L-Valine	27	14	-567.449	-22.6957	-0.627939	0.538125	-0.244231	-284.652	0.749019	0.997718	0.97135
AP_typical_vs_atypical	Creatine	27	14	-1929.64	-1022.55	-0.527654	0.601939	-0.170801	731.069	0.738125	0.997718	0.97135
AP_typical_vs_atypical	Hydroxyproline	27	14	-251.191	-121.408	-0.347195	0.731757	-0.122717	114.881	0.794741	0.997718	0.97135
AP_typical_vs_atypical	L-Tyrosine	27	14	-537.612	-309.568	-0.296029	0.770187	-0.107503	285.251	0.739294	0.997718	0.97135
AP_typical_vs_atypical	Homoarginine	27	14	-187.959	-110.839	-0.38846	0.701516	-0.138647	60.7514	0.789574	0.997718	0.97135
AP_typical_vs_atypical	5-Hydroxyindoleacetic acid	27	14	-86.3965	-18.3179	-0.491495	0.627979	-0.173924	40.3709	0.800024	0.997718	0.97135
AP_typical_vs_atypical	L-Acetylcarnitine	27	14	-232.987	-298.1	0.0361587	0.971453	0.0123112	545.131	0.800715	0.997718	0.97135
AP_typical_vs_atypical	L-Tryptophan	27	14	-1527.46	-493.238	-0.68656	0.501054	-0.263153	-390.671	0.800938	0.997718	0.97135
AP_typical_vs_atypical	Cystine	27	14	-5.20089	56.6048	-0.116258	0.908227	-0.0366312	282.233	0.688657	0.997718	0.97135
AP_typical_vs_atypical	3-Hydroxydodecanoylcarnitine	25	13	-12.6863	53.1159	-0.675507	0.506784	-0.245121	37.6585	0.738205	0.997718	0.97135
AP_typical_vs_atypical	Dephospho-CoA	27	14	12.2942	-4.16883	0.377752	0.7089	0.128403	18.789	0.726402	0.997718	0.97135
AP_typical_vs_atypical	Phosphorylcholine	19	13	-686.997	-380.199	-0.927443	0.361476	-0.323262	-119.188	0.787675	0.997718	0.97135
AP_typical_vs_atypical	Aspartylglycosamine	25	14	8.56264	8.31374	0.00289551	0.997718	0.00107478	37.0805	0.705119	0.997718	0.97135
AP_typical_vs_atypical	Cholesterol	18	14	-157.537	-178.231	0.169191	0.866857	0.0565974	-78.4937	0.686077	0.997718	0.97135
AP_typical_vs_atypical	Myristoylcarnitine	27	14	45.5769	-5.12683	0.270965	0.788299	0.085633	-72.2656	0.761449	0.997718	0.97135
AP_typical_vs_atypical	Tryptophan	27	14	-353.88	-152.203	-0.675717	0.508192	-0.265277	-78.8762	0.794381	0.997718	0.97135
AP_typical_vs_atypical	L-Lactic acid	26	14	292.452	192.359	0.124745	0.901826	0.0438841	368.213	0.724119	0.997718	0.97135
AP_typical_vs_atypical	a-ketoglutarate	27	14	83.9862	-16.1612	0.483083	0.633428	0.165051	-76.8833	0.764142	0.997718	0.97135
AP_typical_vs_atypical	Homogentisic acid	27	14	-116.227	83.1775	-0.528178	0.602733	-0.187365	-127.619	0.764622	0.997718	0.97135
AP_typical_vs_atypical	Uric acid	27	14	-974.49	640.469	-0.524345	0.605582	-0.189246	-1034.98	0.760363	0.997718	0.97135
AP_typical_vs_atypical	Indoleacrylic acid	27	14	-42.7811	-29.672	-0.209329	0.836316	-0.0769073	-28.5532	0.696264	0.997718	0.97135
AP_typical_vs_atypical	11,12-DiHETrE	27	14	-84.8239	123.357	-0.655165	0.52003	-0.243178	-86.8613	0.793001	0.997718	0.97135
AP_typical_vs_atypical	Urea	27	14	-232.802	-2.48671	-0.833976	0.414717	-0.31365	-48.1166	0.870759	0.997718	0.977748
AP_typical_vs_atypical	N-acetyl-L-alanine	27	14	-1853.07	-822.08	-0.617525	0.542183	-0.203494	380.064	0.85607	0.997718	0.977748
AP_typical_vs_atypical	O-Phosphoethanolamine	24	13	6.98728	48.2921	-0.722796	0.478789	-0.276101	-13.964	0.83673	0.997718	0.977748
AP_typical_vs_atypical	1-Methylhistidine	27	14	-84.9458	139.561	-0.915918	0.368496	-0.308309	-57.0638	0.852289	0.997718	0.977748
AP_typical_vs_atypical	N-Acetylornithine	27	14	11.7255	196.645	-0.579269	0.56937	-0.219545	54.25	0.874827	0.997718	0.977748
AP_typical_vs_atypical	N-acetyl-glutamate	27	14	-229.078	628.149	-0.468414	0.644233	-0.16724	-354.356	0.868462	0.997718	0.977748
AP_typical_vs_atypical	Agmatine	21	13	24.7979	-25.0566	0.420257	0.677186	0.137377	-30.2643	0.858461	0.997718	0.977748
AP_typical_vs_atypical	Asparagine	27	14	-438.707	-184.614	-0.978294	0.335923	-0.310098	-66.4999	0.847324	0.997718	0.977748
AP_typical_vs_atypical	a-ketoglutarate.1	27	14	39.0158	-92.5017	0.994358	0.329662	0.335333	27.2041	0.871544	0.997718	0.977748
AP_typical_vs_atypical	2-Keto-L-gluconate	17	13	-70.0216	187.272	-1.28286	0.223714	-0.543273	-61.5807	0.827608	0.997718	0.977748
AP_typical_vs_atypical	PI(38:5)	12	12	-21.5974	-25.6235	0.054153	0.957307	0.0221079	21.8665	0.846466	0.997718	0.977748
AP_typical_vs_atypical	Gluconolactone	26	14	-10.2219	0.828383	-0.223622	0.824902	-0.0763982	10.896	0.862298	0.997718	0.977748
AP_typical_vs_atypical	Guanidinoacetic acid	27	14	-2450.5	-793.185	-0.484195	0.633961	-0.184272	-489.532	0.890886	0.997718	0.98923
AP_typical_vs_atypical	L-leucine + L-Isoleucine	27	14	-2242.78	-128.637	-0.46286	0.648724	-0.173651	-19.2856	0.996818	0.997718	0.996818
AP_typical_vs_atypical	Acetyllysine	27	14	-175.796	-22.9051	-0.559266	0.581742	-0.198918	10.4776	0.972162	0.997718	0.996818
AP_typical_vs_atypical	L-Kynurenine	27	14	-166.447	-24.0914	-0.69011	0.497361	-0.243794	-3.42429	0.988621	0.997718	0.996818
AP_typical_vs_atypical	Isovalerylcarnitine	27	14	-320.613	198.273	-1.19272	0.243654	-0.39381	-25.9668	0.962077	0.997718	0.996818
AP_typical_vs_atypical	1-Methyladenosine	27	14	-24.004	95.3991	-1.02248	0.315658	-0.334546	-6.196	0.966196	0.997718	0.996818
AP_typical_vs_atypical	9-Decenoylcarnitine	27	14	-289.444	103.127	-0.610418	0.548585	-0.225695	-3.10609	0.99665	0.997718	0.996818
AP_typical_vs_atypical	Leucine+isoleucine	27	14	-2462.54	-82.5359	-0.506077	0.618663	-0.190404	-395.699	0.936286	0.997718	0.996818
AP_typical_vs_atypical	L-Threonine	27	14	-129.026	-295.966	0.729842	0.473136	0.256867	-11.3808	0.96641	0.997718	0.996818
AP_typical_vs_atypical	Phenylpropiolic acid	27	14	101.524	-127.512	0.765431	0.451026	0.255181	-11.0227	0.976801	0.997718	0.996818
AP_typical_vs_atypical	Quinolinic Acid	23	10	3.55168	16.1613	-0.187676	0.854548	-0.0914365	0.43082	0.994935	0.997718	0.996818
AP_typical_vs_atypical	p-Aminohippuric acid	26	14	-20.2024	-39.9448	0.120724	0.904952	0.0421385	11.9616	0.951226	0.997718	0.996818
AP_typical_vs_atypical	Cinnamoylglycine	19	12	-4.73943	-18.0253	0.100052	0.921049	0.0353098	7.54326	0.969368	0.997718	0.996818
AP_typical_vs_atypical	Pantothenic acid	27	14	-59.2686	-67.71	0.0739874	0.941606	0.0248239	15.5677	0.912629	0.997718	0.996818
AP_typical_vs_atypical	Pseudouridine	27	14	12.827	12.1664	0.0120916	0.990421	0.00357582	-8.19685	0.917612	0.997718	0.996818
AP_typical_vs_atypical	Inosine	24	14	47.5921	107.423	-0.319729	0.752739	-0.122204	9.58668	0.963044	0.997718	0.996818
AP_typical_vs_atypical	Xanthosine	27	14	22.4894	131.606	-0.572309	0.574036	-0.217742	-22.4034	0.908598	0.997718	0.996818
AP_typical_vs_atypical	PI(36:2)	14	13	-48.3598	-68.1	0.321535	0.750491	0.123153	-7.12556	0.93787	0.997718	0.996818
BPRS_critical_vs_severe	Dimethylglycine	22	19	-397.173	-320.622	-0.150958	0.880906	-0.0481625	-589.995	0.240888	0.969371	0.918642
BPRS_critical_vs_severe	Hypotaurine	22	19	-194.884	36.511	-1.52708	0.134821	-0.471744	-257.061	0.104163	0.854559	0.918642
BPRS_critical_vs_severe	Indole	22	19	-254.773	-158.996	-0.482555	0.633089	-0.156566	-226.366	0.250917	0.87305	0.918642
BPRS_critical_vs_severe	Homocysteine	22	19	-71.8256	40.0137	-0.988119	0.329765	-0.313234	-171.924	0.169301	0.854559	0.918642
BPRS_critical_vs_severe	1-Methylnicotinamide	22	19	336.604	25.1602	1.02533	0.314861	0.301744	526.325	0.135049	0.854559	0.918642
BPRS_critical_vs_severe	L-Phenylalanine	22	19	201.613	-1220.97	1.69251	0.0990799	0.514266	1121.69	0.255014	0.854559	0.918642
BPRS_critical_vs_severe	L-Tryptophan	22	19	-1491.02	-807.597	-0.53109	0.59969	-0.173163	-1647.77	0.192227	0.857022	0.918642
BPRS_critical_vs_severe	L-Kynurenine	22	19	-205.974	-15.7855	-1.01427	0.318661	-0.327963	-256.24	0.1904	0.854559	0.918642
BPRS_critical_vs_severe	Tiglylcarnitine	22	19	347.392	-306.448	1.5528	0.128634	0.477303	524.677	0.26732	0.854559	0.918642
BPRS_critical_vs_severe	Malonylcarnitine	22	19	-74.4769	17.1074	-0.702926	0.486298	-0.216563	-166.53	0.253666	0.854559	0.918642
BPRS_critical_vs_severe	Hexanoylcarnitine	22	19	289.207	-106.687	1.11559	0.273843	0.331234	605.026	0.156885	0.854559	0.918642
BPRS_critical_vs_severe	3-Hydroxyhexanoylcarnitine	22	19	156.84	-95.7515	2.17996	0.0367859	0.65261	284.315	0.0405614	0.854559	0.918642
BPRS_critical_vs_severe	L-Glutarylcarnitine	22	19	246.61	-188.298	2.25282	0.0318129	0.670678	453.521	0.052686	0.854559	0.918642
BPRS_critical_vs_severe	Saccharopine	20	15	-50.953	3.79987	-1.12631	0.268633	-0.38157	-61.4988	0.260487	0.854559	0.918642
BPRS_critical_vs_severe	2-Octenoylcarnitine	22	19	-398.07	-48.6147	-2.08898	0.0475544	-0.688566	-433.528	0.0207946	0.854559	0.918642
BPRS_critical_vs_severe	5-Methylthioadenosine	22	19	-154.681	-233.339	1.4621	0.15186	0.448562	71.6171	0.218316	0.854559	0.918642
BPRS_critical_vs_severe	S-adenosyl-L-homoCysteine	22	19	80.3921	14.3275	0.970803	0.337989	0.306248	80.1567	0.239301	0.854559	0.918642
BPRS_critical_vs_severe	3-Hydroxy-cis-5-tetradecenoylcarnitine	19	17	89.3793	-36.4336	1.07775	0.295231	0.340001	161.638	0.254009	0.854559	0.918642
BPRS_critical_vs_severe	24,25-Dihydrolanosterol	22	19	-197.777	254.547	-1.35675	0.183155	-0.412593	-465.129	0.23085	0.854559	0.918642
BPRS_critical_vs_severe	Ceramide(d18:1/12:0)	20	19	-38.4279	30.9718	-1.60936	0.116448	-0.51786	-75.3686	0.119292	0.854559	0.918642
BPRS_critical_vs_severe	PC(16:0/18:2)	22	19	-816.675	-359.378	-1.62601	0.112968	-0.516947	-540.992	0.0567475	0.854559	0.918642
BPRS_critical_vs_severe	Phosphorylcholine	15	17	-727.05	-417.046	-0.931887	0.358839	-0.326878	-391.421	0.214522	0.854559	0.918642
BPRS_critical_vs_severe	Decanoylcarnitine	22	19	100.371	-42.3613	0.345355	0.732143	0.103235	521.487	0.250617	0.948458	0.918642
BPRS_critical_vs_severe	L-Palmitoylcarnitine	9	14	485.685	-92.5828	1.00278	0.345308	0.541397	912.345	0.114659	0.854559	0.918642
BPRS_critical_vs_severe	Linoleylcarnitine	10	11	762.816	-194.245	0.998164	0.344276	0.458622	1322.81	0.227831	0.854559	0.918642
BPRS_critical_vs_severe	Oleoylcarnitine	11	15	581.129	-126.598	0.989781	0.345618	0.462289	1075.41	0.145946	0.854559	0.918642
BPRS_critical_vs_severe	Vitamin K2	16	13	85.9154	-59.501	1.62045	0.11806	0.57202	173.051	0.0719616	0.854559	0.918642
BPRS_critical_vs_severe	Tryptophan	22	19	-345.323	-215.185	-0.521798	0.606138	-0.170414	-299.403	0.225912	0.857022	0.918642
BPRS_critical_vs_severe	Riboflavin	22	19	-74.7413	39.9933	-1.28759	0.205478	-0.398703	-130.865	0.217223	0.854559	0.918642
BPRS_critical_vs_severe	Aspartic acid	22	19	350.006	-330.962	2.04961	0.048083	0.618393	626.044	0.103265	0.854559	0.918642
BPRS_critical_vs_severe	Glycine	22	19	236.758	-194.603	1.51454	0.138315	0.46187	362.916	0.271823	0.854559	0.918642
BPRS_critical_vs_severe	Pyruvic acid	22	19	-150.634	-126.643	-0.137113	0.891657	-0.0420879	-187.707	0.268662	0.969371	0.918642
BPRS_critical_vs_severe	Glyceric acid	22	19	-16.4549	9.14038	-0.681661	0.499546	-0.213109	-45.6416	0.273981	0.854559	0.918642
BPRS_critical_vs_severe	Pyroglutamic acid	21	18	0.741596	21.1658	-0.519737	0.606343	-0.165028	-52.144	0.241361	0.857022	0.918642
BPRS_critical_vs_severe	Citraconic acid	22	19	69.1234	-64.7736	1.27041	0.211466	0.393473	133.154	0.270756	0.854559	0.918642
BPRS_critical_vs_severe	a-ketoglutarate	22	19	3.94073	102.878	-0.52282	0.604086	-0.163098	-231.17	0.27044	0.857022	0.918642
BPRS_critical_vs_severe	2-Hydroxyglutarate	22	19	18.3602	44.1059	-0.267485	0.790689	-0.0851322	-120.056	0.24761	0.961357	0.918642
BPRS_critical_vs_severe	3-methylphenylacetic acid	22	19	176.87	-222.84	1.54172	0.131783	0.46842	329.038	0.273938	0.854559	0.918642
BPRS_critical_vs_severe	Orotic acid	21	19	113.105	-147.725	1.43414	0.161279	0.441938	247.845	0.245087	0.854559	0.918642
BPRS_critical_vs_severe	Suberic Acid	22	19	510.856	-365.661	1.29286	0.209634	0.376476	992.343	0.223095	0.854559	0.918642
BPRS_critical_vs_severe	Indoleacrylic acid	22	19	-69.2579	-2.46448	-1.26898	0.21235	-0.399676	-83.4033	0.161523	0.854559	0.918642
BPRS_critical_vs_severe	p-Aminohippuric acid	21	19	-117.151	72.4045	-1.30336	0.200447	-0.413484	-199.974	0.205403	0.854559	0.918642
BPRS_critical_vs_severe	Xanthurenic acid	20	17	-78.9415	20.3592	-0.976181	0.335729	-0.315276	-185.494	0.0626793	0.854559	0.918642
BPRS_critical_vs_severe	Pantothenic acid	22	19	-135.857	23.1922	-1.55086	0.129024	-0.48166	-222.307	0.0509143	0.854559	0.918642
BPRS_critical_vs_severe	Pseudouridine	22	19	-4.48706	32.3882	-0.63518	0.529277	-0.200644	-72.153	0.265641	0.856528	0.918642
BPRS_critical_vs_severe	Inosine	19	19	148.368	-9.09803	1.00323	0.325093	0.325492	299.443	0.0771745	0.854559	0.918642
BPRS_critical_vs_severe	Orotidine monophosphate	10	14	-59.9274	34.5038	-2.91134	0.0111013	-1.02596	-103.434	0.0231965	0.854559	0.918642
BPRS_critical_vs_severe	Plasmalogen(p16:0/20:4)	19	19	-295.449	-192.094	-1.11514	0.272537	-0.3618	-140.735	0.0970407	0.854559	0.918642
BPRS_critical_vs_severe	PI(36:1)	10	10	-79.2752	-9.61158	-1.54262	0.141258	-0.68988	-66.9307	0.218797	0.854559	0.918642
BPRS_critical_vs_severe	PI(38:4)	21	19	-355.765	-95.493	-1.16869	0.25057	-0.362166	-416.011	0.0860551	0.854559	0.918642
BPRS_critical_vs_severe	PI(40:5)	8	15	-43.76	6.41619	-0.827736	0.424406	-0.391582	-87.8573	0.127573	0.854559	0.918642
BPRS_critical_vs_severe	Urea	22	19	-160.897	-146.354	-0.0618873	0.950994	-0.019579	-107.796	0.65843	0.969371	0.930308
BPRS_critical_vs_severe	Methylguanidine	21	19	-212.822	-77.6836	-0.617076	0.540965	-0.196014	-211.21	0.401442	0.856528	0.930308
BPRS_critical_vs_severe	Sarcosine	22	19	118.873	-1195.65	0.800926	0.428045	0.249161	537.819	0.766872	0.854559	0.930308
BPRS_critical_vs_severe	Alanine	22	19	144.551	-1188.63	0.81331	0.421003	0.253213	598.682	0.740494	0.854559	0.930308
BPRS_critical_vs_severe	beta-Alanine	22	19	244.442	-165.713	1.36953	0.178826	0.428667	296.902	0.374	0.854559	0.930308
BPRS_critical_vs_severe	3-Aminoisobutyric acid	22	19	-17.6801	12.5555	-0.257426	0.79832	-0.0815023	-118.598	0.360849	0.961357	0.930308
BPRS_critical_vs_severe	L-Serine	22	19	526.673	-474.239	1.1686	0.24968	0.363327	480.59	0.609987	0.854559	0.930308
BPRS_critical_vs_severe	L-Proline	22	19	-101.323	-1752.47	0.496307	0.622468	0.153266	2463.47	0.500088	0.865382	0.930308
BPRS_critical_vs_severe	L-Valine	22	19	-270.173	-510.265	0.332789	0.741513	0.10705	-253.585	0.729869	0.950295	0.930308
BPRS_critical_vs_severe	Threonine	22	19	53.7946	-1400.56	1.13952	0.261488	0.355128	644.907	0.646682	0.854559	0.930308
BPRS_critical_vs_severe	Purine	22	19	-53.8099	-125.839	0.823272	0.415711	0.260108	42.5336	0.665733	0.854559	0.930308
BPRS_critical_vs_severe	Pipecolic acid	22	19	2014.27	-1790.45	1.15442	0.25544	0.360466	2326.59	0.529762	0.854559	0.930308
BPRS_critical_vs_severe	Hydroxyproline	22	19	-98.8787	-331.922	0.701697	0.487287	0.221369	212.765	0.558638	0.854559	0.930308
BPRS_critical_vs_severe	Ornithine	22	19	39.5416	-99.1585	1.16274	0.253048	0.370806	96.8383	0.443812	0.854559	0.930308
BPRS_critical_vs_severe	Methylcysteine	22	19	350.839	-148.946	0.737389	0.46571	0.233692	211.923	0.775354	0.854559	0.930308
BPRS_critical_vs_severe	Adenine	22	19	-24.1216	-121.187	0.757988	0.453272	0.238978	70.7969	0.615453	0.854559	0.930308
BPRS_critical_vs_severe	O-Phosphoethanolamine	20	17	18.9531	24.4959	-0.110263	0.91288	-0.0367215	-15.1966	0.786985	0.969371	0.930308
BPRS_critical_vs_severe	Acetylcholine	22	19	334.794	-89.9197	0.990418	0.328124	0.308773	124.524	0.779329	0.854559	0.930308
BPRS_critical_vs_severe	L-Glutamine	22	19	2509.4	-2258.3	1.12988	0.265465	0.35178	2773.88	0.55896	0.854559	0.930308
BPRS_critical_vs_severe	L-Lysine	22	19	3098.06	-2902.83	1.33308	0.190254	0.411572	4102.19	0.425626	0.854559	0.930308
BPRS_critical_vs_severe	L-Glutamic acid	22	19	392.729	-382.457	1.26336	0.213988	0.393017	449.637	0.518515	0.854559	0.930308
BPRS_critical_vs_severe	L-Histidine	22	19	-384.787	160.532	-1.00397	0.321587	-0.310185	-548.097	0.356692	0.854559	0.930308
BPRS_critical_vs_severe	DL-2-Aminooctanoic acid	22	19	107.536	-86.1932	0.694481	0.491501	0.215569	186.107	0.532549	0.854559	0.930308
BPRS_critical_vs_severe	7-methylguanine	22	19	77.9749	-43.4359	0.845649	0.402939	0.263415	59.5881	0.707789	0.854559	0.930308
BPRS_critical_vs_severe	Methionine sulfoxide	22	19	-55.1715	-182.249	1.12774	0.266416	0.346276	77.0009	0.542292	0.854559	0.930308
BPRS_critical_vs_severe	N-Acetylornithine	22	19	167.106	-31.9317	0.748778	0.458815	0.236686	136.828	0.629775	0.854559	0.930308
BPRS_critical_vs_severe	Citrulline	22	19	352.125	-831.301	0.826708	0.413826	0.261485	514.805	0.736743	0.854559	0.930308
BPRS_critical_vs_severe	Serotonin	22	19	59.1323	-146.183	0.767188	0.447757	0.241001	84.7243	0.768855	0.854559	0.930308
BPRS_critical_vs_severe	L-Tyrosine	22	19	-196.436	-764.627	0.856213	0.397416	0.270024	270.276	0.702413	0.854559	0.930308
BPRS_critical_vs_severe	Normetanephrine	22	19	-203.568	78.3694	-1.09928	0.278499	-0.337223	-246.284	0.388305	0.854559	0.930308
BPRS_critical_vs_severe	Acetyllysine	22	19	-112.178	-136.803	0.0995931	0.921276	0.0318941	-130.064	0.598999	0.969371	0.930308
BPRS_critical_vs_severe	N-acetyl-glutamine	22	19	127.4	-86.8607	0.665023	0.51008	0.208786	86.9644	0.795166	0.854559	0.930308
BPRS_critical_vs_severe	Homoarginine	22	19	-171.415	-150.291	-0.117796	0.906983	-0.0378975	-104.618	0.577058	0.969371	0.930308
BPRS_critical_vs_severe	N-acetyl-glutamate	22	19	742.194	-722.068	0.925814	0.360251	0.287795	718.098	0.684033	0.854559	0.930308
BPRS_critical_vs_severe	5-Hydroxyindoleacetic acid	22	19	-108.197	-10.9907	-0.796559	0.430637	-0.249459	-67.003	0.610028	0.854559	0.930308
BPRS_critical_vs_severe	Dimethyl-L-arginine	22	19	103.65	-17.1495	1.01439	0.316663	0.313101	100.894	0.459311	0.854559	0.930308
BPRS_critical_vs_severe	L-Acetylcarnitine	22	19	-93.2093	-442.813	0.214587	0.831212	0.0661378	-569.462	0.749337	0.969371	0.930308
BPRS_critical_vs_severe	Propionylcarnitine	22	19	43.0108	-382.642	0.778198	0.441149	0.240745	269.004	0.638902	0.854559	0.930308
BPRS_critical_vs_severe	Butyrylcarnitine	22	19	-272.839	-203.448	-0.139818	0.889525	-0.0434425	418.151	0.418753	0.969371	0.930308
BPRS_critical_vs_severe	Adipoylcarnitine	21	19	123.599	-112.284	1.07571	0.29352	0.325276	263.866	0.313666	0.854559	0.930308
BPRS_critical_vs_severe	7-Methylguanosine	22	19	99.8639	-2.55186	1.20426	0.236046	0.367482	97.5857	0.316462	0.854559	0.930308
BPRS_critical_vs_severe	Suberylcarnitine	21	18	267.766	-98.2387	0.995759	0.331155	0.295735	407.873	0.366191	0.854559	0.930308
BPRS_critical_vs_severe	Cytidine monophosphate	19	17	22.2189	19.6666	0.0677218	0.946429	0.0227901	30.6176	0.411361	0.969371	0.930308
BPRS_critical_vs_severe	Anandamide	22	19	81.1241	-15.2591	0.932151	0.356994	0.288836	38.9071	0.738409	0.854559	0.930308
BPRS_critical_vs_severe	Dephospho-CoA	22	19	-9.06765	24.8984	-0.844551	0.403878	-0.266851	-46.4712	0.29089	0.854559	0.930308
BPRS_critical_vs_severe	BMP(18:1/16:0)	7	10	2.03782	-31.3405	0.480508	0.638695	0.23579	31.0012	0.72535	0.873734	0.930308
BPRS_critical_vs_severe	Agmatine	18	16	34.7753	-26.9334	0.514387	0.611442	0.17029	76.9706	0.59861	0.857022	0.930308
BPRS_critical_vs_severe	Hydroxykynurenine	22	19	-64.2044	7.73911	-0.519274	0.606505	-0.160905	-50.027	0.755159	0.857022	0.930308
BPRS_critical_vs_severe	N-acetyl spermine	22	19	416.467	-193.815	1.09304	0.281086	0.339245	348.978	0.56844	0.854559	0.930308
BPRS_critical_vs_severe	Nicotinamide Riboside	14	9	60.7186	-41.7063	1.29341	0.209919	0.499866	103.609	0.321989	0.854559	0.930308
BPRS_critical_vs_severe	Octanoylcarnitine	22	19	-189.443	-9.73731	-0.533459	0.59675	-0.164636	-149.662	0.671507	0.857022	0.930308
BPRS_critical_vs_severe	9-Decenoylcarnitine	22	19	-20.0263	-312.138	0.549077	0.586213	0.167549	406.712	0.50406	0.857022	0.930308
BPRS_critical_vs_severe	Aspartylglycosamine	20	19	17.8532	-1.40029	0.25849	0.797542	0.0832163	-31.175	0.700668	0.961357	0.930308
BPRS_critical_vs_severe	Dodecenoylcarnitine	20	18	44.8939	-26.4884	0.538255	0.59383	0.172139	108.899	0.450644	0.857022	0.930308
BPRS_critical_vs_severe	Dodecanoylcarnitine	18	17	208.49	-55.8482	0.988593	0.334747	0.326077	288.842	0.345386	0.854559	0.930308
BPRS_critical_vs_severe	Cholesterol	15	17	-211.508	-126.958	-0.660087	0.514253	-0.232797	-117.935	0.395399	0.854559	0.930308
BPRS_critical_vs_severe	Myristoylcarnitine	22	19	-50.5142	119.48	-0.916621	0.365425	-0.289988	-93.2174	0.634904	0.854559	0.930308
BPRS_critical_vs_severe	2-Arachidonylglycerol	13	13	106.529	-63.1847	0.768561	0.455586	0.301454	208.131	0.42043	0.854559	0.930308
BPRS_critical_vs_severe	Tyrosine	22	19	-297.195	-998.87	0.893567	0.377187	0.280199	349.792	0.67855	0.854559	0.930308
BPRS_critical_vs_severe	Arginine	22	19	140.793	-145.833	1.57243	0.124095	0.48194	216.677	0.290644	0.854559	0.930308
BPRS_critical_vs_severe	Lysine	22	19	2687.54	-2451.61	1.13526	0.263199	0.352023	3003.28	0.556276	0.854559	0.930308
BPRS_critical_vs_severe	Glutamic acid	22	19	71.2219	195.164	-0.306878	0.761121	-0.0994002	-342.773	0.413648	0.955539	0.930308
BPRS_critical_vs_severe	Asparagine	22	19	-456.731	-230.611	-0.867952	0.391303	-0.27557	-214.671	0.449706	0.854559	0.930308
BPRS_critical_vs_severe	L-Lactic acid	22	18	291.658	215.572	0.10416	0.917633	0.0333557	-348.489	0.661036	0.969371	0.930308
BPRS_critical_vs_severe	Malonic acid	20	18	-134.905	31.9843	-0.453464	0.653031	-0.147964	-255.589	0.506342	0.879279	0.930308
BPRS_critical_vs_severe	Guanidoacetic acid	16	13	9.31877	-6.14739	0.44213	0.662196	0.166295	9.96419	0.781229	0.884653	0.930308
BPRS_critical_vs_severe	L-Threonine	22	19	-198.268	-171.86	-0.129174	0.897892	-0.0403292	-211.106	0.340769	0.969371	0.930308
BPRS_critical_vs_severe	Taurine	22	19	-9.67961	856.095	-0.994266	0.326622	-0.3139	-676.2	0.485845	0.854559	0.930308
BPRS_critical_vs_severe	Itaconic acid	22	19	28.2541	-29.7102	0.664408	0.510349	0.206559	34.8388	0.726868	0.854559	0.930308
BPRS_critical_vs_severe	Ketoleucine	22	19	38.0409	-31.5253	0.682085	0.499232	0.210266	45.8111	0.692635	0.854559	0.930308
BPRS_critical_vs_severe	Oxaloacetic acid	22	19	113.55	-87.3141	1.09373	0.280783	0.339076	116.007	0.569524	0.854559	0.930308
BPRS_critical_vs_severe	Hypoxanthine	22	19	306.925	93.608	0.6379	0.528714	0.189054	281.566	0.442959	0.856528	0.930308
BPRS_critical_vs_severe	Phenylpropiolic acid	22	19	-2.82617	53.5866	-0.199156	0.843201	-0.0624058	-303.302	0.328961	0.969371	0.930308
BPRS_critical_vs_severe	a-ketoglutarate.1	22	19	-16.0423	5.8596	-0.176509	0.86082	-0.0551378	-120.414	0.383339	0.969371	0.930308
BPRS_critical_vs_severe	Mevalonic acid	16	12	-16.5841	-8.24506	-0.215605	0.831774	-0.0876142	-25.0679	0.47716	0.969371	0.930308
BPRS_critical_vs_severe	Xanthine	22	19	64.6133	159.348	-0.671187	0.507561	-0.218023	-50.2571	0.745348	0.854559	0.930308
BPRS_critical_vs_severe	Allantoin	10	6	16.9918	-73.5291	1.92404	0.0767771	0.929539	44.5759	0.473278	0.854559	0.930308
BPRS_critical_vs_severe	Indole-3-carboxylic acid	22	19	47.0827	-29.0379	0.621194	0.538111	0.191219	35.5206	0.799739	0.856528	0.930308
BPRS_critical_vs_severe	Quinolinic Acid	18	15	-4.61932	21.7633	-0.521059	0.60794	-0.192057	-41.7957	0.446224	0.857022	0.930308
BPRS_critical_vs_severe	Homogentisic acid	22	19	-2.43136	-101.06	0.294546	0.769949	0.092395	-152.398	0.664692	0.955539	0.930308
BPRS_critical_vs_severe	Uric acid	22	19	-14.2617	-896.363	0.328073	0.744676	0.103075	-1156.33	0.679585	0.950295	0.930308
BPRS_critical_vs_severe	Ascorbic acid	22	19	169.074	-180.977	1.32197	0.194317	0.4024	283.014	0.358421	0.854559	0.930308
BPRS_critical_vs_severe	N-carbamoyl-L-aspartate	22	19	-18.1821	-30.5019	0.114864	0.909182	0.0362741	-76.6265	0.498581	0.969371	0.930308
BPRS_critical_vs_severe	Azelaic acid	21	17	1018.57	315.287	0.421514	0.676055	0.130888	1004.73	0.603985	0.892182	0.930308
BPRS_critical_vs_severe	2-Keto-L-gluconate	15	15	102.704	-19.7591	0.687898	0.501312	0.251185	198.722	0.316069	0.854559	0.930308
BPRS_critical_vs_severe	Cinnamoylglycine	14	17	49.342	-58.6553	0.771417	0.448896	0.290161	107.993	0.474714	0.854559	0.930308
BPRS_critical_vs_severe	Uridine	22	19	-5.34867	31.751	-0.627206	0.534196	-0.19521	-60.7922	0.38019	0.856528	0.930308
BPRS_critical_vs_severe	glucose-1-phosphate	22	19	-35.038	115.326	-1.02978	0.310232	-0.327489	-128.714	0.429083	0.854559	0.930308
BPRS_critical_vs_severe	Xanthosine	22	19	55.5359	64.6268	-0.0559483	0.955748	-0.0180408	-77.0904	0.631704	0.969371	0.930308
BPRS_critical_vs_severe	11,12-DiHETrE	22	19	10.7079	-42.0435	0.191483	0.849315	0.0612233	-138.568	0.611577	0.969371	0.930308
BPRS_critical_vs_severe	Hexose Disaccharide Pool	17	17	-182.13	125.824	-0.73556	0.471377	-0.252295	-267.519	0.569759	0.854559	0.930308
BPRS_critical_vs_severe	PI(36:4)	14	18	-13.7245	8.32063	-0.122838	0.903583	-0.0472541	-76.0753	0.668628	0.969371	0.930308
BPRS_critical_vs_severe	PI(36:2)	10	17	-72.4204	-49.302	-0.376609	0.710184	-0.144311	-29.3716	0.647602	0.927034	0.930308
BPRS_critical_vs_severe	PI(38:5)	8	16	-11.7493	-29.541	0.195617	0.848808	0.0978023	-33.6697	0.700607	0.969371	0.930308
BPRS_critical_vs_severe	PI(38:3)	16	19	-101.339	-94.4371	-0.0631103	0.950254	-0.022519	-60.261	0.575125	0.969371	0.930308
BPRS_critical_vs_severe	Gluconolactone	21	19	6.28823	-20.3276	0.586014	0.561332	0.184707	13.176	0.797465	0.857022	0.930308
BPRS_critical_vs_severe	Glycerophosphocholine	22	19	615.187	1172.49	-0.207469	0.836967	-0.0666315	-624.694	0.821701	0.969371	0.949398
BPRS_critical_vs_severe	Trimethylamine-N-oxide	22	19	-23.5615	60.4667	-0.864679	0.393523	-0.276922	13.5293	0.885455	0.854559	0.959564
BPRS_critical_vs_severe	Histamine	20	12	15.2175	16.8673	-0.0202079	0.984026	-0.00700269	17.7585	0.864597	0.984026	0.959564
BPRS_critical_vs_severe	Creatinine	22	19	60.125	94.9822	-0.0575523	0.954511	-0.0186927	-86.5177	0.890321	0.969371	0.959564
BPRS_critical_vs_severe	Guanidinoacetic acid	22	19	-1150.92	-2734.11	0.551093	0.585234	0.176036	-367.522	0.900715	0.857022	0.959564
BPRS_critical_vs_severe	L-Methionine	22	19	-2.28853	-700.748	0.882872	0.382773	0.275535	103.738	0.902236	0.854559	0.959564
BPRS_critical_vs_severe	L-Carnitine	22	19	-304.944	-1074.16	0.418208	0.678267	0.132264	-379.486	0.840392	0.892182	0.959564
BPRS_critical_vs_severe	1-Methylhistidine	22	19	-69.5743	62.6814	-0.567555	0.573971	-0.180379	-43.9708	0.862026	0.857022	0.959564
BPRS_critical_vs_severe	Cystine	22	19	87.868	-67.4239	0.293003	0.771137	0.0921263	-70.6145	0.903449	0.955539	0.959564
BPRS_critical_vs_severe	Pimelylcarnitine	21	19	23.7841	-79.1534	0.308181	0.759849	0.0989097	-67.9596	0.850567	0.955539	0.959564
BPRS_critical_vs_severe	3-Hydroxydodecanoylcarnitine	21	17	3.95821	17.0722	-0.147645	0.883513	-0.0485211	-16.3488	0.868676	0.969371	0.959564
BPRS_critical_vs_severe	Methionine	22	19	-0.996668	-569.332	0.958205	0.343869	0.297466	122.734	0.846916	0.854559	0.959564
BPRS_critical_vs_severe	Nicotinic acid	22	19	-28.5853	-42.6677	0.466154	0.643945	0.141193	-5.06576	0.880678	0.873926	0.959564
BPRS_critical_vs_severe	Eicosapentaenoic acid	22	18	-17.5246	-31.4474	0.123225	0.902589	0.0378698	17.429	0.895727	0.969371	0.959564
BPRS_critical_vs_severe	Isovalerylcarnitine	22	19	-151.792	-133.752	-0.0434304	0.96558	-0.0134478	46.5564	0.917745	0.97126	0.968731
BPRS_critical_vs_severe	Zymosterol	22	19	-13.4338	291.142	-0.729703	0.469934	-0.226297	-40.1498	0.92614	0.854559	0.971595
BPRS_critical_vs_severe	1-Methyladenosine	22	19	30.2659	1.13839	0.259883	0.796322	0.0806199	8.7735	0.942048	0.961357	0.982258
BPRS_critical_vs_severe	Betaine	20	19	-15.2891	-43.0384	0.239004	0.812427	0.0765896	4.34242	0.972837	0.969371	0.990469
BPRS_critical_vs_severe	Creatine	22	19	-1674.36	-1556.84	-0.070711	0.943992	-0.0220531	34.6972	0.984677	0.969371	0.990469
BPRS_critical_vs_severe	L-leucine + L-Isoleucine	22	19	-471.742	-2735.66	0.587186	0.560785	0.186132	-160.653	0.967896	0.857022	0.990469
BPRS_critical_vs_severe	3-Hydroxyisovaleryl carnitine	22	19	11.9518	-89.5193	0.658678	0.514734	0.197627	5.59422	0.972815	0.854559	0.990469
BPRS_critical_vs_severe	Leucine+isoleucine	22	19	-410.544	-3084.84	0.679372	0.501156	0.214312	93.1909	0.981806	0.854559	0.990469
BPRS_critical_vs_severe	Histidine	22	19	34.2785	-93.8299	0.806674	0.424817	0.252064	-3.89764	0.981811	0.854559	0.990469
BPRS_critical_vs_severe	N-acetyl-L-alanine	22	19	-1539.97	-1455.94	-0.0529633	0.958033	-0.0165059	6.96303	0.996789	0.969371	0.996789
Clozapine_yes_vs_no	Methylguanidine	11	29	-492.231	-18.3004	-2.61752	0.0133195	-0.720252	-598.478	0.0216663	0.984489	0.775797
Clozapine_yes_vs_no	Dimethylglycine	11	30	413.923	-646.092	1.29317	0.223328	0.699571	1054.42	0.0499406	0.984489	0.775797
Clozapine_yes_vs_no	Purine	11	30	-221.272	-38.0256	-2.26121	0.0328217	-0.687174	-202.987	0.0518044	0.984489	0.775797
Clozapine_yes_vs_no	Homocysteine	11	30	167.233	-88.6488	1.78409	0.0966841	0.747314	311.139	0.018972	0.984489	0.775797
Clozapine_yes_vs_no	1-Methylnicotinamide	11	30	590.572	46.2342	0.948745	0.364434	0.536475	708.509	0.0622076	0.984489	0.775797
Clozapine_yes_vs_no	L-Phenylalanine	11	30	-1788.73	30.4373	-2.57979	0.0140541	-0.66435	-2133.6	0.0423035	0.984489	0.775797
Clozapine_yes_vs_no	N-acetyl-glutamine	11	30	-412.114	189.524	-2.0255	0.0532752	-0.604536	-802.661	0.0222421	0.984489	0.775797
Clozapine_yes_vs_no	Isovalerylcarnitine	11	30	288.871	-301.944	1.12356	0.279462	0.449489	827.228	0.0849176	0.984489	0.775797
Clozapine_yes_vs_no	Pimelylcarnitine	11	29	-346.785	96.9028	-1.44907	0.159058	-0.434119	-685.788	0.0745143	0.984489	0.775797
Clozapine_yes_vs_no	Dephospho-CoA	11	30	-63.5999	32.4393	-2.31777	0.0318821	-0.794841	-102.12	0.028498	0.984489	0.775797
Clozapine_yes_vs_no	BMP(18:1/16:0)	3	14	-116.205	3.53388	-1.7858	0.147954	-0.892887	-250.51	0.0370148	0.984489	0.775797
Clozapine_yes_vs_no	Decanoylcarnitine	11	30	434.555	-112.56	0.76407	0.461097	0.401693	816.808	0.0947481	0.984489	0.775797
Clozapine_yes_vs_no	Dodecenoylcarnitine	9	29	158.292	-34.6049	1.18661	0.257398	0.473162	309.129	0.0654098	0.984489	0.775797
Clozapine_yes_vs_no	Riboflavin	11	30	112.862	-70.864	1.57035	0.139024	0.652488	193.892	0.0898667	0.984489	0.775797
Clozapine_yes_vs_no	Glyceric acid	11	30	65.2116	-30.189	2.2661	0.037553	0.845944	108.626	0.0131427	0.984489	0.775797
Clozapine_yes_vs_no	Pyroglutamic acid	11	28	62.8302	-10.5205	1.87298	0.0744228	0.613865	84.327	0.0681978	0.984489	0.775797
Clozapine_yes_vs_no	Xanthine	11	30	271.136	48.8866	1.62823	0.117911	0.522464	275.522	0.0952734	0.984489	0.775797
Clozapine_yes_vs_no	N-carbamoyl-L-aspartate	11	30	171.803	-95.6458	2.55809	0.0185496	0.843109	218.881	0.0698212	0.984489	0.775797
Clozapine_yes_vs_no	Indoleacrylic acid	11	30	41.592	-67.6004	1.83382	0.0844941	0.66907	115.509	0.072239	0.984489	0.775797
Clozapine_yes_vs_no	2-Keto-L-gluconate	8	22	343.368	-68.3077	1.28431	0.239865	0.90658	407.264	0.0437832	0.984489	0.775797
Clozapine_yes_vs_no	Inosine	10	28	243.416	7.57038	0.978594	0.349656	0.492629	311.976	0.0868008	0.984489	0.775797
Clozapine_yes_vs_no	Taurine	11	30	1551.66	-33.8461	1.53063	0.146115	0.587449	1697.58	0.102421	0.984489	0.796089
Clozapine_yes_vs_no	Urea	11	30	74.641	-238.05	0.964872	0.352632	0.428881	370.557	0.157162	0.984489	0.901453
Clozapine_yes_vs_no	Trimethylamine-N-oxide	11	30	75.4225	-6.63775	0.772283	0.449881	0.26977	151.619	0.13159	0.984489	0.901453
Clozapine_yes_vs_no	Histamine	9	23	-74.8967	51.3403	-2.0356	0.0507688	-0.553186	-138.304	0.166898	0.984489	0.901453
Clozapine_yes_vs_no	Betaine	9	30	-165.779	12.2834	-1.71053	0.101133	-0.502552	-202.187	0.171618	0.984489	0.901453
Clozapine_yes_vs_no	N-acetyl-L-alanine	11	30	-529.769	-1857.15	0.687778	0.501724	0.26257	2370.37	0.202808	0.984489	0.901453
Clozapine_yes_vs_no	Creatine	11	30	-732.149	-1945.41	0.613419	0.54815	0.228896	2321.6	0.232912	0.984489	0.901453
Clozapine_yes_vs_no	N-Acetylornithine	11	30	282.686	-1.33075	0.811202	0.431164	0.339252	359.861	0.240224	0.984489	0.901453
Clozapine_yes_vs_no	Normetanephrine	11	30	-305.373	12.3206	-0.976287	0.344314	-0.380004	-384.1	0.213813	0.984489	0.901453
Clozapine_yes_vs_no	5-Hydroxyindoleacetic acid	11	30	-193.481	-15.3621	-1.26181	0.224483	-0.46337	-199.038	0.158666	0.984489	0.901453
Clozapine_yes_vs_no	Saccharopine	10	25	-62.0401	-13.6664	-0.799677	0.43773	-0.334908	-70.0488	0.232609	0.984489	0.901453
Clozapine_yes_vs_no	2-Octenoylcarnitine	11	30	-92.3496	-288.846	0.85795	0.406309	0.370337	245.726	0.242496	0.984489	0.901453
Clozapine_yes_vs_no	PC(16:0/18:2)	11	30	-928.901	-485.904	-1.66097	0.108859	-0.496309	-430.093	0.169617	0.984489	0.901453
Clozapine_yes_vs_no	Glutamic acid	11	30	572.756	-34.1771	1.01449	0.331242	0.498431	659.82	0.143968	0.984489	0.901453
Clozapine_yes_vs_no	Malonic acid	9	29	286.296	-162.036	0.896828	0.389298	0.402429	696.251	0.122144	0.984489	0.901453
Clozapine_yes_vs_no	L-Threonine	11	30	50.0219	-272.582	1.55095	0.135879	0.505371	321.204	0.180202	0.984489	0.901453
Clozapine_yes_vs_no	Ketoleucine	11	30	-97.2267	43.5805	-1.62591	0.113083	-0.431199	-156.972	0.208648	0.984489	0.901453
Clozapine_yes_vs_no	Hypoxanthine	11	30	486.143	106.111	1.05898	0.30121	0.339202	487.915	0.218884	0.984489	0.901453
Clozapine_yes_vs_no	Homogentisic acid	11	30	347.761	-193.3	1.29807	0.214589	0.520246	535.656	0.15607	0.984489	0.901453
Clozapine_yes_vs_no	Uric acid	11	30	2803.31	-1606.03	1.29069	0.217702	0.529187	4310.7	0.151514	0.984489	0.901453
Clozapine_yes_vs_no	Xanthurenic acid	10	27	62.7879	-68.9112	1.16839	0.25871	0.420322	144.05	0.179773	0.984489	0.901453
Clozapine_yes_vs_no	Uridine	11	30	73.885	-10.9046	1.48663	0.149879	0.453252	93.8751	0.210556	0.984489	0.901453
Clozapine_yes_vs_no	Xanthosine	11	30	227.423	-1.73184	1.01946	0.32754	0.464763	212.303	0.220974	0.984489	0.901453
Clozapine_yes_vs_no	Eicosapentaenoic acid	11	29	98.0769	-70.0152	0.952029	0.360687	0.467486	188.141	0.185813	0.984489	0.901453
Clozapine_yes_vs_no	PI(40:5)	6	17	54.1238	-34.0341	1.00065	0.358855	0.710319	76.7175	0.240298	0.984489	0.901453
Clozapine_yes_vs_no	L-Valine	11	30	207.477	-597.37	0.77476	0.453471	0.363166	844.51	0.287231	0.984489	0.926727
Clozapine_yes_vs_no	N-acetyl-glutamate	11	30	1376.78	-417.854	0.888114	0.388871	0.353441	2123.31	0.265221	0.984489	0.926727
Clozapine_yes_vs_no	Cholesterol	8	24	-315.886	-116.826	-1.86543	0.07438	-0.561049	-180.691	0.2714	0.984489	0.926727
Clozapine_yes_vs_no	Leucine+isoleucine	11	30	1689.03	-2874.11	0.831876	0.420799	0.368564	4894.55	0.26689	0.984489	0.926727
Clozapine_yes_vs_no	Guanidoacetic acid	9	20	38.8194	-14.0095	1.3662	0.194572	0.588011	38.1426	0.286292	0.984489	0.926727
Clozapine_yes_vs_no	a-ketoglutarate	11	30	235.243	-18.2103	1.27309	0.217591	0.424029	258.675	0.257115	0.984489	0.926727
Clozapine_yes_vs_no	11,12-DiHETrE	11	30	230.772	-103.392	0.897134	0.386116	0.393795	318.261	0.280796	0.984489	0.926727
Clozapine_yes_vs_no	beta-Alanine	11	30	-179.777	140.224	-0.912601	0.374212	-0.330347	-376.297	0.299698	0.984489	0.931788
Clozapine_yes_vs_no	Phenylpropiolic acid	11	30	304.069	-79.6263	1.45436	0.157785	0.432347	352.689	0.296632	0.984489	0.931788
Clozapine_yes_vs_no	Gluconolactone	11	29	31.0807	-20.5538	1.06753	0.298563	0.361597	55.536	0.309343	0.984489	0.9446
Clozapine_yes_vs_no	Guanidinoacetic acid	11	30	323.09	-2694.07	0.746738	0.469098	0.338047	3036.65	0.340536	0.984489	0.956676
Clozapine_yes_vs_no	L-leucine + L-Isoleucine	11	30	1442.53	-2607.46	0.75352	0.464902	0.335301	4236.75	0.326148	0.984489	0.956676
Clozapine_yes_vs_no	L-Tryptophan	11	30	-301.996	-1494.16	0.696101	0.498656	0.303738	1329.98	0.336471	0.984489	0.956676
Clozapine_yes_vs_no	9-Decenoylcarnitine	11	30	241.458	-300.908	0.704179	0.494041	0.313074	623.318	0.345383	0.984489	0.956676
Clozapine_yes_vs_no	Tryptophan	11	30	-105.854	-350.707	0.742487	0.470979	0.322839	268.095	0.321015	0.984489	0.956676
Clozapine_yes_vs_no	Asparagine	11	30	-230.925	-396.317	0.554308	0.586571	0.200417	290.18	0.346865	0.984489	0.956676
Clozapine_yes_vs_no	Sarcosine	11	30	-267.579	-571.957	0.161302	0.87369	0.0572503	506.642	0.797585	0.984489	0.978346
Clozapine_yes_vs_no	Alanine	11	30	-188.586	-577.645	0.199429	0.844358	0.0733237	627.626	0.749812	0.984489	0.978346
Clozapine_yes_vs_no	3-Aminoisobutyric acid	11	30	60.2043	-27.0885	0.583787	0.568491	0.236453	74.3975	0.600084	0.984489	0.978346
Clozapine_yes_vs_no	L-Serine	11	30	456.148	-81.3787	0.534696	0.599722	0.192571	421.519	0.681335	0.984489	0.978346
Clozapine_yes_vs_no	Hypotaurine	11	30	-39.6969	-105.236	0.32897	0.746807	0.130116	116.403	0.506109	0.984489	0.978346
Clozapine_yes_vs_no	Creatinine	11	30	265.297	6.97139	0.308276	0.762943	0.1388	186.225	0.785058	0.984489	0.978346
Clozapine_yes_vs_no	L-Proline	11	30	-836.789	-877.375	0.0116221	0.990835	0.00375581	1667	0.675765	0.990835	0.978346
Clozapine_yes_vs_no	Indole	11	30	-114.837	-245.424	0.501595	0.624133	0.213793	155.807	0.470582	0.984489	0.978346
Clozapine_yes_vs_no	Threonine	11	30	53.4322	-867.165	0.560335	0.583707	0.222302	799.768	0.601426	0.984489	0.978346
Clozapine_yes_vs_no	Pipecolic acid	11	30	-26.1851	352.78	-0.10439	0.917934	-0.0353137	-732.342	0.856229	0.986273	0.978346
Clozapine_yes_vs_no	Hydroxyproline	11	30	-34.5295	-270.068	0.549816	0.591001	0.223462	261.251	0.509212	0.984489	0.978346
Clozapine_yes_vs_no	Ornithine	11	30	-13.8767	-28.7151	0.105387	0.917349	0.0389814	-39.3119	0.776066	0.986273	0.978346
Clozapine_yes_vs_no	Methylcysteine	11	30	290.923	56.2778	0.329495	0.745165	0.109075	150.353	0.852525	0.984489	0.978346
Clozapine_yes_vs_no	Adenine	11	30	-12.8903	-89.7145	0.529692	0.602964	0.188434	105.856	0.489575	0.984489	0.978346
Clozapine_yes_vs_no	O-Phosphoethanolamine	11	26	28.0922	18.7107	0.151775	0.881432	0.0621689	29.8447	0.608738	0.984489	0.978346
Clozapine_yes_vs_no	Acetylcholine	11	30	30.2324	177.481	-0.320267	0.752036	-0.105865	-411.439	0.392849	0.984489	0.978346
Clozapine_yes_vs_no	L-Lysine	11	30	-797.855	725.998	-0.32262	0.749994	-0.102384	-1866.4	0.74017	0.984489	0.978346
Clozapine_yes_vs_no	L-Glutamic acid	11	30	-229.798	130.038	-0.542061	0.593691	-0.179453	-530.488	0.483918	0.984489	0.978346
Clozapine_yes_vs_no	L-Methionine	11	30	8.21584	-448.498	0.467937	0.646341	0.178996	409.497	0.655617	0.984489	0.978346
Clozapine_yes_vs_no	L-Histidine	11	30	-208.862	-103.924	-0.160108	0.874741	-0.0589745	-83.5127	0.898	0.984489	0.978346
Clozapine_yes_vs_no	DL-2-Aminooctanoic acid	11	30	6.4936	21.8897	-0.0460995	0.963787	-0.0170292	122.472	0.706517	0.986273	0.978346
Clozapine_yes_vs_no	L-Carnitine	11	30	-1363.96	-403.807	-0.384517	0.706716	-0.165183	-1263.16	0.537051	0.984489	0.978346
Clozapine_yes_vs_no	7-methylguanine	11	30	-33.6238	42.0009	-0.49771	0.62393	-0.163054	-77.2114	0.655391	0.984489	0.978346
Clozapine_yes_vs_no	Methionine sulfoxide	11	30	-75.3569	-128.252	0.380925	0.708232	0.142225	77.5402	0.573184	0.984489	0.978346
Clozapine_yes_vs_no	1-Methylhistidine	11	30	50.0125	-29.6609	0.290835	0.774872	0.108335	116.2	0.672799	0.984489	0.978346
Clozapine_yes_vs_no	Citrulline	11	30	965.784	-622.387	0.922986	0.370108	0.352246	1321.3	0.426288	0.984489	0.978346
Clozapine_yes_vs_no	Serotonin	11	30	122.077	-93.9802	0.678218	0.507263	0.253367	156.461	0.617735	0.984489	0.978346
Clozapine_yes_vs_no	L-Tyrosine	11	30	-92.7818	-594.296	0.580732	0.57061	0.237468	582.502	0.448011	0.984489	0.978346
Clozapine_yes_vs_no	Acetyllysine	11	30	-55.3096	-148.625	0.287113	0.77838	0.121027	75.7974	0.778674	0.984489	0.978346
Clozapine_yes_vs_no	Homoarginine	11	30	-157.847	-163.011	0.0252257	0.980176	0.00926368	26.1752	0.898247	0.986273	0.978346
Clozapine_yes_vs_no	Dimethyl-L-arginine	11	30	-12.3084	69.6615	-0.597268	0.557844	-0.210747	-74.0693	0.618594	0.984489	0.978346
Clozapine_yes_vs_no	L-Acetylcarnitine	11	30	-611.21	-124.692	-0.229109	0.822005	-0.0920668	-1031.6	0.594486	0.984489	0.978346
Clozapine_yes_vs_no	L-Kynurenine	11	30	-61.0001	-138.678	0.31455	0.757895	0.132343	96.3693	0.654706	0.984489	0.978346
Clozapine_yes_vs_no	Butyrylcarnitine	11	30	-367.603	-194.145	-0.414276	0.681184	-0.108699	268.861	0.634076	0.984489	0.978346
Clozapine_yes_vs_no	Cystine	11	30	78.5672	-7.07321	0.145064	0.886264	0.0507631	131.579	0.835501	0.984489	0.978346
Clozapine_yes_vs_no	Tiglylcarnitine	11	30	-73.0476	87.4548	-0.341413	0.736373	-0.113979	-181.961	0.726016	0.984489	0.978346
Clozapine_yes_vs_no	Malonylcarnitine	11	30	32.7473	-55.7891	0.49723	0.626989	0.20902	21.2048	0.894805	0.984489	0.978346
Clozapine_yes_vs_no	Hexanoylcarnitine	11	30	193.228	73.6668	0.259433	0.798688	0.0987287	241.719	0.608106	0.984489	0.978346
Clozapine_yes_vs_no	3-Hydroxyisovaleryl carnitine	11	30	-101.061	-10.8753	-0.578243	0.56831	-0.175311	-116.636	0.512683	0.984489	0.978346
Clozapine_yes_vs_no	3-Hydroxyhexanoylcarnitine	11	30	25.0219	45.1985	-0.150928	0.881494	-0.049462	21.6989	0.889298	0.984489	0.978346
Clozapine_yes_vs_no	L-Glutarylcarnitine	11	30	72.6228	34.9635	0.16368	0.871654	0.0549522	124.922	0.632978	0.984489	0.978346
Clozapine_yes_vs_no	1-Methyladenosine	11	30	-7.618	25.7093	-0.262676	0.795788	-0.0922466	-20.0007	0.879004	0.984489	0.978346
Clozapine_yes_vs_no	Adipoylcarnitine	11	29	-108.909	57.2477	-0.956998	0.344755	-0.227228	-83.4485	0.772018	0.984489	0.978346
Clozapine_yes_vs_no	7-Methylguanosine	11	30	-3.15514	72.7742	-0.868381	0.394006	-0.269763	-82.27	0.439317	0.984489	0.978346
Clozapine_yes_vs_no	5-Methylthioadenosine	11	30	-200.543	-187.682	-0.205486	0.839463	-0.0715254	-9.20429	0.885734	0.984489	0.978346
Clozapine_yes_vs_no	Suberylcarnitine	11	28	-96.2572	175.486	-0.982818	0.334282	-0.218199	-103.119	0.830138	0.984489	0.978346
Clozapine_yes_vs_no	Cytidine monophosphate	9	27	48.5941	11.8202	0.791408	0.443994	0.331919	15.0928	0.712869	0.984489	0.978346
Clozapine_yes_vs_no	3-Hydroxydodecanoylcarnitine	11	27	-57.9346	37.4308	-1.25995	0.216733	-0.357603	-51.3103	0.607916	0.984489	0.978346
Clozapine_yes_vs_no	24,25-Dihydrolanosterol	11	30	103.868	-21.9086	0.343684	0.734535	0.112404	80.3041	0.850855	0.984489	0.978346
Clozapine_yes_vs_no	Ceramide(d18:1/12:0)	11	28	-20.3285	1.55433	-0.458146	0.651902	-0.158233	-28.6706	0.587698	0.984489	0.978346
Clozapine_yes_vs_no	Agmatine	11	23	74.1214	-26.9702	0.707155	0.489384	0.280436	89.2513	0.553187	0.984489	0.978346
Clozapine_yes_vs_no	Phosphorylcholine	8	24	-725.134	-508.102	-0.665534	0.514414	-0.226824	-140.556	0.694805	0.984489	0.978346
Clozapine_yes_vs_no	Hydroxykynurenine	11	30	-107.261	-2.85269	-0.672629	0.509589	-0.234041	-91.5608	0.599641	0.984489	0.978346
Clozapine_yes_vs_no	N-acetyl spermine	11	30	223.195	100.822	0.188187	0.852896	0.0670553	130.456	0.845073	0.984489	0.978346
Clozapine_yes_vs_no	Nicotinamide Riboside	9	14	-16.9158	44.7818	-0.755922	0.458107	-0.29504	-72.7749	0.462323	0.984489	0.978346
Clozapine_yes_vs_no	Octanoylcarnitine	11	30	178.856	-210.673	0.953418	0.354737	0.360337	261.915	0.494529	0.984489	0.978346
Clozapine_yes_vs_no	Aspartylglycosamine	10	29	55.239	-7.65283	0.619066	0.547441	0.273615	31.8616	0.720476	0.984489	0.978346
Clozapine_yes_vs_no	Dodecanoylcarnitine	9	26	42.0085	93.2816	-0.238881	0.812692	-0.0624005	151.817	0.674513	0.984489	0.978346
Clozapine_yes_vs_no	Myristoylcarnitine	11	30	39.5818	24.1134	0.0732032	0.942476	0.0261037	50.6465	0.812925	0.986273	0.978346
Clozapine_yes_vs_no	Zymosterol	11	30	-238.933	262.147	-0.958445	0.353069	-0.375165	-373.914	0.425643	0.984489	0.978346
Clozapine_yes_vs_no	Linoleylcarnitine	4	17	-202.209	370.606	-1.01581	0.32483	-0.268498	-272.109	0.846786	0.984489	0.978346
Clozapine_yes_vs_no	Vitamin K2	6	23	-61.58	42.2006	-1.30536	0.20782	-0.396976	-55.8261	0.649221	0.984489	0.978346
Clozapine_yes_vs_no	Histidine	11	30	-75.8657	-6.47063	-0.416809	0.681046	-0.135678	-114.654	0.536745	0.984489	0.978346
Clozapine_yes_vs_no	Tyrosine	11	30	-329.201	-729.853	0.406268	0.690284	0.158787	485.862	0.596694	0.984489	0.978346
Clozapine_yes_vs_no	Arginine	11	30	39.4597	-3.58112	0.224576	0.824295	0.070304	37.0181	0.869358	0.984489	0.978346
Clozapine_yes_vs_no	Methionine	11	30	-16.8182	-355.141	0.45723	0.653889	0.175621	321.198	0.642174	0.984489	0.978346
Clozapine_yes_vs_no	Glycine	11	30	80.0165	21.0341	0.190511	0.850703	0.0614875	113.184	0.754905	0.984489	0.978346
Clozapine_yes_vs_no	Nicotinic acid	11	30	-39.3307	-33.5641	-0.146319	0.885643	-0.0576862	-13.7513	0.707962	0.984489	0.978346
Clozapine_yes_vs_no	Pyruvic acid	11	30	-130.469	-142.834	0.0606793	0.952306	0.0216888	54.4899	0.769952	0.986273	0.978346
Clozapine_yes_vs_no	L-Lactic acid	11	29	585.826	132.851	0.520332	0.610093	0.199379	408.863	0.636217	0.984489	0.978346
Clozapine_yes_vs_no	Itaconic acid	11	30	-36.0712	15.1293	-0.677968	0.502447	-0.182067	-74.9866	0.488702	0.984489	0.978346
Clozapine_yes_vs_no	Citraconic acid	11	30	9.10911	6.32722	0.0247254	0.980505	0.00801439	20.0361	0.880082	0.986273	0.978346
Clozapine_yes_vs_no	Oxaloacetic acid	11	30	-15.8434	33.7807	-0.220782	0.828043	-0.0825965	-45.6964	0.837305	0.984489	0.978346
Clozapine_yes_vs_no	a-ketoglutarate.1	11	30	85.9932	-39.5841	1.00325	0.3266	0.319322	98.1094	0.515211	0.984489	0.978346
Clozapine_yes_vs_no	Mevalonic acid	7	21	-0.761034	-17.0933	0.307613	0.766718	0.171933	23.9985	0.54719	0.984489	0.978346
Clozapine_yes_vs_no	2-Hydroxyglutarate	11	30	114.411	-0.552662	1.16652	0.25691	0.385567	89.4062	0.431515	0.984489	0.978346
Clozapine_yes_vs_no	3-methylphenylacetic acid	11	30	-108.072	28.1993	-0.490795	0.628372	-0.155693	-175.861	0.593741	0.984489	0.978346
Clozapine_yes_vs_no	Orotic acid	11	29	-79.1875	15.1551	-0.539387	0.593766	-0.156302	-110.297	0.639179	0.984489	0.978346
Clozapine_yes_vs_no	Allantoin	4	12	-26.412	-13.8007	-0.218995	0.833952	-0.116871	-36.7779	0.588332	0.984489	0.978346
Clozapine_yes_vs_no	Quinolinic Acid	9	24	10.0021	6.38678	0.076412	0.939881	0.0261934	7.66487	0.898209	0.986273	0.978346
Clozapine_yes_vs_no	Ascorbic acid	11	30	-167.121	70.6463	-0.855396	0.401314	-0.269719	-244.371	0.467455	0.984489	0.978346
Clozapine_yes_vs_no	Azelaic acid	11	27	-749.372	1296.03	-1.68034	0.10413	-0.385915	-985.587	0.636873	0.984489	0.978346
Clozapine_yes_vs_no	p-Aminohippuric acid	11	29	-15.6866	-31.4461	0.0929593	0.927	0.0336344	50.4031	0.768531	0.986273	0.978346
Clozapine_yes_vs_no	Cinnamoylglycine	9	22	57.9341	-37.6254	0.749506	0.461773	0.255751	107.487	0.515262	0.984489	0.978346
Clozapine_yes_vs_no	Pantothenic acid	11	30	-16.7916	-78.7829	0.514433	0.613362	0.182915	97.2924	0.443536	0.984489	0.978346
Clozapine_yes_vs_no	Pseudouridine	11	30	38.8181	2.98869	0.664626	0.511917	0.194693	18.2822	0.79733	0.984489	0.978346
Clozapine_yes_vs_no	glucose-1-phosphate	11	30	-61.9513	70.061	-1.0541	0.299555	-0.285953	-102.905	0.562309	0.984489	0.978346
Clozapine_yes_vs_no	Hexose Disaccharide Pool	10	24	-124.109	11.8286	-0.4004	0.691523	-0.110587	109.453	0.827815	0.984489	0.978346
Clozapine_yes_vs_no	Orotidine monophosphate	9	15	-14.9927	1.24753	-0.378751	0.709286	-0.156499	-22.7212	0.680878	0.984489	0.978346
Clozapine_yes_vs_no	Plasmalogen(p16:0/20:4)	10	28	-309.076	-220.449	-0.931946	0.362551	-0.307965	-60.401	0.525649	0.984489	0.978346
Clozapine_yes_vs_no	PI(36:4)	9	23	30.0216	-13.5898	0.16577	0.872052	0.0935425	140.472	0.473655	0.984489	0.978346
Clozapine_yes_vs_no	PI(36:2)	5	22	-98.809	-48.5588	-0.648132	0.540571	-0.315381	-23.6918	0.794863	0.984489	0.978346
Clozapine_yes_vs_no	PI(36:1)	5	15	-60.4275	-39.1154	-0.344015	0.742895	-0.199168	-12.6059	0.858062	0.984489	0.978346
Clozapine_yes_vs_no	PI(38:5)	5	19	5.20629	-31.1938	0.286747	0.78653	0.200585	53.4766	0.579718	0.984489	0.978346
Clozapine_yes_vs_no	PI(38:3)	9	26	-75.0177	-105.407	0.177716	0.862876	0.0992434	58.2157	0.633016	0.984489	0.978346
Clozapine_yes_vs_no	L-Glutamine	11	30	49.1784	391.938	-0.0733937	0.94225	-0.0248923	-623.175	0.904253	0.986273	0.978654
Clozapine_yes_vs_no	Lysine	11	30	197.226	345.859	-0.0291729	0.977035	-0.0100202	-520.766	0.925529	0.986273	0.99538
Clozapine_yes_vs_no	Propionylcarnitine	11	30	-195.847	-138.988	-0.0775295	0.939305	-0.0319213	25.2378	0.967799	0.986273	0.996316
Clozapine_yes_vs_no	Glycerophosphocholine	11	30	683.021	943.275	-0.0846265	0.933573	-0.031101	-205.529	0.945725	0.986273	0.996316
Clozapine_yes_vs_no	Anandamide	11	30	49.7106	31.5997	0.144836	0.886616	0.0537077	-1.51313	0.99049	0.984489	0.996316
Clozapine_yes_vs_no	S-adenosyl-L-homoCysteine	11	30	52.7116	48.7007	0.0518855	0.959201	0.0183699	3.6987	0.960632	0.986273	0.996316
Clozapine_yes_vs_no	3-Hydroxy-cis-5-tetradecenoylcarnitine	8	28	-7.19024	40.5842	-0.593981	0.55725	-0.12737	9.5243	0.954666	0.984489	0.996316
Clozapine_yes_vs_no	L-Palmitoylcarnitine	5	18	-104.117	199.755	-1.05268	0.307136	-0.276147	-38.4354	0.951386	0.984489	0.996316
Clozapine_yes_vs_no	Oleoylcarnitine	6	20	-141.293	267.061	-1.03896	0.311843	-0.261203	30.5195	0.972138	0.984489	0.996316
Clozapine_yes_vs_no	Aspartic acid	11	30	20.8926	39.4013	-0.053879	0.957443	-0.0160264	6.36463	0.988099	0.986273	0.996316
Clozapine_yes_vs_no	Indole-3-carboxylic acid	11	30	28.149	5.81534	0.16067	0.874111	0.0558552	2.60681	0.986363	0.984489	0.996316
Clozapine_yes_vs_no	Suberic Acid	11	30	-208.598	219.528	-0.835223	0.409763	-0.181181	-34.7376	0.969097	0.984489	0.996316
Clozapine_yes_vs_no	PI(38:4)	10	30	-214.507	-238.012	0.0673345	0.947521	0.0321608	7.52714	0.978449	0.986273	0.996316
Clozapine_yes_vs_no	2-Arachidonylglycerol	6	20	-44.6868	41.5796	-0.56904	0.574858	-0.151714	0.522096	0.998716	0.984489	0.998716
Cpz_high_vs_low	Pyruvic acid	20	21	-395.665	104.435	-3.14468	0.00317729	-0.981956	-483.688	0.00183743	0.543316	0.314201
Cpz_high_vs_low	Urea	20	21	-351.8	34.0736	-1.74666	0.0902075	-0.538941	-372.166	0.100425	0.632255	0.633932
Cpz_high_vs_low	Sarcosine	20	21	-1882.24	835.368	-1.71778	0.095753	-0.529458	-2811.46	0.0959829	0.632255	0.633932
Cpz_high_vs_low	Alanine	20	21	-1862.73	850.038	-1.71918	0.0957718	-0.529454	-2785.81	0.0986748	0.632255	0.633932
Cpz_high_vs_low	Dimethylglycine	20	21	-729.942	-10.9895	-1.51652	0.141701	-0.464851	-649.746	0.162115	0.632255	0.633932
Cpz_high_vs_low	3-Aminoisobutyric acid	20	21	-87.1197	75.8088	-1.45046	0.155253	-0.450341	-171.931	0.148084	0.632255	0.633932
Cpz_high_vs_low	L-Serine	20	21	-525.428	623.087	-1.35012	0.185061	-0.419249	-1159.39	0.182414	0.632255	0.633932
Cpz_high_vs_low	Histamine	15	17	-24.5498	51.4708	-0.913758	0.368757	-0.327213	-79.5304	0.368501	0.632255	0.633932
Cpz_high_vs_low	L-Proline	20	21	-3444.57	1588.83	-1.5549	0.129791	-0.479662	-5435.03	0.114781	0.632255	0.633932
Cpz_high_vs_low	Guanidinoacetic acid	20	21	-3655.18	-198.316	-1.2633	0.215125	-0.390411	-3150.95	0.248883	0.632255	0.633932
Cpz_high_vs_low	L-Valine	20	21	-863.721	77.8838	-1.39211	0.173626	-0.429231	-870.748	0.201332	0.632255	0.633932
Cpz_high_vs_low	Threonine	20	21	-1203.2	-64.9161	-0.889129	0.379564	-0.276203	-1103.07	0.396671	0.632255	0.633932
Cpz_high_vs_low	N-acetyl-L-alanine	20	21	-2810.95	-253.478	-1.68253	0.101739	-0.519856	-2638.81	0.0942369	0.632255	0.633932
Cpz_high_vs_low	Creatine	20	21	-2984.68	-320.112	-1.67428	0.103376	-0.517279	-2732.85	0.096889	0.632255	0.633932
Cpz_high_vs_low	L-leucine + L-Isoleucine	20	21	-4783.84	1586.7	-1.75857	0.0890669	-0.541084	-6133.16	0.0972713	0.632255	0.633932
Cpz_high_vs_low	Ornithine	20	21	34.9009	-81.5293	0.993171	0.326757	0.309648	111.861	0.335903	0.632255	0.633932
Cpz_high_vs_low	Homocysteine	20	21	-125.604	80.5802	-1.92679	0.0621593	-0.596234	-236.589	0.038279	0.632255	0.633932
Cpz_high_vs_low	Adenine	20	21	-161.925	19.2989	-1.46428	0.151425	-0.454757	-185.729	0.15902	0.632255	0.633932
Cpz_high_vs_low	1-Methylnicotinamide	20	21	334.086	57.2193	0.837878	0.411363	0.267589	284.803	0.385698	0.639482	0.633932
Cpz_high_vs_low	O-Phosphoethanolamine	17	20	-10.6507	48.8277	-1.22961	0.227081	-0.402261	-67.1375	0.198655	0.632255	0.633932
Cpz_high_vs_low	Acetylcholine	20	21	-68.0903	334.229	-0.938215	0.353952	-0.292134	-350.066	0.392785	0.632255	0.633932
Cpz_high_vs_low	L-Glutamine	20	21	-1848.25	2345.91	-0.991156	0.327809	-0.308354	-4369.79	0.321869	0.632255	0.633932
Cpz_high_vs_low	L-Lysine	20	21	-2178.74	2694.2	-1.06702	0.292665	-0.331742	-5127.41	0.284668	0.632255	0.633932
Cpz_high_vs_low	L-Glutamic acid	20	21	-233.851	288.113	-0.84326	0.404451	-0.261772	-548.336	0.394656	0.639482	0.633932
Cpz_high_vs_low	L-Methionine	20	21	-939.124	257.996	-1.56083	0.128273	-0.481673	-1210.74	0.121152	0.632255	0.633932
Cpz_high_vs_low	DL-2-Aminooctanoic acid	20	21	-236.901	260.292	-1.85781	0.0723832	-0.573147	-506.598	0.0708477	0.632255	0.633932
Cpz_high_vs_low	L-Carnitine	20	21	-2082.84	692.331	-1.58422	0.121852	-0.490934	-2465.48	0.158248	0.632255	0.633932
Cpz_high_vs_low	7-methylguanine	20	21	-98.0853	135.803	-1.67587	0.102051	-0.520494	-227.125	0.122885	0.632255	0.633932
Cpz_high_vs_low	Methionine sulfoxide	20	21	-232.629	-1.13921	-2.12714	0.0415963	-0.655217	-239.188	0.040645	0.632255	0.633932
Cpz_high_vs_low	1-Methylhistidine	20	21	-141.906	118.973	-1.1653	0.251955	-0.360289	-212.273	0.359109	0.632255	0.633932
Cpz_high_vs_low	Serotonin	20	21	-151.358	73.8377	-0.852998	0.39911	-0.264756	-235.686	0.379418	0.639482	0.633932
Cpz_high_vs_low	L-Tyrosine	20	21	-1032.09	85.3523	-1.76986	0.0860974	-0.546289	-1116.5	0.0913499	0.632255	0.633932
Cpz_high_vs_low	Normetanephrine	20	21	29.6826	-170.625	0.758692	0.452753	0.237851	249.242	0.365767	0.666472	0.633932
Cpz_high_vs_low	Acetyllysine	20	21	-295.978	40.5905	-1.43535	0.159194	-0.447158	-296.983	0.195945	0.632255	0.633932
Cpz_high_vs_low	N-acetyl-glutamate	20	21	-935.304	1015	-1.24436	0.22102	-0.386615	-1945.48	0.233108	0.632255	0.633932
Cpz_high_vs_low	5-Hydroxyindoleacetic acid	20	21	-22.7066	-101.668	0.646559	0.52172	0.202084	106.308	0.377455	0.696241	0.633932
Cpz_high_vs_low	Dimethyl-L-arginine	20	21	-111.08	198.859	-2.78531	0.00821753	-0.868221	-311.298	0.0117952	0.632255	0.633932
Cpz_high_vs_low	L-Acetylcarnitine	20	21	-1095.42	544.971	-1.01194	0.318075	-0.314145	-1494.33	0.359673	0.632255	0.633932
Cpz_high_vs_low	L-Tryptophan	20	21	-1826.12	-553.546	-1.04926	0.300833	-0.325623	-1136.27	0.339391	0.632255	0.633932
Cpz_high_vs_low	Propionylcarnitine	20	21	-775.604	437.529	-2.35884	0.0248845	-0.726694	-1135.16	0.0336085	0.632255	0.633932
Cpz_high_vs_low	Butyrylcarnitine	20	21	-598.268	99.8746	-1.46567	0.156006	-0.448352	-815.118	0.0944298	0.632255	0.633932
Cpz_high_vs_low	Cystine	20	21	-235.062	254.918	-0.942276	0.35187	-0.293626	-501.909	0.352218	0.632255	0.633932
Cpz_high_vs_low	Tiglylcarnitine	20	21	-171.412	249.922	-0.970888	0.337624	-0.302371	-400.659	0.369202	0.632255	0.633932
Cpz_high_vs_low	3-Hydroxyisovaleryl carnitine	20	21	-155.866	79.9712	-1.52488	0.137321	-0.470069	-205.195	0.173834	0.632255	0.633932
Cpz_high_vs_low	3-Hydroxyhexanoylcarnitine	20	21	-48.9611	124.306	-1.40981	0.168112	-0.435076	-190.098	0.152226	0.632255	0.633932
Cpz_high_vs_low	L-Glutarylcarnitine	20	21	-78.9921	163.219	-1.15991	0.253771	-0.359261	-264.08	0.239741	0.632255	0.633932
Cpz_high_vs_low	1-Methyladenosine	20	21	-88.8168	117.325	-1.92135	0.062421	-0.596088	-185.051	0.0997205	0.632255	0.633932
Cpz_high_vs_low	2-Octenoylcarnitine	20	21	-318.994	-157.206	-0.987845	0.330952	-0.304331	-158.927	0.377036	0.632255	0.633932
Cpz_high_vs_low	Adipoylcarnitine	19	21	-94.5887	107.589	-0.9183	0.368184	-0.277774	-228.964	0.34946	0.632255	0.633932
Cpz_high_vs_low	7-Methylguanosine	20	21	0.807129	101.542	-1.16128	0.252694	-0.361272	-94.896	0.3018	0.632255	0.633932
Cpz_high_vs_low	5-Methylthioadenosine	20	21	-227.65	-156.354	-1.31026	0.199064	-0.404725	-65.1513	0.237133	0.632255	0.633932
Cpz_high_vs_low	Suberylcarnitine	19	20	-111.397	298.566	-1.06464	0.300318	-0.33225	-439.188	0.291094	0.632255	0.633932
Cpz_high_vs_low	Anandamide	20	21	-18.479	88.7803	-1.04272	0.30445	-0.322289	-110.905	0.301689	0.632255	0.633932
Cpz_high_vs_low	3-Hydroxydodecanoylcarnitine	17	21	-71.6812	75.8062	-1.83207	0.0758552	-0.568033	-142.571	0.111529	0.632255	0.633932
Cpz_high_vs_low	3-Hydroxy-cis-5-tetradecenoylcarnitine	17	19	-39.4957	92.119	-1.12919	0.273517	-0.356192	-147.641	0.254648	0.632255	0.633932
Cpz_high_vs_low	24,25-Dihydrolanosterol	20	21	309.783	-271.923	1.70648	0.0974835	0.5386	542.379	0.135441	0.632255	0.633932
Cpz_high_vs_low	PC(16:0/18:2)	20	21	-501.506	-703.091	0.705902	0.484731	0.221732	348.415	0.191626	0.673895	0.633932
Cpz_high_vs_low	BMP(18:1/16:0)	8	9	26.14	-56.4733	1.20584	0.255731	0.608737	79.4555	0.280176	0.632255	0.633932
Cpz_high_vs_low	N-acetyl spermine	20	21	-250.653	499.659	-1.35408	0.183836	-0.420379	-723.004	0.20318	0.632255	0.633932
Cpz_high_vs_low	Aspartylglycosamine	19	20	-44.5951	58.8883	-1.44705	0.157158	-0.459096	-108.488	0.143299	0.632255	0.633932
Cpz_high_vs_low	Dodecanoylcarnitine	16	19	-111.552	241.486	-1.40343	0.175445	-0.440308	-382.003	0.189903	0.632255	0.633932
Cpz_high_vs_low	Cholesterol	15	17	-104.788	-221.122	0.88058	0.388227	0.32239	133.172	0.305192	0.632255	0.633932
Cpz_high_vs_low	2-Arachidonylglycerol	12	14	-122.709	145.427	-1.32603	0.205344	-0.485204	-311.063	0.207037	0.632255	0.633932
Cpz_high_vs_low	L-Palmitoylcarnitine	13	10	-90.3275	424.926	-0.992	0.347094	-0.479099	-543.965	0.276806	0.632255	0.633932
Cpz_high_vs_low	Linoleylcarnitine	12	9	-191.99	866.15	-0.992861	0.349853	-0.510027	-1056.41	0.301863	0.632255	0.633932
Cpz_high_vs_low	Oleoylcarnitine	13	13	-124.976	470.627	-0.98428	0.344397	-0.386066	-688.344	0.304622	0.632255	0.633932
Cpz_high_vs_low	Leucine+isoleucine	20	21	-5134.13	1668.5	-1.83256	0.0768688	-0.564095	-6638.41	0.0802856	0.632255	0.633932
Cpz_high_vs_low	Tyrosine	20	21	-1351.94	72.4738	-1.90603	0.0656015	-0.588079	-1437.18	0.0681673	0.632255	0.633932
Cpz_high_vs_low	Arginine	20	21	-127.475	136.958	-1.42459	0.162453	-0.442684	-296.263	0.125324	0.632255	0.633932
Cpz_high_vs_low	Methionine	20	21	-751.036	199.119	-1.64779	0.109332	-0.50805	-969.473	0.100236	0.632255	0.633932
Cpz_high_vs_low	Lysine	20	21	-2282.77	2771.46	-1.11388	0.272365	-0.346049	-5233.62	0.269602	0.632255	0.633932
Cpz_high_vs_low	Riboflavin	20	21	-60.2013	15.2186	-0.835262	0.408964	-0.259056	-84.0598	0.39226	0.639482	0.633932
Cpz_high_vs_low	Aspartic acid	20	21	-222.67	279.298	-1.44527	0.158095	-0.445837	-524.01	0.152851	0.632255	0.633932
Cpz_high_vs_low	Glutamic acid	20	21	-196.994	438.804	-1.71515	0.0969918	-0.527528	-631.097	0.100122	0.632255	0.633932
Cpz_high_vs_low	Glycine	20	21	-185.158	248.303	-1.50153	0.142356	-0.464309	-461.888	0.135204	0.632255	0.633932
Cpz_high_vs_low	Asparagine	20	21	-520.602	-191.317	-1.31015	0.198462	-0.405877	-328.902	0.207547	0.632255	0.633932
Cpz_high_vs_low	Glyceric acid	20	21	-33.6	23.0314	-1.55981	0.127711	-0.482886	-68.238	0.0720753	0.632255	0.633932
Cpz_high_vs_low	Guanidoacetic acid	12	17	8.38614	-1.84997	0.297338	0.768623	0.10983	35.6957	0.292234	0.845711	0.633932
Cpz_high_vs_low	Pyroglutamic acid	19	20	-11.5618	30.8116	-1.08204	0.286246	-0.346516	-50.3573	0.212171	0.632255	0.633932
Cpz_high_vs_low	Citraconic acid	20	21	-53.7791	65.0285	-1.11773	0.270635	-0.347664	-109.456	0.334986	0.632255	0.633932
Cpz_high_vs_low	Ketoleucine	20	21	-57.0643	65.6765	-1.21124	0.233542	-0.375636	-110.403	0.304986	0.632255	0.633932
Cpz_high_vs_low	Oxaloacetic acid	20	21	-125.613	159.591	-1.5871	0.122671	-0.489045	-270.206	0.153621	0.632255	0.633932
Cpz_high_vs_low	Hypoxanthine	20	21	417.643	8.47839	1.15012	0.262754	0.367282	327.13	0.342793	0.632255	0.633932
Cpz_high_vs_low	a-ketoglutarate	20	21	-28.9532	124.783	-0.813595	0.420898	-0.2547	-193.516	0.317702	0.64262	0.633932
Cpz_high_vs_low	Phenylpropiolic acid	20	21	-123.646	163.28	-1.0274	0.310647	-0.321524	-342.118	0.230554	0.632255	0.633932
Cpz_high_vs_low	Mevalonic acid	15	13	-53.2002	33.3628	-2.63189	0.0160897	-1.02947	-83.1532	0.0127903	0.632255	0.633932
Cpz_high_vs_low	2-Hydroxyglutarate	20	21	-14.5523	72.9991	-0.930323	0.358418	-0.29246	-90.642	0.346668	0.632255	0.633932
Cpz_high_vs_low	3-methylphenylacetic acid	20	21	-172.089	147.569	-1.19325	0.240176	-0.370825	-327.837	0.245013	0.632255	0.633932
Cpz_high_vs_low	Xanthine	20	21	57.9231	156.697	-0.73364	0.467855	-0.22745	-133.687	0.345502	0.666693	0.633932
Cpz_high_vs_low	Orotic acid	20	20	-100.421	78.8431	-0.947796	0.349577	-0.29972	-192.103	0.33958	0.632255	0.633932
Cpz_high_vs_low	Allantoin	7	9	-47.9217	7.13278	-1.04763	0.313994	-0.529131	-58.4874	0.289022	0.632255	0.633932
Cpz_high_vs_low	Indole-3-carboxylic acid	20	21	-54.7666	75.211	-1.06326	0.294683	-0.329564	-125.637	0.329302	0.632255	0.633932
Cpz_high_vs_low	Homogentisic acid	20	21	-337.875	227.803	-1.77053	0.0847231	-0.549958	-544.513	0.0911301	0.632255	0.633932
Cpz_high_vs_low	Uric acid	20	21	-2614.06	1663.65	-1.66224	0.104751	-0.51635	-3996.36	0.119023	0.632255	0.633932
Cpz_high_vs_low	Suberic Acid	20	21	-342.371	530.413	-1.22928	0.232838	-0.374846	-965.865	0.203349	0.632255	0.633932
Cpz_high_vs_low	Ascorbic acid	20	21	-161.62	167.308	-1.21579	0.231761	-0.37722	-324.299	0.260706	0.632255	0.633932
Cpz_high_vs_low	Indoleacrylic acid	20	21	-62.4283	-15.3301	-0.89922	0.374374	-0.278926	-56.6367	0.305355	0.632255	0.633932
Cpz_high_vs_low	Azelaic acid	17	21	-736.52	1870.03	-1.70381	0.103659	-0.499537	-2843.47	0.109665	0.632255	0.633932
Cpz_high_vs_low	p-Aminohippuric acid	20	20	-106.007	51.7822	-1.08104	0.287326	-0.341856	-149.905	0.304587	0.632255	0.633932
Cpz_high_vs_low	Pantothenic acid	20	21	-153.456	24.8056	-1.75005	0.0881316	-0.544187	-177.944	0.0936866	0.632255	0.633932
Cpz_high_vs_low	Uridine	20	21	-41.9733	63.0983	-1.82889	0.0753407	-0.573392	-112.078	0.0736307	0.632255	0.633932
Cpz_high_vs_low	Pseudouridine	20	21	-24.5177	47.9531	-1.27893	0.208616	-0.400442	-70.0928	0.239608	0.632255	0.633932
Cpz_high_vs_low	glucose-1-phosphate	20	21	-47.156	112.547	-1.11518	0.27162	-0.34848	-170.683	0.253384	0.632255	0.633932
Cpz_high_vs_low	11,12-DiHETrE	20	21	-200.636	164.26	-1.39831	0.170422	-0.433618	-321.975	0.20253	0.632255	0.633932
Cpz_high_vs_low	Plasmalogen(p16:0/20:4)	19	19	-225.728	-261.815	0.383577	0.703549	0.124449	106.187	0.181654	0.819714	0.633932
Cpz_high_vs_low	PI(40:5)	11	12	-41.1943	16.6083	-1.11974	0.278702	-0.455103	-47.2061	0.364479	0.632255	0.633932
Cpz_high_vs_low	Gluconolactone	20	20	-30.201	17.4924	-1.05721	0.297243	-0.334318	-49.1394	0.300825	0.632255	0.633932
Cpz_high_vs_low	Citrulline	20	21	-802.886	381.417	-0.842294	0.404917	-0.261693	-1187.59	0.40376	0.639482	0.63893
Cpz_high_vs_low	Hexanoylcarnitine	20	21	-70.8022	273.884	-0.924051	0.36124	-0.287409	-330.292	0.407271	0.632255	0.63893
Cpz_high_vs_low	Methylcysteine	20	21	-161.227	386.334	-0.822302	0.415909	-0.256408	-559.577	0.414223	0.640724	0.643929
Cpz_high_vs_low	Inosine	18	20	156.36	-8.41725	1.01049	0.323114	0.341042	128.257	0.421499	0.632255	0.649336
Cpz_high_vs_low	Malonylcarnitine	20	21	-91.6389	24.7298	-0.893129	0.377974	-0.276225	-105.873	0.433856	0.632255	0.662405
Cpz_high_vs_low	L-Kynurenine	20	21	-210.117	-29.9528	-0.99393	0.326385	-0.310249	-140.977	0.439197	0.632255	0.664625
Cpz_high_vs_low	Pipecolic acid	20	21	-965.873	1410.13	-0.714211	0.47935	-0.222818	-2509.87	0.466557	0.673895	0.686067
Cpz_high_vs_low	Dodecenoylcarnitine	17	21	-35.0459	48.4222	-0.641869	0.525112	-0.201564	-98.4554	0.465578	0.696241	0.686067
Cpz_high_vs_low	Malonic acid	20	18	-164.986	65.4078	-0.628975	0.533424	-0.204802	-268.39	0.46101	0.701658	0.686067
Cpz_high_vs_low	PI(38:4)	19	21	-183.283	-276.336	0.406414	0.686728	0.127582	165.809	0.469414	0.815489	0.686067
Cpz_high_vs_low	Xanthosine	20	21	-9.98	126.157	-0.879088	0.385013	-0.272779	-104.992	0.479274	0.632255	0.69454
Cpz_high_vs_low	S-adenosyl-L-homoCysteine	20	21	19.399	78.708	-0.88281	0.382911	-0.274293	-43.97	0.494866	0.632255	0.711109
Cpz_high_vs_low	Methylguanidine	20	20	-67.8793	-229.383	0.742402	0.462682	0.234768	149.594	0.521259	0.666472	0.716565
Cpz_high_vs_low	Trimethylamine-N-oxide	20	21	-36.6515	64.9307	-1.08922	0.283929	-0.336356	-55.3614	0.526796	0.632255	0.716565
Cpz_high_vs_low	Indole	20	21	-282.602	-141.613	-0.744678	0.461071	-0.23135	-115.17	0.534819	0.666472	0.716565
Cpz_high_vs_low	L-Phenylalanine	20	21	-776.221	-154.215	-0.707427	0.484031	-0.218828	-559.172	0.544318	0.673895	0.716565
Cpz_high_vs_low	N-Acetylornithine	20	21	-28.0901	172.925	-0.768541	0.446867	-0.239081	-171.401	0.520502	0.666472	0.716565
Cpz_high_vs_low	N-acetyl-glutamine	20	21	-86.5904	137.346	-0.698171	0.489243	-0.218335	-187.315	0.54703	0.674682	0.716565
Cpz_high_vs_low	Zymosterol	20	21	-60.6353	307.088	-0.874884	0.387121	-0.27407	-239.979	0.548111	0.632255	0.716565
Cpz_high_vs_low	Histidine	20	21	-79.5829	26.8103	-0.667761	0.508245	-0.208806	-99.9596	0.527574	0.689761	0.716565
Cpz_high_vs_low	Tryptophan	20	21	-376.198	-198.174	-0.75346	0.455894	-0.233903	-151.89	0.514074	0.666472	0.716565
Cpz_high_vs_low	Nicotinic acid	20	21	-45.9784	-24.7616	-0.687783	0.495861	-0.213438	-19.2116	0.540663	0.678338	0.716565
Cpz_high_vs_low	PI(36:2)	14	13	-44.0174	-72.7764	0.468892	0.643215	0.179831	36.3638	0.548947	0.785641	0.716565
Cpz_high_vs_low	PI(38:5)	13	11	-43.4503	-0.163279	-0.593349	0.558999	-0.239517	-44.4635	0.548523	0.713349	0.716565
Cpz_high_vs_low	Creatinine	20	21	-146.244	288.205	-0.761754	0.452045	-0.234648	-344.495	0.557102	0.666472	0.721701
Cpz_high_vs_low	Hexose Disaccharide Pool	15	19	-187.077	97.3136	-0.745642	0.463802	-0.232678	-254.157	0.563118	0.666472	0.724009
Cpz_high_vs_low	Betaine	19	20	-59.3965	0.251126	-0.516877	0.608329	-0.165093	-68.3595	0.570222	0.7538	0.727672
Cpz_high_vs_low	N-carbamoyl-L-aspartate	20	21	-44.0276	-4.7139	-0.371828	0.712036	-0.115938	-58.0212	0.578364	0.82269	0.732507
Cpz_high_vs_low	Orotidine monophosphate	11	13	8.17915	-15.8609	0.548341	0.5907	0.232627	25.3323	0.582579	0.739079	0.732507
Cpz_high_vs_low	Hydroxyproline	20	21	-309.307	-109.32	-0.60847	0.546411	-0.189653	-182.778	0.588551	0.711991	0.734615
Cpz_high_vs_low	a-ketoglutarate.1	20	21	-30.4895	17.5329	-0.386028	0.701662	-0.12108	-68.4048	0.593711	0.819714	0.735685
Cpz_high_vs_low	Homoarginine	20	21	-214.49	-111.278	-0.597326	0.553771	-0.185971	-92.027	0.600349	0.711991	0.738559
Cpz_high_vs_low	beta-Alanine	20	21	-39.1019	143.391	-0.600874	0.551419	-0.187162	-155.441	0.618242	0.711991	0.747747
Cpz_high_vs_low	Cytidine monophosphate	16	20	26.7745	16.405	0.269277	0.789672	0.0926912	17.2458	0.620936	0.860089	0.747747
Cpz_high_vs_low	Ceramide(d18:1/12:0)	20	19	-11.9776	3.12946	-0.342936	0.73367	-0.109118	-23.0157	0.618861	0.827454	0.747747
Cpz_high_vs_low	Isovalerylcarnitine	20	21	-259.476	-32.9141	-0.540401	0.592127	-0.169519	-178.098	0.675839	0.739079	0.808171
Cpz_high_vs_low	2-Keto-L-gluconate	13	17	116.656	-16.0207	0.652816	0.525234	0.272486	76.5811	0.685	0.696241	0.813437
Cpz_high_vs_low	Cinnamoylglycine	14	17	-70.2078	39.7974	-0.883626	0.386847	-0.295679	-55.6283	0.698722	0.632255	0.820788
Cpz_high_vs_low	PI(36:1)	11	9	-46.0345	-42.4988	-0.0720495	0.94346	-0.0329108	21.4346	0.700789	0.9503	0.820788
Cpz_high_vs_low	Glycerophosphocholine	20	21	290.239	1428.89	-0.434606	0.666366	-0.13639	-931.017	0.718681	0.796843	0.823554
Cpz_high_vs_low	Itaconic acid	20	21	-18.889	20.7084	-0.452461	0.653495	-0.140692	-32.7068	0.722283	0.79009	0.823554
Cpz_high_vs_low	Xanthurenic acid	18	19	-42.1792	-24.921	-0.164544	0.870252	-0.0541136	-34.7962	0.712158	0.918599	0.823554
Cpz_high_vs_low	PI(36:4)	16	16	-31.2242	28.5759	-0.363245	0.719551	-0.128427	-59.2918	0.722416	0.825793	0.823554
Cpz_high_vs_low	Taurine	20	21	360.075	421.493	-0.0698181	0.944742	-0.0219879	-297.662	0.741085	0.9503	0.839242
Cpz_high_vs_low	Saccharopine	16	19	-17.0111	-36.3097	0.382819	0.704666	0.132322	15.8831	0.751619	0.819714	0.845572
Cpz_high_vs_low	Nicotinamide Riboside	10	13	30.5523	13.0139	0.189114	0.85241	0.0830096	33.6884	0.76428	0.905355	0.854196
Cpz_high_vs_low	Octanoylcarnitine	20	21	-141.227	-72.7721	-0.199225	0.843176	-0.0625257	88.0202	0.794616	0.901144	0.876641
Cpz_high_vs_low	L-Threonine	20	21	-195.923	-176.608	-0.0941769	0.925461	-0.0294937	-54.1691	0.792451	0.947627	0.876641
Cpz_high_vs_low	Eicosapentaenoic acid	20	20	2.27875	-49.8584	0.449555	0.656098	0.142162	30.4072	0.805158	0.79009	0.876956
Cpz_high_vs_low	PI(38:3)	17	18	-85.1117	-109.379	0.237158	0.814187	0.0792398	25.0967	0.801709	0.875635	0.876956
Cpz_high_vs_low	Hypotaurine	20	21	-98.6901	-77.1403	-0.13723	0.891562	-0.042719	-33.1603	0.825977	0.923982	0.883947
Cpz_high_vs_low	Purine	20	21	-102.364	-72.7373	-0.340223	0.735515	-0.106209	-18.7282	0.837423	0.827454	0.883947
Cpz_high_vs_low	Decanoylcarnitine	20	21	21.4353	46.4092	-0.0567354	0.955202	-0.0180388	88.5205	0.834729	0.955202	0.883947
Cpz_high_vs_low	Vitamin K2	14	15	-2.60877	42.5105	-0.471208	0.642739	-0.170905	-21.3539	0.81961	0.785641	0.883947
Cpz_high_vs_low	Quinolinic Acid	15	18	-1.42396	14.7034	-0.349286	0.729422	-0.117046	-10.7831	0.836936	0.827454	0.883947
Cpz_high_vs_low	L-Histidine	20	21	-171.825	-94.2242	-0.140524	0.889006	-0.0436066	-102.873	0.853091	0.923982	0.88842
Cpz_high_vs_low	Phosphorylcholine	17	15	-652.938	-459.705	-0.5765	0.568585	-0.202006	-53.8666	0.856657	0.720208	0.88842
Cpz_high_vs_low	L-Lactic acid	20	20	152.042	362.797	-0.29246	0.771526	-0.0924839	-133.227	0.857248	0.845711	0.88842
Cpz_high_vs_low	Dephospho-CoA	20	21	0.594267	12.4617	-0.295881	0.768898	-0.092483	-6.26435	0.878039	0.845711	0.89907
Cpz_high_vs_low	Hydroxykynurenine	20	21	-23.9342	-37.4652	0.0967421	0.923427	0.0301647	23.6497	0.872895	0.947627	0.89907
Cpz_high_vs_low	9-Decenoylcarnitine	20	21	-241.569	-73.3251	-0.305028	0.76229	-0.0962657	-68.4517	0.903338	0.845711	0.919469
Cpz_high_vs_low	Pimelylcarnitine	19	21	-52.0012	-0.782152	-0.155253	0.877453	-0.0491675	-19.2885	0.953913	0.920518	0.965202
Cpz_high_vs_low	Agmatine	16	18	0.596252	10.3045	-0.0791425	0.93743	-0.0266909	6.30834	0.96342	0.9503	0.969087
Cpz_high_vs_low	Myristoylcarnitine	20	21	51.8916	5.76048	0.250445	0.803579	0.0779048	-4.20653	0.981642	0.869696	0.981642
MADRS_severe_vs_mild	Urea	23	18	-72.9556	-257.916	0.782274	0.439544	0.251028	240.909	0.289586	0.893882	0.743412
MADRS_severe_vs_mild	Methylguanidine	23	17	-281.872	31.6358	-1.43241	0.161526	-0.464863	-294.774	0.213713	0.893882	0.743412
MADRS_severe_vs_mild	Trimethylamine-N-oxide	23	18	84.6839	-73.1786	1.78623	0.0820931	0.533773	130.606	0.132237	0.893882	0.743412
MADRS_severe_vs_mild	beta-Alanine	23	18	219.171	-156.209	1.26455	0.213619	0.390727	434.864	0.162064	0.893882	0.743412
MADRS_severe_vs_mild	Dimethylglycine	23	18	-35.6258	-778.346	1.65227	0.107912	0.480928	856.403	0.0658765	0.893882	0.743412
MADRS_severe_vs_mild	L-Serine	23	18	454.099	-437.112	1.03094	0.309174	0.322313	1115.32	0.20302	0.893882	0.743412
MADRS_severe_vs_mild	Hypotaurine	23	18	-157.479	1.57113	-1.03889	0.305276	-0.31935	-177.937	0.235419	0.893882	0.743412
MADRS_severe_vs_mild	Histamine	17	15	95.3843	-74.3184	2.2773	0.0319777	0.775703	181.645	0.0354585	0.893882	0.743412
MADRS_severe_vs_mild	Guanidinoacetic acid	23	18	-1112.13	-2871.63	0.606281	0.548559	0.195817	2362.28	0.390759	0.925113	0.743412
MADRS_severe_vs_mild	Threonine	23	18	266.797	-1753.53	1.64877	0.10724	0.50091	2325.03	0.072001	0.893882	0.743412
MADRS_severe_vs_mild	Pipecolic acid	23	18	2016.28	-2004.4	1.21704	0.231265	0.381614	4790.11	0.163582	0.893882	0.743412
MADRS_severe_vs_mild	N-acetyl-L-alanine	23	18	-924.306	-2237.95	0.879113	0.385095	0.260275	1234.88	0.445417	0.893882	0.743412
MADRS_severe_vs_mild	Creatine	23	18	-1035.41	-2366.75	0.84591	0.402995	0.251871	1222.64	0.469524	0.893882	0.743412
MADRS_severe_vs_mild	Hydroxyproline	23	18	-98.4086	-345.47	0.740961	0.463576	0.234855	331.661	0.32959	0.893882	0.743412
MADRS_severe_vs_mild	Methylcysteine	23	18	352.246	-178.51	0.792862	0.432878	0.248381	717.216	0.300312	0.893882	0.743412
MADRS_severe_vs_mild	Homocysteine	23	18	-73.7442	48.6785	-1.06097	0.296696	-0.3437	-137.768	0.242847	0.893882	0.743412
MADRS_severe_vs_mild	1-Methylnicotinamide	23	18	337.809	6.318	1.14387	0.263537	0.321634	375.015	0.260394	0.893882	0.743412
MADRS_severe_vs_mild	O-Phosphoethanolamine	19	18	44.5865	-2.86949	0.964344	0.341769	0.318528	53.8391	0.294622	0.893882	0.743412
MADRS_severe_vs_mild	Acetylcholine	23	18	299.103	-67.91	0.876413	0.386184	0.265963	498.39	0.227776	0.893882	0.743412
MADRS_severe_vs_mild	L-Glutamine	23	18	1792.28	-1606.85	0.781965	0.439496	0.248811	4203.59	0.343821	0.893882	0.743412
MADRS_severe_vs_mild	L-Lysine	23	18	1753.96	-1518.76	0.69534	0.491415	0.221034	4056.35	0.401433	0.893882	0.743412
MADRS_severe_vs_mild	L-Methionine	23	18	-47.409	-681.897	0.799059	0.42929	0.249847	805.376	0.306294	0.893882	0.743412
MADRS_severe_vs_mild	L-Histidine	23	18	-510.771	351.807	-1.57366	0.124511	-0.50003	-1065.85	0.0511605	0.893882	0.743412
MADRS_severe_vs_mild	DL-2-Aminooctanoic acid	23	18	123.423	-117.255	0.838038	0.407916	0.268675	268.039	0.336704	0.893882	0.743412
MADRS_severe_vs_mild	7-methylguanine	23	18	72.3843	-43.0375	0.790095	0.434681	0.250183	134.304	0.366058	0.893882	0.743412
MADRS_severe_vs_mild	N-Acetylornithine	23	18	213.629	-102.435	1.21869	0.230514	0.380039	361.499	0.16991	0.893882	0.743412
MADRS_severe_vs_mild	Citrulline	23	18	307.246	-839.701	0.785412	0.437875	0.253267	1633.57	0.251894	0.893882	0.743412
MADRS_severe_vs_mild	Serotonin	23	18	66.8286	-167.423	0.852677	0.40013	0.275573	326.803	0.222714	0.893882	0.743412
MADRS_severe_vs_mild	Normetanephrine	23	18	-239.081	139.411	-1.49597	0.142717	-0.458087	-441.504	0.0946178	0.893882	0.743412
MADRS_severe_vs_mild	Acetyllysine	23	18	-1.0534	-280.163	1.22455	0.228231	0.367721	343.233	0.133871	0.893882	0.743412
MADRS_severe_vs_mild	N-acetyl-glutamate	23	18	720.989	-776.32	0.944062	0.351136	0.294404	1688.09	0.305285	0.893882	0.743412
MADRS_severe_vs_mild	5-Hydroxyindoleacetic acid	23	18	-136.34	30.3698	-1.33781	0.190609	-0.434642	-146.877	0.229865	0.893882	0.743412
MADRS_severe_vs_mild	Dimethyl-L-arginine	23	18	-17.4732	130.908	-1.23366	0.225093	-0.38705	-148.766	0.242567	0.893882	0.743412
MADRS_severe_vs_mild	L-Tryptophan	23	18	-899.478	-1525.49	0.491446	0.626404	0.158511	882.827	0.460899	0.949973	0.743412
MADRS_severe_vs_mild	L-Kynurenine	23	18	-61.776	-189.472	0.68448	0.498254	0.218507	154.072	0.40554	0.893882	0.743412
MADRS_severe_vs_mild	Butyrylcarnitine	23	18	-640.23	269.85	-1.71011	0.102741	-0.595163	-1016.76	0.0311155	0.893882	0.743412
MADRS_severe_vs_mild	Cystine	23	18	177.379	-190.427	0.690201	0.494593	0.219311	465.054	0.392546	0.893882	0.743412
MADRS_severe_vs_mild	Tiglylcarnitine	23	18	255.58	-225.457	1.11692	0.270985	0.346405	579.981	0.190191	0.893882	0.743412
MADRS_severe_vs_mild	Isovalerylcarnitine	23	18	28.0612	-362.563	0.959234	0.343365	0.294426	442.029	0.292623	0.893882	0.743412
MADRS_severe_vs_mild	Malonylcarnitine	23	18	7.09739	-82.0385	0.6878	0.495654	0.210693	132.203	0.336068	0.893882	0.743412
MADRS_severe_vs_mild	Glycerophosphocholine	23	18	2625.39	-1365.14	1.62479	0.112307	0.491518	4896.73	0.0532968	0.893882	0.743412
MADRS_severe_vs_mild	3-Hydroxyisovaleryl carnitine	23	18	13.1847	-96.7319	0.738244	0.465658	0.214253	145.086	0.343565	0.893882	0.743412
MADRS_severe_vs_mild	3-Hydroxyhexanoylcarnitine	23	18	1.18805	89.104	-0.655377	0.517583	-0.216774	-110.443	0.40927	0.903129	0.743412
MADRS_severe_vs_mild	Saccharopine	19	16	2.32765	-62.8929	1.36365	0.181951	0.458329	69.5862	0.167517	0.893882	0.743412
MADRS_severe_vs_mild	7-Methylguanosine	23	18	97.0122	-4.59775	1.18827	0.241925	0.364429	118.447	0.193255	0.893882	0.743412
MADRS_severe_vs_mild	5-Methylthioadenosine	23	18	-176.369	-209.997	0.600448	0.551822	0.18777	46.6293	0.396333	0.925113	0.743412
MADRS_severe_vs_mild	Suberylcarnitine	21	18	-102.371	333.588	-1.01829	0.322762	-0.353962	-483.004	0.244236	0.893882	0.743412
MADRS_severe_vs_mild	Anandamide	23	18	88.8959	-30.5443	1.15335	0.25603	0.359983	144.961	0.179817	0.893882	0.743412
MADRS_severe_vs_mild	S-adenosyl-L-homoCysteine	23	18	96.2901	-9.65685	1.67167	0.1028	0.500715	129.543	0.0386308	0.893882	0.743412
MADRS_severe_vs_mild	3-Hydroxy-cis-5-tetradecenoylcarnitine	20	16	-35.6703	112.015	-1.06711	0.302713	-0.401351	-167.638	0.205881	0.893882	0.743412
MADRS_severe_vs_mild	24,25-Dihydrolanosterol	23	18	236.806	-275.625	1.59302	0.119904	0.470265	518.921	0.152883	0.893882	0.743412
MADRS_severe_vs_mild	Ceramide(d18:1/12:0)	22	17	-26.9394	24.269	-1.21846	0.230828	-0.376004	-60.4855	0.184708	0.893882	0.743412
MADRS_severe_vs_mild	PC(16:0/18:2)	23	18	-642.329	-556.748	-0.30393	0.762807	-0.093639	-209.144	0.443301	0.949973	0.743412
MADRS_severe_vs_mild	Agmatine	20	14	-80.7835	129.335	-1.54483	0.140609	-0.604147	-204.349	0.125915	0.893882	0.743412
MADRS_severe_vs_mild	Hydroxykynurenine	23	18	-137.538	105.44	-1.82868	0.0751519	-0.56342	-284.294	0.0525807	0.893882	0.743412
MADRS_severe_vs_mild	N-acetyl spermine	23	18	441.799	-260.088	1.27784	0.208873	0.391999	822.127	0.147241	0.893882	0.743412
MADRS_severe_vs_mild	Nicotinamide Riboside	12	11	121.923	-89.8525	2.88747	0.010171	1.17534	204.528	0.0230346	0.893882	0.743412
MADRS_severe_vs_mild	Octanoylcarnitine	23	18	1.07127	-243.189	0.704289	0.485949	0.224437	254.174	0.441858	0.893882	0.743412
MADRS_severe_vs_mild	9-Decenoylcarnitine	23	18	118.383	-505.223	1.19441	0.23955	0.36239	718.31	0.205154	0.893882	0.743412
MADRS_severe_vs_mild	Decanoylcarnitine	23	18	228.453	-213.951	1.11997	0.271144	0.323847	439.718	0.303375	0.893882	0.743412
MADRS_severe_vs_mild	Dodecenoylcarnitine	22	16	-28.57	65.6017	-0.6719	0.507056	-0.22772	-112.983	0.434805	0.893882	0.743412
MADRS_severe_vs_mild	Dodecanoylcarnitine	20	15	-42.9975	244.223	-0.908717	0.377823	-0.355092	-365.702	0.216215	0.893882	0.743412
MADRS_severe_vs_mild	Myristoylcarnitine	23	18	-122.263	220.603	-1.84799	0.0745771	-0.605391	-381.846	0.0325033	0.893882	0.743412
MADRS_severe_vs_mild	2-Arachidonylglycerol	13	13	-101.328	144.672	-1.12944	0.278974	-0.443003	-273.565	0.270112	0.893882	0.743412
MADRS_severe_vs_mild	Zymosterol	23	18	90.527	175.224	-0.20421	0.839252	-0.0625438	-299.451	0.459918	0.955861	0.743412
MADRS_severe_vs_mild	L-Palmitoylcarnitine	12	11	-94.9453	383.122	-1.01352	0.334666	-0.442804	-525.951	0.353542	0.893882	0.743412
MADRS_severe_vs_mild	Linoleylcarnitine	11	10	-193.677	762.191	-0.996847	0.344881	-0.458017	-1006.48	0.331389	0.893882	0.743412
MADRS_severe_vs_mild	Oleoylcarnitine	13	13	-125.775	471.426	-0.987027	0.343102	-0.387144	-909.869	0.198869	0.893882	0.743412
MADRS_severe_vs_mild	Vitamin K2	17	12	-39.7107	106.351	-1.32372	0.208447	-0.574298	-189.322	0.0469023	0.893882	0.743412
MADRS_severe_vs_mild	Leucine+isoleucine	23	18	-740.202	-2812.19	0.514004	0.610699	0.165641	2889.69	0.449662	0.949973	0.743412
MADRS_severe_vs_mild	Arginine	23	18	80.1811	-84.3079	0.8524	0.399777	0.271087	209.238	0.277126	0.893882	0.743412
MADRS_severe_vs_mild	Methionine	23	18	-66.3286	-517.426	0.74673	0.459995	0.235084	567.512	0.338812	0.893882	0.743412
MADRS_severe_vs_mild	Lysine	23	18	1951.47	-1796.59	0.803242	0.427183	0.254791	4657.9	0.32915	0.893882	0.743412
MADRS_severe_vs_mild	Riboflavin	23	18	-101.447	80.4911	-1.98232	0.0570686	-0.652774	-178.595	0.0693166	0.893882	0.743412
MADRS_severe_vs_mild	Asparagine	23	18	-211.413	-531.511	1.3636	0.182359	0.393971	336.246	0.204011	0.893882	0.743412
MADRS_severe_vs_mild	Nicotinic acid	23	18	-5.84549	-72.5064	2.24774	0.0307402	0.708633	71.5206	0.0188017	0.893882	0.743412
MADRS_severe_vs_mild	Malonic acid	21	17	41.2715	-175.828	0.60354	0.549936	0.192858	284.058	0.446912	0.925113	0.743412
MADRS_severe_vs_mild	L-Threonine	23	18	-7.26584	-414.451	2.17628	0.0357344	0.65535	410.417	0.0435682	0.893882	0.743412
MADRS_severe_vs_mild	Pyroglutamic acid	23	16	-10.6625	40.1121	-1.22439	0.231446	-0.417805	-47.0854	0.257041	0.893882	0.743412
MADRS_severe_vs_mild	Itaconic acid	23	18	81.8508	-101.415	2.28607	0.0278428	0.688128	206.263	0.0222583	0.893882	0.743412
MADRS_severe_vs_mild	Citraconic acid	23	18	76.5814	-81.7419	1.51006	0.139258	0.468918	171.183	0.128631	0.893882	0.743412
MADRS_severe_vs_mild	Ketoleucine	23	18	59.6626	-63.0177	1.25394	0.217532	0.375345	137.365	0.202086	0.893882	0.743412
MADRS_severe_vs_mild	3-methylphenylacetic acid	23	18	71.9717	-111.009	0.673555	0.504677	0.209722	240.206	0.396893	0.893882	0.743412
MADRS_severe_vs_mild	Xanthine	23	18	60.6041	169.734	-0.74783	0.461552	-0.251644	-106.371	0.462866	0.893882	0.743412
MADRS_severe_vs_mild	Orotic acid	23	17	78.6434	-131.786	1.18563	0.243362	0.353277	235.292	0.245663	0.893882	0.743412
MADRS_severe_vs_mild	Allantoin	8	8	10.8002	-44.7072	1.06834	0.304645	0.534172	-53.49	0.429505	0.893882	0.743412
MADRS_severe_vs_mild	Indole-3-carboxylic acid	23	18	60.2373	-50.0754	0.904454	0.371341	0.278553	140.513	0.281458	0.893882	0.743412
MADRS_severe_vs_mild	Homogentisic acid	23	18	136.177	-283.65	1.30941	0.198063	0.400946	508.144	0.117686	0.893882	0.743412
MADRS_severe_vs_mild	Uric acid	23	18	981.916	-2218.26	1.24109	0.221997	0.380359	3894.72	0.132546	0.893882	0.743412
MADRS_severe_vs_mild	Suberic Acid	23	18	-246.112	552.879	-0.960789	0.349902	-0.342057	-994.189	0.193126	0.893882	0.743412
MADRS_severe_vs_mild	Ascorbic acid	23	18	153.006	-179.893	1.21404	0.232476	0.381841	370.738	0.197582	0.893882	0.743412
MADRS_severe_vs_mild	N-carbamoyl-L-aspartate	23	18	2.55509	-57.6839	0.551853	0.584821	0.178062	97.6392	0.357255	0.949973	0.743412
MADRS_severe_vs_mild	Indoleacrylic acid	23	18	-22.0287	-59.1022	0.693985	0.492088	0.218689	49.6375	0.37931	0.893882	0.743412
MADRS_severe_vs_mild	2-Keto-L-gluconate	16	14	135.9	-66.4453	1.23247	0.236579	0.421192	318.897	0.0827967	0.893882	0.743412
MADRS_severe_vs_mild	p-Aminohippuric acid	23	17	-48.4293	1.72843	-0.322925	0.749039	-0.107193	-118.501	0.432045	0.949973	0.743412
MADRS_severe_vs_mild	Cinnamoylglycine	19	12	-74.052	91.7197	-1.09136	0.291474	-0.451759	-209.354	0.154586	0.893882	0.743412
MADRS_severe_vs_mild	Pseudouridine	23	18	28.5479	-7.77454	0.640571	0.525578	0.197596	49.6358	0.416983	0.907817	0.743412
MADRS_severe_vs_mild	glucose-1-phosphate	23	18	88.5978	-34.2991	0.875989	0.386404	0.266405	138.645	0.363831	0.893882	0.743412
MADRS_severe_vs_mild	Inosine	22	16	121.258	-1.346	0.881359	0.3864	0.251993	118.847	0.467068	0.893882	0.743412
MADRS_severe_vs_mild	Xanthosine	23	18	129.178	-28.9665	0.991598	0.328463	0.317903	214.72	0.149619	0.893882	0.743412
MADRS_severe_vs_mild	Eicosapentaenoic acid	22	18	29.1566	-88.5022	1.10691	0.278204	0.324323	119.699	0.337458	0.893882	0.743412
MADRS_severe_vs_mild	11,12-DiHETrE	23	18	116.387	-180.009	1.12112	0.269291	0.349215	376.249	0.136382	0.893882	0.743412
MADRS_severe_vs_mild	Hexose Disaccharide Pool	19	15	-199.037	188.3	-0.827372	0.420813	-0.318843	-417.458	0.342612	0.893882	0.743412
MADRS_severe_vs_mild	Orotidine monophosphate	13	11	12.0909	-24.8548	0.908665	0.3737	0.361132	35.7783	0.422769	0.893882	0.743412
MADRS_severe_vs_mild	PI(36:2)	16	11	-59.338	-55.7208	-0.0604781	0.952263	-0.022522	-59.5588	0.400559	0.989173	0.743412
MADRS_severe_vs_mild	PI(38:4)	22	18	-321.007	-123.516	-0.824528	0.41651	-0.272802	-241.734	0.297793	0.893882	0.743412
MADRS_severe_vs_mild	PI(38:3)	18	17	-135.116	-57.8614	-0.739903	0.466357	-0.254193	-90.2435	0.380934	0.893882	0.743412
MADRS_severe_vs_mild	Gluconolactone	23	17	16.2664	-36.9587	1.1933	0.240398	0.374292	66.2247	0.167544	0.893882	0.743412
MADRS_severe_vs_mild	Indole	23	18	-168.413	-264.024	0.484891	0.630984	0.15629	131.324	0.480978	0.949973	0.747702
MADRS_severe_vs_mild	L-Valine	23	18	-228.123	-577.334	0.478108	0.635981	0.155959	486.368	0.479556	0.949973	0.747702
MADRS_severe_vs_mild	Xanthurenic acid	21	16	-33.3627	-33.2567	-0.000989743	0.999217	-0.000332268	-63.8451	0.510463	0.999217	0.786389
MADRS_severe_vs_mild	Betaine	21	18	-8.42043	-52.5934	0.37806	0.707654	0.122063	75.9995	0.530486	0.949973	0.788809
MADRS_severe_vs_mild	Methionine sulfoxide	23	18	-86.1774	-149.69	0.533215	0.597398	0.171061	74.7342	0.528895	0.949973	0.788809
MADRS_severe_vs_mild	3-Hydroxydodecanoylcarnitine	21	17	-11.3313	35.9592	-0.505026	0.618423	-0.175621	-56.0947	0.525308	0.949973	0.788809
MADRS_severe_vs_mild	Glycine	23	18	108.763	-55.0191	0.52533	0.603144	0.171319	199.979	0.521669	0.949973	0.788809
MADRS_severe_vs_mild	Tryptophan	23	18	-247.048	-333.529	0.344023	0.733292	0.113005	140.648	0.548105	0.949973	0.807982
MADRS_severe_vs_mild	Homoarginine	23	18	-130.345	-201.594	0.395661	0.694985	0.128072	100.661	0.567807	0.949973	0.823097
MADRS_severe_vs_mild	Cholesterol	18	14	-169.449	-162.915	-0.0502816	0.96025	-0.0178633	-79.1398	0.572798	0.989173	0.823097
MADRS_severe_vs_mild	Oxaloacetic acid	23	18	61.5505	-32.0288	0.491693	0.62598	0.156139	108.772	0.570245	0.949973	0.823097
MADRS_severe_vs_mild	Pimelylcarnitine	22	18	11.9113	-70.3609	0.246267	0.806918	0.0790158	182.888	0.590316	0.954441	0.8412
MADRS_severe_vs_mild	Adipoylcarnitine	22	18	-34.7227	68.1157	-0.402538	0.691872	-0.140239	-129.551	0.602164	0.949973	0.845038
MADRS_severe_vs_mild	Glyceric acid	23	18	-12.0837	4.97683	-0.426946	0.672743	-0.141577	-20.253	0.607834	0.949973	0.845038
MADRS_severe_vs_mild	Guanidoacetic acid	18	11	-4.13224	13.0513	-0.462491	0.649138	-0.184879	-17.3738	0.606601	0.949973	0.845038
MADRS_severe_vs_mild	Tyrosine	23	18	-512.791	-762.367	0.304698	0.76259	0.0987804	395.173	0.617984	0.949973	0.845402
MADRS_severe_vs_mild	a-ketoglutarate.1	23	18	20.9918	-40.245	0.480053	0.634366	0.154578	65.0223	0.61763	0.949973	0.845402
MADRS_severe_vs_mild	L-leucine + L-Isoleucine	23	18	-1103.07	-2054.74	0.238265	0.813297	0.077952	1756.98	0.638833	0.954441	0.865806
MADRS_severe_vs_mild	Adenine	23	18	-51.9401	-91.0337	0.296161	0.769	0.0956525	59.1074	0.655416	0.949973	0.865806
MADRS_severe_vs_mild	L-Tyrosine	23	18	-383.347	-557.361	0.253303	0.801657	0.0819919	301.022	0.650414	0.954441	0.865806
MADRS_severe_vs_mild	N-acetyl-glutamine	23	18	39.8474	13.1092	0.0841522	0.933368	0.02591	143.058	0.649042	0.985222	0.865806
MADRS_severe_vs_mild	Cytidine monophosphate	20	16	4.85041	41.2177	-0.966663	0.34143	-0.329286	-15.2849	0.660724	0.893882	0.865806
MADRS_severe_vs_mild	Mevalonic acid	16	12	-19.3472	-4.56094	-0.382955	0.70635	-0.15569	-15.8351	0.663279	0.949973	0.865806
MADRS_severe_vs_mild	1-Methylhistidine	23	18	-54.0853	50.2375	-0.426902	0.67285	-0.142051	-93.0839	0.695044	0.949973	0.87596
MADRS_severe_vs_mild	Propionylcarnitine	23	18	-276.655	2.17169	-0.484324	0.63149	-0.157019	-206.318	0.701793	0.949973	0.87596
MADRS_severe_vs_mild	1-Methyladenosine	23	18	30.3466	-0.58283	0.276934	0.783311	0.0856156	43.9615	0.697881	0.949973	0.87596
MADRS_severe_vs_mild	Phosphorylcholine	17	15	-626.965	-489.141	-0.409579	0.685026	-0.143699	-117.88	0.70092	0.949973	0.87596
MADRS_severe_vs_mild	Histidine	23	18	-9.00054	-45.6461	0.228527	0.820484	0.0715592	65.4042	0.683443	0.954441	0.87596
MADRS_severe_vs_mild	PI(36:4)	15	17	-10.9543	7.17313	-0.112777	0.911032	-0.0388529	-72.1857	0.678479	0.979789	0.87596
MADRS_severe_vs_mild	L-Glutamic acid	23	18	85.4227	-32.8539	0.183822	0.855244	0.0588169	230.556	0.725102	0.955861	0.879379
MADRS_severe_vs_mild	2-Octenoylcarnitine	23	18	-208.878	-270.945	0.369122	0.714121	0.115555	64.7562	0.723567	0.949973	0.879379
MADRS_severe_vs_mild	Aspartic acid	23	18	59.1065	2.91152	0.149824	0.881865	0.048672	129.904	0.723955	0.96666	0.879379
MADRS_severe_vs_mild	Plasmalogen(p16:0/20:4)	21	17	-236.057	-253.301	0.184891	0.854358	0.0593744	-28.9884	0.722148	0.955861	0.879379
MADRS_severe_vs_mild	L-Proline	23	18	-548.463	-1272.85	0.203083	0.840527	0.0670742	1151.01	0.737964	0.955861	0.88246
MADRS_severe_vs_mild	Quinolinic Acid	21	12	0.762298	18.9411	-0.309434	0.761406	-0.131979	-18.3456	0.733434	0.949973	0.88246
MADRS_severe_vs_mild	L-Lactic acid	22	18	118.972	426.632	-0.41078	0.684192	-0.135177	-236.734	0.754637	0.949973	0.896131
MADRS_severe_vs_mild	Glutamic acid	23	18	40.7452	240.992	-0.486527	0.630386	-0.160925	-120.818	0.760044	0.949973	0.896328
MADRS_severe_vs_mild	Sarcosine	23	18	-375.084	-637.508	0.154208	0.878358	0.0493581	453.999	0.789947	0.96666	0.902719
MADRS_severe_vs_mild	L-Acetylcarnitine	23	18	-250.269	-261.549	0.00684802	0.994572	0.00213266	451.4	0.787503	0.999217	0.902719
MADRS_severe_vs_mild	BMP(18:1/16:0)	8	9	-4.00243	-29.6801	0.365137	0.721014	0.180852	20.8988	0.791859	0.949973	0.902719
MADRS_severe_vs_mild	Taurine	23	18	464.165	298.726	0.18774	0.852127	0.0592512	249.329	0.785071	0.955861	0.902719
MADRS_severe_vs_mild	Azelaic acid	20	18	719.683	686.453	0.0185191	0.985359	0.00617076	-508.052	0.779583	0.999217	0.902719
MADRS_severe_vs_mild	Alanine	23	18	-404.81	-560.732	0.0912589	0.927839	0.0293727	341.205	0.840827	0.985222	0.924949
MADRS_severe_vs_mild	3-Aminoisobutyric acid	23	18	-21.1762	18.7024	-0.343065	0.733483	-0.107563	-25.9845	0.832212	0.949973	0.924949
MADRS_severe_vs_mild	Purine	23	18	-96.251	-75.6104	-0.232398	0.817582	-0.073938	-18.2008	0.844159	0.954441	0.924949
MADRS_severe_vs_mild	Ornithine	23	18	-38.331	-7.36013	-0.255962	0.799477	-0.0814195	20.6641	0.862471	0.954441	0.924949
MADRS_severe_vs_mild	L-Carnitine	23	18	-944.9	-299.17	-0.345906	0.73157	-0.110955	-336.932	0.849042	0.949973	0.924949
MADRS_severe_vs_mild	L-Phenylalanine	23	18	-432.309	-489.991	0.0638598	0.949434	0.0201678	158.343	0.86545	0.989173	0.924949
MADRS_severe_vs_mild	Hexanoylcarnitine	23	18	72.4714	148.26	-0.189743	0.850853	-0.0625515	-73.2114	0.857392	0.955861	0.924949
MADRS_severe_vs_mild	L-Glutarylcarnitine	23	18	35.3056	57.5402	-0.0984781	0.922237	-0.0324388	-52.2638	0.817116	0.985222	0.924949
MADRS_severe_vs_mild	2-Hydroxyglutarate	23	18	35.7396	23.3291	0.132093	0.895604	0.0410073	18.2276	0.853183	0.969293	0.924949
MADRS_severe_vs_mild	PI(40:5)	13	10	-18.2372	-1.6753	-0.283364	0.78108	-0.127133	11.9355	0.844101	0.949973	0.924949
MADRS_severe_vs_mild	a-ketoglutarate	23	18	45.2449	55.5965	-0.0521726	0.95873	-0.0170062	-28.0902	0.88764	0.989173	0.942773
MADRS_severe_vs_mild	Phenylpropiolic acid	23	18	40.7884	0.990935	0.136459	0.892298	0.044014	38.7308	0.895159	0.969293	0.94489
MADRS_severe_vs_mild	Pantothenic acid	23	18	-54.3838	-72.0759	0.158757	0.874938	0.0520424	-13.5905	0.901692	0.96666	0.945947
MADRS_severe_vs_mild	Creatinine	23	18	-0.333678	174.171	-0.291426	0.772538	-0.0936833	-57.8294	0.921842	0.949973	0.949609
MADRS_severe_vs_mild	Aspartylglycosamine	23	16	-2.58715	24.3727	-0.328859	0.745283	-0.11662	-7.70247	0.920491	0.949973	0.949609
MADRS_severe_vs_mild	Pyruvic acid	23	18	-113.899	-172.25	0.3134	0.756142	0.102484	17.0593	0.91554	0.949973	0.949609
MADRS_severe_vs_mild	Hypoxanthine	23	18	249.11	155.631	0.2849	0.777549	0.0825352	26.1246	0.939858	0.949973	0.96237
MADRS_severe_vs_mild	PI(38:5)	13	11	-24.8153	-22.1865	-0.0347296	0.972644	-0.014434	-3.44745	0.964635	0.995941	0.98186
MADRS_severe_vs_mild	Dephospho-CoA	23	18	12.1402	-0.313489	0.307977	0.759853	0.0970608	0.804466	0.9846	0.949973	0.996252
MADRS_severe_vs_mild	Uridine	23	18	11.5999	12.1556	-0.00898671	0.992886	-0.00290918	-0.0932032	0.998864	0.999217	0.998998
MADRS_severe_vs_mild	PI(36:1)	10	10	-36.9889	-51.8979	0.311102	0.759383	0.139129	-0.0821736	0.998998	0.949973	0.998998
MoCA_impair_vs_normal	Urea	28	13	-192.079	-72.4797	-0.450359	0.657264	-0.16149	-161.798	0.521727	0.997413	0.96182
MoCA_impair_vs_normal	Trimethylamine-N-oxide	28	13	24.7911	-4.8951	0.266571	0.792595	0.096971	88.2531	0.362105	0.997413	0.96182
MoCA_impair_vs_normal	Sarcosine	28	13	-1027.14	665.979	-0.867391	0.396723	-0.322086	-1609.48	0.390101	0.997413	0.96182
MoCA_impair_vs_normal	Alanine	28	13	-1081.77	837.372	-0.970245	0.344768	-0.366989	-1855.01	0.319349	0.997413	0.96182
MoCA_impair_vs_normal	beta-Alanine	28	13	-12.6666	198.757	-0.633844	0.532608	-0.216996	-211.085	0.543603	0.997413	0.96182
MoCA_impair_vs_normal	Dimethylglycine	28	13	-288.669	-518.993	0.532128	0.597745	0.145213	353.142	0.501552	0.997413	0.96182
MoCA_impair_vs_normal	3-Aminoisobutyric acid	28	13	-35.6049	65.1176	-0.79561	0.434703	-0.27357	-98.049	0.467495	0.997413	0.96182
MoCA_impair_vs_normal	Hypotaurine	28	13	-97.5147	-66.4105	-0.207813	0.836689	-0.0616707	-115.571	0.488269	0.997413	0.96182
MoCA_impair_vs_normal	Creatinine	28	13	-180.76	629.9	-1.20792	0.241853	-0.444374	-814.172	0.205585	0.997413	0.96182
MoCA_impair_vs_normal	L-Proline	28	13	-2137.46	1871	-0.945274	0.358286	-0.376895	-5480.16	0.143086	0.997413	0.96182
MoCA_impair_vs_normal	Betaine	26	13	-62.5058	38.5876	-0.792139	0.43694	-0.281381	-134.244	0.316147	0.997413	0.96182
MoCA_impair_vs_normal	Guanidinoacetic acid	28	13	-3027.25	576.535	-1.04401	0.311055	-0.406533	-3687.52	0.222467	0.997413	0.96182
MoCA_impair_vs_normal	Indole	28	13	-299.132	-19.2497	-1.27961	0.215805	-0.467262	-322.817	0.111233	0.997413	0.96182
MoCA_impair_vs_normal	L-Valine	28	13	-658.298	214.884	-0.999745	0.331818	-0.39561	-889.004	0.238785	0.997413	0.96182
MoCA_impair_vs_normal	Purine	28	13	-124.828	-6.12226	-1.19402	0.246751	-0.433932	-112.058	0.268861	0.997413	0.96182
MoCA_impair_vs_normal	Pipecolic acid	28	13	-573.819	2027.87	-0.707995	0.486375	-0.244044	-2890.83	0.451078	0.997413	0.96182
MoCA_impair_vs_normal	N-acetyl-L-alanine	28	13	-1111.46	-2340.08	0.82255	0.416766	0.242938	1084.12	0.544732	0.997413	0.96182
MoCA_impair_vs_normal	Creatine	28	13	-1227.59	-2464.88	0.773793	0.444963	0.233615	1090.52	0.559639	0.997413	0.96182
MoCA_impair_vs_normal	Hydroxyproline	28	13	-264.296	-83.1972	-0.485211	0.632601	-0.171507	-289.318	0.442438	0.997413	0.96182
MoCA_impair_vs_normal	L-leucine + L-Isoleucine	28	13	-2825.7	1289.51	-0.854192	0.405388	-0.341251	-4133.8	0.314476	0.997413	0.96182
MoCA_impair_vs_normal	Ornithine	28	13	-90.594	117.118	-1.46688	0.160252	-0.565067	-285.428	0.0245291	0.997413	0.96182
MoCA_impair_vs_normal	Methylcysteine	28	13	-38.5016	458.964	-0.654024	0.520351	-0.232379	-656.925	0.39148	0.997413	0.96182
MoCA_impair_vs_normal	Adenine	28	13	-124.844	50.9541	-1.14167	0.269008	-0.438947	-197.764	0.170987	0.997413	0.96182
MoCA_impair_vs_normal	O-Phosphoethanolamine	25	12	-2.123	70.7139	-1.22672	0.237844	-0.496025	-92.714	0.107475	0.997413	0.96182
MoCA_impair_vs_normal	L-Glutamine	28	13	-980.959	3058.92	-0.818009	0.423137	-0.296288	-4245.74	0.387103	0.997413	0.96182
MoCA_impair_vs_normal	L-Lysine	28	13	-1072.26	3309.76	-0.827773	0.417519	-0.297039	-4503.52	0.398875	0.997413	0.96182
MoCA_impair_vs_normal	L-Glutamic acid	28	13	-233.53	608.631	-1.12938	0.273551	-0.427212	-868.747	0.225521	0.997413	0.96182
MoCA_impair_vs_normal	DL-2-Aminooctanoic acid	28	13	-19.3687	97.7266	-0.352203	0.728561	-0.12976	-169.054	0.584966	0.997413	0.96182
MoCA_impair_vs_normal	L-Carnitine	28	13	-1252.44	611.575	-0.855543	0.40348	-0.32357	-1701.3	0.381525	0.997413	0.96182
MoCA_impair_vs_normal	7-methylguanine	28	13	-18.4233	108.155	-0.804139	0.429718	-0.274494	-111.018	0.499817	0.997413	0.96182
MoCA_impair_vs_normal	L-Phenylalanine	28	13	-691.826	46.7848	-0.736259	0.469799	-0.260214	-600.119	0.55997	0.997413	0.96182
MoCA_impair_vs_normal	1-Methylhistidine	28	13	-182.474	366.892	-1.93219	0.0719556	-0.798393	-656.689	0.00848219	0.997413	0.96182
MoCA_impair_vs_normal	Citrulline	28	13	-477.984	410.43	-0.556099	0.584003	-0.195413	-1052.35	0.506646	0.997413	0.96182
MoCA_impair_vs_normal	L-Tyrosine	28	13	-649.113	-51.8704	-0.754774	0.460019	-0.283728	-599.864	0.411836	0.997413	0.96182
MoCA_impair_vs_normal	N-acetyl-glutamine	28	13	-52.9685	202.736	-0.722012	0.477929	-0.249513	-293.096	0.396682	0.997413	0.96182
MoCA_impair_vs_normal	Homoarginine	28	13	-238.004	2.88196	-1.16797	0.258024	-0.441567	-284.113	0.138727	0.997413	0.96182
MoCA_impair_vs_normal	5-Hydroxyindoleacetic acid	28	13	-95.6873	6.92974	-0.750325	0.461332	-0.263282	-166.265	0.218126	0.997413	0.96182
MoCA_impair_vs_normal	Dimethyl-L-arginine	28	13	-0.514835	151.451	-1.09122	0.288384	-0.395806	-133.278	0.344798	0.997413	0.96182
MoCA_impair_vs_normal	L-Acetylcarnitine	28	13	-601.055	489.653	-0.617106	0.543111	-0.207227	-1583.17	0.389576	0.997413	0.96182
MoCA_impair_vs_normal	L-Tryptophan	28	13	-1571.17	-319.537	-0.850061	0.40631	-0.319547	-1446.95	0.2714	0.997413	0.96182
MoCA_impair_vs_normal	L-Kynurenine	28	13	-166.323	-13.4073	-0.716237	0.482433	-0.262085	-188.371	0.356539	0.997413	0.96182
MoCA_impair_vs_normal	Propionylcarnitine	28	13	-289.566	137.222	-0.620929	0.542819	-0.24116	-400.194	0.500236	0.997413	0.96182
MoCA_impair_vs_normal	Butyrylcarnitine	28	13	-313.405	-84.0506	-0.359069	0.724181	-0.14389	-380.792	0.478305	0.997413	0.96182
MoCA_impair_vs_normal	Cystine	28	13	-146.294	365.251	-0.858454	0.400642	-0.306357	-629.147	0.293551	0.997413	0.96182
MoCA_impair_vs_normal	Malonylcarnitine	28	13	20.9587	-146.177	1.36484	0.181515	0.399898	163.188	0.28141	0.997413	0.96182
MoCA_impair_vs_normal	Glycerophosphocholine	28	13	340.59	2021.15	-0.623426	0.538494	-0.201739	-2941.28	0.302728	0.997413	0.96182
MoCA_impair_vs_normal	3-Hydroxyhexanoylcarnitine	28	13	-4.5412	135.258	-0.90283	0.378914	-0.347295	-101.398	0.493363	0.997413	0.96182
MoCA_impair_vs_normal	L-Glutarylcarnitine	28	13	-39.4418	227.087	-1.01417	0.324727	-0.395661	-218.649	0.378403	0.997413	0.96182
MoCA_impair_vs_normal	2-Octenoylcarnitine	28	13	-306.865	-83.769	-1.20492	0.241568	-0.423003	-230.723	0.24955	0.997413	0.96182
MoCA_impair_vs_normal	Adipoylcarnitine	27	13	-75.0922	191.513	-0.770605	0.455297	-0.368273	-312.069	0.252973	0.997413	0.96182
MoCA_impair_vs_normal	5-Methylthioadenosine	28	13	-199.495	-173.121	-0.435346	0.667343	-0.146958	-34.2508	0.573781	0.997413	0.96182
MoCA_impair_vs_normal	Pimelylcarnitine	27	13	-87.3539	104.162	-0.593965	0.557057	-0.184507	-211.402	0.574003	0.997413	0.96182
MoCA_impair_vs_normal	Suberylcarnitine	26	13	-99.1412	494.804	-1.00279	0.335713	-0.487539	-601.83	0.192223	0.997413	0.96182
MoCA_impair_vs_normal	Cytidine monophosphate	25	11	16.5813	31.0872	-0.315876	0.75651	-0.129765	-46.5852	0.222454	0.997413	0.96182
MoCA_impair_vs_normal	3-Hydroxydodecanoylcarnitine	25	13	-21.1912	69.4716	-0.827301	0.420508	-0.339917	-96.607	0.311009	0.997413	0.96182
MoCA_impair_vs_normal	3-Hydroxy-cis-5-tetradecenoylcarnitine	24	12	-28.9576	147.818	-0.954127	0.360471	-0.483362	-193.012	0.186941	0.997413	0.96182
MoCA_impair_vs_normal	Ceramide(d18:1/12:0)	26	13	13.4582	-40.7697	1.23572	0.226925	0.398274	73.918	0.142491	0.997413	0.96182
MoCA_impair_vs_normal	Dephospho-CoA	28	13	13.7848	-8.6456	0.532042	0.599468	0.175213	54.3916	0.232311	0.997413	0.96182
MoCA_impair_vs_normal	BMP(18:1/16:0)	13	4	-52.1314	94.642	-2.47377	0.0412736	-1.16209	-169.427	0.0625441	0.997413	0.96182
MoCA_impair_vs_normal	Phosphorylcholine	21	11	-743.478	-216.589	-1.40514	0.178702	-0.568772	-213.281	0.525872	0.997413	0.96182
MoCA_impair_vs_normal	Octanoylcarnitine	28	13	-64.5107	-195.882	0.358396	0.723239	0.120127	201.816	0.581094	0.997413	0.96182
MoCA_impair_vs_normal	Aspartylglycosamine	26	13	-22.6615	70.7428	-1.03352	0.316168	-0.411251	-99.0196	0.226699	0.997413	0.96182
MoCA_impair_vs_normal	Dodecenoylcarnitine	25	13	-5.43165	42.8367	-0.303162	0.765199	-0.116134	-100.515	0.496752	0.997413	0.96182
MoCA_impair_vs_normal	Dodecanoylcarnitine	24	11	-77.2417	423.382	-1.20283	0.255808	-0.636614	-542.112	0.0916706	0.997413	0.96182
MoCA_impair_vs_normal	2-Arachidonylglycerol	18	8	-82.1139	255.19	-0.969725	0.363697	-0.617382	-326.697	0.254907	0.997413	0.96182
MoCA_impair_vs_normal	Zymosterol	28	13	206.705	-42.4295	0.538378	0.595649	0.18459	549.644	0.215961	0.997413	0.96182
MoCA_impair_vs_normal	L-Palmitoylcarnitine	14	9	-90.6858	482.734	-0.99368	0.349461	-0.536516	-596.852	0.275511	0.997413	0.96182
MoCA_impair_vs_normal	Linoleylcarnitine	16	5	-197.656	1730.79	-1.00687	0.370963	-0.98134	-2404.68	0.044735	0.997413	0.96182
MoCA_impair_vs_normal	Oleoylcarnitine	16	10	-129.239	656.127	-0.999012	0.343884	-0.51584	-764.217	0.291206	0.997413	0.96182
MoCA_impair_vs_normal	Vitamin K2	20	9	-16.1964	102.785	-0.808727	0.440395	-0.459703	-128.8	0.206141	0.997413	0.96182
MoCA_impair_vs_normal	Leucine+isoleucine	28	13	-2983	1221.55	-0.89423	0.383058	-0.339299	-4081.71	0.332226	0.997413	0.96182
MoCA_impair_vs_normal	Histidine	28	13	-121.844	183.308	-1.55026	0.140385	-0.621083	-308.957	0.074462	0.997413	0.96182
MoCA_impair_vs_normal	Tyrosine	28	13	-841.911	-149.486	-0.748337	0.463444	-0.276075	-677.585	0.437509	0.997413	0.96182
MoCA_impair_vs_normal	Tryptophan	28	13	-399.25	-38.9696	-1.2358	0.233356	-0.482285	-424.508	0.0946296	0.997413	0.96182
MoCA_impair_vs_normal	Methionine	28	13	-407.139	43.1287	-0.657309	0.51834	-0.234444	-370.364	0.573597	0.997413	0.96182
MoCA_impair_vs_normal	Lysine	28	13	-893.529	2889.54	-0.718799	0.480469	-0.256946	-3860.52	0.465323	0.997413	0.96182
MoCA_impair_vs_normal	Riboflavin	28	13	19.8575	-110.804	1.60773	0.116718	0.455273	121.203	0.271715	0.997413	0.96182
MoCA_impair_vs_normal	Aspartic acid	28	13	-81.4952	284.133	-0.806879	0.431232	-0.320257	-421.864	0.295483	0.997413	0.96182
MoCA_impair_vs_normal	Glutamic acid	28	13	29.7852	341.617	-0.60087	0.556854	-0.251555	-421.697	0.331302	0.997413	0.96182
MoCA_impair_vs_normal	Glycine	28	13	-33.1412	187.628	-0.604549	0.553192	-0.231454	-233.893	0.497189	0.997413	0.96182
MoCA_impair_vs_normal	Asparagine	28	13	-244.19	-584.029	1.56091	0.126706	0.418191	297.045	0.31168	0.997413	0.96182
MoCA_impair_vs_normal	Nicotinic acid	28	13	-25.5844	-55.6307	0.987603	0.331417	0.303604	48.5851	0.159057	0.997413	0.96182
MoCA_impair_vs_normal	L-Lactic acid	27	13	78.8598	628.274	-0.623206	0.541307	-0.242454	-611.938	0.456272	0.997413	0.96182
MoCA_impair_vs_normal	Guanidoacetic acid	18	11	15.5021	-19.0776	0.964913	0.346174	0.377048	22.3682	0.519681	0.997413	0.96182
MoCA_impair_vs_normal	Itaconic acid	28	13	23.8987	-47.0821	0.7871	0.438321	0.253377	76.8918	0.455926	0.997413	0.96182
MoCA_impair_vs_normal	Hypoxanthine	28	13	157.407	317.193	-0.319812	0.753858	-0.141275	-269.747	0.478898	0.997413	0.96182
MoCA_impair_vs_normal	Mevalonic acid	19	9	-22.6131	7.26263	-0.645595	0.53238	-0.317259	-22.87	0.526718	0.997413	0.96182
MoCA_impair_vs_normal	3-methylphenylacetic acid	28	13	-77.2188	139.947	-0.67527	0.507668	-0.249241	-215.057	0.492973	0.997413	0.96182
MoCA_impair_vs_normal	Orotic acid	27	13	-72.5424	117.468	-0.761414	0.458078	-0.317632	-200.377	0.369307	0.997413	0.96182
MoCA_impair_vs_normal	Allantoin	13	3	-2.46288	-79.7464	1.94313	0.0846633	0.749291	39.7491	0.568901	0.997413	0.96182
MoCA_impair_vs_normal	Quinolinic Acid	21	12	26.7796	-26.5892	1.26114	0.216669	0.393952	79.5521	0.150313	0.997413	0.96182
MoCA_impair_vs_normal	Homogentisic acid	28	13	6.58756	-166.007	0.540457	0.592706	0.161987	226.48	0.534025	0.997413	0.96182
MoCA_impair_vs_normal	Uric acid	28	13	-28.5454	-1272.72	0.479275	0.635184	0.145533	1650.84	0.5693	0.997413	0.96182
MoCA_impair_vs_normal	Suberic Acid	28	13	-284.506	942.878	-1.07764	0.302196	-0.534226	-1216.33	0.148161	0.997413	0.96182
MoCA_impair_vs_normal	Indoleacrylic acid	28	13	-13.626	-91.4593	1.49761	0.145339	0.467521	56.2179	0.367081	0.997413	0.96182
MoCA_impair_vs_normal	Azelaic acid	25	13	265.441	1547.21	-0.56829	0.578322	-0.239638	-1357.6	0.490267	0.997413	0.96182
MoCA_impair_vs_normal	Pantothenic acid	28	13	-55.2761	-76.9587	0.194263	0.847553	0.0637879	97.9866	0.417732	0.997413	0.96182
MoCA_impair_vs_normal	Eicosapentaenoic acid	27	13	4.86805	-83.3101	0.963655	0.341854	0.241405	89.0333	0.516351	0.997413	0.96182
MoCA_impair_vs_normal	Hexose Disaccharide Pool	23	11	-206.512	344.779	-0.874857	0.401535	-0.458706	-642.817	0.188118	0.997413	0.96182
MoCA_impair_vs_normal	Orotidine monophosphate	17	7	21.0798	-67.7969	3.13073	0.00541795	0.933954	91.9887	0.0691337	0.92647	0.96182
MoCA_impair_vs_normal	PI(36:4)	21	11	48.4657	-96.3774	1.09049	0.284995	0.314044	297.122	0.116881	0.997413	0.96182
MoCA_impair_vs_normal	PI(36:2)	17	10	-53.5698	-65.1652	0.182987	0.856692	0.0722397	59.696	0.355096	0.997413	0.96182
MoCA_impair_vs_normal	PI(38:5)	17	7	-33.0077	-0.788496	-0.441884	0.665051	-0.177534	60.2686	0.509385	0.997413	0.96182
MoCA_impair_vs_normal	PI(40:5)	15	8	-18.5914	3.12928	-0.366124	0.720218	-0.166947	35.3702	0.547086	0.997413	0.96182
MoCA_impair_vs_normal	Methylguanidine	28	12	-169.79	-99.2595	-0.279476	0.78297	-0.101908	-77.0037	0.772457	0.997413	0.969342
MoCA_impair_vs_normal	Histamine	22	10	23.8875	-1.87667	0.279023	0.783723	0.109502	29.1144	0.776607	0.997413	0.969342
MoCA_impair_vs_normal	L-Methionine	28	13	-455.885	-46.136	-0.462942	0.648012	-0.16053	-326.353	0.709247	0.997413	0.969342
MoCA_impair_vs_normal	L-Histidine	28	13	-284.097	195.348	-0.81987	0.420277	-0.271601	-296.966	0.63181	0.997413	0.969342
MoCA_impair_vs_normal	Methionine sulfoxide	28	13	-135.944	-66.9272	-0.524707	0.605369	-0.185914	-55.5396	0.672236	0.997413	0.969342
MoCA_impair_vs_normal	N-Acetylornithine	28	13	39.562	150.914	-0.394554	0.696687	-0.131715	-131.342	0.65564	0.997413	0.969342
MoCA_impair_vs_normal	Serotonin	28	13	-77.0358	52.3414	-0.436698	0.666621	-0.151115	-153.031	0.608398	0.997413	0.969342
MoCA_impair_vs_normal	Normetanephrine	28	13	-99.1931	-16.3134	-0.307029	0.761195	-0.0977966	-93.1868	0.754165	0.997413	0.969342
MoCA_impair_vs_normal	Acetyllysine	28	13	-158.925	-47.4816	-0.467569	0.643602	-0.144663	-110.037	0.668246	0.997413	0.969342
MoCA_impair_vs_normal	Tiglylcarnitine	28	13	-20.7026	184.599	-0.418595	0.679675	-0.14595	-215.397	0.66313	0.997413	0.969342
MoCA_impair_vs_normal	3-Hydroxyisovaleryl carnitine	28	13	-16.4709	-75.134	0.390741	0.698461	0.113842	73.5192	0.665508	0.997413	0.969342
MoCA_impair_vs_normal	7-Methylguanosine	28	13	36.5952	86.4504	-0.540717	0.593453	-0.176433	-43.6842	0.667446	0.997413	0.969342
MoCA_impair_vs_normal	Anandamide	28	13	49.7971	7.72993	0.385051	0.703387	0.124933	51.0955	0.672294	0.997413	0.969342
MoCA_impair_vs_normal	S-adenosyl-L-homoCysteine	28	13	44.9817	60.1048	-0.225157	0.823422	-0.0692984	-33.4293	0.639071	0.997413	0.969342
MoCA_impair_vs_normal	Agmatine	26	8	16.194	-28.2527	0.326038	0.749503	0.122361	48.6897	0.770882	0.997413	0.969342
MoCA_impair_vs_normal	Decanoylcarnitine	28	13	123.688	-158.458	0.807449	0.424383	0.204757	229.441	0.628857	0.997413	0.969342
MoCA_impair_vs_normal	Cholesterol	21	11	-159.356	-180.402	0.149215	0.882997	0.057559	70.5472	0.620951	0.997413	0.969342
MoCA_impair_vs_normal	Pyruvic acid	28	13	-176.81	-59.1924	-0.636221	0.530352	-0.207299	62.7659	0.723601	0.997413	0.969342
MoCA_impair_vs_normal	Taurine	28	13	425.313	318.777	0.128746	0.898359	0.0381445	-318.68	0.752221	0.997413	0.969342
MoCA_impair_vs_normal	Citraconic acid	28	13	-10.9198	45.8286	-0.460208	0.650231	-0.163986	-50.9627	0.686825	0.997413	0.969342
MoCA_impair_vs_normal	Oxaloacetic acid	28	13	-13.6628	93.9771	-0.480825	0.636291	-0.179691	-64.2523	0.761779	0.997413	0.969342
MoCA_impair_vs_normal	a-ketoglutarate.1	28	13	2.26231	-23.4571	0.212382	0.833246	0.0647536	43.1382	0.764513	0.997413	0.969342
MoCA_impair_vs_normal	2-Hydroxyglutarate	28	13	15.8994	61.2887	-0.469374	0.642654	-0.15033	-34.2352	0.752834	0.997413	0.969342
MoCA_impair_vs_normal	Ascorbic acid	28	13	-36.8983	101.093	-0.437536	0.66631	-0.155802	-111.331	0.729053	0.997413	0.969342
MoCA_impair_vs_normal	2-Keto-L-gluconate	21	9	84.2615	-58.3689	1.13216	0.270834	0.292896	79.9217	0.712093	0.997413	0.969342
MoCA_impair_vs_normal	p-Aminohippuric acid	28	12	-39.099	0.856899	-0.245595	0.80843	-0.0853335	67.8096	0.686689	0.997413	0.969342
MoCA_impair_vs_normal	Cinnamoylglycine	20	11	-9.68954	-10.2329	0.00400243	0.996841	0.00144377	64.5673	0.682314	0.997413	0.969342
MoCA_impair_vs_normal	Xanthurenic acid	26	11	-46.3081	-2.61031	-0.385014	0.704442	-0.137248	-31.0963	0.770618	0.997413	0.969342
MoCA_impair_vs_normal	Pseudouridine	28	13	20.6411	-4.71465	0.452754	0.653955	0.137539	23.8095	0.725463	0.997413	0.969342
MoCA_impair_vs_normal	glucose-1-phosphate	28	13	69.8409	-41.1678	0.753099	0.457968	0.240012	60.1975	0.722451	0.997413	0.969342
MoCA_impair_vs_normal	Inosine	27	11	79.6427	45.071	0.20889	0.836529	0.0705213	-73.6606	0.689577	0.997413	0.969342
MoCA_impair_vs_normal	PI(38:4)	27	13	-228.309	-240.084	0.0494255	0.960957	0.0161095	89.0202	0.73172	0.997413	0.969342
MoCA_impair_vs_normal	PI(38:3)	24	11	-100.985	-90.189	-0.105995	0.916448	-0.0352285	56.9877	0.623218	0.997413	0.969342
MoCA_impair_vs_normal	Hexanoylcarnitine	28	13	93.9395	131.17	-0.0795295	0.937524	-0.0307158	-112.231	0.802967	0.997413	0.994981
MoCA_impair_vs_normal	L-Serine	28	13	-10.0787	219.883	-0.243405	0.809834	-0.0821338	-190.921	0.845377	0.997413	0.996176
MoCA_impair_vs_normal	Threonine	28	13	-630.587	-597.75	-0.0262708	0.979209	-0.0078894	66.5948	0.963663	0.997413	0.996176
MoCA_impair_vs_normal	Homocysteine	28	13	-24.5703	-10.1488	-0.113048	0.911073	-0.0398901	5.83209	0.96465	0.997413	0.996176
MoCA_impair_vs_normal	1-Methylnicotinamide	28	13	218.116	136.621	0.315228	0.754359	0.0780885	-83.1805	0.822745	0.997413	0.996176
MoCA_impair_vs_normal	Acetylcholine	28	13	81.2231	260.211	-0.403257	0.689981	-0.128778	-64.0188	0.889607	0.997413	0.996176
MoCA_impair_vs_normal	N-acetyl-glutamate	28	13	-33.3796	272.585	-0.172305	0.86478	-0.0595195	-212.818	0.907546	0.997413	0.996176
MoCA_impair_vs_normal	Isovalerylcarnitine	28	13	-142.221	-146.04	0.00847162	0.993312	0.00284669	-75.0216	0.872531	0.997413	0.996176
MoCA_impair_vs_normal	Saccharopine	23	12	-26.6305	-29.13	0.0487196	0.961557	0.017099	-5.89212	0.915426	0.997413	0.996176
MoCA_impair_vs_normal	1-Methyladenosine	28	13	11.4091	28.3096	-0.133538	0.895025	-0.0467494	1.51429	0.99035	0.997413	0.996176
MoCA_impair_vs_normal	24,25-Dihydrolanosterol	28	13	49.0504	-68.3172	0.353068	0.726352	0.104884	42.4574	0.916917	0.997413	0.996176
MoCA_impair_vs_normal	PC(16:0/18:2)	28	13	-678.433	-446.07	-0.713029	0.484022	-0.255836	-39.1882	0.896941	0.997413	0.996176
MoCA_impair_vs_normal	Hydroxykynurenine	28	13	-44.9892	-0.44285	-0.293663	0.77165	-0.0994064	-5.76223	0.972398	0.997413	0.996176
MoCA_impair_vs_normal	N-acetyl spermine	28	13	112.074	180.132	-0.110426	0.913024	-0.0372815	-49.4558	0.938041	0.997413	0.996176
MoCA_impair_vs_normal	9-Decenoylcarnitine	28	13	-153.747	-158.945	0.00996194	0.992114	0.00297075	-81.4958	0.897642	0.997413	0.996176
MoCA_impair_vs_normal	Myristoylcarnitine	28	13	43.1995	-3.90649	0.234644	0.816569	0.0795451	3.30241	0.987084	0.997413	0.996176
MoCA_impair_vs_normal	Arginine	28	13	8.77038	6.23479	0.0119101	0.990607	0.00413959	18.2021	0.932366	0.997413	0.996176
MoCA_impair_vs_normal	Malonic acid	25	13	-71.0928	-26.5428	-0.116106	0.908498	-0.0393921	-75.4254	0.853116	0.997413	0.996176
MoCA_impair_vs_normal	Glyceric acid	28	13	-7.66151	2.01391	-0.222805	0.825947	-0.080143	-4.43009	0.919189	0.997413	0.996176
MoCA_impair_vs_normal	L-Threonine	28	13	-187.291	-183.314	-0.0175661	0.986144	-0.00607306	26.456	0.908983	0.997413	0.996176
MoCA_impair_vs_normal	Pyroglutamic acid	26	13	11.4354	7.63368	0.077967	0.938761	0.0306122	-0.696853	0.987714	0.997413	0.996176
MoCA_impair_vs_normal	Ketoleucine	28	13	2.10399	13.7699	-0.116985	0.907619	-0.0350636	9.35171	0.938068	0.997413	0.996176
MoCA_impair_vs_normal	a-ketoglutarate	28	13	43.4433	63.4583	-0.102529	0.919114	-0.0328846	18.1442	0.934141	0.997413	0.996176
MoCA_impair_vs_normal	Phenylpropiolic acid	28	13	4.26908	64.3412	-0.199712	0.84339	-0.0664535	-12.0591	0.970365	0.997413	0.996176
MoCA_impair_vs_normal	Xanthine	28	13	130.691	60.7509	0.566666	0.574491	0.160438	25.3275	0.874704	0.997413	0.996176
MoCA_impair_vs_normal	Indole-3-carboxylic acid	28	13	14.5495	5.90105	0.0608704	0.95205	0.0216234	4.39369	0.97588	0.997413	0.996176
MoCA_impair_vs_normal	N-carbamoyl-L-aspartate	28	13	-22.0947	-27.761	0.0508014	0.959891	0.0166813	-1.79704	0.987835	0.997413	0.996176
MoCA_impair_vs_normal	Uridine	28	13	15.8677	3.17704	0.219527	0.827702	0.0664789	13.9324	0.847102	0.997413	0.996176
MoCA_impair_vs_normal	Xanthosine	28	13	64.4911	49.5343	0.0802475	0.936886	0.0296834	-18.1619	0.913454	0.997413	0.996176
MoCA_impair_vs_normal	11,12-DiHETrE	28	13	-21.7895	3.60416	-0.0905491	0.928562	-0.0294604	-19.5517	0.945036	0.997413	0.996176
MoCA_impair_vs_normal	Plasmalogen(p16:0/20:4)	25	13	-266.061	-200.908	-0.58751	0.564108	-0.225582	7.60714	0.933775	0.997413	0.996176
MoCA_impair_vs_normal	PI(36:1)	13	7	-51.6064	-31.1408	-0.424112	0.678014	-0.19135	7.9821	0.903169	0.997413	0.996176
MoCA_impair_vs_normal	Gluconolactone	28	12	-2.81916	-14.603	0.250307	0.804484	0.0814723	5.86391	0.913652	0.997413	0.996176
MoCA_impair_vs_normal	Nicotinamide Riboside	17	6	20.7289	20.3855	0.00333962	0.997413	0.00162354	-0.338116	0.9976	0.997413	0.9976
Onset_early_vs_late	Urea	20	21	-398.5	78.5497	-2.19685	0.0346662	-0.680134	-342.452	0.142539	0.294711	0.587522
Onset_early_vs_late	Trimethylamine-N-oxide	20	21	-44.3765	72.2879	-1.24334	0.221165	-0.38814	-129.699	0.148989	0.415596	0.587522
Onset_early_vs_late	Dimethylglycine	20	21	-822.65	77.3038	-1.92698	0.0646199	-0.591474	-788.574	0.103448	0.294711	0.587522
Onset_early_vs_late	3-Aminoisobutyric acid	20	21	-78.7884	67.8743	-1.28906	0.20506	-0.403349	-141.63	0.259938	0.393991	0.587522
Onset_early_vs_late	L-Serine	20	21	-681.879	772.088	-1.72394	0.0926429	-0.538291	-1200.3	0.184943	0.294711	0.587522
Onset_early_vs_late	Hypotaurine	20	21	17.3813	-187.684	1.34527	0.187626	0.415525	230.281	0.135313	0.393212	0.587522
Onset_early_vs_late	Guanidinoacetic acid	20	21	-4460.52	568.673	-1.87816	0.0687365	-0.581124	-3974.47	0.158876	0.294711	0.587522
Onset_early_vs_late	Indole	20	21	-369.444	-58.9068	-1.68842	0.0997131	-0.523946	-214.74	0.262594	0.294711	0.587522
Onset_early_vs_late	L-Valine	20	21	-980.363	188.972	-1.74582	0.0896435	-0.540176	-895.434	0.204539	0.294711	0.587522
Onset_early_vs_late	Threonine	20	21	-1755.89	461.455	-1.78329	0.0826239	-0.553765	-1931.06	0.152179	0.294711	0.587522
Onset_early_vs_late	Pipecolic acid	20	21	-2539.74	2909.06	-1.67771	0.101637	-0.525789	-4541.49	0.202734	0.294711	0.587522
Onset_early_vs_late	N-acetyl-L-alanine	20	21	-3171.7	90.09	-2.20492	0.0354995	-0.678279	-3024.1	0.065102	0.294711	0.587522
Onset_early_vs_late	Creatine	20	21	-3270.7	-47.7064	-2.0652	0.0474896	-0.636126	-2974.86	0.0831491	0.294711	0.587522
Onset_early_vs_late	L-leucine + L-Isoleucine	20	21	-4585.09	1397.42	-1.63098	0.111436	-0.505834	-4252.4	0.26859	0.302557	0.587522
Onset_early_vs_late	Homocysteine	20	21	54.8157	-91.2484	1.30754	0.200363	0.412887	150.774	0.21605	0.393991	0.587522
Onset_early_vs_late	Adenine	20	21	-195.01	50.8083	-2.02888	0.0494172	-0.631419	-195.167	0.148593	0.294711	0.587522
Onset_early_vs_late	L-Glutamine	20	21	-3061.9	3501.77	-1.57104	0.12434	-0.491537	-5482.87	0.230763	0.317345	0.587522
Onset_early_vs_late	L-Histidine	20	21	536.454	-768.776	2.54343	0.0151189	0.791272	990.029	0.0816587	0.294711	0.587522
Onset_early_vs_late	DL-2-Aminooctanoic acid	20	21	-273.082	294.751	-2.11835	0.0406973	-0.663347	-420.187	0.141763	0.294711	0.587522
Onset_early_vs_late	7-methylguanine	20	21	-87.8645	126.069	-1.51119	0.138983	-0.473344	-173.187	0.258223	0.328813	0.587522
Onset_early_vs_late	Methionine sulfoxide	20	21	-210.973	-21.7633	-1.6888	0.099305	-0.525799	-159.362	0.189912	0.294711	0.587522
Onset_early_vs_late	N-Acetylornithine	20	21	-281.801	414.554	-2.93411	0.00599981	-0.906456	-601.055	0.0238977	0.294711	0.587522
Onset_early_vs_late	Citrulline	20	21	-1735.45	1269.57	-2.25529	0.030225	-0.699089	-2495.01	0.0868912	0.294711	0.587522
Onset_early_vs_late	Serotonin	20	21	-295.564	211.177	-1.99444	0.0533935	-0.619381	-410.313	0.136773	0.294711	0.587522
Onset_early_vs_late	L-Tyrosine	20	21	-1128.91	177.554	-2.08763	0.0437027	-0.648081	-1032.67	0.126808	0.294711	0.587522
Onset_early_vs_late	Normetanephrine	20	21	160.939	-295.632	1.80451	0.0792908	0.559877	356.736	0.195371	0.294711	0.587522
Onset_early_vs_late	N-acetyl-glutamate	20	21	-1721.1	1763.38	-2.33284	0.0254064	-0.72253	-3237.75	0.0524777	0.294711	0.587522
Onset_early_vs_late	L-Tryptophan	20	21	-2253.36	-146.65	-1.78486	0.0828432	-0.55262	-1499.48	0.222763	0.294711	0.587522
Onset_early_vs_late	Butyrylcarnitine	20	21	-72.655	-400.709	0.648805	0.522512	0.206474	563.793	0.259718	0.642802	0.587522
Onset_early_vs_late	Tiglylcarnitine	20	21	-393.26	461.205	-2.0452	0.0476378	-0.637499	-686.215	0.132477	0.294711	0.587522
Onset_early_vs_late	Isovalerylcarnitine	20	21	-594.318	285.983	-2.25	0.0307246	-0.696772	-656.558	0.127319	0.294711	0.587522
Onset_early_vs_late	Malonylcarnitine	20	21	-124.91	56.4163	-1.41048	0.167111	-0.436708	-160.959	0.256273	0.368191	0.587522
Onset_early_vs_late	3-Hydroxyisovaleryl carnitine	20	21	-168.883	92.3687	-1.70328	0.0989907	-0.524193	-186.991	0.236222	0.294711	0.587522
Onset_early_vs_late	1-Methyladenosine	20	21	-102.95	130.785	-2.20498	0.0336076	-0.685074	-187.605	0.102782	0.294711	0.587522
Onset_early_vs_late	7-Methylguanosine	20	21	-26.9978	128.023	-1.83266	0.0747163	-0.569477	-125.511	0.182364	0.294711	0.587522
Onset_early_vs_late	5-Methylthioadenosine	20	21	-248.226	-136.758	-2.10252	0.0421945	-0.653399	-78.3466	0.164493	0.294711	0.587522
Onset_early_vs_late	3-Hydroxydodecanoylcarnitine	18	20	-69.8886	81.5672	-1.8059	0.0793224	-0.58488	-117.396	0.19015	0.294711	0.587522
Onset_early_vs_late	Ceramide(d18:1/12:0)	19	20	60.9163	-66.8751	3.243	0.00266172	1.04595	112.335	0.0136403	0.294711	0.587522
Onset_early_vs_late	Dephospho-CoA	20	21	47.8099	-32.5055	2.10575	0.0419178	0.659995	65.7166	0.120718	0.294711	0.587522
Onset_early_vs_late	PC(16:0/18:2)	20	21	-298.53	-896.401	2.20637	0.0338136	0.693459	494.968	0.0737564	0.294711	0.587522
Onset_early_vs_late	BMP(18:1/16:0)	9	8	6.75323	-44.9899	0.779251	0.448786	0.369697	98.2937	0.26509	0.568462	0.587522
Onset_early_vs_late	Agmatine	14	20	130.123	-81.3349	1.87049	0.0705948	0.608363	172.144	0.209766	0.294711	0.587522
Onset_early_vs_late	Hydroxykynurenine	20	21	126.95	-181.164	2.36404	0.0233988	0.73375	283.871	0.0618655	0.294711	0.587522
Onset_early_vs_late	N-acetyl spermine	20	21	-530.622	766.296	-2.46074	0.0187567	-0.762661	-1123.03	0.052708	0.294711	0.587522
Onset_early_vs_late	Nicotinamide Riboside	9	14	-72.224	80.3371	-2.0186	0.0564992	-0.776004	-142.074	0.175817	0.294711	0.587522
Onset_early_vs_late	9-Decenoylcarnitine	20	21	-606.587	274.311	-1.67668	0.101823	-0.521061	-689.276	0.24068	0.294711	0.587522
Onset_early_vs_late	Decanoylcarnitine	20	21	-367.58	416.9	-1.92905	0.0643398	-0.592125	-647.459	0.139614	0.294711	0.587522
Onset_early_vs_late	Aspartylglycosamine	19	20	-61.8021	75.2349	-1.96482	0.0586065	-0.621083	-127.34	0.0964756	0.294711	0.587522
Onset_early_vs_late	Myristoylcarnitine	20	21	256.449	-189.056	2.5837	0.0143379	0.814647	415.545	0.0239459	0.294711	0.587522
Onset_early_vs_late	Leucine+isoleucine	20	21	-4944.74	1488.13	-1.71146	0.0953392	-0.531092	-4753.35	0.226235	0.294711	0.587522
Onset_early_vs_late	Tyrosine	20	21	-1389.58	108.326	-1.99974	0.0527279	-0.621418	-1180.67	0.1441	0.294711	0.587522
Onset_early_vs_late	Tryptophan	20	21	-485.993	-93.6068	-1.71553	0.0952635	-0.530466	-265.738	0.269595	0.294711	0.587522
Onset_early_vs_late	Lysine	20	21	-3520.12	3949.89	-1.66776	0.103408	-0.521252	-6322.78	0.198023	0.294711	0.587522
Onset_early_vs_late	Riboflavin	20	21	50.6382	-90.3428	1.5613	0.129887	0.495259	170.253	0.0954284	0.326629	0.587522
Onset_early_vs_late	Glutamic acid	20	21	-224.985	465.463	-1.8713	0.0707733	-0.576663	-511.059	0.206613	0.294711	0.587522
Onset_early_vs_late	Glycine	20	21	-189.158	252.112	-1.50694	0.14037	-0.473159	-352.953	0.271428	0.328813	0.587522
Onset_early_vs_late	Asparagine	20	21	-695.291	-24.946	-2.91175	0.00817387	-0.888953	-616.697	0.0206201	0.294711	0.587522
Onset_early_vs_late	L-Lactic acid	20	20	-382.889	897.727	-1.8536	0.0734301	-0.58616	-1177.83	0.12067	0.294711	0.587522
Onset_early_vs_late	Malonic acid	19	19	-441.577	329.873	-2.24433	0.0358584	-0.728157	-672.027	0.0712565	0.294711	0.587522
Onset_early_vs_late	Itaconic acid	20	21	-71.1285	70.4603	-1.66843	0.103335	-0.519231	-123.61	0.197031	0.294711	0.587522
Onset_early_vs_late	Citraconic acid	20	21	-82.2619	92.155	-1.67951	0.10184	-0.520018	-144.477	0.217761	0.294711	0.587522
Onset_early_vs_late	Oxaloacetic acid	20	21	-118.716	153.022	-1.48647	0.145228	-0.464612	-233.236	0.235519	0.335595	0.587522
Onset_early_vs_late	Mevalonic acid	11	17	-46.9605	8.95762	-1.77367	0.0879184	-0.614739	-47.3916	0.175687	0.294711	0.587522
Onset_early_vs_late	3-methylphenylacetic acid	20	21	-241.617	213.786	-1.72807	0.0919179	-0.538406	-380.357	0.191432	0.294711	0.587522
Onset_early_vs_late	Orotic acid	20	20	-208.859	187.281	-2.19775	0.0356044	-0.69499	-365.218	0.0759009	0.294711	0.587522
Onset_early_vs_late	Allantoin	7	9	-44.672	4.60524	-0.976278	0.345616	-0.469941	-59.3221	0.216816	0.490582	0.587522
Onset_early_vs_late	Indole-3-carboxylic acid	20	21	-102.089	120.28	-1.8664	0.0697297	-0.579993	-188.895	0.159059	0.294711	0.587522
Onset_early_vs_late	Homogentisic acid	20	21	-314.583	205.62	-1.61385	0.114668	-0.502674	-395.202	0.243275	0.302557	0.587522
Onset_early_vs_late	Uric acid	20	21	-2519.7	1573.78	-1.58371	0.121461	-0.49266	-3101.09	0.250272	0.314696	0.587522
Onset_early_vs_late	p-Aminohippuric acid	19	21	107.071	-148.516	1.78674	0.0822251	0.568044	174.895	0.25567	0.294711	0.587522
Onset_early_vs_late	Xanthurenic acid	17	20	62.9563	-115.149	1.76123	0.0872822	0.582581	122.113	0.201465	0.294711	0.587522
Onset_early_vs_late	Xanthosine	20	21	-78.2732	191.198	-1.79681	0.0809972	-0.556031	-174.044	0.261783	0.294711	0.587522
Onset_early_vs_late	Eicosapentaenoic acid	20	20	-90.6184	43.0387	-1.16993	0.254594	-0.369964	-163.683	0.199169	0.443106	0.587522
Onset_early_vs_late	11,12-DiHETrE	20	21	-260.921	221.675	-1.8801	0.0677649	-0.584397	-347.543	0.185043	0.294711	0.587522
Onset_early_vs_late	PI(36:4)	18	14	102.552	-134.879	1.66094	0.112877	0.527009	252.139	0.161337	0.302557	0.587522
Onset_early_vs_late	PI(36:2)	16	11	-14.6872	-120.667	1.99047	0.0580943	0.700803	85.4069	0.212868	0.294711	0.587522
Onset_early_vs_late	PI(38:4)	20	20	-31.4696	-432.802	1.80961	0.0793942	0.572248	447.524	0.0636287	0.294711	0.587522
Onset_early_vs_late	PI(38:3)	19	16	-40.6614	-165.198	1.27405	0.212289	0.415428	138.678	0.197456	0.403349	0.587522
Onset_early_vs_late	PI(40:5)	14	9	-7.61841	-16.3532	0.154538	0.879068	0.0669444	78.9803	0.248681	0.917243	0.587522
Onset_early_vs_late	L-Lysine	20	21	-2956.1	3434.55	-1.40254	0.168923	-0.439664	-5287.89	0.288832	0.368191	0.602321
Onset_early_vs_late	Acetyllysine	20	21	-317.967	61.5318	-1.6287	0.111438	-0.507825	-253.852	0.287842	0.302557	0.602321
Onset_early_vs_late	Phosphorylcholine	18	14	-471.009	-679.812	0.62063	0.539657	0.218465	348.809	0.288726	0.656424	0.602321
Onset_early_vs_late	Oleoylcarnitine	16	10	367.505	-138.663	1.03082	0.318946	0.32602	912.9	0.292873	0.481758	0.603389
Onset_early_vs_late	Suberylcarnitine	18	21	289.246	-64.3641	0.821412	0.422729	0.285503	446.228	0.301042	0.547627	0.605626
Onset_early_vs_late	Orotidine monophosphate	12	12	14.1194	-23.8045	0.908991	0.373774	0.371094	48.7275	0.297764	0.503271	0.605626
Onset_early_vs_late	beta-Alanine	20	21	-161.394	259.859	-1.40664	0.167701	-0.440901	-327.26	0.312444	0.368191	0.615415
Onset_early_vs_late	Suberic Acid	20	21	481.815	-254.526	0.982787	0.337671	0.314577	801.188	0.313106	0.489337	0.615415
Onset_early_vs_late	Saccharopine	17	18	-60.7234	3.90201	-1.34315	0.188403	-0.454	-53.8881	0.32576	0.393212	0.633011
Onset_early_vs_late	Hydroxyproline	20	21	-470.761	44.4461	-1.61232	0.115007	-0.502138	-341.729	0.331544	0.302557	0.637012
Onset_early_vs_late	L-Carnitine	20	21	-1954	569.635	-1.42851	0.161305	-0.444013	-1726.62	0.342614	0.367775	0.639935
Onset_early_vs_late	S-adenosyl-L-homoCysteine	20	21	-9.74696	106.466	-1.77739	0.083387	-0.55321	-62.9443	0.343403	0.294711	0.639935
Onset_early_vs_late	Aspartic acid	20	21	-240.409	296.193	-1.51697	0.138738	-0.478383	-357.777	0.344293	0.328813	0.639935
Onset_early_vs_late	L-Methionine	20	21	-845.326	168.665	-1.29259	0.203859	-0.404521	-744.583	0.361325	0.393991	0.651598
Onset_early_vs_late	Homoarginine	20	21	-283.073	-45.9614	-1.39774	0.1701	-0.435791	-151.036	0.406045	0.368191	0.651598
Onset_early_vs_late	Cystine	20	21	-339.778	354.648	-1.34	0.188558	-0.420978	-476.674	0.396946	0.393212	0.651598
Onset_early_vs_late	2-Octenoylcarnitine	20	21	-327.244	-149.349	-1.08933	0.284583	-0.335485	-159.247	0.398379	0.467919	0.651598
Onset_early_vs_late	Dodecenoylcarnitine	19	19	-74.9792	97.1416	-1.30413	0.200483	-0.423116	-133.864	0.368235	0.393991	0.651598
Onset_early_vs_late	2-Arachidonylglycerol	15	11	50.939	-18.2377	0.354611	0.727584	0.121628	232.438	0.421982	0.829446	0.651598
Onset_early_vs_late	Histidine	20	21	-111.518	57.2246	-1.06661	0.292854	-0.334084	-133.968	0.417727	0.476234	0.651598
Onset_early_vs_late	Arginine	20	21	-117.245	127.216	-1.30024	0.201437	-0.407726	-180.819	0.365224	0.393991	0.651598
Onset_early_vs_late	Methionine	20	21	-617.609	72.0449	-1.15927	0.253522	-0.362983	-492.8	0.422967	0.443106	0.651598
Onset_early_vs_late	Nicotinic acid	20	21	-49.4344	-21.4702	-0.9119	0.367872	-0.282564	-28.4614	0.382834	0.499255	0.651598
Onset_early_vs_late	Glyceric acid	20	21	14.6571	-22.9278	1.00001	0.324396	0.315126	32.7795	0.420707	0.482362	0.651598
Onset_early_vs_late	a-ketoglutarate.1	20	21	67.9137	-76.1843	1.17353	0.248374	0.369051	115.513	0.389537	0.443106	0.651598
Onset_early_vs_late	2-Hydroxyglutarate	20	21	78.7954	-15.9034	1.00651	0.321172	0.316941	86.5759	0.393044	0.481758	0.651598
Onset_early_vs_late	Ascorbic acid	20	21	-157.542	163.424	-1.17548	0.247004	-0.367758	-242.296	0.41912	0.443106	0.651598
Onset_early_vs_late	N-carbamoyl-L-aspartate	20	21	-71.0644	21.0354	-0.879717	0.384462	-0.273786	-93.9218	0.392378	0.513618	0.651598
Onset_early_vs_late	Hexose Disaccharide Pool	15	19	-270.822	163.428	-1.17146	0.256535	-0.358689	-363.151	0.420984	0.443106	0.651598
Onset_early_vs_late	Plasmalogen(p16:0/20:4)	19	19	-187.326	-300.217	1.2221	0.230774	0.396503	73.2517	0.391498	0.424326	0.651598
Onset_early_vs_late	PI(36:1)	12	8	-21.0672	-79.5077	1.32578	0.201677	0.566712	58.0344	0.378162	0.393991	0.651598
Onset_early_vs_late	PI(38:5)	13	11	24.9576	-81.009	1.55369	0.136002	0.610493	78.9135	0.360447	0.328813	0.651598
Onset_early_vs_late	Anandamide	20	21	-22.7642	92.8614	-1.11625	0.271146	-0.348199	-86.9929	0.440599	0.454568	0.660898
Onset_early_vs_late	Vitamin K2	12	17	53.3603	-2.30523	0.491905	0.630663	0.211249	82.8256	0.434995	0.742519	0.660898
Onset_early_vs_late	glucose-1-phosphate	20	21	-54.4242	119.469	-1.22284	0.228812	-0.380572	-122.839	0.437473	0.424326	0.660898
Onset_early_vs_late	L-Palmitoylcarnitine	15	8	260.575	-104.202	1.05478	0.309351	0.333688	511.447	0.455472	0.480901	0.677267
Onset_early_vs_late	Histamine	14	18	-25.8741	48.2774	-0.918961	0.365465	-0.318897	-71.786	0.465154	0.499255	0.680457
Onset_early_vs_late	Cholesterol	18	14	-113.925	-234.304	0.945594	0.352178	0.333866	110.298	0.465576	0.493626	0.680457
Onset_early_vs_late	Glycerophosphocholine	20	21	-1111.47	2763.85	-1.52479	0.135423	-0.476683	-1923.18	0.473735	0.328813	0.680745
Onset_early_vs_late	L-Threonine	20	21	-78.4697	-288.468	1.03987	0.304833	0.325047	155.063	0.472771	0.478224	0.680745
Onset_early_vs_late	L-Glutamic acid	20	21	-262.173	315.086	-0.925999	0.360279	-0.290086	-455.446	0.500844	0.499255	0.712397
Onset_early_vs_late	3-Hydroxy-cis-5-tetradecenoylcarnitine	18	18	74.9899	-15.0546	0.724662	0.478425	0.241554	90.5592	0.50826	0.592832	0.712397
Onset_early_vs_late	24,25-Dihydrolanosterol	20	21	-36.8677	58.2211	-0.273576	0.785911	-0.0849489	-253.078	0.505453	0.867038	0.712397
Onset_early_vs_late	Methylguanidine	19	21	-56.2208	-232.241	0.817438	0.418821	0.256213	151.596	0.536549	0.547627	0.72444
Onset_early_vs_late	Alanine	20	21	-1353.46	365.016	-1.04596	0.302345	-0.328239	-1102.89	0.529214	0.478224	0.72444
Onset_early_vs_late	Pyruvic acid	20	21	-169.936	-110.545	-0.334578	0.739738	-0.104317	-105.308	0.525613	0.837717	0.72444
Onset_early_vs_late	a-ketoglutarate	20	21	147.086	-42.8734	1.00592	0.321147	0.316134	124.999	0.542271	0.481758	0.72444
Onset_early_vs_late	Pantothenic acid	20	21	-7.43061	-114.266	1.01836	0.314811	0.318304	69.5606	0.539997	0.481758	0.72444
Onset_early_vs_late	Gluconolactone	19	21	-33.7153	18.4008	-1.16018	0.253229	-0.366351	-31.1598	0.531345	0.443106	0.72444
Onset_early_vs_late	Sarcosine	20	21	-1298.19	279.134	-0.954668	0.346108	-0.300065	-978.527	0.578211	0.490582	0.737867
Onset_early_vs_late	Methylcysteine	20	21	-241.781	463.052	-1.05603	0.297994	-0.331943	-402.63	0.576226	0.476234	0.737867
Onset_early_vs_late	1-Methylnicotinamide	20	21	14.6435	361.45	-1.10121	0.281796	-0.336994	-197.761	0.568873	0.467836	0.737867
Onset_early_vs_late	O-Phosphoethanolamine	18	19	-4.90525	46.5151	-1.06133	0.296345	-0.345945	-32.5882	0.557862	0.476234	0.737867
Onset_early_vs_late	Acetylcholine	20	21	-37.7249	305.309	-0.7914	0.433729	-0.248327	-245.675	0.568739	0.55349	0.737867
Onset_early_vs_late	5-Hydroxyindoleacetic acid	20	21	-68.1084	-58.428	-0.0794719	0.937089	-0.024645	72.3783	0.570564	0.942602	0.737867
Onset_early_vs_late	Zymosterol	20	21	173.104	84.4797	0.208865	0.83567	0.0654474	-224.186	0.593502	0.904428	0.746697
Onset_early_vs_late	Linoleylcarnitine	13	8	546.415	-201.491	1.01457	0.330329	0.354083	637.087	0.593865	0.48444	0.746697
Onset_early_vs_late	L-Acetylcarnitine	20	21	-1053.65	505.19	-0.951905	0.347137	-0.298153	-837.764	0.628251	0.490582	0.779295
Onset_early_vs_late	L-Kynurenine	20	21	-208.637	-31.3625	-0.984286	0.331459	-0.305149	-91.6927	0.633462	0.48444	0.779295
Onset_early_vs_late	Ketoleucine	20	21	-38.6801	48.1678	-0.847124	0.40221	-0.263364	-54.1247	0.63062	0.533162	0.779295
Onset_early_vs_late	Cytidine monophosphate	16	20	-4.94224	41.7784	-1.29623	0.203669	-0.426985	-17.3892	0.640197	0.393991	0.781955
Onset_early_vs_late	Propionylcarnitine	20	21	-469.582	146.08	-1.12593	0.26708	-0.351156	-256.286	0.645508	0.452185	0.78285
Onset_early_vs_late	Phenylpropiolic acid	20	21	128.986	-77.3219	0.731771	0.468917	0.229684	132.212	0.663261	0.589595	0.787622
Onset_early_vs_late	Xanthine	20	21	128.082	89.879	0.277383	0.783202	0.0874673	67.0141	0.655623	0.867038	0.787622
Onset_early_vs_late	Pseudouridine	20	21	17.9994	7.46061	0.181999	0.856561	0.057068	27.9344	0.659905	0.915449	0.787622
Onset_early_vs_late	Octanoylcarnitine	20	21	-136.366	-77.402	-0.171814	0.864499	-0.0538494	-144.446	0.673617	0.917243	0.788963
Onset_early_vs_late	2-Keto-L-gluconate	13	17	-61.1468	119.946	-1.16811	0.259743	-0.375097	-84.1755	0.670551	0.444161	0.788963
Onset_early_vs_late	L-Proline	20	21	-1524.62	-239.694	-0.378186	0.707628	-0.119129	1295.27	0.715863	0.817598	0.816368
Onset_early_vs_late	Adipoylcarnitine	20	20	29.3605	-6.25131	0.153226	0.879695	0.0484543	95.152	0.716112	0.917243	0.816368
Onset_early_vs_late	Taurine	20	21	571.971	219.687	0.407888	0.685771	0.126376	358.244	0.704697	0.797733	0.816368
Onset_early_vs_late	Cinnamoylglycine	17	14	-8.17228	-11.9588	0.0266257	0.979015	0.0100621	-56.1693	0.711881	0.979015	0.816368
Onset_early_vs_late	Hypoxanthine	20	21	356.508	66.702	0.81406	0.42228	0.257875	127.505	0.721624	0.547627	0.817204
Onset_early_vs_late	Dodecanoylcarnitine	17	18	92.6089	68.2803	0.0852961	0.932967	0.0296002	108.233	0.733948	0.942602	0.818873
Onset_early_vs_late	Guanidoacetic acid	13	16	-3.1734	6.90241	-0.278959	0.783037	-0.108108	-11.1931	0.737465	0.867038	0.818873
Onset_early_vs_late	Quinolinic Acid	16	17	11.2769	3.69835	0.155652	0.87754	0.0549247	19.3772	0.736425	0.917243	0.818873
Onset_early_vs_late	Pimelylcarnitine	20	20	-111.946	61.7233	-0.528961	0.599967	-0.167272	-108.815	0.761041	0.71246	0.8396
Onset_early_vs_late	Ornithine	20	21	-80.6607	28.5294	-0.922358	0.362498	-0.289953	-36.5075	0.767249	0.499255	0.841023
Onset_early_vs_late	3-Hydroxyhexanoylcarnitine	20	21	63.2185	17.468	0.358174	0.722217	0.112312	39.7424	0.77506	0.828853	0.842314
Onset_early_vs_late	Azelaic acid	18	20	892.887	533.893	0.200336	0.842684	0.0667026	535.236	0.778278	0.906283	0.842314
Onset_early_vs_late	Hexanoylcarnitine	20	21	-5.20458	211.41	-0.571753	0.570942	-0.179445	-100.03	0.812359	0.682734	0.87367
Onset_early_vs_late	1-Methylhistidine	20	21	-80.7791	60.7568	-0.61647	0.541262	-0.19316	-54.8252	0.823514	0.656424	0.880131
Onset_early_vs_late	N-acetyl-glutamine	20	21	-103.643	153.587	-0.801713	0.427732	-0.2513	-68.0279	0.834493	0.549941	0.886325
Onset_early_vs_late	Inosine	18	20	30.382	104.963	-0.480714	0.633964	-0.152517	-27.1185	0.871767	0.742519	0.920198
Onset_early_vs_late	Creatinine	20	21	-101.841	245.916	-0.603785	0.549666	-0.18734	-73.3823	0.904201	0.661922	0.940788
Onset_early_vs_late	Betaine	20	19	-69.0626	13.5653	-0.72479	0.473876	-0.229455	-16.0785	0.900442	0.591481	0.940788
Onset_early_vs_late	L-Glutarylcarnitine	20	21	31.4162	58.0681	-0.123671	0.902269	-0.0388858	-23.847	0.918781	0.929445	0.940788
Onset_early_vs_late	Pyroglutamic acid	20	19	11.9219	8.32213	0.0911954	0.92786	0.028986	4.73616	0.911262	0.942602	0.940788
Onset_early_vs_late	Indoleacrylic acid	20	21	-44.7702	-32.1474	-0.238717	0.812644	-0.0740563	6.27779	0.914887	0.890783	0.940788
Onset_early_vs_late	Uridine	20	21	8.97484	14.5762	-0.0938506	0.92571	-0.0293309	-5.89404	0.930626	0.942602	0.947245
Onset_early_vs_late	Purine	20	21	-93.2927	-81.3765	-0.135416	0.893081	-0.0426661	7.37179	0.938666	0.925557	0.949774
Onset_early_vs_late	L-Phenylalanine	20	21	-559.141	-360.958	-0.220522	0.826717	-0.0693322	32.0264	0.973577	0.900437	0.976605
Onset_early_vs_late	Dimethyl-L-arginine	20	21	29.9008	64.5922	-0.28455	0.777497	-0.0888787	3.90148	0.976605	0.867038	0.976605
PANSS_high_vs_low	Urea	26	14	-133.471	-231.245	0.392704	0.697716	0.131118	48.9402	0.864381	0.999721	0.996611
PANSS_high_vs_low	Methylguanidine	26	13	-110.659	-204.119	0.450818	0.654983	0.133641	94.7231	0.750455	0.999721	0.996611
PANSS_high_vs_low	Trimethylamine-N-oxide	26	14	16.9152	25.1228	-0.0727113	0.94274	-0.0265544	17.8267	0.872143	0.999721	0.996611
PANSS_high_vs_low	Sarcosine	26	14	-1067.53	105.311	-0.610533	0.548266	-0.22365	-1018.36	0.627849	0.999721	0.996611
PANSS_high_vs_low	Alanine	26	14	-1036.08	79.9985	-0.585068	0.564863	-0.213414	-972.225	0.641796	0.999721	0.996611
PANSS_high_vs_low	beta-Alanine	26	14	29.5945	27.9441	0.00490051	0.99613	0.00168705	-7.86875	0.983921	0.999721	0.996611
PANSS_high_vs_low	Dimethylglycine	26	14	-366.667	-367.509	0.00153587	0.998787	0.00052293	142.247	0.81297	0.999721	0.996611
PANSS_high_vs_low	3-Aminoisobutyric acid	26	14	28.2679	-93.3284	1.01454	0.319191	0.33332	197.415	0.186349	0.999721	0.996611
PANSS_high_vs_low	L-Serine	26	14	60.0847	47.1853	0.0132125	0.989567	0.00454491	141.613	0.899155	0.999721	0.996611
PANSS_high_vs_low	Hypotaurine	26	14	32.327	-336.522	2.27726	0.0317353	0.777379	467	0.0100648	0.999721	0.996611
PANSS_high_vs_low	Histamine	21	10	4.94883	40.8331	-0.39468	0.697655	-0.15016	-45.0655	0.722369	0.999721	0.996611
PANSS_high_vs_low	Creatinine	26	14	35.3485	183.212	-0.252107	0.802574	-0.0783809	-475.939	0.520436	0.999721	0.996611
PANSS_high_vs_low	L-Proline	26	14	-477.583	-1716.16	0.300299	0.767227	0.113354	949.972	0.826712	0.999721	0.996611
PANSS_high_vs_low	Betaine	26	12	-15.1696	-74.2692	0.439207	0.665487	0.161878	10.395	0.946038	0.999721	0.996611
PANSS_high_vs_low	Guanidinoacetic acid	26	14	-1973.1	-2328.32	0.122373	0.90344	0.0393003	544.111	0.873805	0.999721	0.996611
PANSS_high_vs_low	Indole	26	14	-148.116	-409.585	1.61361	0.114898	0.452936	305.753	0.159341	0.999721	0.996611
PANSS_high_vs_low	L-Valine	26	14	-425.476	-458.64	0.0466363	0.963108	0.0147668	81.8677	0.923653	0.999721	0.996611
PANSS_high_vs_low	Threonine	26	14	-629.185	-683.414	0.0385401	0.96955	0.0128731	339.795	0.838413	0.999721	0.996611
PANSS_high_vs_low	Purine	26	14	-64.9669	-148.705	0.816774	0.423836	0.303252	144.813	0.202085	0.999721	0.996611
PANSS_high_vs_low	Pipecolic acid	26	14	130.011	-305.851	0.118694	0.906491	0.0406539	566.19	0.895851	0.999721	0.996611
PANSS_high_vs_low	N-acetyl-L-alanine	26	14	-1335.97	-1968.94	0.369741	0.714535	0.123264	1310.24	0.521304	0.999721	0.996611
PANSS_high_vs_low	Creatine	26	14	-1454.38	-2059.64	0.339485	0.736892	0.11246	1327.29	0.533755	0.999721	0.996611
PANSS_high_vs_low	Hydroxyproline	26	14	-100.314	-473.319	1.10688	0.277451	0.356648	263.829	0.533728	0.999721	0.996611
PANSS_high_vs_low	L-leucine + L-Isoleucine	26	14	-1945.05	-1370.22	-0.137344	0.89187	-0.046782	-560.648	0.90457	0.999721	0.996611
PANSS_high_vs_low	Ornithine	26	14	2.6111	-91.9056	0.739864	0.466038	0.248044	-17.0793	0.908285	0.999721	0.996611
PANSS_high_vs_low	Methylcysteine	26	14	196.148	-194.343	0.532544	0.599189	0.182652	224.242	0.794138	0.999721	0.996611
PANSS_high_vs_low	Homocysteine	26	14	-39.4431	18.1783	-0.44885	0.657797	-0.157778	52.0271	0.728032	0.999721	0.996611
PANSS_high_vs_low	Adenine	26	14	-63.1677	-136.069	0.561108	0.579379	0.185756	81.0763	0.607196	0.999721	0.996611
PANSS_high_vs_low	1-Methylnicotinamide	26	14	350.601	-106.675	1.78446	0.0850258	0.442235	340.856	0.419249	0.999721	0.996611
PANSS_high_vs_low	O-Phosphoethanolamine	25	11	14.288	17.6624	-0.068511	0.945956	-0.0227693	10.7819	0.880353	0.999721	0.996611
PANSS_high_vs_low	Acetylcholine	26	14	88.8019	230.257	-0.29298	0.77202	-0.100392	-223.742	0.669298	0.999721	0.996611
PANSS_high_vs_low	L-Glutamine	26	14	-337.201	266.023	-0.128371	0.89892	-0.0441479	-432.659	0.937354	0.999721	0.996611
PANSS_high_vs_low	L-Lysine	26	14	-474.051	579.762	-0.201651	0.841999	-0.0710675	-652.177	0.913623	0.999721	0.996611
PANSS_high_vs_low	L-Glutamic acid	26	14	-94.1383	145.234	-0.348085	0.730738	-0.118839	-254.267	0.755177	0.999721	0.996611
PANSS_high_vs_low	L-Methionine	26	14	-456.044	-215.929	-0.256358	0.800207	-0.0933198	-60.0439	0.95171	0.999721	0.996611
PANSS_high_vs_low	L-Histidine	26	14	-120.582	-41.2668	-0.13334	0.894939	-0.0444511	540.742	0.435378	0.999721	0.996611
PANSS_high_vs_low	DL-2-Aminooctanoic acid	26	14	-27.6501	34.7644	-0.189408	0.851635	-0.069176	-77.2807	0.825797	0.999721	0.996611
PANSS_high_vs_low	L-Carnitine	26	14	-1014.51	-476.733	-0.291493	0.772679	-0.0927346	-865.722	0.688904	0.999721	0.996611
PANSS_high_vs_low	7-methylguanine	26	14	-21.6962	60.3908	-0.504333	0.618993	-0.178673	-81.3612	0.657421	0.999721	0.996611
PANSS_high_vs_low	Methionine sulfoxide	26	14	-138.812	-84.5499	-0.399247	0.693765	-0.144808	-2.85014	0.984806	0.999721	0.996611
PANSS_high_vs_low	L-Phenylalanine	26	14	-618.814	-270.94	-0.314086	0.757047	-0.120746	-221.849	0.849703	0.999721	0.996611
PANSS_high_vs_low	1-Methylhistidine	26	14	29.1819	-133.053	0.60389	0.552648	0.222003	-37.4446	0.898011	0.999721	0.996611
PANSS_high_vs_low	N-Acetylornithine	26	14	54.082	-23.6571	0.30039	0.76607	0.0975139	15.8278	0.959017	0.999721	0.996611
PANSS_high_vs_low	Citrulline	26	14	-60.8517	-753.846	0.501751	0.619073	0.151995	231.455	0.895981	0.999721	0.996611
PANSS_high_vs_low	Serotonin	26	14	-17.5709	-117.797	0.377069	0.70857	0.116366	16.7113	0.960261	0.999721	0.996611
PANSS_high_vs_low	Normetanephrine	26	14	-91.6378	-27.0168	-0.219243	0.828298	-0.0752702	-157.885	0.641819	0.999721	0.996611
PANSS_high_vs_low	Acetyllysine	26	14	-116.676	-197.182	0.312512	0.757151	0.104729	34.4687	0.903705	0.999721	0.996611
PANSS_high_vs_low	N-acetyl-glutamine	26	14	26.5844	-5.56964	0.0939731	0.925813	0.0308565	-227.354	0.559219	0.999721	0.996611
PANSS_high_vs_low	Homoarginine	26	14	-141.063	-300.089	1.02945	0.310538	0.312015	152.39	0.442631	0.999721	0.996611
PANSS_high_vs_low	N-acetyl-glutamate	26	14	-271.762	131.078	-0.234066	0.816865	-0.0798165	-206.966	0.91875	0.999721	0.996611
PANSS_high_vs_low	5-Hydroxyindoleacetic acid	26	14	-10.0192	-174.244	1.30185	0.203428	0.422484	43.1417	0.780011	0.999721	0.996611
PANSS_high_vs_low	Dimethyl-L-arginine	26	14	38.4862	85.7142	-0.324296	0.749137	-0.120418	19.9734	0.900975	0.999721	0.996611
PANSS_high_vs_low	L-Acetylcarnitine	26	14	16.7422	-864.228	0.435847	0.667928	0.165117	63.6044	0.975897	0.999721	0.996611
PANSS_high_vs_low	L-Tryptophan	26	14	-883.898	-2231.83	1.29799	0.202139	0.356985	1541.39	0.274244	0.999721	0.996611
PANSS_high_vs_low	L-Kynurenine	26	14	-49.9027	-285.963	1.46772	0.15041	0.409568	220.992	0.333526	0.999721	0.996611
PANSS_high_vs_low	Propionylcarnitine	26	14	-251.32	51.2785	-0.460466	0.650038	-0.168328	-358.115	0.597514	0.999721	0.996611
PANSS_high_vs_low	Butyrylcarnitine	26	14	-192.346	-283.096	0.150014	0.882315	0.0562155	240.778	0.69051	0.999721	0.996611
PANSS_high_vs_low	Cystine	26	14	125.682	-299.757	0.751731	0.459115	0.25365	539.891	0.426429	0.999721	0.996611
PANSS_high_vs_low	Tiglylcarnitine	26	14	-23.647	72.7776	-0.198883	0.844022	-0.0683944	-180.225	0.745679	0.999721	0.996611
PANSS_high_vs_low	Isovalerylcarnitine	26	14	-12.6175	-500.98	1.1994	0.23916	0.372316	472.225	0.364195	0.999721	0.996611
PANSS_high_vs_low	Malonylcarnitine	26	14	20.8214	-121.274	0.909503	0.373829	0.334416	75.8017	0.663373	0.999721	0.996611
PANSS_high_vs_low	Glycerophosphocholine	26	14	1922.28	-1750.27	1.57224	0.124321	0.451255	1824.22	0.566359	0.999721	0.996611
PANSS_high_vs_low	Hexanoylcarnitine	26	14	135.338	69.9294	0.14444	0.886601	0.0533134	-46.0712	0.928457	0.999721	0.996611
PANSS_high_vs_low	3-Hydroxyisovaleryl carnitine	26	14	-47.5295	-30.9207	-0.0772762	0.939389	-0.0318837	-53.5501	0.781372	0.999721	0.996611
PANSS_high_vs_low	3-Hydroxyhexanoylcarnitine	26	14	-22.8534	174.915	-1.24095	0.231798	-0.494994	-104.665	0.53034	0.999721	0.996611
PANSS_high_vs_low	L-Glutarylcarnitine	26	14	-77.3293	279.336	-1.28874	0.216256	-0.530747	-220.144	0.435924	0.999721	0.996611
PANSS_high_vs_low	Saccharopine	23	11	2.31818	-85.2268	2.07779	0.0459188	0.616377	96.2666	0.122205	0.999721	0.996611
PANSS_high_vs_low	1-Methyladenosine	26	14	-2.06481	14.011	-0.128305	0.899044	-0.0451797	-46.5898	0.733444	0.999721	0.996611
PANSS_high_vs_low	2-Octenoylcarnitine	26	14	-194.63	-439.042	1.94717	0.0589472	0.547795	311.67	0.100012	0.999721	0.996611
PANSS_high_vs_low	Adipoylcarnitine	26	13	-66.6907	179.484	-0.705163	0.493745	-0.334911	-197.272	0.528406	0.999721	0.996611
PANSS_high_vs_low	7-Methylguanosine	26	14	40.8448	71.7161	-0.30396	0.763983	-0.107626	-45.1056	0.697467	0.999721	0.996611
PANSS_high_vs_low	5-Methylthioadenosine	26	14	-211.616	-165.397	-0.6988	0.492799	-0.258746	-91.5521	0.17508	0.999721	0.996611
PANSS_high_vs_low	Pimelylcarnitine	26	13	54.992	-179.508	0.701142	0.488878	0.223364	126.244	0.769197	0.999721	0.996611
PANSS_high_vs_low	Suberylcarnitine	26	12	-93.3723	521.435	-0.955347	0.35989	-0.498032	-477.218	0.359601	0.999721	0.996611
PANSS_high_vs_low	Cytidine monophosphate	24	11	35.9118	-12.9249	1.27489	0.215422	0.439088	-36.9464	0.419264	0.999721	0.996611
PANSS_high_vs_low	Anandamide	26	14	39.7109	34.3887	0.046502	0.963266	0.0155804	22.277	0.87182	0.999721	0.996611
PANSS_high_vs_low	3-Hydroxydodecanoylcarnitine	25	12	-17.7101	-8.09755	-0.104243	0.918304	-0.0424785	1.96626	0.983722	0.999721	0.996611
PANSS_high_vs_low	S-adenosyl-L-homoCysteine	26	14	51.5413	54.3904	-0.0364239	0.971271	-0.0129236	-79.2516	0.327005	0.999721	0.996611
PANSS_high_vs_low	3-Hydroxy-cis-5-tetradecenoylcarnitine	23	12	-31.3124	146.07	-0.957432	0.358862	-0.477752	-130.902	0.421728	0.999721	0.996611
PANSS_high_vs_low	24,25-Dihydrolanosterol	26	14	85.8042	-74.8797	0.397242	0.695118	0.14266	145.247	0.752934	0.999721	0.996611
PANSS_high_vs_low	Ceramide(d18:1/12:0)	25	13	2.08398	-3.49707	0.12836	0.898721	0.0406943	39.6442	0.477828	0.999721	0.996611
PANSS_high_vs_low	Dephospho-CoA	26	14	2.30976	22.065	-0.499311	0.620887	-0.153502	36.0265	0.485945	0.999721	0.996611
PANSS_high_vs_low	PC(16:0/18:2)	26	14	-647.132	-521.603	-0.379138	0.708286	-0.135728	173.333	0.615099	0.999721	0.996611
PANSS_high_vs_low	BMP(18:1/16:0)	10	6	-31.7798	8.54875	-0.555379	0.588879	-0.276032	-96.168	0.407781	0.999721	0.996611
PANSS_high_vs_low	Agmatine	21	12	23.1775	-11.3044	0.290331	0.773538	0.0936993	97.4425	0.605711	0.999721	0.996611
PANSS_high_vs_low	Phosphorylcholine	22	9	-721.268	-157.743	-1.29516	0.221174	-0.598633	-319.093	0.412973	0.999721	0.996611
PANSS_high_vs_low	Hydroxykynurenine	26	14	-65.8791	57.9344	-0.83355	0.411965	-0.276922	-69.9152	0.709875	0.999721	0.996611
PANSS_high_vs_low	N-acetyl spermine	26	14	5.5409	165.904	-0.257363	0.799169	-0.0897652	-279.326	0.687778	0.999721	0.996611
PANSS_high_vs_low	Nicotinamide Riboside	18	5	1.51838	89.4746	-0.826287	0.438751	-0.422783	-210.847	0.201261	0.999721	0.996611
PANSS_high_vs_low	Octanoylcarnitine	26	14	148.099	-541.453	2.14987	0.038841	0.654374	677.586	0.0981812	0.999721	0.996611
PANSS_high_vs_low	9-Decenoylcarnitine	26	14	32.8424	-520.154	1.00778	0.321288	0.315713	376.4	0.601686	0.999721	0.996611
PANSS_high_vs_low	Decanoylcarnitine	26	14	210.344	-324.689	1.4443	0.157046	0.388828	411.052	0.446299	0.999721	0.996611
PANSS_high_vs_low	Aspartylglycosamine	24	14	20.5402	-38.7519	0.881899	0.383739	0.264321	63.6765	0.478037	0.999721	0.996611
PANSS_high_vs_low	Dodecenoylcarnitine	24	13	-7.1812	-7.00763	-0.0011305	0.99911	-0.000427374	25.7507	0.878468	0.999721	0.996611
PANSS_high_vs_low	Dodecanoylcarnitine	23	11	-26.3322	276.925	-0.709091	0.493858	-0.369704	-201.138	0.598865	0.999721	0.996611
PANSS_high_vs_low	Cholesterol	20	11	-190.792	-111.02	-0.542877	0.594053	-0.216084	-28.3959	0.858776	0.999721	0.996611
PANSS_high_vs_low	Myristoylcarnitine	26	14	28.5401	69.6623	-0.199594	0.843527	-0.0694353	-36.4872	0.872072	0.999721	0.996611
PANSS_high_vs_low	2-Arachidonylglycerol	16	9	-74.7508	177.668	-0.806237	0.442465	-0.444801	-205.654	0.498873	0.999721	0.996611
PANSS_high_vs_low	Zymosterol	26	14	71.0388	269.87	-0.377489	0.710226	-0.145503	157.336	0.757911	0.999721	0.996611
PANSS_high_vs_low	L-Palmitoylcarnitine	15	7	-99.0236	669.427	-1.04098	0.337989	-0.718133	-302.057	0.696803	0.999721	0.996611
PANSS_high_vs_low	Linoleylcarnitine	13	8	-197.455	1007.3	-1.00577	0.348017	-0.585838	-462.51	0.734534	0.999721	0.996611
PANSS_high_vs_low	Oleoylcarnitine	18	7	-136.01	1012.25	-1.02546	0.344698	-0.758734	-1042.18	0.25225	0.999721	0.996611
PANSS_high_vs_low	Vitamin K2	19	9	-45.0371	138.236	-1.36015	0.206047	-0.726803	-154.384	0.214269	0.999721	0.996611
PANSS_high_vs_low	Leucine+isoleucine	26	14	-2284.59	-1230.85	-0.239765	0.812626	-0.0837223	-753.8	0.874555	0.999721	0.996611
PANSS_high_vs_low	Histidine	26	14	-55.9554	-16.9615	-0.232084	0.818245	-0.0770165	-19.1525	0.92199	0.999721	0.996611
PANSS_high_vs_low	Tyrosine	26	14	-752.09	-616.562	-0.159532	0.874529	-0.0541181	-100.718	0.917539	0.999721	0.996611
PANSS_high_vs_low	Tryptophan	26	14	-219.483	-521.827	1.59459	0.119514	0.422903	306.121	0.254421	0.999721	0.996611
PANSS_high_vs_low	Arginine	26	14	-42.0287	86.6573	-0.60543	0.550593	-0.208748	-120.573	0.621328	0.999721	0.996611
PANSS_high_vs_low	Methionine	26	14	-417.879	-72.4541	-0.481939	0.63511	-0.178172	-185.655	0.803829	0.999721	0.996611
PANSS_high_vs_low	Lysine	26	14	-321.642	216.765	-0.105108	0.917184	-0.0365134	-355.261	0.952186	0.999721	0.996611
PANSS_high_vs_low	Riboflavin	26	14	20.3166	-78.7615	1.10363	0.277934	0.342	105.62	0.397407	0.999721	0.996611
PANSS_high_vs_low	Aspartic acid	26	14	-53.3857	195.86	-0.532106	0.601806	-0.214196	-327.275	0.479112	0.999721	0.996611
PANSS_high_vs_low	Glycine	26	14	-22.3835	112.825	-0.375757	0.711143	-0.139858	-77.9481	0.843189	0.999721	0.996611
PANSS_high_vs_low	Asparagine	26	14	-242.418	-605.128	1.57467	0.123671	0.446418	406.018	0.221613	0.999721	0.996611
PANSS_high_vs_low	Nicotinic acid	26	14	-43.3003	-21.3039	-0.593258	0.559631	-0.218477	-9.50426	0.811562	0.999721	0.996611
PANSS_high_vs_low	Pyruvic acid	26	14	-238.354	6.13983	-1.33779	0.191841	-0.437915	62.8414	0.754035	0.999721	0.996611
PANSS_high_vs_low	L-Lactic acid	25	14	379.282	-290.756	1.06812	0.292432	0.310963	741.69	0.393727	0.999721	0.996611
PANSS_high_vs_low	Malonic acid	24	13	98.1059	-477.01	2.08993	0.0466283	0.537848	621.133	0.164315	0.999721	0.996611
PANSS_high_vs_low	Glyceric acid	26	14	8.70703	-25.6469	0.92183	0.363375	0.284048	92.2797	0.0549196	0.999721	0.996611
PANSS_high_vs_low	Guanidoacetic acid	18	10	14.1217	-20.5584	1.00205	0.327047	0.371002	9.79989	0.810931	0.999721	0.996611
PANSS_high_vs_low	L-Threonine	26	14	-118.962	-272.467	0.808185	0.424179	0.234931	465.948	0.0648317	0.999721	0.996611
PANSS_high_vs_low	Taurine	26	14	903.338	-473.868	1.71028	0.0957717	0.502347	1322.95	0.245056	0.999721	0.996611
PANSS_high_vs_low	Pyroglutamic acid	24	14	30.6578	-29.5365	1.59484	0.120005	0.493999	108.268	0.0286558	0.999721	0.996611
PANSS_high_vs_low	Itaconic acid	26	14	27.5137	-45.8952	0.776434	0.444418	0.258858	76.5635	0.515858	0.999721	0.996611
PANSS_high_vs_low	Citraconic acid	26	14	-0.804413	34.1754	-0.294091	0.771123	-0.0999249	-21.5345	0.880983	0.999721	0.996611
PANSS_high_vs_low	Ketoleucine	26	14	-14.5134	39.9466	-0.459476	0.650307	-0.162108	-63.1969	0.644755	0.999721	0.996611
PANSS_high_vs_low	Oxaloacetic acid	26	14	-64.2596	136.152	-0.934657	0.360544	-0.337703	-193.745	0.414712	0.999721	0.996611
PANSS_high_vs_low	Hypoxanthine	26	14	419.911	-151.306	2.10056	0.045268	0.514089	1007.13	0.0142559	0.999721	0.996611
PANSS_high_vs_low	a-ketoglutarate	26	14	66.2054	11.2145	0.272275	0.78744	0.089299	273.82	0.270307	0.999721	0.996611
PANSS_high_vs_low	Phenylpropiolic acid	26	14	52.3983	-51.4315	0.352782	0.726804	0.113649	398.381	0.277861	0.999721	0.996611
PANSS_high_vs_low	a-ketoglutarate.1	26	14	29.4596	-74.3987	0.828985	0.413415	0.260102	229.553	0.156564	0.999721	0.996611
PANSS_high_vs_low	Mevalonic acid	19	8	-27.3552	-5.1504	-0.655858	0.521368	-0.256301	-2.02145	0.952364	0.999721	0.996611
PANSS_high_vs_low	2-Hydroxyglutarate	26	14	42.7501	8.0759	0.374904	0.710043	0.113245	101.931	0.409486	0.999721	0.996611
PANSS_high_vs_low	3-methylphenylacetic acid	26	14	-63.3444	31.7543	-0.313915	0.756327	-0.108538	-141.72	0.68751	0.999721	0.996611
PANSS_high_vs_low	Xanthine	26	14	206.694	-61.4024	2.44626	0.0197247	0.635177	332.67	0.0612801	0.999721	0.996611
PANSS_high_vs_low	Orotic acid	25	14	-29.9104	-42.0243	0.0632273	0.950007	0.0203942	-6.74302	0.978309	0.999721	0.996611
PANSS_high_vs_low	Allantoin	10	5	-30.9908	31.1891	-1.21688	0.249757	-0.599465	-31.6032	0.723735	0.999721	0.996611
PANSS_high_vs_low	Indole-3-carboxylic acid	26	14	-2.62921	-2.5797	-0.000353109	0.999721	-0.000125669	-67.3215	0.671662	0.999721	0.996611
PANSS_high_vs_low	Quinolinic Acid	20	12	-8.7681	44.0004	-0.903867	0.381139	-0.387705	-15.5537	0.812235	0.999721	0.996611
PANSS_high_vs_low	Homogentisic acid	26	14	8.83208	-183.528	0.51209	0.61344	0.17871	284.193	0.49208	0.999721	0.996611
PANSS_high_vs_low	Uric acid	26	14	-53.4534	-1321.49	0.423729	0.675589	0.146665	1744.2	0.597056	0.999721	0.996611
PANSS_high_vs_low	Suberic Acid	26	14	-291.094	863.615	-1.09169	0.294543	-0.494758	-678.042	0.481705	0.999721	0.996611
PANSS_high_vs_low	Ascorbic acid	26	14	-71.0447	106.214	-0.545249	0.591474	-0.199287	-176.546	0.627779	0.999721	0.996611
PANSS_high_vs_low	N-carbamoyl-L-aspartate	26	14	-3.54669	-67.9311	0.601336	0.551926	0.188048	48.9123	0.714112	0.999721	0.996611
PANSS_high_vs_low	Indoleacrylic acid	26	14	-13.4165	-90.3484	1.41346	0.168316	0.457604	57.6658	0.416835	0.999721	0.996611
PANSS_high_vs_low	Azelaic acid	25	12	-98.8277	2477.63	-1.04994	0.313388	-0.484767	-1747.27	0.449026	0.999721	0.996611
PANSS_high_vs_low	2-Keto-L-gluconate	18	11	109.883	-59.3489	1.15374	0.264372	0.343409	23.8938	0.926275	0.999721	0.996611
PANSS_high_vs_low	p-Aminohippuric acid	26	13	-41.1063	30.03	-0.447356	0.658583	-0.151538	146.995	0.425092	0.999721	0.996611
PANSS_high_vs_low	Cinnamoylglycine	21	9	-4.63169	-2.06448	-0.0191078	0.98494	-0.00673087	87.1179	0.639452	0.999721	0.996611
PANSS_high_vs_low	Xanthurenic acid	23	13	-37.9856	-37.1954	-0.00732967	0.994204	-0.00245019	178.319	0.118466	0.999721	0.996611
PANSS_high_vs_low	Pantothenic acid	26	14	-69.0103	-43.5324	-0.221627	0.826327	-0.0740571	160.057	0.241498	0.999721	0.996611
PANSS_high_vs_low	Uridine	26	14	28.2994	-18.7184	0.746349	0.461772	0.244734	84.3891	0.302491	0.999721	0.996611
PANSS_high_vs_low	Pseudouridine	26	14	20.685	-3.34583	0.380514	0.706742	0.128657	5.9123	0.939081	0.999721	0.996611
PANSS_high_vs_low	glucose-1-phosphate	26	14	105.324	-135.382	1.77268	0.0852498	0.537418	221.764	0.239731	0.999721	0.996611
PANSS_high_vs_low	Inosine	24	13	167.617	-98.8531	2.18681	0.0386224	0.556124	222.642	0.255682	0.999721	0.996611
PANSS_high_vs_low	Xanthosine	26	14	111.393	-34.4676	0.962918	0.342223	0.288556	49.4961	0.794964	0.999721	0.996611
PANSS_high_vs_low	Eicosapentaenoic acid	25	14	-24.2987	-11.2466	-0.0882519	0.930724	-0.035123	16.7962	0.914624	0.999721	0.996611
PANSS_high_vs_low	11,12-DiHETrE	26	14	6.46787	-95.9979	0.368157	0.715414	0.11835	52.555	0.868989	0.999721	0.996611
PANSS_high_vs_low	Hexose Disaccharide Pool	21	12	-198.737	-281.517	0.936096	0.359985	0.255979	40.4689	0.793418	0.999721	0.996611
PANSS_high_vs_low	Orotidine monophosphate	16	7	4.09827	-12.528	0.382617	0.707693	0.159309	1.24479	0.984955	0.999721	0.996611
PANSS_high_vs_low	Plasmalogen(p16:0/20:4)	25	12	-278.311	-186.315	-0.768341	0.454052	-0.317437	24.9288	0.806206	0.999721	0.996611
PANSS_high_vs_low	PI(36:4)	23	8	-54.9818	148.288	-1.14008	0.27341	-0.436586	-97.3924	0.659819	0.999721	0.996611
PANSS_high_vs_low	PI(36:2)	18	8	-94.4523	29.6399	-1.65426	0.128942	-0.813913	-76.9044	0.283222	0.999721	0.996611
PANSS_high_vs_low	PI(36:1)	11	8	-52.374	-35.3505	-0.329346	0.746546	-0.154555	-4.69666	0.94928	0.999721	0.996611
PANSS_high_vs_low	PI(38:5)	17	6	-57.0786	78.397	-1.61852	0.141022	-0.772182	-136.92	0.168741	0.999721	0.996611
PANSS_high_vs_low	PI(38:4)	26	13	-225.52	-257.791	0.137241	0.891795	0.0436048	186.846	0.525449	0.999721	0.996611
PANSS_high_vs_low	PI(38:3)	24	10	-105.071	-85.4833	-0.190199	0.850824	-0.0629931	9.72162	0.941216	0.999721	0.996611
PANSS_high_vs_low	PI(40:5)	17	5	-17.1579	12.4219	-0.53827	0.602567	-0.222218	-49.5937	0.573482	0.999721	0.996611
PANSS_high_vs_low	Gluconolactone	26	13	8.05995	-50.442	1.15372	0.261886	0.417616	61.2276	0.291649	0.999721	0.996611
PANSS_high_vs_low	L-Tyrosine	26	14	-542.041	-524.586	-0.0246476	0.98053	-0.00833962	-7.88508	0.992225	0.999721	0.998062
PANSS_high_vs_low	Glutamic acid	26	14	141.608	-6.81465	0.38251	0.70468	0.120036	1.10387	0.998187	0.999721	0.998187
Response_yes_vs_no	Urea	33	8	-110.76	-333.174	1.0915	0.28776	0.30167	213.968	0.465495	0.762722	0.922903
Response_yes_vs_no	Sarcosine	33	8	-137.641	-1944.99	1.09633	0.289923	0.343114	1838.72	0.398208	0.762722	0.922903
Response_yes_vs_no	Alanine	33	8	-130.5	-1887.16	1.06494	0.303513	0.333916	1786.73	0.410214	0.767137	0.922903
Response_yes_vs_no	beta-Alanine	33	8	122.865	-228.172	0.978274	0.348006	0.362235	287.073	0.476707	0.767137	0.922903
Response_yes_vs_no	Dimethylglycine	33	8	-235.693	-881.467	1.91478	0.0629326	0.411816	391.117	0.521934	0.727098	0.922903
Response_yes_vs_no	L-Serine	33	8	330.023	-1039.31	1.99727	0.0558417	0.49863	1196.88	0.288814	0.727098	0.922903
Response_yes_vs_no	Hypotaurine	33	8	-139.498	126.212	-1.72718	0.104189	-0.539086	-246.744	0.198942	0.727098	0.922903
Response_yes_vs_no	Guanidinoacetic acid	33	8	-1056.91	-5298.78	1.64269	0.117913	0.478557	3413.97	0.333007	0.727098	0.922903
Response_yes_vs_no	L-Valine	33	8	-178.21	-1219.74	1.64068	0.117828	0.472153	858.757	0.328983	0.727098	0.922903
Response_yes_vs_no	Threonine	33	8	-218.646	-2276.48	1.97143	0.0596784	0.504692	1765.05	0.294779	0.727098	0.922903
Response_yes_vs_no	Purine	33	8	-95.4348	-53.1766	-0.424096	0.678919	-0.151555	-71.7148	0.545106	0.918857	0.922903
Response_yes_vs_no	Pipecolic acid	33	8	924.676	-2527.37	0.978202	0.344951	0.324419	3187.26	0.47475	0.767137	0.922903
Response_yes_vs_no	Hydroxyproline	33	8	-127.478	-534.384	1.27968	0.218629	0.388833	419.269	0.336905	0.727098	0.922903
Response_yes_vs_no	L-leucine + L-Isoleucine	33	8	-473.008	-5843.33	1.7088	0.100472	0.446726	4536.32	0.342534	0.727098	0.922903
Response_yes_vs_no	Methylcysteine	33	8	241.949	-386.98	0.881132	0.393625	0.294078	547.701	0.539727	0.774939	0.922903
Response_yes_vs_no	1-Methylnicotinamide	33	8	229.023	40.6965	0.720859	0.477204	0.180814	332.619	0.438877	0.802625	0.922903
Response_yes_vs_no	O-Phosphoethanolamine	30	7	31.4763	-21.2569	0.874842	0.403331	0.352808	70.138	0.293285	0.774939	0.922903
Response_yes_vs_no	Acetylcholine	33	8	282.912	-459.887	2.50566	0.0166033	0.546409	492.358	0.355255	0.727098	0.922903
Response_yes_vs_no	L-Glutamine	33	8	1259.49	-3658	1.12893	0.277084	0.360921	4615.06	0.418802	0.762722	0.922903
Response_yes_vs_no	L-Lysine	33	8	1426.31	-4258.08	1.25005	0.22961	0.386176	5514.72	0.373688	0.727098	0.922903
Response_yes_vs_no	L-Glutamic acid	33	8	224.989	-756.409	1.75406	0.0954668	0.497688	889.819	0.286563	0.727098	0.922903
Response_yes_vs_no	L-Methionine	33	8	-137.61	-1102.93	1.38271	0.181628	0.381592	790.474	0.435405	0.727098	0.922903
Response_yes_vs_no	7-methylguanine	33	8	49.6339	-93.4694	0.926452	0.37052	0.310135	121.958	0.523661	0.773735	0.922903
Response_yes_vs_no	Methionine sulfoxide	33	8	-87.0145	-225.627	1.26023	0.224717	0.376247	144.168	0.341983	0.727098	0.922903
Response_yes_vs_no	1-Methylhistidine	33	8	31.21	-171.202	0.752891	0.466445	0.276627	204.115	0.501954	0.802625	0.922903
Response_yes_vs_no	Citrulline	33	8	127.141	-1530.45	1.21994	0.239533	0.36704	1357.69	0.460578	0.728875	0.922903
Response_yes_vs_no	Serotonin	33	8	23.1618	-280.113	1.24516	0.228542	0.357012	260.396	0.45205	0.727098	0.922903
Response_yes_vs_no	L-Tyrosine	33	8	-314.414	-1059.23	1.01024	0.331562	0.35425	701.107	0.409074	0.767137	0.922903
Response_yes_vs_no	Acetyllysine	33	8	-55.8797	-402.892	1.49313	0.15487	0.457067	267.635	0.367445	0.727098	0.922903
Response_yes_vs_no	N-acetyl-glutamine	33	8	144.893	-453.627	2.1404	0.0448532	0.596735	496.168	0.21409	0.727098	0.922903
Response_yes_vs_no	N-acetyl-glutamate	33	8	387.488	-1272.26	0.979337	0.344478	0.325554	1553.89	0.463792	0.767137	0.922903
Response_yes_vs_no	Dimethyl-L-arginine	33	8	101.543	-174.557	2.56198	0.0193824	0.737691	288.387	0.0735179	0.727098	0.922903
Response_yes_vs_no	Butyrylcarnitine	33	8	-175.252	-510.584	0.738628	0.469236	0.21065	899.916	0.144397	0.802625	0.922903
Response_yes_vs_no	Cystine	33	8	120.877	-417.111	1.01207	0.327738	0.321515	556.283	0.425756	0.767137	0.922903
Response_yes_vs_no	Tiglylcarnitine	33	8	124.425	-285.74	0.842369	0.41523	0.292937	354.753	0.536377	0.780268	0.922903
Response_yes_vs_no	Isovalerylcarnitine	33	8	-218.884	167.807	-0.635804	0.540352	-0.290242	-343.056	0.526619	0.858737	0.922903
Response_yes_vs_no	Hexanoylcarnitine	33	8	190.901	-245.527	1.59093	0.120641	0.363937	553.888	0.285384	0.727098	0.922903
Response_yes_vs_no	3-Hydroxyisovaleryl carnitine	33	8	5.6517	-203.054	1.6207	0.117023	0.409994	145.048	0.461735	0.727098	0.922903
Response_yes_vs_no	3-Hydroxyhexanoylcarnitine	33	8	54.9615	-22.8167	0.590496	0.564078	0.191196	116.041	0.499965	0.867104	0.922903
Response_yes_vs_no	Saccharopine	29	6	-36.5102	16.1226	-0.732014	0.489261	-0.363619	-70.5252	0.31625	0.804457	0.922903
Response_yes_vs_no	1-Methyladenosine	33	8	41.2161	-84.0813	0.910136	0.382284	0.349993	108.954	0.451993	0.774939	0.922903
Response_yes_vs_no	2-Octenoylcarnitine	33	8	-294.414	4.30822	-1.19183	0.264149	-0.569892	-322.115	0.164622	0.740484	0.922903
Response_yes_vs_no	Adipoylcarnitine	32	8	54.0114	-158.273	1.3798	0.175793	0.290799	301.346	0.338618	0.727098	0.922903
Response_yes_vs_no	7-Methylguanosine	33	8	74.569	-39.0323	1.26731	0.224909	0.406023	110.751	0.345997	0.727098	0.922903
Response_yes_vs_no	5-Methylthioadenosine	33	8	-173.213	-265.053	1.71596	0.105206	0.52183	90.159	0.198082	0.727098	0.922903
Response_yes_vs_no	Suberylcarnitine	32	7	144.204	-108.533	1.03944	0.306361	0.202556	381.509	0.495058	0.767137	0.922903
Response_yes_vs_no	Cytidine monophosphate	29	7	33.076	-28.959	1.5809	0.141226	0.568551	70.5668	0.114163	0.727098	0.922903
Response_yes_vs_no	Anandamide	33	8	68.5863	-96.0678	2.2346	0.0315833	0.498027	149.828	0.282251	0.727098	0.922903
Response_yes_vs_no	S-adenosyl-L-homoCysteine	33	8	62.7948	-3.92267	0.794875	0.443669	0.307935	57.7534	0.484734	0.798603	0.922903
Response_yes_vs_no	3-Hydroxy-cis-5-tetradecenoylcarnitine	29	7	44.1991	-28.991	0.940773	0.354408	0.195458	156.96	0.360669	0.767137	0.922903
Response_yes_vs_no	Ceramide(d18:1/12:0)	31	8	-21.018	58.9332	-1.19791	0.262315	-0.593796	-86.2261	0.133814	0.740484	0.922903
Response_yes_vs_no	Dephospho-CoA	33	8	1.50425	27.9926	-0.432344	0.675789	-0.20692	-39.085	0.463077	0.918857	0.922903
Response_yes_vs_no	PC(16:0/18:2)	33	8	-675.776	-311.804	-0.813188	0.437871	-0.403089	-565.945	0.100545	0.796553	0.922903
Response_yes_vs_no	BMP(18:1/16:0)	13	4	-42.2956	62.6757	-1.09752	0.335819	-0.780289	-131.443	0.18382	0.767137	0.922903
Response_yes_vs_no	Phosphorylcholine	25	7	-601.275	-423.38	-0.40422	0.695683	-0.185551	-495.514	0.175704	0.918857	0.922903
Response_yes_vs_no	Nicotinamide Riboside	19	4	47.6662	-107.738	2.43264	0.0293303	0.768215	138.626	0.28975	0.727098	0.922903
Response_yes_vs_no	9-Decenoylcarnitine	33	8	-25.8183	-689.9	1.59079	0.122082	0.384107	648.215	0.375813	0.727098	0.922903
Response_yes_vs_no	Decanoylcarnitine	33	8	82.2899	-164.033	0.717717	0.478942	0.17838	361.962	0.51106	0.802625	0.922903
Response_yes_vs_no	Dodecenoylcarnitine	30	8	24.4285	-38.9709	0.431599	0.673006	0.152606	124.012	0.470542	0.918857	0.922903
Response_yes_vs_no	Dodecanoylcarnitine	28	7	130.414	-121.172	1.28605	0.207703	0.308528	425.064	0.260584	0.727098	0.922903
Response_yes_vs_no	Cholesterol	25	7	-197.339	-56.7758	-0.741682	0.480271	-0.389543	-180.755	0.267971	0.802625	0.922903
Response_yes_vs_no	2-Arachidonylglycerol	19	7	78.6976	-133.112	1.35737	0.1887	0.377278	281.299	0.330534	0.727098	0.922903
Response_yes_vs_no	Zymosterol	33	8	76.1879	340.244	-0.617226	0.546397	-0.195505	-318.35	0.540888	0.858737	0.922903
Response_yes_vs_no	L-Palmitoylcarnitine	16	7	235.225	-98.3699	1.02685	0.320642	0.304241	782.943	0.203894	0.767137	0.922903
Response_yes_vs_no	Linoleylcarnitine	18	3	334.244	-174.976	0.955137	0.352862	0.238145	1437.88	0.350625	0.767137	0.922903
Response_yes_vs_no	Oleoylcarnitine	20	6	261.512	-122.797	0.976494	0.34104	0.245638	1141.15	0.208194	0.767137	0.922903
Response_yes_vs_no	Leucine+isoleucine	33	8	-569.792	-6105.11	1.63156	0.117851	0.448201	4770.32	0.329391	0.727098	0.922903
Response_yes_vs_no	Tyrosine	33	8	-467.109	-1262.78	0.926639	0.371031	0.317124	752.349	0.458321	0.773735	0.922903
Response_yes_vs_no	Arginine	33	8	46.8077	-152.254	1.33684	0.191732	0.327858	214.435	0.386919	0.727098	0.922903
Response_yes_vs_no	Methionine	33	8	-114.587	-882.233	1.51915	0.142382	0.402495	655.819	0.389617	0.727098	0.922903
Response_yes_vs_no	Lysine	33	8	1394.99	-4186.19	1.21476	0.242958	0.380733	5199.09	0.396788	0.728875	0.922903
Response_yes_vs_no	Aspartic acid	33	8	145.987	-425.714	1.97973	0.0585895	0.505342	615.747	0.186676	0.727098	0.922903
Response_yes_vs_no	Glutamic acid	33	8	219.153	-244.63	1.1847	0.254726	0.375774	433.29	0.391041	0.738273	0.922903
Response_yes_vs_no	Glycine	33	8	108.487	-258.608	1.37496	0.184783	0.387244	413.712	0.299155	0.727098	0.922903
Response_yes_vs_no	L-Lactic acid	33	7	158.951	721.626	-0.592404	0.568659	-0.247785	-871.9	0.382818	0.867104	0.922903
Response_yes_vs_no	Taurine	33	8	554.404	-280.308	0.813886	0.432163	0.30104	1278.92	0.271571	0.794623	0.922903
Response_yes_vs_no	Oxaloacetic acid	33	8	64.012	-159.157	1.30691	0.207261	0.375486	186.618	0.446956	0.727098	0.922903
Response_yes_vs_no	Hypoxanthine	33	8	267.854	-38.5333	1.28416	0.206663	0.271923	479.761	0.275997	0.727098	0.922903
Response_yes_vs_no	Mevalonic acid	25	3	-18.1887	30.1435	-0.56082	0.627257	-0.514152	-67.2055	0.284479	0.918857	0.922903
Response_yes_vs_no	3-methylphenylacetic acid	33	8	76.2083	-357.212	1.76889	0.0930809	0.504216	425.952	0.239352	0.727098	0.922903
Response_yes_vs_no	Xanthine	33	8	138.715	-16.0622	1.34011	0.193608	0.357735	245.675	0.182321	0.727098	0.922903
Response_yes_vs_no	Allantoin	13	3	5.02034	-112.174	4.04161	0.00157849	1.2161	112.715	0.0514742	0.269922	0.922903
Response_yes_vs_no	Indole-3-carboxylic acid	33	8	36.9662	-91.9733	0.909598	0.38076	0.325168	107.418	0.523415	0.774939	0.922903
Response_yes_vs_no	Homogentisic acid	33	8	33.4751	-384.789	1.47036	0.155721	0.396437	308.335	0.465751	0.727098	0.922903
Response_yes_vs_no	Uric acid	33	8	277.291	-3311.91	1.69553	0.101479	0.425024	2545.74	0.449258	0.727098	0.922903
Response_yes_vs_no	Suberic Acid	33	8	226.106	-396.282	1.32145	0.194575	0.264011	972.919	0.323533	0.727098	0.922903
Response_yes_vs_no	Ascorbic acid	33	8	74.2008	-270.946	1.2923	0.214419	0.39356	338.419	0.362313	0.727098	0.922903
Response_yes_vs_no	Indoleacrylic acid	33	8	-60.3924	52.8065	-1.76069	0.106659	-0.68917	-114.627	0.108828	0.727098	0.922903
Response_yes_vs_no	p-Aminohippuric acid	32	8	-55.716	87.3027	-0.727743	0.483452	-0.30762	-167.205	0.380162	0.802625	0.922903
Response_yes_vs_no	Pantothenic acid	33	8	-84.4919	30.0049	-0.886107	0.394482	-0.339876	-134.065	0.339062	0.774939	0.922903
Response_yes_vs_no	Uridine	33	8	28.8422	-58.2744	1.4455	0.169553	0.464164	93.7068	0.260006	0.727098	0.922903
Response_yes_vs_no	Pseudouridine	33	8	27.0728	-47.0929	1.28569	0.218128	0.40689	56.015	0.475812	0.727098	0.922903
Response_yes_vs_no	glucose-1-phosphate	33	8	0.255464	176.492	-0.690006	0.509492	-0.383127	-138.762	0.479827	0.829745	0.922903
Response_yes_vs_no	Inosine	30	8	83.9989	15.771	0.3923	0.701153	0.139336	172.896	0.390957	0.918857	0.922903
Response_yes_vs_no	Xanthosine	33	8	96.9	-93.5001	1.60168	0.119311	0.382365	132.97	0.491988	0.727098	0.922903
Response_yes_vs_no	11,12-DiHETrE	33	8	52.1893	-285.687	1.47067	0.155687	0.397015	229.267	0.485017	0.727098	0.922903
Response_yes_vs_no	Hexose Disaccharide Pool	28	6	-215.732	847.217	-0.9232	0.398005	-0.918035	-906.111	0.122556	0.774939	0.922903
Response_yes_vs_no	Plasmalogen(p16:0/20:4)	30	8	-253.675	-206.634	-0.354444	0.730787	-0.162271	-126.814	0.210563	0.918857	0.922903
Response_yes_vs_no	PI(36:2)	20	7	-68.2129	-28.2971	-0.461832	0.656752	-0.250121	-63.1535	0.377416	0.918857	0.922903
Response_yes_vs_no	PI(36:1)	17	3	-60.2946	45.3798	-2.01468	0.129648	-1.05871	-146.367	0.0614271	0.727098	0.922903
Response_yes_vs_no	PI(38:4)	32	8	-252.83	-149.359	-0.401695	0.694629	-0.141802	-252.37	0.394871	0.918857	0.922903
Response_yes_vs_no	Ornithine	33	8	-3.56397	-112.061	0.867727	0.400426	0.286913	90.0028	0.555592	0.774939	0.927109
Response_yes_vs_no	N-acetyl spermine	33	8	237.315	-293.951	0.833314	0.420394	0.293032	431.522	0.558434	0.781384	0.927109
Response_yes_vs_no	Trimethylamine-N-oxide	33	8	3.94118	62.557	-0.435502	0.672911	-0.191846	-62.8833	0.577739	0.918857	0.931583
Response_yes_vs_no	3-Aminoisobutyric acid	33	8	-11.579	28.9622	-0.298232	0.770755	-0.109294	-73.7343	0.638967	0.94994	0.931583
Response_yes_vs_no	Histamine	28	4	9.93614	57.1363	-0.402269	0.707592	-0.200804	-63.2753	0.659604	0.918857	0.931583
Response_yes_vs_no	Betaine	31	8	-15.5977	-79.9978	0.51856	0.612447	0.178094	65.5589	0.668084	0.91867	0.931583
Response_yes_vs_no	L-Phenylalanine	33	8	-286.042	-1165.44	1.19696	0.24276	0.309882	644.705	0.59009	0.728875	0.931583
Response_yes_vs_no	L-Acetylcarnitine	33	8	74.2645	-1614.35	1.34772	0.18748	0.321989	1117.45	0.602499	0.727098	0.931583
Response_yes_vs_no	Propionylcarnitine	33	8	-79.7603	-461.484	0.612612	0.551153	0.215099	283.516	0.681712	0.858737	0.931583
Response_yes_vs_no	Malonylcarnitine	33	8	-4.63489	-145.063	1.39483	0.172932	0.333051	80.1181	0.651348	0.727098	0.931583
Response_yes_vs_no	Glycerophosphocholine	33	8	1107.61	-92.4771	0.357543	0.72781	0.143644	1318.11	0.692992	0.918857	0.931583
Response_yes_vs_no	L-Glutarylcarnitine	33	8	61.0338	-20.795	0.396307	0.69695	0.119507	132.86	0.646459	0.918857	0.931583
Response_yes_vs_no	Pimelylcarnitine	32	8	40.1493	-286.153	1.42039	0.163805	0.315751	175.562	0.685156	0.727098	0.931583
Response_yes_vs_no	Agmatine	27	7	32.3947	-97.0909	1.18945	0.249812	0.359946	91.759	0.597202	0.736516	0.931583
Response_yes_vs_no	Aspartylglycosamine	31	8	22.3538	-45.3135	0.847407	0.411803	0.294369	45.7293	0.631712	0.780268	0.931583
Response_yes_vs_no	Histidine	33	8	8.74489	-164.653	1.01855	0.326428	0.341621	115.325	0.574821	0.767137	0.931583
Response_yes_vs_no	Tryptophan	33	8	-299.275	-226.191	-0.226117	0.825706	-0.0954135	-146.201	0.626898	0.960515	0.931583
Response_yes_vs_no	Glyceric acid	33	8	-2.36124	-13.8026	0.268806	0.792507	0.0947712	20.7853	0.681699	0.958839	0.931583
Response_yes_vs_no	Guanidoacetic acid	24	5	12.2952	-45.1799	1.85206	0.0932258	0.63443	24.8638	0.588536	0.727098	0.931583
Response_yes_vs_no	Itaconic acid	33	8	-2.26033	16.4608	-0.146318	0.886801	-0.0663691	-46.7491	0.697325	0.968938	0.931583
Response_yes_vs_no	Citraconic acid	33	8	19.243	-43.1252	0.425788	0.679385	0.180157	57.4594	0.695669	0.918857	0.931583
Response_yes_vs_no	2-Hydroxyglutarate	33	8	50.5851	-53.4217	1.10517	0.286303	0.346988	63.6902	0.613724	0.762722	0.931583
Response_yes_vs_no	Orotic acid	32	8	9.1668	-90.613	0.497469	0.626584	0.165267	103.222	0.689712	0.918857	0.931583
Response_yes_vs_no	2-Keto-L-gluconate	24	6	71.3591	-78.0742	1.35629	0.18801	0.306382	110.266	0.641527	0.727098	0.931583
Response_yes_vs_no	Xanthurenic acid	30	7	-55.6883	62.5607	-0.954949	0.362596	-0.374829	-62.6425	0.611388	0.773735	0.931583
Response_yes_vs_no	Eicosapentaenoic acid	32	8	-43.6071	55.479	-0.624569	0.5466	-0.271124	-78.2914	0.626548	0.858737	0.931583
Response_yes_vs_no	PI(38:5)	18	6	-29.2118	-6.80621	-0.235448	0.820269	-0.123214	-41.518	0.658674	0.960515	0.931583
Response_yes_vs_no	DL-2-Aminooctanoic acid	33	8	25.7088	-15.0338	0.117866	0.908286	0.0450704	119.639	0.739767	0.971253	0.958812
Response_yes_vs_no	Octanoylcarnitine	33	8	-28.1052	-428.161	1.42227	0.167647	0.369304	145.8	0.73191	0.727098	0.958812
Response_yes_vs_no	Asparagine	33	8	-385.338	-214.193	-0.38556	0.709588	-0.207264	-113.929	0.740135	0.918857	0.958812
Response_yes_vs_no	a-ketoglutarate	33	8	67.2105	-22.0719	0.392013	0.702309	0.146934	85.546	0.737196	0.918857	0.958812
Response_yes_vs_no	Methylguanidine	32	8	-129.935	-223.415	0.355503	0.72874	0.135117	67.4093	0.824113	0.918857	0.966303
Response_yes_vs_no	Creatinine	33	8	86.2007	35.3485	0.071461	0.944303	0.0272708	-111.228	0.883069	0.984901	0.966303
Response_yes_vs_no	L-Proline	33	8	-968.751	-444.643	-0.135474	0.894466	-0.0485106	1049.61	0.812146	0.968938	0.966303
Response_yes_vs_no	Indole	33	8	-212.131	-203.2	-0.0354921	0.972372	-0.0145527	-61.9805	0.796113	0.99205	0.966303
Response_yes_vs_no	Creatine	33	8	-1675.14	-1392.05	-0.111123	0.913985	-0.0531338	298.783	0.890853	0.971253	0.966303
Response_yes_vs_no	Homocysteine	33	8	-21.1018	-15.4427	-0.0399293	0.968882	-0.0156507	25.1331	0.869417	0.99205	0.966303
Response_yes_vs_no	Adenine	33	8	-63.977	-90.2485	0.152624	0.88175	0.0642257	33.3037	0.844831	0.968938	0.966303
Response_yes_vs_no	L-Histidine	33	8	-115.936	-198.664	0.145836	0.886028	0.0464844	109.346	0.879495	0.968938	0.966303
Response_yes_vs_no	L-Carnitine	33	8	-387.971	-1789.34	0.75872	0.459965	0.241568	628.027	0.782102	0.802625	0.966303
Response_yes_vs_no	N-Acetylornithine	33	8	72.3497	85.2601	-0.0325693	0.974725	-0.0152416	-46.1641	0.892842	0.99205	0.966303
Response_yes_vs_no	Normetanephrine	33	8	-74.3001	-67.1974	-0.0221779	0.982695	-0.00837193	-72.111	0.834867	0.99205	0.966303
Response_yes_vs_no	Homoarginine	33	8	-171.07	-122.667	-0.189217	0.854039	-0.0868761	-71.258	0.753038	0.968938	0.966303
Response_yes_vs_no	5-Hydroxyindoleacetic acid	33	8	-66.8501	-47.8879	-0.16088	0.874118	-0.0482809	-29.4602	0.852655	0.968938	0.966303
Response_yes_vs_no	L-Tryptophan	33	8	-1170.88	-1188.48	0.0110308	0.991408	0.00444368	-361.584	0.814592	0.99205	0.966303
Response_yes_vs_no	Hydroxykynurenine	33	8	-38.7733	1.7582	-0.213074	0.835612	-0.0904066	-40.6744	0.833464	0.96547	0.966303
Response_yes_vs_no	Myristoylcarnitine	33	8	15.6015	80.4941	-0.305999	0.764811	-0.10961	37.0937	0.875622	0.94994	0.966303
Response_yes_vs_no	Vitamin K2	24	5	8.84724	77.7601	-0.78345	0.450129	-0.261373	22.0312	0.870124	0.801791	0.966303
Response_yes_vs_no	Pyruvic acid	33	8	-137.045	-149.709	0.0706722	0.944584	0.0222124	-61.3484	0.766162	0.984901	0.966303
Response_yes_vs_no	Malonic acid	31	7	-67.1296	-5.90845	-0.135415	0.89514	-0.0541357	-136.447	0.778443	0.968938	0.966303
Response_yes_vs_no	L-Threonine	33	8	-186.533	-183.954	-0.0101948	0.99205	-0.0039387	-40.367	0.880662	0.99205	0.966303
Response_yes_vs_no	Pyroglutamic acid	31	8	13.2393	-1.73263	0.36402	0.721121	0.120695	14.8089	0.779389	0.918857	0.966303
Response_yes_vs_no	Phenylpropiolic acid	33	8	50.4003	-88.4048	0.416655	0.684544	0.153772	88.7121	0.813977	0.918857	0.966303
Response_yes_vs_no	N-carbamoyl-L-aspartate	33	8	-20.9828	-35.889	0.134043	0.895276	0.0438888	-28.2459	0.836549	0.968938	0.966303
Response_yes_vs_no	Orotidine monophosphate	17	7	1.91867	-21.2627	0.605515	0.552404	0.223946	10.8148	0.83503	0.858737	0.966303
Response_yes_vs_no	PI(36:4)	25	7	-12.1906	37.4847	-0.263319	0.797423	-0.106559	-45.8879	0.830179	0.958839	0.966303
Response_yes_vs_no	PI(38:3)	27	8	-95.2366	-105.543	0.0943234	0.926177	0.0336269	-36.2836	0.770244	0.977632	0.966303
Response_yes_vs_no	N-acetyl-L-alanine	33	8	-1566.05	-1232.79	-0.137658	0.893564	-0.0654822	204.724	0.921798	0.968938	0.96793
Response_yes_vs_no	3-Hydroxydodecanoylcarnitine	31	7	1.05821	48.6493	-0.301081	0.772173	-0.176465	-13.4213	0.909167	0.94994	0.96793
Response_yes_vs_no	24,25-Dihydrolanosterol	33	8	-4.71153	80.096	-0.228083	0.822961	-0.0757282	-40.9327	0.931028	0.960515	0.96793
Response_yes_vs_no	Ketoleucine	33	8	13.0375	-24.0397	0.257964	0.801836	0.111539	12.1346	0.930856	0.958839	0.96793
Response_yes_vs_no	Azelaic acid	31	7	444.252	1854	-0.586639	0.572998	-0.263219	-202.168	0.933968	0.867104	0.96793
Response_yes_vs_no	PI(40:5)	17	6	1.65172	-46.986	1.04564	0.3108	0.378128	-5.93265	0.92984	0.767137	0.96793
Response_yes_vs_no	Gluconolactone	32	8	-6.96854	-3.89737	-0.0514018	0.959992	-0.0212191	-5.7625	0.92544	0.99205	0.96793
Response_yes_vs_no	Cinnamoylglycine	24	7	1.89658	-50.2672	0.36	0.725273	0.138864	13.0494	0.940587	0.918857	0.968918
Response_yes_vs_no	Riboflavin	33	8	-23.818	-12.3053	-0.109683	0.914455	-0.0392053	-7.1729	0.955757	0.971253	0.978649
Response_yes_vs_no	a-ketoglutarate.1	33	8	-1.54415	-23.8301	0.146151	0.886444	0.056097	-6.78833	0.967661	0.968938	0.984404
Response_yes_vs_no	Quinolinic Acid	26	7	10.6273	-4.71545	0.277651	0.786748	0.111273	-2.31917	0.972891	0.958839	0.984404
Response_yes_vs_no	L-Kynurenine	33	8	-109.584	-151.883	0.240999	0.812457	0.0719669	-5.08808	0.983009	0.960515	0.988791
Response_yes_vs_no	Nicotinic acid	33	8	-32.713	-45.0042	0.462246	0.648318	0.123068	-0.229391	0.995501	0.918857	0.995501
Smoking_yes_vs_no	Urea	15	26	-363.102	-33.6129	-1.63742	0.109621	-0.454622	-583.765	0.0534437	0.624842	0.456944
Smoking_yes_vs_no	Dimethylglycine	15	26	-751.987	-136.532	-1.48289	0.146772	-0.394373	-1233.05	0.0501798	0.683631	0.456944
Smoking_yes_vs_no	Indole	15	26	-444.72	-75.1972	-2.27086	0.0287793	-0.630667	-571.828	0.0217853	0.351518	0.456944
Smoking_yes_vs_no	Acetyllysine	15	26	-317.83	-11.5279	-1.41063	0.166337	-0.4045	-663.427	0.0316845	0.71637	0.456944
Smoking_yes_vs_no	5-Hydroxyindoleacetic acid	15	26	-158.685	-8.03372	-1.28647	0.206665	-0.390579	-330.423	0.0431064	0.736245	0.456944
Smoking_yes_vs_no	L-Acetylcarnitine	15	26	-1607.74	525.081	-1.39162	0.172297	-0.411498	-4572.88	0.0390906	0.71637	0.456944
Smoking_yes_vs_no	L-Tryptophan	15	26	-2569.24	-369.547	-2.12625	0.040066	-0.577297	-3565.87	0.0257103	0.45258	0.456944
Smoking_yes_vs_no	L-Kynurenine	15	26	-335.31	7.62697	-2.31945	0.0263696	-0.609032	-559.033	0.02408	0.351518	0.456944
Smoking_yes_vs_no	Glycerophosphocholine	15	26	-1016.96	1964.07	-1.17739	0.24717	-0.361848	-6678.91	0.0517714	0.741301	0.456944
Smoking_yes_vs_no	3-Hydroxyisovaleryl carnitine	15	26	-210.6	66.1951	-2.02403	0.0499487	-0.55623	-509.724	0.0136901	0.462952	0.456944
Smoking_yes_vs_no	5-Methylthioadenosine	15	26	-242.074	-161.743	-1.55906	0.127346	-0.457774	-147.506	0.0433684	0.659884	0.456944
Smoking_yes_vs_no	S-adenosyl-L-homoCysteine	15	26	-2.95606	80.1996	-1.32916	0.191714	-0.387755	-212.479	0.0141918	0.716482	0.456944
Smoking_yes_vs_no	Phosphorylcholine	9	23	-1153.88	-330.896	-2.89385	0.00808762	-0.932499	-887.758	0.0347448	0.304595	0.456944
Smoking_yes_vs_no	Tryptophan	15	26	-536.749	-139.783	-1.964	0.0568538	-0.535676	-678.967	0.0293987	0.462952	0.456944
Smoking_yes_vs_no	Malonic acid	15	23	-534.462	256.285	-2.77531	0.0106875	-0.746585	-1054.45	0.0331474	0.304595	0.456944
Smoking_yes_vs_no	Guanidoacetic acid	10	19	-18.3737	13.3116	-0.955527	0.349276	-0.344288	-100.341	0.0307038	0.785871	0.456944
Smoking_yes_vs_no	Xanthurenic acid	14	23	-0.68149	-53.1819	0.505741	0.616631	0.16511	257.1	0.0408713	0.872612	0.456944
Smoking_yes_vs_no	Xanthosine	15	26	-70.5029	134.894	-1.51151	0.138811	-0.416109	-521.327	0.0104628	0.683631	0.456944
Smoking_yes_vs_no	11,12-DiHETrE	15	26	-224.288	107.734	-1.3143	0.196928	-0.392319	-766.339	0.0249012	0.716482	0.456944
Smoking_yes_vs_no	PI(38:3)	13	22	-243.208	-11.5464	-2.83365	0.00816745	-0.81569	-267.719	0.0456101	0.304595	0.456944
Smoking_yes_vs_no	Guanidinoacetic acid	15	26	-3913.87	-713.852	-1.18758	0.24291	-0.359935	-6440.17	0.076136	0.741301	0.457964
Smoking_yes_vs_no	L-Valine	15	26	-907.295	-78.0549	-1.26498	0.213793	-0.375476	-1581.28	0.0806945	0.741301	0.457964
Smoking_yes_vs_no	L-Histidine	15	26	229.34	-340.589	1.03741	0.307162	0.324262	1315.09	0.0746586	0.762285	0.457964
Smoking_yes_vs_no	L-Carnitine	15	26	-1817.92	5.80713	-1.00514	0.322383	-0.316673	-4237.97	0.0684638	0.762285	0.457964
Smoking_yes_vs_no	N-Acetylornithine	15	26	-187.515	226.244	-1.7303	0.0916555	-0.503324	-627.656	0.0734198	0.567791	0.457964
Smoking_yes_vs_no	Homoarginine	15	26	-329.837	-64.5803	-1.68023	0.101097	-0.489503	-397.697	0.0857008	0.596123	0.457964
Smoking_yes_vs_no	Propionylcarnitine	15	26	-624.454	117.033	-1.47652	0.14792	-0.42532	-1351.73	0.0570043	0.683631	0.457964
Smoking_yes_vs_no	Isovalerylcarnitine	15	26	-597.979	118.806	-1.96709	0.0563162	-0.553934	-969.841	0.0807037	0.462952	0.457964
Smoking_yes_vs_no	Decanoylcarnitine	15	26	-439.985	307.811	-2.07403	0.0449933	-0.56042	-975.131	0.0839957	0.45258	0.457964
Smoking_yes_vs_no	Glutamic acid	15	26	-212.819	325.665	-1.58518	0.121022	-0.44143	-943.592	0.0695497	0.659884	0.457964
Smoking_yes_vs_no	Uric acid	15	26	-2061.7	522.34	-0.994495	0.326927	-0.304932	-6120.82	0.0764427	0.762285	0.457964
Smoking_yes_vs_no	PI(38:4)	14	26	-525.941	-73.9331	-2.41913	0.0206062	-0.648833	-544.431	0.0833142	0.351518	0.457964
Smoking_yes_vs_no	1-Methylhistidine	15	26	-189.44	96.2276	-1.38738	0.173227	-0.39529	-519.921	0.0946649	0.71637	0.476109
Smoking_yes_vs_no	Octanoylcarnitine	15	26	-215.818	-42.9034	-0.515747	0.609341	-0.158338	-732.328	0.0919523	0.872612	0.476109
Smoking_yes_vs_no	Myristoylcarnitine	15	26	117.869	-23.4319	0.706525	0.48629	0.240105	399.266	0.0984541	0.85565	0.481019
Smoking_yes_vs_no	Hypotaurine	15	26	-342.718	59.5009	-2.57191	0.0161719	-0.867167	-313.736	0.112918	0.351518	0.496219
Smoking_yes_vs_no	Hydroxyproline	15	26	-426.833	-79.9755	-1.05242	0.300513	-0.331756	-708.754	0.113173	0.762285	0.496219
Smoking_yes_vs_no	1-Methyladenosine	15	26	-57.8297	59.8048	-1.06495	0.2945	-0.329597	-236.934	0.109674	0.762285	0.496219
Smoking_yes_vs_no	9-Decenoylcarnitine	15	26	-530.379	60.9418	-1.15665	0.254809	-0.342738	-1189.21	0.112508	0.741301	0.496219
Smoking_yes_vs_no	L-leucine + L-Isoleucine	15	26	-3656.06	-289.039	-0.923494	0.361918	-0.278168	-7489.21	0.125713	0.803741	0.499929
Smoking_yes_vs_no	DL-2-Aminooctanoic acid	15	26	-315.534	210.043	-2.07767	0.0445544	-0.606853	-564.75	0.123349	0.45258	0.499929
Smoking_yes_vs_no	p-Aminohippuric acid	15	25	45.0696	-70.4214	0.763737	0.450982	0.248322	299.989	0.120671	0.85565	0.499929
Smoking_yes_vs_no	Plasmalogen(p16:0/20:4)	12	26	-388.55	-176.951	-2.94103	0.00571598	-0.776726	-175.135	0.119892	0.304595	0.499929
Smoking_yes_vs_no	Asparagine	15	26	-670.622	-168.091	-2.41768	0.0209781	-0.635616	-527.989	0.130653	0.351518	0.507763
Smoking_yes_vs_no	Homogentisic acid	15	26	-202.705	41.0362	-0.730823	0.470167	-0.229542	-646.484	0.133724	0.85565	0.50815
Smoking_yes_vs_no	N-acetyl spermine	15	26	-257.216	359.155	-1.08855	0.284458	-0.342381	-1108.44	0.139763	0.762285	0.519555
Smoking_yes_vs_no	L-Lactic acid	15	25	-306.184	595.582	-1.37608	0.176895	-0.403117	-1442.91	0.143573	0.71637	0.522361
Smoking_yes_vs_no	Saccharopine	12	23	-49.3213	-16.0959	-0.656455	0.517824	-0.228704	-96.6811	0.154837	0.85565	0.54908
Smoking_yes_vs_no	Leucine+isoleucine	15	26	-3671.9	-483.285	-0.837118	0.408269	-0.256031	-6963.81	0.163065	0.85565	0.54908
Smoking_yes_vs_no	Glyceric acid	15	26	15.0398	-15.9207	0.742801	0.464903	0.258341	72.6974	0.157656	0.85565	0.54908
Smoking_yes_vs_no	2-Keto-L-gluconate	13	17	-67.2512	124.614	-1.24081	0.232477	-0.398314	-343.2	0.163761	0.741301	0.54908
Smoking_yes_vs_no	Ceramide(d18:1/12:0)	13	26	24.7328	-19.293	0.874355	0.39242	0.321316	83.2739	0.175972	0.85565	0.568427
Smoking_yes_vs_no	PI(40:5)	6	17	-81.4513	13.8159	-2.40648	0.0255228	-0.774556	-108.911	0.176179	0.351518	0.568427
Smoking_yes_vs_no	beta-Alanine	15	26	-116.518	152.959	-0.794208	0.43508	-0.277684	-535.898	0.190899	0.85565	0.583177
Smoking_yes_vs_no	N-acetyl-L-alanine	15	26	-3681.31	-243.169	-2.72913	0.00989879	-0.716324	-2679.05	0.203927	0.304595	0.583177
Smoking_yes_vs_no	Creatine	15	26	-3959.55	-270.1	-2.79687	0.0083145	-0.736728	-2841.48	0.19704	0.304595	0.583177
Smoking_yes_vs_no	Ornithine	15	26	-25.6139	-24.2265	-0.0113843	0.990991	-0.0036442	-194.995	0.207706	0.990991	0.583177
Smoking_yes_vs_no	1-Methylnicotinamide	15	26	-109.731	366.511	-1.87004	0.0718889	-0.468039	-576.628	0.18682	0.49172	0.583177
Smoking_yes_vs_no	Cystine	15	26	-357.732	231.463	-1.17785	0.246593	-0.35446	-893.127	0.208034	0.741301	0.583177
Smoking_yes_vs_no	Tiglylcarnitine	15	26	-178.6	173.043	-0.754072	0.457337	-0.251294	-746.615	0.199492	0.85565	0.583177
Smoking_yes_vs_no	3-Hydroxyhexanoylcarnitine	15	26	96.0976	7.29742	0.767432	0.447463	0.218902	219.722	0.207966	0.85565	0.583177
Smoking_yes_vs_no	N-acetyl-glutamine	15	26	91.1246	-8.24672	0.273671	0.786799	0.096394	-509.521	0.21207	0.908491	0.584903
Smoking_yes_vs_no	Methylcysteine	15	26	-143.382	270.739	-0.599083	0.553637	-0.193141	-1091.81	0.227441	0.86855	0.61734
Smoking_yes_vs_no	Threonine	15	26	-1217.48	-275.574	-0.720045	0.47679	-0.227724	-2044.31	0.23326	0.85565	0.623242
Smoking_yes_vs_no	Malonylcarnitine	15	26	-21.8071	-37.9364	0.115198	0.909109	0.0379146	-208.071	0.245579	0.959615	0.646061
Smoking_yes_vs_no	N-acetyl-glutamate	15	26	-1101.82	736.013	-1.21564	0.231918	-0.363071	-2434.24	0.257115	0.741301	0.654138
Smoking_yes_vs_no	PC(16:0/18:2)	15	26	-909.396	-429.004	-1.8216	0.0766993	-0.543617	-404.733	0.253845	0.504446	0.654138
Smoking_yes_vs_no	Eicosapentaenoic acid	15	25	40.4794	-62.3514	0.746824	0.464428	0.282382	181.663	0.260125	0.85565	0.654138
Smoking_yes_vs_no	L-Serine	15	26	-121.741	169.323	-0.322105	0.749629	-0.104015	-1113.6	0.33074	0.908491	0.661663
Smoking_yes_vs_no	Homocysteine	15	26	1.71636	-32.5249	0.277532	0.783652	0.0947985	162.192	0.292383	0.908491	0.661663
Smoking_yes_vs_no	L-Methionine	15	26	-576.507	-181.421	-0.482703	0.632771	-0.154784	-1008	0.3252	0.872612	0.661663
Smoking_yes_vs_no	7-methylguanine	15	26	-40.2045	57.432	-0.666605	0.50988	-0.211076	-186.307	0.334377	0.85565	0.661663
Smoking_yes_vs_no	L-Tyrosine	15	26	-717.707	-310.919	-0.606817	0.548337	-0.192366	-930.737	0.279324	0.86855	0.661663
Smoking_yes_vs_no	Dephospho-CoA	15	26	19.6326	-0.804169	0.487727	0.629468	0.159579	52.8321	0.326262	0.872612	0.661663
Smoking_yes_vs_no	Nicotinamide Riboside	10	13	-29.8249	59.4579	-1.04393	0.308717	-0.432692	-120.282	0.316607	0.762285	0.661663
Smoking_yes_vs_no	Aspartylglycosamine	15	24	-9.46141	19.6825	-0.390986	0.698413	-0.126099	-106.627	0.286366	0.901478	0.661663
Smoking_yes_vs_no	Cholesterol	11	21	-310.555	-91.1807	-1.91389	0.0658557	-0.627483	-164.762	0.332233	0.49172	0.661663
Smoking_yes_vs_no	Histidine	15	26	-77.3173	5.04298	-0.489303	0.628448	-0.16123	-216.085	0.297833	0.872612	0.661663
Smoking_yes_vs_no	Tyrosine	15	26	-881.958	-472.594	-0.503209	0.618517	-0.162338	-968.814	0.344374	0.872612	0.661663
Smoking_yes_vs_no	Itaconic acid	15	26	-13.1945	9.80822	-0.25288	0.802097	-0.0815844	-115.39	0.340464	0.908491	0.661663
Smoking_yes_vs_no	Citraconic acid	15	26	-47.7871	38.724	-0.786136	0.437817	-0.25114	-144.63	0.328396	0.85565	0.661663
Smoking_yes_vs_no	Oxaloacetic acid	15	26	-71.4727	73.509	-0.72967	0.471857	-0.242873	-246.258	0.320827	0.85565	0.661663
Smoking_yes_vs_no	a-ketoglutarate	15	26	106.93	16.8237	0.461642	0.647657	0.148424	261.766	0.308233	0.885995	0.661663
Smoking_yes_vs_no	Mevalonic acid	10	18	-29.9519	-3.59816	-0.799215	0.431634	-0.279261	-41.6647	0.338048	0.85565	0.661663
Smoking_yes_vs_no	Indole-3-carboxylic acid	15	26	-13.1659	26.2149	-0.30184	0.76495	-0.0985738	-170.565	0.315649	0.908491	0.661663
Smoking_yes_vs_no	Pantothenic acid	15	26	-53.4005	-67.1995	0.127952	0.899005	0.0405843	135.037	0.341715	0.959615	0.661663
Smoking_yes_vs_no	Pseudouridine	15	26	2.29832	18.5456	-0.298411	0.767041	-0.0880255	-83.791	0.29154	0.908491	0.661663
Smoking_yes_vs_no	glucose-1-phosphate	15	26	-77.5642	99.378	-1.35163	0.184329	-0.386962	-197.256	0.320121	0.71637	0.661663
Smoking_yes_vs_no	Gluconolactone	15	25	-22.2682	3.19401	-0.556711	0.581556	-0.17659	-59.3525	0.333899	0.872612	0.661663
Smoking_yes_vs_no	L-Proline	15	26	-3267	518.424	-1.21997	0.229983	-0.355668	-4081.69	0.358211	0.741301	0.671156
Smoking_yes_vs_no	Betaine	14	25	-47.1903	-18.5139	-0.245202	0.80798	-0.0791474	-147.734	0.355187	0.908978	0.671156
Smoking_yes_vs_no	Aspartic acid	15	26	-94.272	108.69	-0.576611	0.567936	-0.176402	-433.768	0.36109	0.872612	0.671156
Smoking_yes_vs_no	Purine	15	26	-128.328	-63.4556	-0.695234	0.493017	-0.23376	-107.163	0.369671	0.85565	0.672487
Smoking_yes_vs_no	Orotidine monophosphate	8	16	-19.6163	2.54431	-0.567113	0.576945	-0.214065	-50.9052	0.366	0.872612	0.672487
Smoking_yes_vs_no	Adenine	15	26	-123.909	-37.4843	-0.663093	0.51226	-0.212369	-149.899	0.380836	0.85565	0.684413
Smoking_yes_vs_no	Citrulline	15	26	-6.41396	-305.837	0.199078	0.843644	0.0656102	-1601.59	0.388234	0.936774	0.684413
Smoking_yes_vs_no	Dodecenoylcarnitine	13	25	-166.678	103.516	-2.48609	0.0177552	-0.684188	-156.732	0.385509	0.351518	0.684413
Smoking_yes_vs_no	Butyrylcarnitine	15	26	-356.514	-173.857	-0.356021	0.724311	-0.114507	517.694	0.410529	0.908491	0.68824
Smoking_yes_vs_no	Hexanoylcarnitine	15	26	-126.019	239.454	-1.03611	0.30678	-0.304887	-439.356	0.402862	0.762285	0.68824
Smoking_yes_vs_no	Taurine	15	26	811.129	149.459	0.730464	0.471023	0.238505	975.074	0.408146	0.85565	0.68824
Smoking_yes_vs_no	Ketoleucine	15	26	-16.0287	18.3981	-0.329042	0.744267	-0.103595	-118.846	0.3976	0.908491	0.68824
Smoking_yes_vs_no	Indoleacrylic acid	15	26	-62.1497	-24.5482	-0.762888	0.450216	-0.221761	-61.5889	0.400084	0.85565	0.68824
Smoking_yes_vs_no	24,25-Dihydrolanosterol	15	26	136.163	-59.8908	0.54155	0.592221	0.175639	379.526	0.424132	0.872612	0.704141
Smoking_yes_vs_no	Hypoxanthine	15	26	69.117	288.236	-0.712316	0.48061	-0.194182	349.689	0.433019	0.85565	0.711983
Smoking_yes_vs_no	Methionine	15	26	-399.319	-186.517	-0.341714	0.734967	-0.110278	-597.383	0.437481	0.908491	0.71247
Smoking_yes_vs_no	Pipecolic acid	15	26	-565.146	722.021	-0.359885	0.72175	-0.12014	-3444.11	0.44328	0.908491	0.715103
Smoking_yes_vs_no	Methylguanidine	15	25	19.4648	-249.489	1.21318	0.234599	0.395578	218.253	0.469436	0.741301	0.733284
Smoking_yes_vs_no	Alanine	15	26	-968.526	-187.535	-0.437546	0.665322	-0.147497	-1331.63	0.542244	0.888829	0.733284
Smoking_yes_vs_no	Acetylcholine	15	26	375.952	0.681423	0.786249	0.439385	0.271909	-326.869	0.542797	0.85565	0.733284
Smoking_yes_vs_no	L-Glutamine	15	26	-858.258	968.191	-0.40642	0.687462	-0.13292	-4155.83	0.470142	0.901478	0.733284
Smoking_yes_vs_no	Methionine sulfoxide	15	26	-163.005	-85.8238	-0.655956	0.516649	-0.208185	-96.6028	0.528003	0.85565	0.733284
Smoking_yes_vs_no	L-Phenylalanine	15	26	-536.166	-412.325	-0.125635	0.901053	-0.0433071	-728.11	0.544603	0.959615	0.733284
Smoking_yes_vs_no	L-Glutarylcarnitine	15	26	31.9705	52.623	-0.100327	0.920639	-0.0301299	177.27	0.541989	0.963755	0.733284
Smoking_yes_vs_no	7-Methylguanosine	15	26	49.8662	53.8665	-0.0445009	0.964787	-0.0141071	-77.9231	0.51115	0.987896	0.733284
Smoking_yes_vs_no	Pimelylcarnitine	14	26	94.6108	-89.5769	0.508925	0.615609	0.177419	-308.414	0.488339	0.872612	0.733284
Smoking_yes_vs_no	Anandamide	15	26	27.1261	41.8429	-0.129982	0.897567	-0.0436396	-97.659	0.488371	0.959615	0.733284
Smoking_yes_vs_no	3-Hydroxydodecanoylcarnitine	15	23	-76.7306	66.2743	-1.8741	0.0693836	-0.548661	-81.565	0.463289	0.49172	0.733284
Smoking_yes_vs_no	Hydroxykynurenine	15	26	-15.1847	-39.9109	0.165868	0.869488	0.0551356	130.401	0.501513	0.958796	0.733284
Smoking_yes_vs_no	L-Palmitoylcarnitine	5	18	-103.788	199.664	-1.05065	0.30801	-0.275761	484.135	0.53881	0.762285	0.733284
Smoking_yes_vs_no	Vitamin K2	10	19	-47.7105	56.7494	-1.33894	0.193126	-0.401784	84.2091	0.504275	0.716482	0.733284
Smoking_yes_vs_no	Lysine	15	26	-574.795	814.122	-0.281466	0.780496	-0.0937344	-4166.23	0.500547	0.908491	0.733284
Smoking_yes_vs_no	Pyruvic acid	15	26	-125.227	-147.76	0.119097	0.90607	0.0395303	131.338	0.525537	0.959615	0.733284
Smoking_yes_vs_no	Phenylpropiolic acid	15	26	90.9433	-15.6992	0.379791	0.706524	0.118112	244.198	0.518336	0.901609	0.733284
Smoking_yes_vs_no	Xanthine	15	26	144.129	87.9677	0.344384	0.734275	0.128715	128.302	0.493067	0.908491	0.733284
Smoking_yes_vs_no	Ascorbic acid	15	26	-77.9632	55.7889	-0.448024	0.657839	-0.151018	-258.146	0.491023	0.888829	0.733284
Smoking_yes_vs_no	PI(36:4)	11	21	-189.64	97.3177	-2.35637	0.0275224	-0.64496	-148.753	0.516758	0.351518	0.733284
Smoking_yes_vs_no	PI(36:1)	4	16	-86.9332	-33.821	-1.06252	0.329878	-0.505408	-50.2408	0.543408	0.762285	0.733284
Smoking_yes_vs_no	Trimethylamine-N-oxide	15	26	-20.8684	36.29	-0.610109	0.545813	-0.187307	-63.0277	0.578347	0.86855	0.751473
Smoking_yes_vs_no	Sarcosine	15	26	-937.047	-232.552	-0.392097	0.698219	-0.132747	-1211.71	0.580321	0.901478	0.751473
Smoking_yes_vs_no	Creatinine	15	26	322.794	-65.9421	0.66964	0.507808	0.20957	-412.571	0.585991	0.85565	0.751473
Smoking_yes_vs_no	L-Lysine	15	26	-622.309	859.161	-0.299201	0.767068	-0.0995492	-3532.37	0.571723	0.908491	0.751473
Smoking_yes_vs_no	Glycine	15	26	-76.298	102.141	-0.600083	0.55254	-0.186735	-220.108	0.584289	0.86855	0.751473
Smoking_yes_vs_no	a-ketoglutarate.1	15	26	26.9662	-24.8497	0.418811	0.678081	0.130665	93.2343	0.578254	0.898851	0.751473
Smoking_yes_vs_no	Inosine	13	25	-52.2448	133.013	-1.48502	0.147691	-0.384262	-109.044	0.588873	0.683631	0.751473
Smoking_yes_vs_no	Serotonin	15	26	57.3129	-89.8561	0.513574	0.611799	0.172069	-182.4	0.60039	0.872612	0.760494
Smoking_yes_vs_no	Zymosterol	15	26	17.0331	191.564	-0.387861	0.70115	-0.129077	267.258	0.60916	0.901478	0.765929
Smoking_yes_vs_no	L-Glutamic acid	15	26	43.1081	27.9512	0.022632	0.98211	0.00753396	-375.5	0.655903	0.990991	0.775824
Smoking_yes_vs_no	Normetanephrine	15	26	-196.718	-1.48888	-0.653028	0.520396	-0.231617	-158.604	0.64698	0.85565	0.775824
Smoking_yes_vs_no	Oleoylcarnitine	5	21	-134.682	246.041	-1.01614	0.321649	-0.243148	539.261	0.625269	0.762285	0.775824
Smoking_yes_vs_no	2-Hydroxyglutarate	15	26	11.9268	40.8859	-0.325109	0.746907	-0.0957745	-57.0693	0.651943	0.908491	0.775824
Smoking_yes_vs_no	Orotic acid	15	25	-21.1719	-4.5595	-0.0733533	0.942279	-0.0274549	-123.121	0.640009	0.970661	0.775824
Smoking_yes_vs_no	N-carbamoyl-L-aspartate	15	26	83.7534	-85.994	1.57894	0.125309	0.515664	64.3204	0.638919	0.659884	0.775824
Smoking_yes_vs_no	Hexose Disaccharide Pool	13	21	-271.012	122.188	-1.16941	0.25577	-0.323615	271.009	0.635085	0.741301	0.775824
Smoking_yes_vs_no	PI(36:2)	8	19	-119.228	-32.0272	-1.40862	0.179331	-0.561871	-36.4255	0.657862	0.71637	0.775824
Smoking_yes_vs_no	PI(38:5)	5	19	-126.84	3.55512	-2.13004	0.0533967	-0.751452	-55.2132	0.647141	0.462952	0.775824
Smoking_yes_vs_no	3-methylphenylacetic acid	15	26	16.0309	-22.4339	0.123895	0.902498	0.0438474	-156.488	0.668982	0.959615	0.783534
Smoking_yes_vs_no	2-Octenoylcarnitine	15	26	-285.092	-207.878	-0.495637	0.622985	-0.14387	-90.2062	0.701376	0.872612	0.79798
Smoking_yes_vs_no	Suberylcarnitine	14	25	-124.678	224.011	-1.12913	0.269817	-0.28123	205.874	0.708265	0.756373	0.79798
Smoking_yes_vs_no	3-Hydroxy-cis-5-tetradecenoylcarnitine	13	23	-36.0693	67.2929	-1.06854	0.296682	-0.277744	65.8735	0.709315	0.762285	0.79798
Smoking_yes_vs_no	Dodecanoylcarnitine	12	23	-159.921	205.324	-1.74874	0.0929717	-0.455204	-147.391	0.70875	0.567791	0.79798
Smoking_yes_vs_no	Linoleylcarnitine	5	16	-200.374	405.833	-1.01178	0.327678	-0.284706	536.464	0.705027	0.762285	0.79798
Smoking_yes_vs_no	L-Threonine	15	26	-211.989	-171.054	-0.208077	0.836339	-0.06253	104.098	0.698814	0.934732	0.79798
Smoking_yes_vs_no	Cinnamoylglycine	12	19	-58.2403	20.6595	-0.620562	0.539792	-0.210838	-67.4753	0.731552	0.86855	0.817617
Smoking_yes_vs_no	O-Phosphoethanolamine	14	23	-2.21171	35.9329	-0.778665	0.442136	-0.254696	-21.0826	0.748337	0.85565	0.830945
Smoking_yes_vs_no	3-Aminoisobutyric acid	15	26	-1.63196	-4.8434	0.0290208	0.977005	0.00864925	-45.7172	0.771497	0.990991	0.84202
Smoking_yes_vs_no	Dimethyl-L-arginine	15	26	40.2506	51.9498	-0.0918192	0.927477	-0.0299454	-44.6994	0.786464	0.963755	0.84202
Smoking_yes_vs_no	Adipoylcarnitine	14	26	-148.591	97.787	-1.36189	0.183605	-0.339725	-89.9047	0.781792	0.71637	0.84202
Smoking_yes_vs_no	Agmatine	11	23	-15.5603	15.921	-0.256016	0.800087	-0.0866191	-47.8879	0.771648	0.908491	0.84202
Smoking_yes_vs_no	Nicotinic acid	15	26	-17.1425	-45.4779	0.805975	0.428771	0.286176	10.9466	0.787855	0.85565	0.84202
Smoking_yes_vs_no	Suberic Acid	15	26	-359.32	372.348	-1.2608	0.218315	-0.312244	282.72	0.775783	0.741301	0.84202
Smoking_yes_vs_no	Riboflavin	15	26	-20.6545	-22.1007	0.0154774	0.98775	0.00492452	-23.9819	0.85279	0.990991	0.905758
Smoking_yes_vs_no	Azelaic acid	13	25	-917.556	1547.12	-1.90529	0.0684089	-0.469511	-411.772	0.85862	0.49172	0.906321
Smoking_yes_vs_no	Cytidine monophosphate	12	24	55.0037	4.0186	1.14776	0.268118	0.466758	-6.67177	0.878528	0.756373	0.916026
Smoking_yes_vs_no	Arginine	15	26	76.9436	-31.8281	0.523993	0.60484	0.178267	38.6399	0.876732	0.872612	0.916026
Smoking_yes_vs_no	Histamine	11	21	44.3215	0.915251	0.444396	0.66299	0.184988	-15.3936	0.886478	0.888829	0.918713
Smoking_yes_vs_no	Allantoin	8	8	-19.3719	-14.5352	-0.089539	0.929939	-0.0447695	6.48906	0.916096	0.963755	0.938038
Smoking_yes_vs_no	Uridine	15	26	0.322559	18.4908	-0.281747	0.780382	-0.0952295	-9.3047	0.911732	0.908491	0.938038
Smoking_yes_vs_no	Quinolinic Acid	13	20	2.99386	10.2191	-0.159018	0.874691	-0.0523615	5.26962	0.941908	0.958796	0.958728
Smoking_yes_vs_no	Pyroglutamic acid	14	25	-3.33838	17.7318	-0.536187	0.595633	-0.170239	2.74607	0.958212	0.872612	0.969552
Smoking_yes_vs_no	2-Arachidonylglycerol	7	19	-95.1596	64.7151	-0.978353	0.337888	-0.28293	-9.29626	0.977589	0.770384	0.98334
Smoking_yes_vs_no	BMP(18:1/16:0)	4	13	3.54789	-24.1024	0.268464	0.802235	0.1946	-1.70237	0.988341	0.908491	0.988341
Symptoms_pos_vs_neg	Urea	27	14	13.8193	-478.113	2.57357	0.0139813	0.699528	509.765	0.140151	0.0531289	0.633603
Symptoms_pos_vs_neg	Sarcosine	27	14	879.354	-3131.76	3.29027	0.00243661	0.810662	3973.18	0.121306	0.041666	0.633603
Symptoms_pos_vs_neg	Alanine	27	14	904.725	-3130.81	3.32223	0.00224253	0.818052	4054.28	0.112343	0.041666	0.633603
Symptoms_pos_vs_neg	beta-Alanine	27	14	259.178	-340.617	2.30372	0.0267152	0.641419	454.296	0.343845	0.0815769	0.633603
Symptoms_pos_vs_neg	L-Serine	27	14	757.785	-1277.42	2.89568	0.00617905	0.776371	1214.78	0.368003	0.045153	0.633603
Symptoms_pos_vs_neg	L-Proline	27	14	440.372	-3386.86	1.22703	0.227842	0.359545	7710.19	0.137059	0.390633	0.633603
Symptoms_pos_vs_neg	Betaine	25	14	60.7397	-188.715	2.47233	0.0182587	0.731227	282.987	0.113368	0.0624449	0.633603
Symptoms_pos_vs_neg	Guanidinoacetic acid	27	14	480.2	-6445.26	3.13776	0.0032697	0.826563	4974.09	0.235503	0.0424665	0.633603
Symptoms_pos_vs_neg	L-Valine	27	14	188.371	-1480.35	3.06988	0.00397347	0.796716	1215.24	0.245559	0.0424665	0.633603
Symptoms_pos_vs_neg	Purine	27	14	-35.9912	-185.928	1.81464	0.0789223	0.555984	146.715	0.296873	0.175269	0.633603
Symptoms_pos_vs_neg	Pipecolic acid	27	14	2675.42	-4424.36	2.36857	0.0234729	0.698626	5904.63	0.264457	0.0748464	0.633603
Symptoms_pos_vs_neg	Hydroxyproline	27	14	-4.27861	-597.595	2.24305	0.0309004	0.582009	768.731	0.136226	0.0880662	0.633603
Symptoms_pos_vs_neg	L-leucine + L-Isoleucine	27	14	1727.73	-7786.05	3.36038	0.00193194	0.841296	6590.87	0.246187	0.041666	0.633603
Symptoms_pos_vs_neg	Ornithine	27	14	68.5837	-204.704	2.55065	0.0154557	0.765999	223.745	0.215354	0.0562324	0.633603
Symptoms_pos_vs_neg	Methylcysteine	27	14	614.965	-836.827	2.53793	0.0153477	0.713442	1381.65	0.190356	0.0562324	0.633603
Symptoms_pos_vs_neg	Adenine	27	14	16.333	-233.873	2.24332	0.0308767	0.640426	270.714	0.176609	0.0880662	0.633603
Symptoms_pos_vs_neg	1-Methylnicotinamide	27	14	238.499	103.133	0.501644	0.61887	0.129875	853.952	0.0902731	0.731343	0.633603
Symptoms_pos_vs_neg	O-Phosphoethanolamine	24	13	49.233	-29.6999	1.77428	0.0851051	0.540962	178.337	0.0418714	0.184215	0.633603
Symptoms_pos_vs_neg	L-Glutamine	27	14	3661.32	-6182.62	2.69886	0.0103252	0.762385	9209.33	0.172438	0.0481703	0.633603
Symptoms_pos_vs_neg	L-Lysine	27	14	3919.43	-6630.07	2.69369	0.0104228	0.754125	10138	0.166941	0.0481703	0.633603
Symptoms_pos_vs_neg	L-Glutamic acid	27	14	569.836	-1000.87	3.1239	0.00336126	0.843903	1433.86	0.147157	0.0424665	0.633603
Symptoms_pos_vs_neg	L-Methionine	27	14	380.126	-1687.71	3.30712	0.00204483	0.87834	1395.49	0.245872	0.041666	0.633603
Symptoms_pos_vs_neg	L-Histidine	27	14	-404.686	393.666	-1.38968	0.176356	-0.459569	-776.825	0.363793	0.324268	0.633603
Symptoms_pos_vs_neg	DL-2-Aminooctanoic acid	27	14	139.673	-217.361	1.35616	0.183794	0.40238	559.083	0.187907	0.334348	0.633603
Symptoms_pos_vs_neg	7-methylguanine	27	14	133.536	-193.95	2.82312	0.00748067	0.749453	295.374	0.19118	0.0467077	0.633603
Symptoms_pos_vs_neg	L-Phenylalanine	27	14	275.091	-1870.74	3.06592	0.00397336	0.805737	1944.97	0.168035	0.0424665	0.633603
Symptoms_pos_vs_neg	1-Methylhistidine	27	14	54.0202	-128.445	0.844375	0.404189	0.249625	574.206	0.107753	0.548542	0.633603
Symptoms_pos_vs_neg	Citrulline	27	14	1020.56	-2543.08	2.98835	0.00489319	0.843556	2286.84	0.295572	0.045153	0.633603
Symptoms_pos_vs_neg	L-Tyrosine	27	14	81.0504	-1502.7	2.94378	0.00543861	0.799998	1245.81	0.215996	0.045153	0.633603
Symptoms_pos_vs_neg	Acetyllysine	27	14	66.428	-490.052	2.87034	0.00660132	0.76942	355.994	0.314283	0.045153	0.633603
Symptoms_pos_vs_neg	Homoarginine	27	14	-58.7164	-360.093	1.83901	0.075035	0.560285	312.094	0.243661	0.168829	0.633603
Symptoms_pos_vs_neg	N-acetyl-glutamate	27	14	1094.04	-1923.58	2.00886	0.0528972	0.61223	3023.95	0.228951	0.1274	0.633603
Symptoms_pos_vs_neg	L-Acetylcarnitine	27	14	777.77	-2247.42	2.18006	0.0353561	0.595465	2621.51	0.302967	0.0975144	0.633603
Symptoms_pos_vs_neg	Cystine	27	14	360.125	-647.951	2.15185	0.0381123	0.624288	1179.89	0.152476	0.100265	0.633603
Symptoms_pos_vs_neg	Tiglylcarnitine	27	14	377.496	-598.019	2.61038	0.012853	0.73463	823.525	0.225211	0.0531289	0.633603
Symptoms_pos_vs_neg	Glycerophosphocholine	27	14	2129.88	-1549.66	1.52113	0.137218	0.450074	4293.24	0.27747	0.266639	0.633603
Symptoms_pos_vs_neg	Hexanoylcarnitine	27	14	288.09	-245.922	1.70309	0.0966102	0.450986	1525.24	0.0102867	0.203955	0.633603
Symptoms_pos_vs_neg	3-Hydroxyhexanoylcarnitine	27	14	97.793	-72.0868	1.50161	0.141489	0.425148	280.234	0.167549	0.271849	0.633603
Symptoms_pos_vs_neg	L-Glutarylcarnitine	27	14	168.269	-192.536	2.00462	0.051982	0.544447	606.15	0.0728944	0.126985	0.633603
Symptoms_pos_vs_neg	1-Methyladenosine	27	14	101.736	-147.1	2.65014	0.0115771	0.730236	263.197	0.12273	0.0494922	0.633603
Symptoms_pos_vs_neg	2-Octenoylcarnitine	27	14	-125.978	-448.557	2.51104	0.0170038	0.62676	572.986	0.0347949	0.0605759	0.633603
Symptoms_pos_vs_neg	Adipoylcarnitine	26	14	103.556	-159.305	1.45434	0.156426	0.363147	710.945	0.0527826	0.290747	0.633603
Symptoms_pos_vs_neg	7-Methylguanosine	27	14	110.26	-59.1778	2.27199	0.0286959	0.624441	130.321	0.352761	0.0846035	0.633603
Symptoms_pos_vs_neg	5-Methylthioadenosine	27	14	-151.966	-266.667	2.40176	0.0212471	0.670582	107.039	0.200364	0.0698703	0.633603
Symptoms_pos_vs_neg	Pimelylcarnitine	26	14	268.2	-569.832	3.39631	0.00178074	0.874802	704.817	0.166045	0.041666	0.633603
Symptoms_pos_vs_neg	Suberylcarnitine	26	13	208.115	-119.708	1.10439	0.279828	0.264031	1133.92	0.0693288	0.437596	0.633603
Symptoms_pos_vs_neg	Cytidine monophosphate	23	13	24.6316	14.6127	0.244966	0.808812	0.0895437	73.6284	0.267985	0.886583	0.633603
Symptoms_pos_vs_neg	Anandamide	27	14	112.821	-110.812	2.69968	0.0103624	0.700366	149.512	0.36973	0.0481703	0.633603
Symptoms_pos_vs_neg	3-Hydroxydodecanoylcarnitine	26	12	47.4865	-71.7749	1.50079	0.143462	0.451254	311.645	0.0256106	0.272577	0.633603
Symptoms_pos_vs_neg	3-Hydroxy-cis-5-tetradecenoylcarnitine	23	13	69.719	-40.3616	1.14071	0.266143	0.296172	360.33	0.0527056	0.433434	0.633603
Symptoms_pos_vs_neg	BMP(18:1/16:0)	10	7	26.5911	-80.7215	1.7309	0.104498	0.818638	91.7308	0.370122	0.21529	0.633603
Symptoms_pos_vs_neg	Agmatine	21	13	22.2323	-20.9121	0.362743	0.719257	0.118816	221.844	0.264128	0.819953	0.633603
Symptoms_pos_vs_neg	N-acetyl spermine	27	14	552.721	-674.549	2.57719	0.0138763	0.711238	1000.52	0.252048	0.0531289	0.633603
Symptoms_pos_vs_neg	9-Decenoylcarnitine	27	14	212.663	-865.221	2.29597	0.0272552	0.645631	2006.96	0.0171979	0.0817655	0.633603
Symptoms_pos_vs_neg	Decanoylcarnitine	27	14	101.645	-95.7945	0.511839	0.611689	0.14295	1285.04	0.0446131	0.731343	0.633603
Symptoms_pos_vs_neg	Aspartylglycosamine	26	13	62.2208	-99.0217	2.80081	0.0081605	0.739533	108.417	0.338233	0.0467077	0.633603
Symptoms_pos_vs_neg	Dodecenoylcarnitine	26	12	12.3022	8.43578	0.0323775	0.974359	0.00928783	287.819	0.150114	0.980091	0.633603
Symptoms_pos_vs_neg	Dodecanoylcarnitine	21	14	229.081	-143.379	1.61496	0.119375	0.46544	987.783	0.023391	0.240155	0.633603
Symptoms_pos_vs_neg	Cholesterol	22	10	-216.294	-57.2431	-1.07593	0.299375	-0.444543	-198.647	0.307517	0.451632	0.633603
Symptoms_pos_vs_neg	Myristoylcarnitine	27	14	-29.4937	139.652	-0.933767	0.35752	-0.28821	281.014	0.316771	0.501114	0.633603
Symptoms_pos_vs_neg	2-Arachidonylglycerol	15	11	162.348	-170.159	1.80698	0.0920663	0.611661	759.248	0.0312258	0.196792	0.633603
Symptoms_pos_vs_neg	Zymosterol	27	14	-271.081	896.809	-2.68367	0.0136108	-0.949384	-1194.24	0.0484625	0.0531289	0.633603
Symptoms_pos_vs_neg	L-Palmitoylcarnitine	16	7	228.137	-82.1703	0.954035	0.35509	0.282595	898.243	0.203927	0.501114	0.633603
Symptoms_pos_vs_neg	Linoleylcarnitine	14	7	488.389	-192.283	0.993739	0.338481	0.321103	2724.14	0.0588681	0.490511	0.633603
Symptoms_pos_vs_neg	Oleoylcarnitine	16	10	362.974	-131.414	1.00613	0.330287	0.318234	1430.17	0.112003	0.482727	0.633603
Symptoms_pos_vs_neg	Leucine+isoleucine	27	14	1853.19	-8405.73	3.52339	0.00120514	0.890556	7429.94	0.200634	0.041666	0.633603
Symptoms_pos_vs_neg	Histidine	27	14	131.81	-327.68	3.9217	0.000383393	0.996341	394.743	0.101452	0.041666	0.633603
Symptoms_pos_vs_neg	Tyrosine	27	14	22.2029	-1865.45	2.9368	0.00554021	0.800732	1480.61	0.217917	0.045153	0.633603
Symptoms_pos_vs_neg	Tryptophan	27	14	-133.958	-576.338	1.98123	0.0559653	0.60126	320.556	0.369675	0.132917	0.633603
Symptoms_pos_vs_neg	Arginine	27	14	163.508	-292.006	2.8038	0.00794237	0.797637	328.858	0.264316	0.0467077	0.633603
Symptoms_pos_vs_neg	Methionine	27	14	295.9	-1344.9	3.59065	0.000943201	0.932158	1184.2	0.18968	0.041666	0.633603
Symptoms_pos_vs_neg	Lysine	27	14	3920.06	-6664.03	2.71138	0.00997703	0.760777	9112.45	0.210316	0.0481703	0.633603
Symptoms_pos_vs_neg	Aspartic acid	27	14	306.131	-489.549	2.67237	0.0109402	0.731191	741.039	0.182779	0.0487164	0.633603
Symptoms_pos_vs_neg	Glycine	27	14	242.593	-359.915	2.30859	0.0265915	0.659326	685.54	0.146211	0.0815769	0.633603
Symptoms_pos_vs_neg	Asparagine	27	14	-464.732	-134.424	-1.06236	0.301964	-0.406309	-445.479	0.273145	0.451632	0.633603
Symptoms_pos_vs_neg	Guanidoacetic acid	22	7	19.4917	-51.3762	2.4639	0.0236357	0.806274	45.9271	0.370528	0.0748464	0.633603
Symptoms_pos_vs_neg	Taurine	27	14	332.423	505.532	-0.167548	0.868656	-0.0619985	1301.62	0.349521	0.925626	0.633603
Symptoms_pos_vs_neg	Oxaloacetic acid	27	14	153.395	-235.895	2.67763	0.0111108	0.682182	292.374	0.316448	0.0487164	0.633603
Symptoms_pos_vs_neg	a-ketoglutarate	27	14	110.44	-67.1797	0.926787	0.361665	0.294776	280.707	0.353377	0.50176	0.633603
Symptoms_pos_vs_neg	Phenylpropiolic acid	27	14	175.605	-270.384	1.59527	0.121494	0.507932	527.922	0.235832	0.241576	0.633603
Symptoms_pos_vs_neg	a-ketoglutarate.1	27	14	53.2875	-120.026	1.46332	0.152977	0.446291	216.424	0.274388	0.287462	0.633603
Symptoms_pos_vs_neg	2-Hydroxyglutarate	27	14	87.38	-79.8089	2.0495	0.0472872	0.573375	155.77	0.297821	0.11719	0.633603
Symptoms_pos_vs_neg	3-methylphenylacetic acid	27	14	209.595	-428.705	2.92668	0.00571262	0.777721	532.441	0.217217	0.045153	0.633603
Symptoms_pos_vs_neg	Orotic acid	26	14	105.119	-226.047	2.10306	0.0422702	0.568006	309.139	0.312891	0.106297	0.633603
Symptoms_pos_vs_neg	Quinolinic Acid	24	9	-4.82285	39.8945	-0.607221	0.558287	-0.327605	-108.364	0.154226	0.69179	0.633603
Symptoms_pos_vs_neg	Homogentisic acid	27	14	230.461	-585.435	3.08209	0.00377446	0.822223	497.28	0.322537	0.0424665	0.633603
Symptoms_pos_vs_neg	Uric acid	27	14	1811.54	-4732.59	3.16606	0.00306613	0.822425	4153.63	0.298975	0.0424665	0.633603
Symptoms_pos_vs_neg	Suberic Acid	27	14	315.145	-301.262	1.09836	0.281495	0.262085	2123.23	0.0660443	0.437596	0.633603
Symptoms_pos_vs_neg	Ascorbic acid	27	14	214.989	-394.546	2.75072	0.00901377	0.728045	652.927	0.136669	0.0467077	0.633603
Symptoms_pos_vs_neg	N-carbamoyl-L-aspartate	27	14	69.1213	-203.273	2.89883	0.00653735	0.870805	190.491	0.238841	0.045153	0.633603
Symptoms_pos_vs_neg	Azelaic acid	24	14	894.833	376.701	0.311646	0.757205	0.0963245	3666.19	0.202064	0.840792	0.633603
Symptoms_pos_vs_neg	2-Keto-L-gluconate	22	8	81.2144	-67.8181	1.23285	0.230761	0.306092	804.322	0.0133646	0.390695	0.633603
Symptoms_pos_vs_neg	Xanthurenic acid	25	12	-26.1201	-48.31	0.195561	0.846826	0.0695894	143.528	0.333771	0.916502	0.633603
Symptoms_pos_vs_neg	Uridine	27	14	36.0214	-34.7842	1.24458	0.222024	0.376894	130.642	0.186559	0.387409	0.633603
Symptoms_pos_vs_neg	Pseudouridine	27	14	56.6602	-72.369	2.75382	0.00890345	0.742522	151.232	0.101038	0.0467077	0.633603
Symptoms_pos_vs_neg	Inosine	25	13	9.80803	184.687	-1.05106	0.303729	-0.362044	269.159	0.341409	0.451632	0.633603
Symptoms_pos_vs_neg	11,12-DiHETrE	27	14	212.676	-450.394	3.29674	0.00226844	0.829364	410.824	0.292087	0.041666	0.633603
Symptoms_pos_vs_neg	Hexose Disaccharide Pool	23	11	85.8814	-266.589	1.14348	0.264802	0.289124	1194.14	0.0591936	0.433434	0.633603
Symptoms_pos_vs_neg	Orotidine monophosphate	14	10	-20.1432	16.5784	-0.922507	0.366278	-0.358733	-54.7374	0.355377	0.50176	0.633603
Symptoms_pos_vs_neg	Gluconolactone	26	14	22.6854	-60.2852	1.86678	0.0718786	0.597212	89.8712	0.236669	0.163883	0.633603
Symptoms_pos_vs_neg	Pyruvic acid	27	14	-3.09313	-402.618	2.43483	0.0206129	0.745334	216.26	0.377118	0.069114	0.638486
Symptoms_pos_vs_neg	Methionine sulfoxide	27	14	-41.0217	-254.922	2.16019	0.0370028	0.59768	153.598	0.396789	0.0988668	0.656181
Symptoms_pos_vs_neg	Serotonin	27	14	181.187	-454.901	2.77957	0.00847184	0.794395	345.216	0.402918	0.0467077	0.656181
Symptoms_pos_vs_neg	Riboflavin	27	14	-44.1227	21.9197	-0.798435	0.429601	-0.226229	-128.616	0.401957	0.57392	0.656181
Symptoms_pos_vs_neg	Indole-3-carboxylic acid	27	14	89.1266	-137.309	2.12172	0.0403226	0.588864	170.43	0.395029	0.103589	0.656181
Symptoms_pos_vs_neg	Vitamin K2	21	8	18.3172	27.0592	-0.104761	0.917426	-0.0329883	112.479	0.409474	0.950787	0.660566
Symptoms_pos_vs_neg	L-Carnitine	27	14	767.023	-3416.24	2.88862	0.00631621	0.765795	2191.73	0.41649	0.045153	0.665606
Symptoms_pos_vs_neg	Propionylcarnitine	27	14	206.828	-850.594	2.12424	0.0405877	0.619969	638.225	0.437562	0.103589	0.692807
Symptoms_pos_vs_neg	N-acetyl-glutamine	27	14	297.267	-490.983	3.01636	0.00448748	0.822589	363.936	0.448272	0.0451387	0.694251
Symptoms_pos_vs_neg	L-Tryptophan	27	14	-416.05	-2636.68	1.91814	0.0638123	0.582501	1382.39	0.450654	0.147458	0.694251
Symptoms_pos_vs_neg	glucose-1-phosphate	27	14	33.3624	37.1129	-0.0211789	0.983331	-0.00805651	178.817	0.445084	0.983331	0.694251
Symptoms_pos_vs_neg	Hydroxykynurenine	27	14	-86.7999	77.0102	-1.17828	0.247982	-0.37103	-167.046	0.467611	0.414996	0.713942
Symptoms_pos_vs_neg	Threonine	27	14	275.197	-2346.97	2.1786	0.03664	0.661795	1421.19	0.481512	0.0988668	0.715238
Symptoms_pos_vs_neg	Butyrylcarnitine	27	14	-413.816	93.2173	-0.954747	0.34887	-0.321197	522.178	0.48314	0.49714	0.715238
Symptoms_pos_vs_neg	Octanoylcarnitine	27	14	-46.6302	-220.982	0.473587	0.639936	0.159646	359.402	0.477801	0.744416	0.715238
Symptoms_pos_vs_neg	Pyroglutamic acid	26	13	7.84563	14.8132	-0.15621	0.877367	-0.0561189	-43.8376	0.485191	0.925626	0.715238
Symptoms_pos_vs_neg	Indole	27	14	-107.386	-409.035	1.67992	0.102272	0.506204	195.17	0.493998	0.213275	0.721997
Symptoms_pos_vs_neg	Saccharopine	24	11	-25.7374	-31.3058	0.088691	0.930599	0.0380986	-48.5418	0.516456	0.952889	0.737265
Symptoms_pos_vs_neg	Glutamic acid	27	14	324.067	-248.201	1.77369	0.0840138	0.470184	387.123	0.52169	0.184184	0.737265
Symptoms_pos_vs_neg	Nicotinic acid	27	14	-11.1838	-81.2571	2.75352	0.00890749	0.74534	31.3112	0.517593	0.0467077	0.737265
Symptoms_pos_vs_neg	Mevalonic acid	19	9	10.4742	-62.5883	2.52621	0.0180684	0.826028	31.3119	0.517495	0.0624449	0.737265
Symptoms_pos_vs_neg	Glyceric acid	27	14	4.61876	-22.3606	0.648981	0.522746	0.224639	37.0084	0.539867	0.657829	0.756699
Symptoms_pos_vs_neg	Xanthosine	27	14	153.619	-121.288	2.18425	0.0353068	0.565794	136.93	0.553488	0.0975144	0.769484
Symptoms_pos_vs_neg	Acetylcholine	27	14	544.39	-645.823	3.76959	0.000632649	0.939703	367.184	0.564901	0.041666	0.773591
Symptoms_pos_vs_neg	PI(36:1)	15	5	-57.8404	-4.25234	-0.860638	0.424514	-0.512186	-47.389	0.565491	0.57159	0.773591
Symptoms_pos_vs_neg	Trimethylamine-N-oxide	27	14	-26.6761	96.4835	-1.1282	0.272275	-0.409774	-74.764	0.579082	0.437596	0.785507
Symptoms_pos_vs_neg	Creatinine	27	14	280.557	-317.688	1.0761	0.289598	0.324779	-486.504	0.589005	0.442453	0.785507
Symptoms_pos_vs_neg	Homocysteine	27	14	3.62672	-65.5589	0.639172	0.527032	0.192167	98.7944	0.58733	0.657829	0.785507
Symptoms_pos_vs_neg	Itaconic acid	27	14	22.034	-38.4158	0.663803	0.512339	0.215396	-76.663	0.592575	0.653805	0.785507
Symptoms_pos_vs_neg	Allantoin	13	3	6.20753	-117.318	3.36339	0.00874849	1.30052	-63.4024	0.598419	0.0467077	0.787151
Symptoms_pos_vs_neg	N-Acetylornithine	27	14	189.004	-145.25	1.25549	0.219483	0.402069	203.239	0.61854	0.386923	0.807407
Symptoms_pos_vs_neg	Ketoleucine	27	14	60.4345	-99.5579	1.57613	0.12542	0.494515	78.8009	0.6362	0.246515	0.824168
Symptoms_pos_vs_neg	Ceramide(d18:1/12:0)	25	14	-20.9752	24.592	-1.10113	0.278369	-0.333007	-31.6387	0.647025	0.437596	0.831889
Symptoms_pos_vs_neg	Citraconic acid	27	14	48.8087	-73.4156	1.17137	0.249968	0.357393	76.7379	0.661398	0.414996	0.844023
Symptoms_pos_vs_neg	3-Aminoisobutyric acid	27	14	34.3878	-77.0627	0.988924	0.330113	0.303411	-80.5478	0.667613	0.482727	0.845644
Symptoms_pos_vs_neg	Malonylcarnitine	27	14	10.3254	-113.731	1.09921	0.278439	0.294541	-81.4868	0.700197	0.437596	0.880395
Symptoms_pos_vs_neg	Dimethyl-L-arginine	27	14	82.1114	-18.7539	0.913544	0.366784	0.260205	-73.7956	0.707512	0.50176	0.883099
Symptoms_pos_vs_neg	L-Kynurenine	27	14	-69.2102	-211.619	0.780878	0.440883	0.243888	100.88	0.723167	0.583185	0.896098
Symptoms_pos_vs_neg	Histamine	21	11	40.0847	-30.4566	0.966112	0.341756	0.302683	51.6771	0.75289	0.491095	0.912013
Symptoms_pos_vs_neg	S-adenosyl-L-homoCysteine	27	14	77.6027	-3.88757	1.31076	0.198116	0.379509	30.3951	0.758617	0.352894	0.912013
Symptoms_pos_vs_neg	Nicotinamide Riboside	17	6	27.0252	2.54603	0.205763	0.842961	0.115917	-49.7357	0.762678	0.916502	0.912013
Symptoms_pos_vs_neg	Cinnamoylglycine	20	11	7.46684	-41.4263	0.389815	0.699646	0.130192	69.7793	0.743533	0.802949	0.912013
Symptoms_pos_vs_neg	PI(36:2)	18	9	-77.2057	-19.1817	-0.792885	0.443357	-0.367048	-31.5983	0.752444	0.583185	0.912013
Symptoms_pos_vs_neg	Hypoxanthine	27	14	-8.02867	624.834	-1.34989	0.197655	-0.580056	-155.261	0.769477	0.352894	0.913753
Symptoms_pos_vs_neg	Dimethylglycine	27	14	-23.3549	-1014.22	2.59225	0.0138341	0.653961	186.756	0.798245	0.0531289	0.936926
Symptoms_pos_vs_neg	24,25-Dihydrolanosterol	27	14	-75.3845	180.048	-0.678627	0.503704	-0.229392	139.272	0.804972	0.647619	0.936926
Symptoms_pos_vs_neg	Plasmalogen(p16:0/20:4)	24	14	-249.859	-233.335	-0.152359	0.880441	-0.056891	29.7651	0.805427	0.925626	0.936926
Symptoms_pos_vs_neg	Isovalerylcarnitine	27	14	-96.502	-233.94	0.314248	0.755741	0.102576	152.479	0.814001	0.840792	0.938654
Symptoms_pos_vs_neg	L-Lactic acid	27	13	515.339	-278.261	1.08066	0.289794	0.352823	259.215	0.823352	0.442453	0.938654
Symptoms_pos_vs_neg	Xanthine	27	14	81.8013	160.033	-0.43714	0.667941	-0.179617	48.9479	0.825986	0.771742	0.938654
Symptoms_pos_vs_neg	PI(38:4)	26	14	-194.13	-302.718	0.50005	0.620144	0.148957	76.7732	0.82887	0.731343	0.938654
Symptoms_pos_vs_neg	Dephospho-CoA	27	14	10.4951	-0.699023	0.278947	0.782171	0.0872163	11.8514	0.852614	0.862911	0.946734
Symptoms_pos_vs_neg	Pantothenic acid	27	14	-58.7639	-68.6835	0.091174	0.92799	0.0291718	-33.0465	0.844434	0.952889	0.946734
Symptoms_pos_vs_neg	Eicosapentaenoic acid	27	13	-36.156	1.89366	-0.317467	0.753428	-0.103603	-36.5034	0.850361	0.840792	0.946734
Symptoms_pos_vs_neg	Normetanephrine	27	14	-176.192	126.265	-1.22577	0.22844	-0.361986	71.3766	0.862711	0.390633	0.951765
Symptoms_pos_vs_neg	L-Threonine	27	14	-145.383	-264.42	0.496158	0.625221	0.18246	52.7075	0.869493	0.73228	0.953098
Symptoms_pos_vs_neg	PI(36:4)	20	12	5.75507	-13.1228	0.121943	0.903773	0.0404614	36.4178	0.885515	0.942349	0.958374
Symptoms_pos_vs_neg	PI(38:3)	22	13	-77.0319	-132.387	0.582737	0.564049	0.18133	22.9125	0.882186	0.693902	0.958374
Symptoms_pos_vs_neg	PC(16:0/18:2)	27	14	-643.488	-530.062	-0.350243	0.729527	-0.12419	55.6194	0.894507	0.826154	0.962017
Symptoms_pos_vs_neg	Methylguanidine	26	14	-109.666	-220.995	0.5231	0.604434	0.16117	39.9628	0.915848	0.731343	0.966248
Symptoms_pos_vs_neg	N-acetyl-L-alanine	27	14	-1855.01	-818.337	-0.57822	0.56903	-0.204627	-265.311	0.915082	0.69503	0.966248
Symptoms_pos_vs_neg	Creatine	27	14	-2031.52	-826.058	-0.643809	0.526384	-0.227586	-257.513	0.921043	0.657829	0.966248
Symptoms_pos_vs_neg	PI(40:5)	15	8	2.47731	-36.3746	0.769629	0.45082	0.300919	7.43282	0.920787	0.588475	0.966248
Symptoms_pos_vs_neg	p-Aminohippuric acid	26	14	-53.4533	21.8068	-0.512732	0.611766	-0.161101	-21.769	0.927399	0.731343	0.966983
Symptoms_pos_vs_neg	Hypotaurine	27	14	-166.73	64.8537	-1.64201	0.109024	-0.470838	15.8283	0.945607	0.221941	0.974089
Symptoms_pos_vs_neg	Indoleacrylic acid	27	14	-41.2719	-32.5827	-0.149603	0.882321	-0.0509569	-5.99933	0.944982	0.925626	0.974089
Symptoms_pos_vs_neg	PI(38:5)	14	10	-0.461001	-56.0196	0.732615	0.473115	0.308892	6.85214	0.952098	0.612899	0.974903
Symptoms_pos_vs_neg	3-Hydroxyisovaleryl carnitine	27	14	49.1111	-197.423	1.94585	0.0597498	0.491156	11.413	0.961444	0.139962	0.978612
Symptoms_pos_vs_neg	5-Hydroxyindoleacetic acid	27	14	-65.1324	-59.3274	-0.0464513	0.963268	-0.014778	3.50733	0.985218	0.974668	0.991013
Symptoms_pos_vs_neg	Malonic acid	25	13	-29.5962	-106.344	0.179047	0.859829	0.0678867	14.2045	0.979773	0.924721	0.991013
Symptoms_pos_vs_neg	Phosphorylcholine	20	12	-550.925	-581.419	0.078959	0.937976	0.0317107	0.605317	0.998838	0.954726	0.998838
Therapy_poly_vs_mono	PC(16:0/18:2)	22	19	-938.214	-218.649	-2.6289	0.0140912	-0.85891	-815.837	0.00467688	0.321967	0.266582
Therapy_poly_vs_mono	BMP(18:1/16:0)	4	13	-114.923	12.3503	-2.29389	0.0461648	-0.974949	-282.572	0.00442439	0.356028	0.266582
Therapy_poly_vs_mono	Inosine	21	17	169.301	-53.4817	1.57184	0.129369	0.466942	487.733	0.00423347	0.364548	0.266582
Therapy_poly_vs_mono	Xanthosine	22	19	258.112	-169.935	3.22445	0.00372541	0.942995	434.364	0.00664426	0.321967	0.284042
Therapy_poly_vs_mono	Urea	22	19	43.4933	-383.016	1.98422	0.0550182	0.600663	456.115	0.0678591	0.356028	0.511405
Therapy_poly_vs_mono	Methylguanidine	22	18	-292.969	27.7812	-1.49713	0.143012	-0.476398	-518.142	0.0416576	0.371253	0.511405
Therapy_poly_vs_mono	Trimethylamine-N-oxide	22	19	52.3331	-27.4112	0.852979	0.398916	0.262543	209.449	0.0275027	0.573233	0.511405
Therapy_poly_vs_mono	Threonine	22	19	741.361	-2196.69	2.507	0.017024	0.756892	2617.77	0.069444	0.321967	0.511405
Therapy_poly_vs_mono	Hydroxyproline	22	19	74.6955	-532.903	1.97029	0.0563356	0.599866	692.371	0.063257	0.356028	0.511405
Therapy_poly_vs_mono	1-Methylnicotinamide	22	19	407.501	-56.9313	1.55938	0.132175	0.456668	854.503	0.0176788	0.364548	0.511405
Therapy_poly_vs_mono	Citrulline	22	19	1327.65	-1960.85	2.5317	0.0156138	0.774637	2662.72	0.0905585	0.321967	0.511405
Therapy_poly_vs_mono	Serotonin	22	19	251.32	-368.716	2.55253	0.0149557	0.777293	497.014	0.0933961	0.321967	0.511405
Therapy_poly_vs_mono	L-Kynurenine	22	19	10.7432	-266.721	1.6298	0.113426	0.486238	339.197	0.0957015	0.364548	0.511405
Therapy_poly_vs_mono	S-adenosyl-L-homoCysteine	22	19	112.049	-22.3281	2.14879	0.0387646	0.648352	150.464	0.0309297	0.356028	0.511405
Therapy_poly_vs_mono	Ceramide(d18:1/12:0)	20	19	-41.6305	34.3431	-1.7763	0.084164	-0.570929	-86.2195	0.0846206	0.356028	0.511405
Therapy_poly_vs_mono	Phosphorylcholine	15	17	-948.867	-221.325	-2.38347	0.0243265	-0.821493	-768.968	0.0224826	0.321967	0.511405
Therapy_poly_vs_mono	Octanoylcarnitine	22	19	178.552	-435.837	1.89047	0.0661425	0.585473	703.751	0.050735	0.356028	0.511405
Therapy_poly_vs_mono	9-Decenoylcarnitine	22	19	224.929	-595.77	1.59489	0.119573	0.483114	1058.98	0.0912348	0.364548	0.511405
Therapy_poly_vs_mono	Decanoylcarnitine	22	19	168.803	-121.598	0.708143	0.484326	0.210965	811.423	0.0843737	0.652124	0.511405
Therapy_poly_vs_mono	Cholesterol	16	16	-277.771	-55.4108	-1.81087	0.0824294	-0.640239	-275.504	0.0766767	0.356028	0.511405
Therapy_poly_vs_mono	Arginine	22	19	219.531	-237.003	2.59387	0.0133077	0.806167	417.594	0.0473613	0.321967	0.511405
Therapy_poly_vs_mono	Malonic acid	19	19	179.318	-291.022	1.31188	0.200561	0.425631	796.394	0.0546021	0.428698	0.511405
Therapy_poly_vs_mono	L-Threonine	22	19	25.9319	-431.46	2.43859	0.0194944	0.747633	490.816	0.0298154	0.321967	0.511405
Therapy_poly_vs_mono	Hypoxanthine	22	19	354.4	38.6364	0.947602	0.351213	0.281419	726.664	0.0532621	0.541058	0.511405
Therapy_poly_vs_mono	Homogentisic acid	22	19	291.71	-441.645	2.4518	0.02001	0.732825	604.81	0.0944041	0.321967	0.511405
Therapy_poly_vs_mono	Uric acid	22	19	2293.24	-3568.2	2.4484	0.0203457	0.730069	4843.59	0.0923966	0.321967	0.511405
Therapy_poly_vs_mono	N-carbamoyl-L-aspartate	22	19	107.597	-176.141	3.01232	0.00457607	0.923764	206.058	0.0766804	0.321967	0.511405
Therapy_poly_vs_mono	2-Keto-L-gluconate	16	14	139.824	-70.9295	1.28632	0.217678	0.439577	436.889	0.0350908	0.436057	0.511405
Therapy_poly_vs_mono	11,12-DiHETrE	22	19	249.832	-318.924	2.35438	0.0253677	0.700856	469.881	0.0942164	0.321967	0.511405
Therapy_poly_vs_mono	Plasmalogen(p16:0/20:4)	19	19	-325.043	-162.5	-1.80013	0.0822805	-0.58404	-175.809	0.0433194	0.356028	0.511405
Therapy_poly_vs_mono	PI(36:2)	12	15	-120.43	-7.81184	-2.04617	0.0520225	-0.752192	-143.774	0.036679	0.356028	0.511405
Therapy_poly_vs_mono	Gluconolactone	22	18	37.942	-60.4943	2.31148	0.0263599	0.725175	102.494	0.0474901	0.321967	0.511405
Therapy_poly_vs_mono	PI(38:4)	21	19	-369.953	-79.812	-1.29545	0.203103	-0.405426	-413.086	0.104867	0.428773	0.52742
Therapy_poly_vs_mono	PI(40:5)	9	14	40.5298	-44.1861	1.37534	0.1991	0.68776	91.7982	0.102759	0.428698	0.52742
Therapy_poly_vs_mono	Glycerophosphocholine	22	19	2657.71	-1192.54	1.54484	0.130635	0.473351	4523.68	0.11295	0.364548	0.551842
Therapy_poly_vs_mono	Dimethylglycine	22	19	128.407	-929.188	2.41647	0.0238138	0.707355	819.009	0.117582	0.321967	0.558515
Therapy_poly_vs_mono	N-acetyl-glutamate	22	19	1330.38	-1403.13	1.8089	0.078476	0.552324	2796.91	0.124404	0.356028	0.559818
Therapy_poly_vs_mono	Itaconic acid	22	19	79.3583	-88.8835	2.02314	0.0499521	0.62602	158.878	0.12236	0.356028	0.559818
Therapy_poly_vs_mono	L-Serine	22	19	906.902	-914.504	2.22816	0.0317085	0.689221	1458.46	0.134071	0.32233	0.569649
Therapy_poly_vs_mono	Normetanephrine	22	19	-286.906	174.866	-1.83945	0.0735098	-0.566674	-443.794	0.133824	0.356028	0.569649
Therapy_poly_vs_mono	Dephospho-CoA	22	19	-16.3275	33.3045	-1.24967	0.219304	-0.394115	-68.122	0.136583	0.436057	0.569649
Therapy_poly_vs_mono	Malonylcarnitine	22	19	95.1546	-179.308	2.25965	0.0301513	0.683293	222.446	0.143408	0.32233	0.570296
Therapy_poly_vs_mono	Glyceric acid	22	19	20.9334	-34.1514	1.50381	0.140752	0.46886	63.6603	0.142798	0.371253	0.570296
Therapy_poly_vs_mono	L-Proline	22	19	566.844	-2526.13	0.903183	0.373062	0.289341	5323.26	0.159872	0.554728	0.578191
Therapy_poly_vs_mono	Pipecolic acid	22	19	3049.12	-2988.69	1.88961	0.0662786	0.58738	5290.33	0.16821	0.356028	0.578191
Therapy_poly_vs_mono	Methylcysteine	22	19	674.984	-524.271	1.86871	0.0692052	0.580826	1067.74	0.164448	0.356028	0.578191
Therapy_poly_vs_mono	Adenine	22	19	7.85911	-158.217	1.31197	0.19779	0.414899	168.876	0.249375	0.428698	0.578191
Therapy_poly_vs_mono	O-Phosphoethanolamine	21	16	45.1205	-9.50236	1.10104	0.279224	0.368123	70.2017	0.210179	0.487218	0.578191
Therapy_poly_vs_mono	L-Glutamine	22	19	3525.48	-3434.81	1.678	0.101412	0.523221	5853.45	0.235852	0.364548	0.578191
Therapy_poly_vs_mono	7-methylguanine	22	19	123.334	-95.9567	1.5672	0.12515	0.485849	190.073	0.250003	0.364548	0.578191
Therapy_poly_vs_mono	Methionine sulfoxide	22	19	-33.6944	-207.117	1.54868	0.129538	0.479083	161.947	0.217681	0.364548	0.578191
Therapy_poly_vs_mono	N-Acetylornithine	22	19	250.593	-128.601	1.47741	0.147633	0.459861	419.242	0.153399	0.371253	0.578191
Therapy_poly_vs_mono	L-Tyrosine	22	19	61.5815	-1063.38	1.79508	0.0805531	0.550152	963.906	0.188547	0.356028	0.578191
Therapy_poly_vs_mono	Acetyllysine	22	19	73.9799	-352.354	1.91601	0.0640763	0.57551	344.259	0.179428	0.356028	0.578191
Therapy_poly_vs_mono	7-Methylguanosine	22	19	116.438	-21.7432	1.64988	0.107362	0.503153	126.804	0.212583	0.364548	0.578191
Therapy_poly_vs_mono	5-Methylthioadenosine	22	19	-152.192	-236.222	1.56968	0.124739	0.48099	83.5876	0.169432	0.364548	0.578191
Therapy_poly_vs_mono	24,25-Dihydrolanosterol	22	19	163.619	-163.912	0.96531	0.340476	0.295648	535.261	0.187531	0.539087	0.578191
Therapy_poly_vs_mono	Hydroxykynurenine	22	19	-129.013	82.7801	-1.56784	0.125003	-0.486475	-216.161	0.193471	0.364548	0.578191
Therapy_poly_vs_mono	N-acetyl spermine	22	19	535.327	-331.442	1.58572	0.120897	0.489367	735.223	0.248256	0.364548	0.578191
Therapy_poly_vs_mono	Nicotinamide Riboside	14	9	74.4137	-63.0098	1.65591	0.114429	0.688876	142.426	0.188861	0.364548	0.578191
Therapy_poly_vs_mono	Myristoylcarnitine	22	19	-133.484	215.55	-1.93053	0.0621801	-0.617638	-283.874	0.162454	0.356028	0.578191
Therapy_poly_vs_mono	Leucine+isoleucine	22	19	1398.9	-5179.99	1.78585	0.0823101	0.543973	4895.28	0.248569	0.356028	0.578191
Therapy_poly_vs_mono	Tyrosine	22	19	-13.1592	-1327.75	1.75507	0.0872042	0.539024	1115.09	0.202775	0.356028	0.578191
Therapy_poly_vs_mono	Lysine	22	19	3906.74	-3863.32	1.7531	0.0874454	0.543681	6410.69	0.227149	0.356028	0.578191
Therapy_poly_vs_mono	Glycine	22	19	226.363	-182.567	1.37721	0.177054	0.436622	412.087	0.233316	0.407511	0.578191
Therapy_poly_vs_mono	Asparagine	22	19	-275.271	-440.723	0.645339	0.522499	0.200712	387.509	0.18935	0.688098	0.578191
Therapy_poly_vs_mono	Guanidoacetic acid	18	11	25.6584	-35.697	1.99208	0.0567442	0.696436	49.2004	0.19275	0.356028	0.578191
Therapy_poly_vs_mono	Taurine	22	19	726.7	3.44528	0.819677	0.418087	0.261212	1294.06	0.199491	0.595774	0.578191
Therapy_poly_vs_mono	Citraconic acid	22	19	79.8302	-77.1709	1.48028	0.147115	0.464907	175.907	0.162977	0.371253	0.578191
Therapy_poly_vs_mono	Phenylpropiolic acid	22	19	234.296	-220.976	1.6498	0.10755	0.52093	392.421	0.226617	0.364548	0.578191
Therapy_poly_vs_mono	a-ketoglutarate.1	22	19	83.4071	-109.292	1.59316	0.119497	0.500555	165.841	0.250211	0.364548	0.578191
Therapy_poly_vs_mono	Xanthine	22	19	147.309	63.5942	0.590282	0.559884	0.192402	185.126	0.249581	0.703972	0.578191
Therapy_poly_vs_mono	Pseudouridine	22	19	58.9376	-41.0508	1.84723	0.0726666	0.563204	83.9994	0.215487	0.356028	0.578191
Therapy_poly_vs_mono	PI(38:3)	18	17	-152	-39.9842	-1.11507	0.274167	-0.372096	-137.986	0.226807	0.487218	0.578191
Therapy_poly_vs_mono	L-Valine	22	19	128.569	-971.967	1.67154	0.103411	0.506103	833.715	0.275115	0.364548	0.578717
Therapy_poly_vs_mono	N-acetyl-L-alanine	22	19	-1245.85	-1796.49	0.348689	0.729201	0.10832	1953.47	0.277367	0.81428	0.578717
Therapy_poly_vs_mono	Creatine	22	19	-1375.84	-1902.5	0.317568	0.752519	0.0989555	2079.46	0.267941	0.824876	0.578717
Therapy_poly_vs_mono	L-Methionine	22	19	310.526	-1062.95	1.81267	0.0776401	0.557929	947.789	0.280351	0.356028	0.578717
Therapy_poly_vs_mono	Isovalerylcarnitine	22	19	-9.41921	-298.605	0.692888	0.492569	0.216884	520.67	0.266308	0.658042	0.578717
Therapy_poly_vs_mono	Glutamic acid	22	19	373.875	-155.277	1.44612	0.157643	0.434141	496.393	0.256692	0.374402	0.578717
Therapy_poly_vs_mono	Nicotinic acid	22	19	-8.03032	-66.4681	2.02909	0.0502197	0.612363	39.4228	0.260822	0.356028	0.578717
Therapy_poly_vs_mono	Indoleacrylic acid	22	19	-14.8778	-65.4309	0.944847	0.351158	0.299836	67.2928	0.284282	0.541058	0.578717
Therapy_poly_vs_mono	Uridine	22	19	42.2845	-23.4032	1.11942	0.269883	0.349369	77.6004	0.284032	0.487218	0.578717
Therapy_poly_vs_mono	PI(36:1)	9	11	-75.0058	-19.4378	-1.20195	0.245355	-0.537302	-66.7336	0.266322	0.468861	0.578717
Therapy_poly_vs_mono	L-leucine + L-Isoleucine	22	19	1295.35	-4781.78	1.68756	0.099872	0.514302	4412.41	0.287725	0.364548	0.578835
Therapy_poly_vs_mono	L-Lysine	22	19	3514.68	-3385.23	1.52304	0.135977	0.476642	5637.6	0.294732	0.36908	0.586037
Therapy_poly_vs_mono	L-Histidine	22	19	-431.333	214.427	-1.18059	0.245037	-0.369191	-642.706	0.301888	0.468861	0.593367
Therapy_poly_vs_mono	L-Tryptophan	22	19	-421.411	-2046.1	1.36488	0.180206	0.419369	1362.52	0.306134	0.407511	0.594874
Therapy_poly_vs_mono	Methionine	22	19	198.192	-799.971	1.73381	0.0908629	0.535508	661.48	0.317585	0.361339	0.610191
Therapy_poly_vs_mono	Hexanoylcarnitine	22	19	192.32	5.49901	0.48887	0.627882	0.154594	438.219	0.331965	0.74561	0.630733
Therapy_poly_vs_mono	Guanidinoacetic acid	22	19	78.7523	-4157.93	1.58456	0.121501	0.483295	2927.29	0.340075	0.364548	0.637982
Therapy_poly_vs_mono	Tryptophan	22	19	-146.876	-444.965	1.28576	0.206127	0.396793	246.753	0.343242	0.429851	0.637982
Therapy_poly_vs_mono	Acetylcholine	22	19	549.583	-338.623	2.23343	0.0320445	0.674728	428.597	0.354922	0.32233	0.647749
Therapy_poly_vs_mono	a-ketoglutarate	22	19	146.872	-62.6215	1.10877	0.274707	0.34961	203.535	0.356072	0.487218	0.647749
Therapy_poly_vs_mono	Pyroglutamic acid	22	17	25.2129	-9.3016	0.858753	0.396705	0.280713	41.3877	0.376968	0.573233	0.678542
Therapy_poly_vs_mono	Indole-3-carboxylic acid	22	19	88.4381	-76.9231	1.37538	0.176934	0.422983	125.077	0.391896	0.407511	0.698066
Therapy_poly_vs_mono	Cystine	22	19	262.669	-269.825	1.02772	0.310435	0.319738	488.563	0.421281	0.510635	0.74267
Therapy_poly_vs_mono	Creatinine	22	19	420.36	-322.132	1.37106	0.181116	0.406671	502.896	0.44267	0.407511	0.752435
Therapy_poly_vs_mono	Anandamide	22	19	104.415	-42.2273	1.46238	0.152019	0.445889	91.7757	0.450942	0.37136	0.752435
Therapy_poly_vs_mono	Histidine	22	19	-8.28839	-44.542	0.223232	0.824635	0.0707932	-132.6	0.457621	0.859833	0.752435
Therapy_poly_vs_mono	Aspartic acid	22	19	219.771	-180.163	1.1013	0.278644	0.351846	307.707	0.452082	0.487218	0.752435
Therapy_poly_vs_mono	Pyruvic acid	22	19	-38.6364	-256.325	1.25366	0.21744	0.389301	132.827	0.457621	0.436057	0.752435
Therapy_poly_vs_mono	2-Hydroxyglutarate	22	19	91.1135	-40.1348	1.44396	0.156785	0.444646	84.2508	0.441592	0.374402	0.752435
Therapy_poly_vs_mono	Ascorbic acid	22	19	147.107	-155.541	1.11361	0.272278	0.346064	244.807	0.449605	0.487218	0.752435
Therapy_poly_vs_mono	Sarcosine	22	19	382.164	-1500.51	1.16909	0.249511	0.359935	1390.11	0.463401	0.468861	0.754646
Therapy_poly_vs_mono	Vitamin K2	16	13	-54.6897	113.552	-1.66708	0.115777	-0.671763	-80.7289	0.467792	0.364548	0.754646
Therapy_poly_vs_mono	Purine	22	19	-97.5122	-75.2364	-0.248809	0.805089	-0.0798056	-72.329	0.482538	0.849817	0.757061
Therapy_poly_vs_mono	DL-2-Aminooctanoic acid	22	19	71.526	-44.4974	0.407888	0.685714	0.128603	220.125	0.481074	0.797667	0.757061
Therapy_poly_vs_mono	glucose-1-phosphate	22	19	45.3903	22.1989	0.158656	0.874788	0.0498328	119.962	0.482571	0.901137	0.757061
Therapy_poly_vs_mono	Oxaloacetic acid	22	19	118.707	-93.2848	1.17346	0.247982	0.358474	147.928	0.488639	0.468861	0.759612
Therapy_poly_vs_mono	Eicosapentaenoic acid	22	18	6.09501	-60.3158	0.592911	0.556865	0.181374	90.3026	0.51524	0.703972	0.793749
Therapy_poly_vs_mono	Alanine	22	19	320.516	-1392.38	1.06122	0.295144	0.327122	1205.34	0.523902	0.509794	0.799886
Therapy_poly_vs_mono	Suberylcarnitine	21	18	-93.038	322.699	-0.969569	0.34581	-0.337042	-286.586	0.538019	0.541058	0.807028
Therapy_poly_vs_mono	Azelaic acid	20	18	-179.265	1685.28	-1.03444	0.313548	-0.351833	-1222.57	0.537127	0.510635	0.807028
Therapy_poly_vs_mono	L-Glutamic acid	22	19	405.476	-397.216	1.30517	0.199575	0.407556	443.251	0.544003	0.428698	0.80891
Therapy_poly_vs_mono	1-Methylhistidine	22	19	12.1049	-31.8946	0.18872	0.851379	0.0597837	153.169	0.562804	0.882339	0.809072
Therapy_poly_vs_mono	Tiglylcarnitine	22	19	254.557	-198.954	1.03977	0.30503	0.326063	286.241	0.566462	0.510635	0.809072
Therapy_poly_vs_mono	Ketoleucine	22	19	53.1889	-49.065	1.02197	0.313441	0.31116	70.5757	0.56087	0.510635	0.809072
[truncated: 53 more rows]

## Sheet: Correlation_Network_Edges
m1	m2	rho_sc	p_sc	rho_ct	p_ct	fdr_sc	fdr_ct	diff_p	diff_z	diff_fdr	delta_rho	edge_category
Allantoin	PI(38:5)	0.790433	0.0195445	-0.364936	0.113629	0.0431984	0.197726	2.96797e-10	6.30044	4.31187e-06	1.15537	SCZ-only
Creatine	Asparagine	0.827248	2.60627e-11	0.986116	3.05232e-31	5.31051e-10	3.16897e-28	1.71604e-08	-5.63843	0.000124653	-0.158868	shared
N-acetyl-L-alanine	Asparagine	0.827256	2.60424e-11	0.984053	4.17323e-30	5.31051e-10	3.79111e-27	9.49891e-08	-5.33606	0.00046	-0.156797	shared
5-Hydroxyindoleacetic acid	Allantoin	-0.348786	0.185499	0.627031	0.00234916	0.283859	0.00691196	1.88686e-06	-4.76518	0.00685308	-0.975817	Control-only
L-leucine + L-Isoleucine	Leucine+isoleucine	0.963541	6.14494e-24	0.995778	4.98295e-41	6.3767e-21	2.41854e-37	2.56875e-06	-4.7026	0.00746376	-0.0322377	shared
Linoleylcarnitine	PI(36:2)	0.880289	1.44734e-06	0.398531	0.0291559	8.89087e-06	0.0632415	3.54113e-05	4.13555	0.0857425	0.481758	SCZ-only
3-Hydroxyisovaleryl carnitine	Allantoin	0.238586	0.37353	0.82846	3.51424e-06	0.489592	1.98136e-05	4.70805e-05	-4.06967	0.0977123	-0.589874	Control-only
N-acetyl-L-alanine	Allantoin	-0.0456218	0.866764	0.695257	0.000467543	0.906511	0.00159045	9.12145e-05	-3.91285	0.147241	-0.740879	Control-only
Betaine	Asparagine	0.351405	0.0282632	0.855668	3.92713e-12	0.0595854	7.895e-11	8.16117e-05	-3.93962	0.147241	-0.504263	Control-only
Creatine	Allantoin	0.017673	0.948204	0.712151	0.000292864	0.965355	0.00104692	0.000154584	-3.78359	0.204163	-0.694478	Control-only
L-Phenylalanine	Asparagine	0.169738	0.288705	0.779962	2.98986e-09	0.401139	3.22147e-08	0.000154542	-3.78365	0.204163	-0.610223	Control-only
Linoleylcarnitine	PI(38:5)	0.785294	0.000312854	0.206697	0.273119	0.00106744	0.392581	0.000235697	3.67732	0.214904	0.578597	SCZ-only
Arginine	Asparagine	0.246776	0.119842	0.800938	5.43207e-10	0.200057	6.86567e-09	0.000235975	-3.67702	0.214904	-0.554162	Control-only
Glutamic acid	Allantoin	0.142752	0.597913	0.755686	7.44437e-05	0.696647	0.000302414	0.000265175	-3.64714	0.214904	-0.612934	Control-only
L-Methionine	Asparagine	0.371324	0.0168363	0.841691	1.02193e-11	0.0379928	1.87548e-10	0.000290158	-3.62393	0.214904	-0.470366	Control-only
Histamine	Nicotinamide Riboside	0.7	0.000847586	0.0206612	0.935145	0.00263001	0.961496	0.000246646	3.66572	0.214904	0.679339	SCZ-only
7-Methylguanosine	Tyrosine	0.847809	2.67711e-12	0.39058	0.0127106	7.53743e-11	0.0311129	0.000295849	3.61891	0.214904	0.457229	SCZ-only
Asparagine	Allantoin	0.0338484	0.900963	0.702404	0.000385065	0.930968	0.00134026	0.000284459	-3.62906	0.214904	-0.668556	Control-only
Nicotinamide Riboside	Oxaloacetic acid	0.754633	3.17405e-05	0.170835	0.45906	0.00013965	0.57822	0.000444965	3.51187	0.220449	0.583798	SCZ-only
Zymosterol	Linoleylcarnitine	-0.0662338	0.775454	0.636697	0.000155109	0.840354	0.000587726	0.000391484	-3.54576	0.220449	-0.702931	Control-only
L-Carnitine	Asparagine	0.258691	0.102439	0.789624	1.39581e-09	0.176876	1.61916e-08	0.00048557	-3.48859	0.220449	-0.530933	Control-only
L-Carnitine	Allantoin	0.322533	0.223082	0.82093	5.12301e-06	0.328796	2.77743e-05	0.000353106	-3.57286	0.220449	-0.498396	Control-only
7-methylguanine	7-Methylguanosine	0.837979	8.26572e-12	0.384688	0.0142472	1.98815e-10	0.034405	0.000461972	3.50189	0.220449	0.453292	SCZ-only
L-Glutamine	Asparagine	0.323299	0.0392231	0.81912	1.0434e-10	0.0791765	1.53968e-09	0.000392258	-3.54524	0.220449	-0.495821	Control-only
L-Valine	L-leucine + L-Isoleucine	0.944031	2.19833e-20	0.989071	3.321e-33	1.18286e-17	5.25278e-30	0.000336294	-3.58561	0.220449	-0.0450401	shared
Urea	Allantoin	0.215022	0.423861	0.77258	4.0501e-05	0.537898	0.000175621	0.000465995	-3.49958	0.220449	-0.557558	Control-only
5-Hydroxyindoleacetic acid	Ascorbic acid	0.0831083	0.605442	0.71714	1.92756e-07	0.703106	1.46075e-06	0.000394703	-3.5436	0.220449	-0.634032	Control-only
L-Kynurenine	Tyrosine	0.661033	2.54734e-06	0.922839	2.49856e-17	1.47031e-05	2.45382e-15	0.000430122	-3.52088	0.220449	-0.261806	shared
L-Serine	7-Methylguanosine	0.79547	5.16735e-10	0.272987	0.0883218	7.50713e-09	0.16063	0.000482918	3.49006	0.220449	0.522483	SCZ-only
N-acetyl-L-alanine	Creatine	0.990547	2.89311e-35	0.998124	1.0327e-47	1.05078e-31	1.50103e-43	0.00044963	-3.5091	0.220449	-0.0075771	shared
Creatine	Arginine	0.364904	0.0189865	0.827017	4.80805e-11	0.042138	7.69659e-10	0.000567118	-3.44687	0.228864	-0.462113	Control-only
L-Glutamic acid	Asparagine	0.115802	0.470913	0.723392	1.34008e-07	0.582745	1.0489e-06	0.000546487	-3.45687	0.228864	-0.60759	Control-only
Allantoin	2-Keto-L-gluconate	0.743449	0.00358275	0.159844	0.488865	0.00966038	0.605923	0.000559638	3.45046	0.228864	0.583605	SCZ-only
Urea	L-Kynurenine	0.695967	4.37507e-07	0.928705	5.85763e-18	3.02672e-06	7.46848e-16	0.000630495	-3.41815	0.247563	-0.232739	shared
L-Lysine	Asparagine	0.354884	0.0228005	0.819815	9.76084e-11	0.0494249	1.45363e-09	0.000674208	-3.39986	0.25776	-0.464931	Control-only
Serotonin	L-Kynurenine	0.614225	1.94107e-05	0.904315	1.26339e-15	9.00954e-05	6.67759e-14	0.000735393	-3.37603	0.26058	-0.29009	shared
N-acetyl-L-alanine	Arginine	0.373296	0.0162188	0.824953	5.90903e-11	0.0367994	9.26513e-10	0.000733654	-3.37668	0.26058	-0.451658	Control-only
Propionylcarnitine	Allantoin	0.311994	0.239436	0.802469	1.20468e-05	0.347686	5.90559e-05	0.00070114	-3.38913	0.26058	-0.490475	Control-only
Guanidoacetic acid	Mevalonic acid	0.421839	0.0568138	0.84058	6.6133e-06	0.108348	3.48655e-05	0.000814449	-3.34784	0.261475	-0.41874	Control-only
7-Methylguanosine	3-Hydroxydodecanoylcarnitine	0.781419	7.04163e-09	0.271427	0.0902296	7.57784e-08	0.163547	0.000848381	3.33651	0.261475	0.509993	SCZ-only
L-Phenylalanine	Nicotinamide Riboside	0.688411	0.000281779	0.0753491	0.745475	0.00097214	0.822115	0.000863903	3.33146	0.261475	0.613062	SCZ-only
Guanidinoacetic acid	Nicotinamide Riboside	0.798419	4.96952e-06	0.312216	0.168241	2.68291e-05	0.269613	0.000840023	3.33926	0.261475	0.486203	SCZ-only
3-Aminoisobutyric acid	Allantoin	-0.0868286	0.749161	0.597141	0.00426198	0.819194	0.0117503	0.000782948	-3.35875	0.261475	-0.68397	Control-only
Methionine	Asparagine	0.355176	0.0226808	0.81608	1.39219e-10	0.0492169	1.99168e-09	0.000809465	-3.34954	0.261475	-0.460904	Control-only
Pyruvic acid	Taurine	0.1744	0.275469	0.739139	5.12851e-08	0.38709	4.34906e-07	0.000825223	-3.34419	0.261475	-0.564739	Control-only
Asparagine	Oxaloacetic acid	0.329644	0.0353168	0.803396	4.38987e-10	0.0722958	5.67171e-09	0.000915654	-3.31524	0.264906	-0.473752	Control-only
L-Tyrosine	7-Methylguanosine	0.822023	4.43296e-11	0.377369	0.016372	8.45171e-10	0.0387758	0.000910758	3.31674	0.264906	0.444654	SCZ-only
5-Hydroxyindoleacetic acid	Mevalonic acid	0.139121	0.480163	0.718587	1.65559e-05	0.59111	7.86917e-05	0.000929942	-3.31091	0.264906	-0.579467	Control-only
5-Hydroxyindoleacetic acid	Aspartic acid	0.170638	0.286118	0.733055	7.49186e-08	0.398733	6.19069e-07	0.000954906	-3.30349	0.266786	-0.562417	Control-only
L-Valine	Nicotinamide Riboside	0.786561	8.56023e-06	0.303995	0.180329	4.33019e-05	0.284489	0.0011931	3.24053	0.2743	0.482566	SCZ-only
Saccharopine	Suberic Acid	-0.541915	0.000772655	0.144113	0.416136	0.00241817	0.53827	0.00113032	-3.2559	0.2743	-0.686028	SCZ-only
Orotic acid	PI(36:1)	-0.549123	0.01489	0.12945	0.451774	0.0340611	0.571549	0.00121372	-3.23564	0.2743	-0.678572	SCZ-only
L-Glutamic acid	5-Hydroxyindoleacetic acid	0.297918	0.0585149	0.783282	2.31135e-09	0.111125	2.53742e-08	0.00122725	-3.23247	0.2743	-0.485364	Control-only
Agmatine	Pantothenic acid	0.381142	0.0261488	0.819847	1.67223e-07	0.0557923	1.28603e-06	0.00108016	-3.26877	0.2743	-0.438706	Control-only
DL-2-Aminooctanoic acid	5-Hydroxyindoleacetic acid	0.273979	0.0830233	0.774275	4.59952e-09	0.148613	4.78554e-08	0.00116937	-3.24625	0.2743	-0.500297	Control-only
5-Hydroxyindoleacetic acid	Myristoylcarnitine	-0.193971	0.224292	-0.741392	4.44495e-08	0.33021	3.81841e-07	0.00104522	3.27806	0.2743	0.547421	Control-only
7-Methylguanosine	Glycine	0.80331	2.60145e-10	0.33754	0.0331673	4.09025e-09	0.0704703	0.00105394	3.27572	0.2743	0.46577	SCZ-only
Purine	Nicotinamide Riboside	0.519763	0.0110211	-0.172134	0.4556	0.0261838	0.575389	0.00116716	3.24679	0.2743	0.691897	SCZ-only
Sarcosine	5-Hydroxyindoleacetic acid	0.193318	0.225887	0.736326	6.11845e-08	0.33202	5.12574e-07	0.00122629	-3.23269	0.2743	-0.543008	Control-only
Propionylcarnitine	Asparagine	0.311433	0.0474712	0.790994	1.2489e-09	0.0932732	1.46276e-08	0.00113091	-3.25576	0.2743	-0.479562	Control-only
Betaine	Creatine	0.456625	0.00347807	0.847571	1.00309e-11	0.00940606	1.8479e-10	0.001089	-3.26646	0.2743	-0.390946	Control-only
Betaine	N-acetyl-L-alanine	0.460067	0.00321037	0.85	7.61499e-12	0.00874457	1.4412e-10	0.00101902	-3.28522	0.2743	-0.389933	Control-only
N-acetyl-glutamate	7-Methylguanosine	0.794599	5.56661e-10	0.327141	0.0393513	7.99918e-09	0.0814309	0.00127283	3.22204	0.275995	0.467458	SCZ-only
PI(36:1)	PI(38:3)	0.897762	1.85595e-07	0.616905	6.1483e-05	1.40069e-06	0.000255184	0.00134367	3.20649	0.287071	0.280857	shared
L-Glutamine	7-Methylguanosine	0.841674	5.45912e-12	0.452196	0.00339605	1.4087e-10	0.00961377	0.00136692	3.20155	0.287806	0.389479	SCZ-only
Lysine	Asparagine	0.378948	0.0145532	0.813453	1.77857e-10	0.0333537	2.49533e-09	0.00138991	-3.19674	0.288466	-0.434505	Control-only
Serotonin	5-Hydroxyindoleacetic acid	0.1603	0.316745	0.712041	2.57472e-07	0.43122	1.91425e-06	0.00158282	-3.15905	0.293052	-0.551741	Control-only
Citrulline	L-Kynurenine	0.634463	8.40695e-06	0.9022	1.87824e-15	4.26602e-05	9.30952e-14	0.00145928	-3.18266	0.293052	-0.267737	shared
1-Methylnicotinamide	Allantoin	0.0868286	0.749161	0.676098	0.000766685	0.819194	0.00249413	0.00146423	-3.18168	0.293052	-0.589269	Control-only
L-Palmitoylcarnitine	Oleoylcarnitine	0.895073	9.94887e-08	0.614454	6.70126e-05	8.01204e-07	0.000275305	0.00155453	3.16431	0.293052	0.280619	shared
Sarcosine	Asparagine	0.404025	0.0087992	0.820395	9.23074e-11	0.0214957	1.3803e-09	0.00158384	-3.15887	0.293052	-0.41637	Control-only
5-Hydroxyindoleacetic acid	N-acetyl spermine	0.180416	0.258984	0.721925	1.4607e-07	0.369804	1.13536e-06	0.00159169	-3.15742	0.293052	-0.541509	Control-only
Cholesterol	L-Palmitoylcarnitine	0.887218	1.84968e-07	0.590906	0.000117822	1.39741e-06	0.000459497	0.0015822	3.15917	0.293052	0.296312	shared
Creatine	L-Methionine	0.503855	0.000783691	0.855575	2.0293e-12	0.00244744	4.28097e-11	0.00176807	-3.12666	0.298681	-0.351719	shared
7-methylguanine	5-Hydroxyindoleacetic acid	0.173099	0.279123	0.715861	2.07403e-07	0.391004	1.56521e-06	0.00171394	-3.13579	0.298681	-0.542762	Control-only
Nicotinamide Riboside	Riboflavin	-0.699605	0.000202889	-0.141604	0.540355	0.000723863	0.652991	0.00172103	-3.13458	0.298681	-0.558	SCZ-only
L-Proline	Methionine	0.755325	1.14895e-08	0.936723	6.51653e-19	1.16808e-07	1.2975e-16	0.00168548	-3.14069	0.298681	-0.181398	shared
Pyruvic acid	Inosine	-0.0148821	0.929337	0.608998	8.09669e-05	0.951456	0.000326179	0.0017661	-3.12698	0.298681	-0.62388	Control-only
7-Methylguanosine	Indole-3-carboxylic acid	0.677352	1.15202e-06	0.102712	0.528249	7.20471e-06	0.642358	0.00179442	3.1223	0.299648	0.57464	SCZ-only
Tiglylcarnitine	7-Methylguanosine	0.832092	1.56757e-11	0.445138	0.00399978	3.47159e-10	0.011116	0.00192671	3.1013	0.318083	0.386954	SCZ-only
7-Methylguanosine	Lysine	0.827163	2.6294e-11	0.434677	0.0050661	5.35013e-10	0.0137201	0.00200836	3.08899	0.327836	0.392486	SCZ-only
L-Glutamine	5-Hydroxyindoleacetic acid	0.170231	0.287286	0.708589	3.12117e-07	0.399647	2.28085e-06	0.0020377	-3.08468	0.32893	-0.538358	Control-only
L-Valine	Leucine+isoleucine	0.956351	1.92611e-22	0.989257	2.39801e-33	1.47276e-19	4.35689e-30	0.00213224	-3.07117	0.32965	-0.0329061	shared
7-Methylguanosine	3-methylphenylacetic acid	0.793449	6.13823e-10	0.353746	0.0293476	8.71712e-09	0.0635814	0.00208219	3.07825	0.32965	0.439703	SCZ-only
Allantoin	Hexose Disaccharide Pool	0.104895	0.745609	0.671865	0.000851168	0.816195	0.00273393	0.0021467	-3.06915	0.32965	-0.56697	Control-only
Threonine	Asparagine	0.421121	0.00610839	0.820621	9.0314e-11	0.0155826	1.35471e-09	0.00212165	-3.07265	0.32965	-0.3995	Control-only
7-Methylguanosine	Mevalonic acid	0.525394	0.00409128	-0.124162	0.529028	0.0108801	0.642821	0.00215561	3.06791	0.32965	0.649555	SCZ-only
L-Lysine	7-Methylguanosine	0.82913	2.14314e-11	0.447056	0.00382708	4.51239e-10	0.0106912	0.00229165	3.04958	0.339514	0.382074	SCZ-only
5-Hydroxyindoleacetic acid	L-Kynurenine	0.255162	0.10738	0.74647	3.20284e-08	0.183251	2.84208e-07	0.00230233	-3.04818	0.339514	-0.491309	Control-only
Alanine	5-Hydroxyindoleacetic acid	0.256294	0.105775	0.747502	2.99367e-08	0.181093	2.67278e-07	0.00226535	-3.05304	0.339514	-0.491208	Control-only
Creatine	Methylcysteine	0.504618	0.000767108	0.85083	3.59083e-12	0.00240443	7.28948e-11	0.00231359	-3.04671	0.339514	-0.346213	shared
5-Hydroxyindoleacetic acid	Tiglylcarnitine	0.201594	0.206252	0.719017	1.73008e-07	0.308911	1.32421e-06	0.00239684	-3.03607	0.339868	-0.517423	Control-only
Pipecolic acid	Asparagine	0.376928	0.0151311	0.799643	6.06979e-10	0.0345093	7.61211e-09	0.00239903	-3.03579	0.339868	-0.422716	Control-only
Oleoylcarnitine	PI(36:2)	0.886691	3.91422e-08	0.607789	6.61375e-05	3.4611e-07	0.000272171	0.00241023	3.03439	0.339868	0.278903	shared
5-Hydroxyindoleacetic acid	Aspartylglycosamine	-0.021968	0.894397	0.590347	9.56532e-05	0.926276	0.00038018	0.00243297	-3.03156	0.339868	-0.612315	Control-only
N-acetyl-L-alanine	5-Hydroxyindoleacetic acid	0.0481791	0.764841	0.635489	1.05454e-05	0.831978	5.26182e-05	0.00235783	-3.04101	0.339868	-0.58731	Control-only
PI(36:1)	PI(38:4)	0.893233	1.15538e-07	0.62817	4.09955e-05	9.1523e-07	0.000177606	0.00246321	3.02782	0.340815	0.265063	shared
Creatine	L-Glutamine	0.468636	0.00199912	0.835632	1.9727e-11	0.00571124	3.41754e-10	0.00250271	-3.02301	0.343013	-0.366996	Control-only
L-Kynurenine	Allantoin	0.111847	0.68005	0.669266	0.000906867	0.765221	0.00289318	0.00254245	-3.01824	0.343115	-0.557419	Control-only
Creatine	Methionine	0.478827	0.00154011	0.83897	1.37764e-11	0.00450285	2.45693e-10	0.00257431	-3.01447	0.343115	-0.360143	Control-only
L-Lysine	5-Hydroxyindoleacetic acid	0.204643	0.199328	0.718427	1.78998e-07	0.30071	1.36217e-06	0.00255272	-3.01702	0.343115	-0.513784	Control-only
Linoleylcarnitine	Malonic acid	-0.347368	0.133449	-0.78426	2.1261e-06	0.217911	1.27225e-05	0.00266117	3.00439	0.351468	0.436892	Control-only
N-acetyl-L-alanine	Methylcysteine	0.51065	0.000646499	0.849892	4.01045e-12	0.00205933	8.05136e-11	0.00272782	-2.99685	0.35405	-0.339242	shared
7-Methylguanosine	N-acetyl spermine	0.809408	1.49299e-10	0.4085	0.00887249	2.49599e-09	0.022609	0.00275334	2.99401	0.35405	0.400907	SCZ-only
Alanine	Asparagine	0.382487	0.013586	0.798499	6.69112e-10	0.0314145	8.263e-09	0.00275383	-2.99396	0.35405	-0.416012	Control-only
Phosphorylcholine	L-Palmitoylcarnitine	0.829709	1.79578e-06	0.460672	0.00411426	1.07628e-05	0.0113971	0.00285105	2.98336	0.360175	0.369037	SCZ-only
5-Hydroxyindoleacetic acid	Lysine	0.216501	0.173956	0.720893	1.55148e-07	0.26991	1.20038e-06	0.00283168	-2.98544	0.360175	-0.504392	Control-only
Histamine	5-Hydroxyindoleacetic acid	-0.0999175	0.586376	0.52803	0.00226494	0.686507	0.00668851	0.00290708	-2.9774	0.364086	-0.627947	Control-only
Adenine	7-Methylguanosine	0.798257	4.06255e-10	0.386171	0.0138464	6.07209e-09	0.0335709	0.00295517	2.97236	0.366946	0.412087	SCZ-only
Methylcysteine	Asparagine	0.424153	0.00571448	0.813679	1.74178e-10	0.0146981	2.45318e-09	0.00301507	-2.9662	0.371212	-0.389526	Control-only
Dimethylglycine	Nicotinamide Riboside	0.790514	7.16838e-06	0.37025	0.0985086	3.71009e-05	0.176008	0.00305726	2.96192	0.373243	0.420264	SCZ-only
BMP(18:1/16:0)	Linoleylcarnitine	0.778571	0.00062735	0.343958	0.108043	0.00200487	0.189741	0.00309747	2.9579	0.37348	0.434613	SCZ-only
3-Hydroxyhexanoylcarnitine	Cytidine monophosphate	0.0285769	0.868594	-0.573189	0.00143098	0.907642	0.00440383	0.0031996	2.94788	0.381015	0.601766	Control-only
5-Methylthioadenosine	Mevalonic acid	0.813938	1.37958e-07	0.429236	0.022645	1.06666e-06	0.0511253	0.00325461	2.94261	0.384414	0.384701	SCZ-only
Histamine	Propionylcarnitine	0.381668	0.0311236	0.792822	1.05477e-07	0.0648356	8.43294e-07	0.00337745	-2.93112	0.395707	-0.411154	Control-only
L-Palmitoylcarnitine	Linoleylcarnitine	0.892157	1.48935e-06	0.639448	0.000142239	9.10278e-06	0.000544494	0.00346388	2.92326	0.396246	0.252709	shared
Creatine	5-Hydroxyindoleacetic acid	0.0795469	0.621037	0.638585	9.25546e-06	0.716768	4.71037e-05	0.00342039	-2.92719	0.396246	-0.559038	Control-only
5-Hydroxyindoleacetic acid	Asparagine	0.118154	0.461886	0.660913	3.45534e-06	0.57424	1.95422e-05	0.00343672	-2.92571	0.396246	-0.542758	Control-only
L-Proline	Tyrosine	0.759387	8.62915e-09	0.931376	2.90378e-18	9.05158e-08	4.44278e-16	0.00352465	-2.91784	0.397577	-0.171989	shared
L-Tyrosine	L-Kynurenine	0.719488	1.15493e-07	0.91866	6.55788e-17	9.1523e-07	5.54179e-15	0.00353025	-2.91735	0.397577	-0.199173	shared
5-Methylthioadenosine	Allantoin	0.328183	0.214616	0.767382	4.91033e-05	0.318744	0.000208567	0.00356246	-2.91451	0.398119	-0.439199	Control-only
O-Phosphoethanolamine	7-Methylguanosine	0.631342	2.79082e-05	0.0712985	0.684003	0.000124908	0.773334	0.00360783	2.91056	0.400111	0.560043	SCZ-only
N-acetyl-L-alanine	L-Methionine	0.521258	0.000474866	0.84807	4.96023e-12	0.0015573	9.74283e-11	0.00366078	-2.906	0.402908	-0.326812	shared
Asparagine	Guanidoacetic acid	0.32688	0.0834906	0.765743	1.29571e-06	0.149323	8.26743e-06	0.00368877	-2.90362	0.402936	-0.438862	Control-only
N-acetyl-L-alanine	L-Glutamine	0.476108	0.00165243	0.82944	3.76117e-11	0.00480129	6.13565e-10	0.00380368	-2.894	0.406323	-0.353332	Control-only
Vitamin K2	2-Keto-L-gluconate	-0.541965	0.0135707	0.0618671	0.745353	0.0313841	0.822043	0.00377862	-2.89608	0.406323	-0.603832	SCZ-only
Creatine	L-Phenylalanine	0.314006	0.0455731	0.759229	1.35759e-08	0.089994	1.30248e-07	0.0037511	-2.89837	0.406323	-0.445223	Control-only
L-Kynurenine	Asparagine	0.436245	0.00435384	0.81257	1.92945e-10	0.0115151	2.68626e-09	0.00387962	-2.88779	0.41141	-0.376326	Control-only
Histamine	L-Carnitine	0.406745	0.0208739	0.799274	6.97193e-08	0.045777	5.77419e-07	0.00399167	-2.87882	0.417202	-0.392529	Control-only
L-Kynurenine	Arginine	0.517141	0.00053592	0.844841	7.1807e-12	0.00173404	1.36612e-10	0.00396302	-2.88109	0.417202	-0.3277	shared
L-Tyrosine	Asparagine	0.496144	0.000970331	0.836101	1.87654e-11	0.00295596	3.27438e-10	0.00404669	-2.8745	0.419931	-0.339957	Control-only
Citrulline	5-Hydroxyindoleacetic acid	0.157432	0.325594	0.675579	1.72817e-06	0.440965	1.06032e-05	0.00414267	-2.86709	0.420868	-0.518148	Control-only
Asparagine	Orotic acid	0.404316	0.00966578	0.797223	7.45369e-10	0.0233186	9.12716e-09	0.00414474	-2.86693	0.420868	-0.392907	Control-only
Adenine	Tyrosine	0.878142	4.66451e-14	0.966038	6.17334e-24	2.36944e-12	3.45113e-21	0.0041716	-2.86489	0.420868	-0.0878958	shared
Creatine	L-Lysine	0.48789	0.001213	0.832481	2.74846e-11	0.00360968	4.62907e-10	0.00410355	-2.87009	0.420868	-0.344591	Control-only
L-Proline	L-Methionine	0.760955	7.71463e-09	0.930062	4.11492e-18	8.2229e-08	5.751e-16	0.00424653	-2.85924	0.423897	-0.169108	shared
7-Methylguanosine	Orotic acid	0.781051	2.74913e-09	0.369564	0.0189263	3.29261e-08	0.0438762	0.00425998	2.85824	0.423897	0.411486	SCZ-only
Tyrosine	Asparagine	0.454233	0.00285216	0.816267	1.36784e-10	0.00786714	1.95878e-09	0.00453717	-2.83818	0.424128	-0.362035	Control-only
L-Serine	Asparagine	0.309301	0.0490917	0.749507	2.62305e-08	0.0959639	2.37397e-07	0.00475404	-2.82324	0.424128	-0.440207	Control-only
L-Serine	PI(36:1)	-0.571429	0.00848909	0.00283231	0.98692	0.0208046	0.992863	0.00472742	-2.82504	0.424128	-0.574261	SCZ-only
L-Palmitoylcarnitine	PI(36:2)	0.867996	7.08881e-07	0.588619	0.000127099	4.65159e-06	0.000491716	0.00493131	2.81149	0.424128	0.279377	shared
L-Glutamine	Glycerophosphocholine	0.831744	1.62683e-11	0.950697	6.43076e-21	3.57574e-10	1.86942e-18	0.00521277	-2.79358	0.424128	-0.118953	shared
Homoarginine	Allantoin	0.192789	0.474389	0.68616	0.000593966	0.585986	0.00197377	0.00519722	-2.79455	0.424128	-0.493371	Control-only
Guanidinoacetic acid	Asparagine	0.499107	0.000894402	0.834264	2.28018e-11	0.00275937	3.88084e-10	0.00463809	-2.83115	0.424128	-0.335157	Control-only
5-Hydroxyindoleacetic acid	Tyrosine	0.13099	0.414311	0.656347	4.25456e-06	0.528363	2.35133e-05	0.00459201	-2.83434	0.424128	-0.525357	Control-only
Histamine	Asparagine	0.346686	0.0519082	0.764392	5.57947e-07	0.100523	3.85812e-06	0.00522569	-2.79278	0.424128	-0.417705	Control-only
Nicotinamide Riboside	Leucine+isoleucine	0.752964	3.38076e-05	0.320234	0.157002	0.000147761	0.255259	0.00503075	2.80506	0.424128	0.432731	SCZ-only
Serotonin	Asparagine	0.415091	0.00696236	0.798124	6.90746e-10	0.0175332	8.49407e-09	0.00477865	-2.82159	0.424128	-0.383033	Control-only
Acetyllysine	Nicotinamide Riboside	0.806324	3.38947e-06	0.42885	0.0524014	1.90861e-05	0.10393	0.00438938	2.84873	0.424128	0.377474	SCZ-only
Acetyllysine	Allantoin	0.354673	0.177683	0.768681	4.68164e-05	0.274293	0.000199788	0.00513584	-2.79839	0.424128	-0.414008	Control-only
L-Tyrosine	5-Hydroxyindoleacetic acid	0.209531	0.188572	0.700943	4.73498e-07	0.287862	3.31677e-06	0.00447825	-2.84235	0.424128	-0.491412	Control-only
Pipecolic acid	5-Hydroxyindoleacetic acid	0.225291	0.156707	0.710405	2.82156e-07	0.248027	2.07653e-06	0.00433983	-2.85234	0.424128	-0.485115	Control-only
5-Hydroxyindoleacetic acid	Glycerophosphocholine	0.290356	0.0655352	0.741533	4.40521e-08	0.122346	3.78875e-07	0.0045734	-2.83564	0.424128	-0.451177	Control-only
5-Hydroxyindoleacetic acid	3-Hydroxyisovaleryl carnitine	0.108425	0.499815	0.641024	8.34282e-06	0.609784	4.3001e-05	0.00481865	-2.81891	0.424128	-0.5326	Control-only
5-Hydroxyindoleacetic acid	11,12-DiHETrE	0.27877	0.0775685	0.732902	7.56273e-08	0.140408	6.23861e-07	0.00497948	-2.80836	0.424128	-0.454132	Control-only
5-Hydroxyindoleacetic acid	Orotic acid	0.143634	0.37658	0.661882	3.30455e-06	0.492967	1.87551e-05	0.00478866	-2.82092	0.424128	-0.518247	Control-only
5-Hydroxyindoleacetic acid	Glutamic acid	0.0197334	0.902535	0.591078	5.92243e-05	0.932175	0.000246725	0.00429243	-2.85583	0.424128	-0.571344	Control-only
Pipecolic acid	7-Methylguanosine	0.835402	1.09718e-11	0.504527	0.000900986	2.56256e-10	0.00287568	0.00486184	2.81605	0.424128	0.330875	shared
PC(16:0/18:2)	PI(36:2)	0.949313	4.51025e-14	0.824771	1.07782e-10	2.29912e-12	1.58084e-09	0.00467977	2.82829	0.424128	0.124542	shared
BMP(18:1/16:0)	Asparagine	-0.583333	0.0139708	-0.0191571	0.92292	0.0321967	0.953509	0.0049982	-2.80715	0.424128	-0.564176	SCZ-only
N-acetyl-L-alanine	Methionine	0.489567	0.00115975	0.828275	4.23439e-11	0.00347041	6.83854e-10	0.00508033	-2.8019	0.424128	-0.338709	Control-only
Cholesterol	Oleoylcarnitine	0.867769	3.98898e-08	0.587636	0.000131284	3.5165e-07	0.000506435	0.0048927	2.81401	0.424128	0.280133	shared
Dimethylglycine	L-Serine	0.727241	7.22813e-08	0.91617	1.13757e-16	5.99716e-07	8.80253e-15	0.00545543	-2.77883	0.437881	-0.188929	shared
N-acetyl-L-alanine	L-Lysine	0.493183	0.00105191	0.824975	5.89598e-11	0.00317913	9.25465e-10	0.00621651	-2.73614	0.445796	-0.331792	Control-only
Betaine	7-Methylguanosine	0.74251	6.25684e-08	0.312177	0.0530175	5.28792e-07	0.104873	0.0061227	2.74114	0.445796	0.430333	SCZ-only
5-Hydroxyindoleacetic acid	3-methylphenylacetic acid	0.294651	0.0614707	0.735635	1.42823e-07	0.115905	1.1137e-06	0.00579572	-2.75912	0.445796	-0.440985	Control-only
5-Hydroxyindoleacetic acid	Agmatine	-0.230134	0.19041	-0.702488	4.40638e-05	0.289966	0.000189375	0.00574856	2.76179	0.445796	0.472354	Control-only
Sarcosine	7-Methylguanosine	0.771288	3.60772e-09	0.367875	0.0195209	4.17966e-08	0.0450375	0.0057737	2.76036	0.445796	0.403413	SCZ-only
Urea	Tryptophan	0.628736	1.07175e-05	0.879234	8.40459e-14	5.29606e-05	2.5718e-12	0.0061254	-2.74099	0.445796	-0.250499	shared
L-Glutamic acid	Nicotinamide Riboside	0.747899	4.08234e-05	0.318389	0.159541	0.000174899	0.258405	0.00571411	2.76375	0.445796	0.429511	SCZ-only
O-Phosphoethanolamine	N-carbamoyl-L-aspartate	0.406545	0.0125272	0.78728	2.02279e-08	0.0292456	1.8712e-07	0.00614872	-2.73974	0.445796	-0.380736	Control-only
2-Arachidonylglycerol	L-Palmitoylcarnitine	0.0617647	0.820242	-0.520751	0.010843	0.873665	0.0269362	0.00564659	2.76763	0.445796	0.582516	Control-only
N-acetyl-glutamate	5-Hydroxyindoleacetic acid	0.29175	0.0641932	0.731648	8.16647e-08	0.120196	6.69107e-07	0.00622911	-2.73547	0.445796	-0.439898	Control-only
L-Serine	5-Hydroxyindoleacetic acid	-0.0133287	0.934083	0.555238	0.000200235	0.954717	0.000741317	0.00564373	-2.76779	0.445796	-0.568566	Control-only
L-leucine + L-Isoleucine	Nicotinamide Riboside	0.741107	5.22174e-05	0.31049	0.170731	0.000217301	0.27288	0.00622452	2.73571	0.445796	0.430616	SCZ-only
7-Methylguanosine	Oxaloacetic acid	0.669948	1.66131e-06	0.174713	0.280917	1.00356e-05	0.401171	0.00604004	2.7456	0.445796	0.495236	SCZ-only
Creatine	Lysine	0.500065	0.000870995	0.828651	4.07615e-11	0.00269517	6.605e-10	0.00601654	-2.74688	0.445796	-0.328585	shared
Creatine	Serotonin	0.460533	0.0024461	0.812195	1.99717e-10	0.00684588	2.77523e-09	0.00593471	-2.75137	0.445796	-0.351662	Control-only
Linoleylcarnitine	Asparagine	-0.641558	0.00172007	-0.127267	0.502742	0.00498288	0.618429	0.00614188	-2.74011	0.445796	-0.514292	SCZ-only
Creatine	L-Carnitine	0.388134	0.012156	0.779023	3.21284e-09	0.0284842	3.43372e-08	0.00610772	-2.74194	0.445796	-0.39089	Control-only
L-Palmitoylcarnitine	PI(38:5)	0.789474	9.78107e-05	0.414439	0.0107647	0.000378932	0.0267782	0.00645495	2.72373	0.446559	0.375035	SCZ-only
L-Lysine	L-Kynurenine	0.673287	1.41027e-06	0.894966	6.82945e-15	8.69259e-06	2.81207e-13	0.00641004	-2.72603	0.446559	-0.221679	shared
L-leucine + L-Isoleucine	Asparagine	0.474842	0.00170711	0.816323	1.36072e-10	0.00494731	1.95049e-09	0.0064282	-2.7251	0.446559	-0.341481	Control-only
Sarcosine	Creatine	0.509627	0.000665679	0.831183	3.14448e-11	0.00211526	5.22343e-10	0.00639995	-2.72655	0.446559	-0.321556	shared
L-Methionine	Arginine	0.773862	2.96719e-09	0.930156	4.01463e-18	3.52472e-08	5.72084e-16	0.00640528	-2.72628	0.446559	-0.156294	shared
N-acetyl-L-alanine	L-Phenylalanine	0.319873	0.0414743	0.744969	3.53143e-08	0.0831203	3.10899e-07	0.00637296	-2.72795	0.446559	-0.425096	Control-only
Threonine	Creatine	0.522152	0.000462463	0.835726	1.9531e-11	0.0015204	3.39574e-10	0.00658639	-2.71706	0.447136	-0.313574	shared
Indole	Allantoin	0.247423	0.355544	0.706532	0.000343365	0.472085	0.00121077	0.00658421	-2.71717	0.447136	-0.45911	Control-only
Methylcysteine	7-Methylguanosine	0.781306	1.66151e-09	0.398621	0.0108426	2.11185e-08	0.0269362	0.00665817	2.71347	0.447824	0.382685	SCZ-only
Hydroxyproline	Allantoin	0.375276	0.152053	0.769981	4.46225e-05	0.241873	0.000191494	0.00674353	-2.70925	0.448425	-0.394705	Control-only
Pyruvic acid	Xanthine	0.209009	0.189703	0.684932	1.08829e-06	0.289192	7.04291e-06	0.00670137	-2.71133	0.448425	-0.475923	Control-only
PI(36:4)	PI(36:1)	0.849329	8.23106e-06	0.556807	0.000420369	4.18817e-05	0.00144922	0.00675971	2.70846	0.448425	0.292522	shared
Nicotinamide Riboside	Plasmalogen(p16:0/20:4)	-0.0376746	0.871202	-0.580247	0.0058234	0.909712	0.0155423	0.00679545	2.70671	0.448747	0.542572	Control-only
Asparagine	3-methylphenylacetic acid	0.449963	0.00315986	0.803283	1.28269e-09	0.00862904	1.4987e-08	0.00697448	-2.69806	0.45642	-0.35332	Control-only
Creatine	L-Tyrosine	0.562274	0.000130262	0.849798	4.05485e-12	0.000488497	8.12927e-11	0.00733374	-2.6813	0.461232	-0.287524	shared
Creatine	L-Kynurenine	0.497713	0.000929438	0.823452	6.85353e-11	0.00285352	1.05975e-09	0.00715432	-2.68957	0.461232	-0.325739	Control-only
L-Glutamine	L-Kynurenine	0.671196	1.56299e-06	0.892204	1.09105e-14	9.50886e-06	4.23606e-13	0.00729247	-2.68318	0.461232	-0.221007	shared
Glycerophosphocholine	Ascorbic acid	0.767422	4.81625e-09	0.926635	9.9087e-18	5.40731e-08	1.16148e-15	0.00726371	-2.68451	0.461232	-0.159213	shared
N-Acetylornithine	7-Methylguanosine	0.790418	7.91812e-10	0.42368	0.00644477	1.09141e-08	0.0170256	0.00722975	2.68607	0.461232	0.366739	SCZ-only
L-Valine	Asparagine	0.496166	0.000969748	0.822928	7.21548e-11	0.0029548	1.10864e-09	0.00711471	-2.69143	0.461232	-0.326762	Control-only
L-Proline	PI(36:1)	-0.568421	0.00892276	-0.0267765	0.876808	0.0217463	0.920641	0.00741671	-2.67753	0.464439	-0.541645	SCZ-only
N-acetyl-L-alanine	Serotonin	0.472928	0.00179288	0.811257	2.17632e-10	0.00517215	3.00122e-09	0.00756603	-2.67085	0.46974	-0.338329	Control-only
7-Methylguanosine	Methionine	0.788431	9.33606e-10	0.421964	0.00668674	1.26761e-08	0.0175913	0.00753377	2.67228	0.46974	0.366467	SCZ-only
Methionine sulfoxide	7-Methylguanosine	0.744871	2.34214e-08	0.33202	0.0363424	2.20808e-07	0.0761148	0.00762713	2.66815	0.471519	0.412851	SCZ-only
Leucine+isoleucine	Allantoin	0.382634	0.14354	0.769331	4.57081e-05	0.23091	0.00019569	0.00769547	-2.66515	0.473375	-0.386697	Control-only
Creatine	Tyrosine	0.533827	0.000325103	0.836906	1.72169e-11	0.00110508	3.0333e-10	0.00772232	-2.66398	0.473375	-0.303079	shared
L-Carnitine	5-Hydroxyindoleacetic acid	0.401359	0.00929937	0.777465	3.61783e-09	0.0225469	3.83553e-08	0.00788401	-2.657	0.475829	-0.376106	Control-only
Adenine	Asparagine	0.461002	0.00241802	0.804822	3.87441e-10	0.00677904	5.09173e-09	0.00789336	-2.6566	0.475829	-0.34382	Control-only
7-Methylguanosine	Suberylcarnitine	0.649661	7.63675e-06	0.159591	0.325283	3.91899e-05	0.448627	0.0078756	2.65736	0.475829	0.49007	SCZ-only
Sarcosine	L-Kynurenine	0.668148	1.81321e-06	0.889817	1.61905e-14	1.08628e-05	5.94264e-13	0.00788469	-2.65697	0.475829	-0.221669	shared
5-Hydroxyindoleacetic acid	Leucine+isoleucine	0.154171	0.335839	0.645869	6.76988e-06	0.451432	3.55794e-05	0.00797489	-2.65313	0.478757	-0.491698	Control-only
Guanidinoacetic acid	5-Hydroxyindoleacetic acid	0.173811	0.27712	0.656971	4.13604e-06	0.388797	2.29631e-05	0.00806703	-2.64925	0.478982	-0.483161	Control-only
3-Hydroxyhexanoylcarnitine	2-Arachidonylglycerol	-0.0300958	0.883965	-0.566496	0.0025518	0.918616	0.00743892	0.0080289	2.65085	0.478982	0.5364	Control-only
Creatine	Orotic acid	0.502041	0.000964276	0.821802	8.05407e-11	0.00294245	1.22454e-09	0.00822972	-2.6425	0.484054	-0.319762	shared
Alanine	7-Methylguanosine	0.749652	1.69837e-08	0.346655	0.028425	1.64822e-07	0.0619426	0.00820775	2.6434	0.484054	0.402996	SCZ-only
Normetanephrine	Guanidoacetic acid	-0.34159	0.0697401	-0.746703	3.28735e-06	0.128812	1.8672e-05	0.00830823	2.63928	0.486701	0.405113	Control-only
Pipecolic acid	Glycerophosphocholine	0.882965	2.21971e-14	0.963877	1.95627e-23	1.26665e-12	9.70233e-21	0.0083897	-2.63597	0.4895	-0.0809116	shared
Malonylcarnitine	Octanoylcarnitine	0.689547	6.15856e-07	0.234775	0.144776	4.11553e-06	0.239426	0.00849207	2.63185	0.493491	0.454772	SCZ-only
Nicotinamide Riboside	Cinnamoylglycine	-0.566286	0.0114825	-0.0361384	0.886795	0.0271389	0.927975	0.00870758	-2.62333	0.503999	-0.530148	SCZ-only
N-acetyl-L-alanine	Lysine	0.506534	0.000726779	0.821802	8.05407e-11	0.00228988	1.22454e-09	0.00888609	-2.61641	0.509958	-0.315268	shared
Creatine	Tryptophan	0.446739	0.0034111	0.795064	8.9316e-10	0.00924388	1.07379e-08	0.00886982	-2.61703	0.509958	-0.348325	Control-only
Guanidinoacetic acid	L-Kynurenine	0.740657	3.09126e-08	0.914763	1.54142e-16	2.82452e-07	1.09826e-14	0.00891584	-2.61526	0.509958	-0.174106	shared
Suberylcarnitine	Glycine	0.679117	2.00526e-06	0.221701	0.16917	1.18956e-05	0.270895	0.00914373	2.60663	0.512234	0.457416	SCZ-only
Alanine	Suberylcarnitine	0.774167	7.4192e-09	0.404334	0.00966225	7.94298e-08	0.0243652	0.00916719	2.60576	0.512234	0.369833	SCZ-only
Pipecolic acid	Creatine	0.497909	0.00092444	0.81747	1.22102e-10	0.00284238	1.77298e-09	0.00907572	-2.60919	0.512234	-0.319561	Control-only
Alanine	L-Kynurenine	0.665854	2.02526e-06	0.886679	2.68328e-14	1.20094e-05	9.24206e-13	0.00904151	-2.61048	0.512234	-0.220826	shared
L-leucine + L-Isoleucine	Allantoin	0.331126	0.210288	0.738142	0.000133416	0.313822	0.000514103	0.00911343	-2.60777	0.512234	-0.407016	Control-only
5-Hydroxyindoleacetic acid	Riboflavin	-0.0471316	0.769813	-0.568827	0.000128267	0.835988	0.000495972	0.00954548	2.59187	0.516176	0.521696	Control-only
5-Hydroxyindoleacetic acid	2-Arachidonylglycerol	0.0735168	0.721158	0.587692	0.00159393	0.7977	0.00486309	0.00932401	-2.59994	0.516176	-0.514175	Control-only
Suberylcarnitine	2-Arachidonylglycerol	0.708101	7.48897e-05	0.277654	0.169654	0.000299559	0.271548	0.00959303	2.59016	0.516176	0.430447	SCZ-only
L-Tryptophan	7-Methylguanosine	0.741886	2.8524e-08	0.34123	0.0311747	2.62997e-07	0.0669214	0.00947876	2.59429	0.516176	0.400656	SCZ-only
L-Lysine	Suberylcarnitine	0.763021	1.63156e-08	0.383139	0.0146761	1.58976e-07	0.035259	0.00942	2.59642	0.516176	0.379881	SCZ-only
PI(36:4)	PI(36:2)	0.861002	1.65851e-08	0.603199	4.81476e-05	1.61493e-07	0.000204807	0.00949467	2.59371	0.516176	0.257803	shared
beta-Alanine	Asparagine	0.414684	0.00702353	0.777689	3.55679e-09	0.0176589	3.77633e-08	0.00959113	-2.59023	0.516176	-0.363005	Control-only
7-Methylguanosine	Aspartic acid	0.723875	8.87605e-08	0.306126	0.0547161	7.22821e-07	0.10775	0.00944362	2.59556	0.516176	0.417749	SCZ-only
Threonine	N-acetyl-L-alanine	0.527792	0.000390684	0.829534	3.72529e-11	0.001306	6.0939e-10	0.00943332	-2.59594	0.516176	-0.301741	shared
Adipoylcarnitine	2-Arachidonylglycerol	0.759788	6.72597e-06	0.378462	0.0565879	3.50484e-05	0.11076	0.00968698	2.58681	0.518724	0.381326	SCZ-only
5-Hydroxyindoleacetic acid	Oxaloacetic acid	0.301372	0.0555141	0.720023	1.63211e-07	0.106245	1.25717e-06	0.00978321	-2.5834	0.518724	-0.41865	Control-only
L-Valine	L-Kynurenine	0.728342	6.75418e-08	0.909048	5.02667e-16	5.6426e-07	2.99437e-14	0.00976291	-2.58412	0.518724	-0.180706	shared
L-Proline	Allantoin	0.295806	0.265979	0.716699	0.000256782	0.377505	0.000928903	0.00987637	-2.58013	0.520579	-0.420893	Control-only
Cystine	Allantoin	0.381163	0.145216	0.760234	6.34947e-05	0.233219	0.000262559	0.00994567	-2.57771	0.520579	-0.379071	Control-only
Sarcosine	N-acetyl-L-alanine	0.517968	0.000523111	0.82396	6.51928e-11	0.00169675	1.01345e-09	0.00993108	-2.57822	0.520579	-0.305991	shared
5-Hydroxyindoleacetic acid	L-Tryptophan	0.208426	0.190968	0.667792	2.50848e-06	0.290663	1.47079e-05	0.00996153	-2.57716	0.520579	-0.459367	Control-only
N-acetyl-L-alanine	Orotic acid	0.512337	0.000725535	0.820958	8.74198e-11	0.00228695	1.31673e-09	0.0101336	-2.57124	0.522058	-0.308621	shared
N-acetyl-L-alanine	L-Kynurenine	0.494294	0.00102061	0.812946	1.86389e-10	0.00309164	2.60246e-09	0.0101243	-2.57155	0.522058	-0.318652	Control-only
Guanidinoacetic acid	Creatine	0.575256	8.3415e-05	0.848243	4.8615e-12	0.000328594	9.57479e-11	0.0100505	-2.57409	0.522058	-0.272987	shared
N-acetyl-L-alanine	L-Carnitine	0.398136	0.00993639	0.767953	7.31921e-09	0.0238842	7.36226e-08	0.0101293	-2.57138	0.522058	-0.369818	Control-only
Homocysteine	Octanoylcarnitine	0.0294425	0.855007	0.552277	0.000220077	0.89764	0.000806765	0.010345	-2.56408	0.528778	-0.522835	Control-only
L-Acetylcarnitine	Mevalonic acid	0.549911	0.00243338	0.0265535	0.893303	0.00681553	0.932972	0.0104107	2.56188	0.528778	0.523357	SCZ-only
Urea	5-Hydroxyindoleacetic acid	0.281321	0.0747811	0.707069	3.39441e-07	0.136348	2.46442e-06	0.0103475	-2.56399	0.528778	-0.425748	Control-only
7-Methylguanosine	11,12-DiHETrE	0.772125	3.38636e-09	0.408782	0.00882118	3.9484e-08	0.0224901	0.010446	2.56071	0.528778	0.363344	SCZ-only
Leucine+isoleucine	Asparagine	0.496558	0.000959394	0.813116	1.83486e-10	0.00293125	2.56686e-09	0.0104451	-2.56073	0.528778	-0.316558	Control-only
L-Kynurenine	Leucine+isoleucine	0.741125	2.99825e-08	0.91275	2.35916e-16	2.74817e-07	1.61539e-14	0.0105288	-2.55796	0.531117	-0.171625	shared
Zymosterol	Leucine+isoleucine	-0.534504	0.000318403	-0.00760028	0.962876	0.00108433	0.977674	0.0107885	-2.54948	0.531305	-0.526904	SCZ-only
Hydroxyproline	7-Methylguanosine	0.771898	3.44526e-09	0.410396	0.00853185	4.00742e-08	0.0218098	0.0107764	2.54987	0.531305	0.361502	SCZ-only
Xanthine	Eicosapentaenoic acid	0.628231	1.424e-05	0.148099	0.368245	6.83446e-05	0.491998	0.0107266	2.55148	0.531305	0.480132	SCZ-only
L-Methionine	Allantoin	0.357616	0.173857	0.745939	0.000103531	0.269793	0.000408696	0.0106873	-2.55276	0.531305	-0.388323	Control-only
Methionine sulfoxide	Asparagine	0.478433	0.00155595	0.804335	4.04391e-10	0.00454459	5.28106e-09	0.0106564	-2.55377	0.531305	-0.325901	Control-only
L-Tryptophan	Nicotinamide Riboside	0.798419	4.96952e-06	0.465736	0.033354	2.68291e-05	0.0708047	0.0106823	2.55292	0.531305	0.332683	SCZ-only
L-Kynurenine	Lysine	0.686122	7.36489e-07	0.891599	1.20683e-14	4.79592e-06	4.65284e-13	0.0107551	-2.55056	0.531305	-0.205477	shared
Purine	Butyrylcarnitine	0.178872	0.263152	0.646523	8.73244e-06	0.374261	4.47662e-05	0.0108347	-2.54799	0.531779	-0.467651	Control-only
Plasmalogen(p16:0/20:4)	PI(36:1)	0.851128	1.96153e-06	0.586456	0.00017071	1.16505e-05	0.000640824	0.010902	2.54582	0.531955	0.264672	shared
Glycerophosphocholine	Arginine	0.626301	1.18654e-05	0.867583	4.35146e-13	5.78845e-05	1.09426e-11	0.0109115	-2.54552	0.531955	-0.241282	shared
5-Hydroxyindoleacetic acid	Arginine	0.111958	0.48586	0.603968	3.68554e-05	0.596365	0.000161256	0.011044	-2.5413	0.534822	-0.49201	Control-only
Arginine	Methionine	0.789536	8.52084e-10	0.9295	4.76813e-18	1.16521e-08	6.41711e-16	0.0113823	-2.53074	0.549376	-0.139964	shared
L-leucine + L-Isoleucine	7-Methylguanosine	0.72439	8.60305e-08	0.321043	0.0433947	7.02164e-07	0.0884423	0.0114512	2.52862	0.550871	0.403347	SCZ-only
L-Valine	5-Hydroxyindoleacetic acid	0.189267	0.23595	0.649592	5.75161e-06	0.343544	3.07578e-05	0.0115927	-2.52431	0.555835	-0.460325	Control-only
7-Methylguanosine	Aspartylglycosamine	0.730337	1.31136e-07	0.333716	0.0406032	1.02043e-06	0.0834984	0.0116744	2.52184	0.557915	0.396621	SCZ-only
Pipecolic acid	N-acetyl-L-alanine	0.499107	0.000894398	0.810996	2.2288e-10	0.00275937	3.06196e-09	0.0117651	-2.51911	0.558575	-0.311889	Control-only
Suberylcarnitine	Lysine	0.757542	2.36648e-08	0.387278	0.0135533	2.22814e-07	0.0329426	0.0117634	2.51916	0.558575	0.370264	SCZ-only
beta-Alanine	7-Methylguanosine	0.802701	2.74693e-10	0.481257	0.00166779	4.29112e-09	0.00507036	0.0118049	2.51792	0.558638	0.321444	SCZ-only
L-leucine + L-Isoleucine	L-Kynurenine	0.729965	6.10772e-08	0.906754	7.90564e-16	5.1762e-07	4.48861e-14	0.0119853	-2.51258	0.56533	-0.176789	shared
7-Methylguanosine	Ascorbic acid	0.783798	1.36146e-09	0.44237	0.00426089	1.77392e-08	0.0117496	0.0120349	2.51112	0.565835	0.341428	SCZ-only
L-Proline	Indole	0.761739	7.29206e-09	0.918566	6.69751e-17	7.82994e-08	5.59474e-15	0.012115	-2.50878	0.565938	-0.156828	shared
Citrulline	Asparagine	0.406744	0.00831316	0.766265	8.2659e-09	0.0204078	8.25171e-08	0.0121025	-2.50914	0.565938	-0.359521	Control-only
L-Kynurenine	Methionine	0.710894	1.90739e-07	0.89901	3.3587e-15	1.43578e-06	1.53037e-13	0.012322	-2.50279	0.571429	-0.188116	shared
Creatine	Adenine	0.564352	0.000121444	0.838782	1.40603e-11	0.000458509	2.50448e-10	0.0123505	-2.50197	0.571429	-0.274431	shared
Pipecolic acid	L-Kynurenine	0.681563	9.3111e-07	0.88671	2.67013e-14	5.90706e-06	9.2186e-13	0.0128991	-2.48654	0.584594	-0.205147	shared
N-acetyl-L-alanine	Tyrosine	0.548615	0.00020417	0.830808	3.2686e-11	0.000728075	5.39264e-10	0.0128914	-2.48675	0.584594	-0.282193	shared
N-acetyl-L-alanine	L-Tyrosine	0.581199	6.75894e-05	0.845014	7.04122e-12	0.000273597	1.34134e-10	0.0129168	-2.48606	0.584594	-0.263815	shared
[truncated: 5,499 more rows]

## Sheet: Hub_Metabolites
metabolite	degree_sc	betweenness_sc	eigenvector_sc	degree_ct	betweenness_ct	eigenvector_ct	delta_degree	delta_betweenness
[truncated: 171 more rows]

[truncated: 5 more sheets: Pathway_Enrichment, Metabolite_Gene_Map, Gene_Network_Modules, Clinical_Correlations, Classifier_Performance]
