# Supplementary material
Source: Research Square preprint supplement (doi:10.21203/rs.3.rs-10343202/v1)
Supplement: Supplementary file 4 [file 996865a06e4e43604a17458e.docx]

**Table S4.** The top ten Random-Forest features with LASSO selection frequency and PLS-DA loadings

| # | Metabolite | RF importance | LASSO selection freq (default) | LASSO selection freq (sparse) | PLS-DA loading (component 1) |
| --- | --- | --- | --- | --- | --- |
| 1 | Plasmalogen (p16:0/20:4) | 0.0532 | 1.0 | 1.0 | 0.268 |
| 2 | PC (16:0/18:2) | 0.0435 | 1.0 | 0.2 | 0.243 |
| 3 | Cholesterol | 0.039 | 0.6 | 0.0 | 0.189 |
| 4 | PI (38:4) | 0.0262 | 0.4 | 0.0 | 0.176 |
| 5 | Hypoxanthine | 0.0259 | 1.0 | 0.0 | -0.13 |
| 6 | Phosphorylcholine | 0.0258 | 0.6 | 0.2 | 0.215 |
| 7 | Dimethylglycine | 0.0183 | 0.6 | 0.0 | 0.11 |
| 8 | PI (38:3) | 0.0183 | 0.2 | 0.0 | 0.156 |
| 9 | 1-Methylnicotinamide | 0.0167 | 1.0 | 0.0 | -0.131 |
| 10 | 2-Octenoylcarnitine | 0.0165 | 1.0 | 0.4 | 0.183 |
