# Supplementary material
Source: Research Square preprint supplement (doi:10.21203/rs.3.rs-10343202/v1)
Supplement: Supplementary file 5 [file 9b761419cc809032fd3fe1b6.docx]

**Table S1.** Demographics and clinical characteristics.

| Variable | Schizophrenia (n = 41) | Control (n = 40) | Test statistic | p value |
| --- | --- | --- | --- | --- |
| Age, years (mean ± SD) | 45.3 ± 11.4 | 39.3 ± 13.1 | Welch t = 2.20 | 0.031 |
| Sex, female (n, %) | 18 (44%) | 30 (75%) | Fisher OR = 0.26 | 0.0065 |
| Current smoker (n, %) | 15 (37%) | not recorded # | –# | –# |
| PANSS total (median, IQR) | 53 (49–65) | –# | –# | –# |
| - PANSS positive | 24 (20–34) | –# | –# | –# |
| - PANSS negative | 32 (18–39) | –# | –# | –# |
| - PANSS general | 114 (93–138) | –# | –# | –# |
| BPRS total | 66 (58–82) | –# | –# | –# |
| MADRS | 22 (16–29) | –# | –# | –# |
| MoCA | 24 (21–26) | –# | –# | –# |
| SHAPS (anhedonia) | 9 (7–12) | –# | –# | –# |
| Illness duration, years (median, IQR) | 23 (14–28) | –# | –# | –# |
| CPZ equivalent dose, mg/day (median, IQR) | 519 (340–1125) | –# | –# | –# |
| Antipsychotic class, atypical (n, %) | 14 (34%) | –# | –# | –# |
| typical (n, %) | 27 (66%) | –# | –# | –# |
| On clozapine (n, %) | 11 (27%) | –# | –# | –# |
| Polytherapy (n, %) | 22 (54%) | –# | –# | –# |
| Predominantly positive symptoms (n, %) | 27 (66%) | –# | –# | –# |
| Late-onset (n, %) | 21 (51%) | –# | –# | –# |
| Treatment responders (n, %) | 33 (80%) | –# | –# | –# |
